# Supplementary material for: Protein-Protein Interactions: Gene Acronym Redundancies and Current Limitations Precluding Automated Data Integration
Source: Proteomes. 2013 May 31;1(1):3–24. doi: 10.3390/proteomes1010003 (PMC5314489; doi:10.3390/proteomes1010003)
Supplement: Supplementary file 1 [file proteomes-01-00003-s001.csv]

#Format: tax_id GeneID Symbol LocusTag Synonyms dbXrefs chromosome map_location description type_of_gene Symbol_from_nomenclature_authority Full_name_from_nomenclature_authority Nomenclature_status Other_designations Modification_date (tab is used as a separator, pound sign - start of a comment)
9606	1	A1BG	-	A1B|ABG|GAB|HYST2477	HGNC:5|MIM:138670|Ensembl:ENSG00000121410|HPRD:00726|Vega:OTTHUMG00000183507	19	19q13.4	alpha-1-B glycoprotein	protein-coding	A1BG	alpha-1-B glycoprotein	O	alpha-1B-glycoprotein	20130505
9606	2	A2M	-	A2MD|CPAMD5|FWP007|S863-7	HGNC:7|MIM:103950|Ensembl:ENSG00000175899|HPRD:00072|Vega:OTTHUMG00000150267	12	12p13.31	alpha-2-macroglobulin	protein-coding	A2M	alpha-2-macroglobulin	O	C3 and PZP-like alpha-2-macroglobulin domain-containing protein 5|alpha-2-M	20130505
9606	3	A2MP1	-	A2MP	HGNC:8|Ensembl:ENSG00000256069	12	12p13.31	alpha-2-macroglobulin pseudogene 1	pseudo	A2MP1	alpha-2-macroglobulin pseudogene 1	O	-	20130308
9606	9	NAT1	-	AAC1|MNAT|NAT-1|NATI	HGNC:7645|MIM:108345|Ensembl:ENSG00000171428|HPRD:00149|Vega:OTTHUMG00000097001	8	8p22	N-acetyltransferase 1 (arylamine N-acetyltransferase)	protein-coding	NAT1	N-acetyltransferase 1 (arylamine N-acetyltransferase)	O	N-acetyltransferase type 1|arylamide acetylase 1|arylamine N-acetyltransferase 1|monomorphic arylamine N-acetyltransferase	20130505
9606	10	NAT2	-	AAC2|NAT-2|PNAT	HGNC:7646|MIM:612182|Ensembl:ENSG00000156006|HPRD:02000|Vega:OTTHUMG00000130826	8	8p22	N-acetyltransferase 2 (arylamine N-acetyltransferase)	protein-coding	NAT2	N-acetyltransferase 2 (arylamine N-acetyltransferase)	O	N-acetyltransferase type 2|arylamide acetylase 2|arylamine N-acetyltransferase 2	20130505
9606	11	AACP	-	NATP	HGNC:15	8	8p22	arylamide acetylase pseudogene	pseudo	AACP	arylamide acetylase pseudogene	O	-	20130226
9606	12	SERPINA3	GIG24	AACT|ACT|GIG25	HGNC:16|MIM:107280|Ensembl:ENSG00000196136|HPRD:00120|Vega:OTTHUMG00000029851	14	14q32.1	serpin peptidase inhibitor, clade A (alpha-1 antiproteinase, antitrypsin), member 3	protein-coding	SERPINA3	serpin peptidase inhibitor, clade A (alpha-1 antiproteinase, antitrypsin), member 3	O	alpha-1-antichymotrypsin|cell growth-inhibiting gene 24/25 protein|growth-inhibiting protein 24|growth-inhibiting protein 25|serine (or cysteine) proteinase inhibitor, clade A, member 3|serpin A3	20130505
9606	13	AADAC	-	CES5A1|DAC	HGNC:17|MIM:600338|Ensembl:ENSG00000114771|HPRD:02640|Vega:OTTHUMG00000159876	3	3q25.1	arylacetamide deacetylase	protein-coding	AADAC	arylacetamide deacetylase	O	arylacetamide deacetylase (esterase)	20130505
9606	14	AAMP	-	-	HGNC:18|MIM:603488|Ensembl:ENSG00000127837|HPRD:04600|Vega:OTTHUMG00000155202	2	2q35	angio-associated, migratory cell protein	protein-coding	AAMP	angio-associated, migratory cell protein	O	angio-associated migratory cell protein	20130505
9606	15	AANAT	-	DSPS|SNAT	HGNC:19|MIM:600950|Ensembl:ENSG00000129673|HPRD:02974|Vega:OTTHUMG00000180179	17	17q25	aralkylamine N-acetyltransferase	protein-coding	AANAT	aralkylamine N-acetyltransferase	O	arylalkylamine N-acetyltransferase|serotonin N-acetyltransferase|serotonin acetylase	20130505
9606	16	AARS	-	CMT2N	HGNC:20|MIM:601065|Ensembl:ENSG00000090861|HPRD:03042|Vega:OTTHUMG00000177042	16	16q22	alanyl-tRNA synthetase	protein-coding	AARS	alanyl-tRNA synthetase	O	alaRS|alanine tRNA ligase 1, cytoplasmic|alanine--tRNA ligase, cytoplasmic|alanyl-tRNA synthetase, cytoplasmic|renal carcinoma antigen NY-REN-42	20130505
9606	17	AAVS1	-	AAV	HGNC:22|MIM:102699	19	19q13|19q13-qter	adeno-associated virus integration site 1	other	AAVS1	adeno-associated virus integration site 1	O	-	20130226
9606	18	ABAT	hCG_1984265	GABA-AT|GABAT|NPD009	HGNC:23|MIM:137150|Ensembl:ENSG00000183044|HPRD:00661|Vega:OTTHUMG00000048201	16	16p13.2	4-aminobutyrate aminotransferase	protein-coding	ABAT	4-aminobutyrate aminotransferase	O	(S)-3-amino-2-methylpropionate transaminase|4-aminobutyrate aminotransferase, mitochondrial|4-aminobutyrate transaminase|GABA aminotransferase|GABA transaminase|GABA transferase|gamma-amino-N-butyrate transaminase	20130505
9606	19	ABCA1	-	ABC-1|ABC1|CERP|HDLDT1|TGD	HGNC:29|MIM:600046|Ensembl:ENSG00000165029|HPRD:02501|Vega:OTTHUMG00000020417	9	9q31.1	ATP-binding cassette, sub-family A (ABC1), member 1	protein-coding	ABCA1	ATP-binding cassette, sub-family A (ABC1), member 1	O	ATP-binding cassette sub-family A member 1|ATP-binding cassette transporter A1|cholesterol efflux regulatory protein|membrane-bound	20130512
9606	20	ABCA2	RP11-229P13.8	ABC2	HGNC:32|MIM:600047|Ensembl:ENSG00000107331|HPRD:08967|Vega:OTTHUMG00000020958	9	9q34	ATP-binding cassette, sub-family A (ABC1), member 2	protein-coding	ABCA2	ATP-binding cassette, sub-family A (ABC1), member 2	O	ATP-binding cassette 2|ATP-binding cassette sub-family A member 2|ATP-binding cassette transporter 2|ATP-binding cassette, sub-family A, member 2	20130505
9606	21	ABCA3	-	ABC-C|ABC3|EST111653|LBM180|SMDP3	HGNC:33|MIM:601615|Ensembl:ENSG00000167972|HPRD:03369|Vega:OTTHUMG00000128845	16	16p13.3	ATP-binding cassette, sub-family A (ABC1), member 3	protein-coding	ABCA3	ATP-binding cassette, sub-family A (ABC1), member 3	O	ABC transporter 3|ABC-C transporter|ATP-binding cassette sub-family A member 3|ATP-binding cassette transporter 3	20130512
9606	22	ABCB7	-	ABC7|ASAT|Atm1p|EST140535	HGNC:48|MIM:300135|Ensembl:ENSG00000131269|HPRD:02137|Vega:OTTHUMG00000021862	X	Xq13.3	ATP-binding cassette, sub-family B (MDR/TAP), member 7	protein-coding	ABCB7	ATP-binding cassette, sub-family B (MDR/TAP), member 7	O	ABC transporter 7 protein|ATP-binding cassette sub-family B member 7, mitochondrial|ATP-binding cassette transporter 7	20130505
9606	23	ABCF1	DADB-129D20.7	ABC27|ABC50	HGNC:70|MIM:603429|Ensembl:ENSG00000204574|HPRD:09139|Vega:OTTHUMG00000031094	6	6p21.33	ATP-binding cassette, sub-family F (GCN20), member 1	protein-coding	ABCF1	ATP-binding cassette, sub-family F (GCN20), member 1	O	ATP-binding cassette 50 (TNF-alpha stimulated)|ATP-binding cassette sub-family F member 1|TNF-alpha-stimulated ABC protein|TNFalpha-inducible ATP-binding protein	20130505
9606	24	ABCA4	-	ABC10|ABCR|ARMD2|CORD3|FFM|RMP|RP19|STGD|STGD1	HGNC:34|MIM:601691|Ensembl:ENSG00000198691|HPRD:03408|Vega:OTTHUMG00000010622	1	1p22	ATP-binding cassette, sub-family A (ABC1), member 4	protein-coding	ABCA4	ATP-binding cassette, sub-family A (ABC1), member 4	O	ATP binding cassette transporter|ATP-binding cassette sub-family A member 4|ATP-binding cassette transporter, retinal-specific|ATP-binding transporter, retina-specific|RIM ABC transporter|RIM protein|photoreceptor rim protein|retina-specific ABC transporter|retinal-specific ATP-binding cassette transporter|stargardt disease protein	20130505
9606	25	ABL1	RP11-83J21.1	ABL|JTK7|bcr/abl|c-ABL|p150|v-abl	HGNC:76|MIM:189980|Ensembl:ENSG00000097007|HPRD:01809|Vega:OTTHUMG00000020813	9	9q34.1	c-abl oncogene 1, non-receptor tyrosine kinase	protein-coding	ABL1	c-abl oncogene 1, non-receptor tyrosine kinase	O	Abelson tyrosine-protein kinase 1|bcr/c-abl oncogene protein|c-abl oncogene 1, receptor tyrosine kinase|proto-oncogene c-Abl|proto-oncogene tyrosine-protein kinase ABL1|tyrosine-protein kinase ABL1|v-abl Abelson murine leukemia viral oncogene homolog 1	20130512
9606	26	ABP1	-	ABP|AOC1|DAO|DAO1|KAO	HGNC:80|MIM:104610|Ensembl:ENSG00000002726|HPRD:00088|Vega:OTTHUMG00000158306	7	7q36.1	amiloride binding protein 1 (amine oxidase (copper-containing))	protein-coding	ABP1	amiloride binding protein 1 (amine oxidase (copper-containing))	O	amiloride-sensitive amine oxidase|amiloride-sensitive amine oxidase [copper-containing]|diamine oxidase|histaminase|kidney amine oxidase	20130504
9606	27	ABL2	RP11-177A2.3	ABLL|ARG	HGNC:77|MIM:164690|Ensembl:ENSG00000143322|HPRD:01259|Vega:OTTHUMG00000035199	1	1q25.2	v-abl Abelson murine leukemia viral oncogene homolog 2	protein-coding	ABL2	v-abl Abelson murine leukemia viral oncogene homolog 2	O	Abelson tyrosine-protein kinase 2|abelson-related gene protein|tyrosine-protein kinase ARG	20130505
9606	28	ABO	-	A3GALNT|A3GALT1|GTB|NAGAT	HGNC:79|MIM:110300|HPRD:05821	9	9q34.2	ABO blood group (transferase A, alpha 1-3-N-acetylgalactosaminyltransferase; transferase B, alpha 1-3-galactosyltransferase)	protein-coding	ABO	ABO blood group (transferase A, alpha 1-3-N-acetylgalactosaminyltransferase; transferase B, alpha 1-3-galactosyltransferase)	O	ABO A3 transferase|ABO glycosyltransferase|ABO weak transfer|B(A) alpha-1,3-galactosyltransferase|fucosylglycoprotein 3-alpha-galactosyltransferase|fucosylglycoprotein alpha-N-acetylgalactosaminyltransferase|glycoprotein-fucosylgalactoside alpha-N-acetylgalactosaminyltransferase|glycoprotein-fucosylgalactoside alpha-galactosyltransferase|histo-blood group A transferase|histo-blood group A2 transf…	20130512
9606	29	ABR	-	MDB	HGNC:81|MIM:600365|Ensembl:ENSG00000159842|HPRD:02649|Vega:OTTHUMG00000090313	17	17p13.3	active BCR-related	protein-coding	ABR	active BCR-related	O	active breakpoint cluster region-related protein	20130505
9606	30	ACAA1	-	ACAA|PTHIO|THIO	HGNC:82|MIM:604054|Ensembl:ENSG00000060971|HPRD:06815|Vega:OTTHUMG00000131087	3	3p22.2	acetyl-CoA acyltransferase 1	protein-coding	ACAA1	acetyl-CoA acyltransferase 1	O	3-ketoacyl-CoA thiolase, peroxisomal|acetyl-Coenzyme A acyltransferase 1|beta-ketothiolase|peroxisomal 3-oxoacyl-CoA thiolase|peroxisomal 3-oxoacyl-Coenzyme A thiolase	20130505
9606	31	ACACA	-	ACAC|ACACAD|ACC|ACC1|ACCA	HGNC:84|MIM:200350|Ensembl:ENSG00000132142|HPRD:01938|Vega:OTTHUMG00000133064	17	17q21	acetyl-CoA carboxylase alpha	protein-coding	ACACA	acetyl-CoA carboxylase alpha	O	ACC-alpha|acetyl-CoA carboxylase 1|acetyl-Coenzyme A carboxylase alpha	20130505
9606	32	ACACB	-	ACC2|ACCB|HACC275	HGNC:85|MIM:601557|Ensembl:ENSG00000076555|HPRD:07044|Vega:OTTHUMG00000169250	12	12q24.11	acetyl-CoA carboxylase beta	protein-coding	ACACB	acetyl-CoA carboxylase beta	O	ACC-beta|acetyl-CoA carboxylase 2|acetyl-Coenzyme A carboxylase beta	20130512
9606	33	ACADL	-	ACAD4|LCAD	HGNC:88|MIM:609576|Ensembl:ENSG00000115361|HPRD:01939|Vega:OTTHUMG00000132989	2	2q34	acyl-CoA dehydrogenase, long chain	protein-coding	ACADL	acyl-CoA dehydrogenase, long chain	O	acyl-Coenzyme A dehydrogenase, long chain|long-chain specific acyl-CoA dehydrogenase, mitochondrial	20130505
9606	34	ACADM	RP4-682C21.1	ACAD1|MCAD|MCADH	HGNC:89|MIM:607008|Ensembl:ENSG00000117054|HPRD:08447|Vega:OTTHUMG00000009784	1	1p31	acyl-CoA dehydrogenase, C-4 to C-12 straight chain	protein-coding	ACADM	acyl-CoA dehydrogenase, C-4 to C-12 straight chain	O	acyl-Coenzyme A dehydrogenase, C-4 to C-12 straight chain|medium-chain specific acyl-CoA dehydrogenase, mitochondrial	20130505
9606	35	ACADS	-	ACAD3|SCAD	HGNC:90|MIM:606885|Ensembl:ENSG00000122971|HPRD:06053|Vega:OTTHUMG00000169203	12	12q24.31	acyl-CoA dehydrogenase, C-2 to C-3 short chain	protein-coding	ACADS	acyl-CoA dehydrogenase, C-2 to C-3 short chain	O	acyl-Coenzyme A dehydrogenase, C-2 to C-3 short chain|butyryl-CoA dehydrogenase|mitochondrial short-chain specific acyl-CoA dehydrogenase|short-chain acyl-CoA dehydrogenase|short-chain specific acyl-CoA dehydrogenase, mitochondrial|unsaturated acyl-CoA reductase	20130505
9606	36	ACADSB	RP11-162A23.1	2-MEBCAD|ACAD7|SBCAD	HGNC:91|MIM:600301|Ensembl:ENSG00000196177|HPRD:02626|Vega:OTTHUMG00000019200	10	10q26.13	acyl-CoA dehydrogenase, short/branched chain	protein-coding	ACADSB	acyl-CoA dehydrogenase, short/branched chain	O	2-methyl branched chain acyl-CoA dehydrogenase|2-methylbutyryl-coenzyme A dehydrogenase|acyl-Coenzyme A dehydrogenase, short/branched chain|short/branched chain specific acyl-CoA dehydrogenase, mitochondrial	20130505
9606	37	ACADVL	-	ACAD6|LCACD|VLCAD	HGNC:92|MIM:609575|Ensembl:ENSG00000072778|HPRD:01940|Vega:OTTHUMG00000102157	17	17p13.1	acyl-CoA dehydrogenase, very long chain	protein-coding	ACADVL	acyl-CoA dehydrogenase, very long chain	O	acyl-Coenzyme A dehydrogenase, very long chain|very long-chain specific acyl-CoA dehydrogenase, mitochondrial	20130505
9606	38	ACAT1	-	ACAT|MAT|T2|THIL	HGNC:93|MIM:607809|Ensembl:ENSG00000075239|HPRD:01946|Vega:OTTHUMG00000166381	11	11q22.3	acetyl-CoA acetyltransferase 1	protein-coding	ACAT1	acetyl-CoA acetyltransferase 1	O	acetoacetyl Coenzyme A thiolase|acetoacetyl-CoA thiolase|acetyl-CoA acetyltransferase, mitochondrial|acetyl-Coenzyme A acetyltransferase 1|mitochondrial acetoacetyl-CoA thiolase	20130505
9606	39	ACAT2	-	-	HGNC:94|MIM:100678|HPRD:00006	6	6q25.3	acetyl-CoA acetyltransferase 2	protein-coding	ACAT2	acetyl-CoA acetyltransferase 2	O	acetoacetyl Coenzyme A thiolase|acetyl-CoA acetyltransferase, cytosolic|acetyl-CoA transferase-like protein|cytosolic acetoacetyl-CoA thiolase	20130505
9606	40	ASIC2	-	ACCN|ACCN1|ASIC2a|BNC1|BNaC1|MDEG|hBNaC1	HGNC:99|MIM:601784|Ensembl:ENSG00000108684|HPRD:03471|Vega:OTTHUMG00000132885	17	17q12	acid-sensing (proton-gated) ion channel 2	protein-coding	ASIC2	acid-sensing (proton-gated) ion channel 2	O	acid-sensing ion channel 2|amiloride-sensitive cation channel 1, neuronal|brain sodium channel 1|mammalian degenerin homolog|neuronal amiloride-sensitive cation channel 1	20130505
9606	41	ASIC1	-	ACCN2|ASIC|BNaC2	HGNC:100|MIM:602866|Ensembl:ENSG00000110881|HPRD:04182|Vega:OTTHUMG00000169812	12	12q12	acid-sensing (proton-gated) ion channel 1	protein-coding	ASIC1	acid-sensing (proton-gated) ion channel 1	O	Cation channel, amiloride-sensitive, neuronal, 2|acid-sensing ion channel 1|acid-sensing ion channel 1a protein|amiloride-sensitive cation channel 2, neuronal|brain sodium channel 2	20130505
9606	43	ACHE	-	ACEE|ARACHE|N-ACHE|YT	HGNC:108|MIM:100740|Ensembl:ENSG00000087085|HPRD:00010|Vega:OTTHUMG00000157033	7	7q22	acetylcholinesterase	protein-coding	ACHE	acetylcholinesterase	O	Yt blood group|apoptosis-related acetylcholinesterase	20130505
9606	46	ACLS	-	-	HGNC:114|MIM:200990	12	12p13.3-p11.2	acrocallosal syndrome	unknown	ACLS	acrocallosal syndrome	O	-	20130226
9606	47	ACLY	-	ACL|ATPCL|CLATP	HGNC:115|MIM:108728|Ensembl:ENSG00000131473|HPRD:00155|Vega:OTTHUMG00000133507	17	17q21.2	ATP citrate lyase	protein-coding	ACLY	ATP citrate lyase	O	ATP citrate synthase|ATP-citrate (pro-S-)-lyase|ATP-citrate synthase|citrate cleavage enzyme	20130505
9606	48	ACO1	RP11-334P12.1	ACONS|IREB1|IREBP|IREBP1|IRP1	HGNC:117|MIM:100880|Ensembl:ENSG00000122729|HPRD:00013|Vega:OTTHUMG00000019740	9	9p21.1	aconitase 1, soluble	protein-coding	ACO1	aconitase 1, soluble	O	IRE-BP 1|aconitate hydratase|citrate hydro-lyase|cytoplasmic aconitate hydratase|ferritin repressor protein|iron regulatory protein 1|iron-responsive element binding protein 1|iron-responsive element-binding protein 1	20130505
9606	49	ACR	-	-	HGNC:126|MIM:102480|Ensembl:ENSG00000100312|HPRD:06342|Vega:OTTHUMG00000150155	22	22q13.33	acrosin	protein-coding	ACR	acrosin	O	acrosin light and heavy chain prepropeptide|preproacrosin|proacrosin	20130505
9606	50	ACO2	RP3-347H13.8	ACONM|ICRD	HGNC:118|MIM:100850|Ensembl:ENSG00000100412|HPRD:00012|Vega:OTTHUMG00000030544	22	22q13.2	aconitase 2, mitochondrial	protein-coding	ACO2	aconitase 2, mitochondrial	O	aconitate hydratase, mitochondrial|citrate hydro-lyase	20130505
9606	51	ACOX1	-	ACOX|PALMCOX|SCOX	HGNC:119|MIM:609751|Ensembl:ENSG00000161533|HPRD:02030|Vega:OTTHUMG00000180027	17	17q25.1	acyl-CoA oxidase 1, palmitoyl	protein-coding	ACOX1	acyl-CoA oxidase 1, palmitoyl	O	AOX|acyl-CoA oxidase, straight-chain|acyl-Coenzyme A oxidase 1, palmitoyl|palmitoyl-CoA oxidase|peroxisomal acyl-coenzyme A oxidase 1|peroxisomal fatty acyl-CoA oxidase|straight-chain acyl-CoA oxidase	20130505
9606	52	ACP1	-	HAAP	HGNC:122|MIM:171500|Ensembl:ENSG00000143727|HPRD:08881|Vega:OTTHUMG00000086933	2	2p25	acid phosphatase 1, soluble	protein-coding	ACP1	acid phosphatase 1, soluble	O	LMW-PTP|LMW-PTPase|acid phosphatase of erythrocyte|adipocyte acid phosphatase|cytoplasmic phosphotyrosyl protein phosphatase|low molecular weight cytosolic acid phosphatase|low molecular weight phosphotyrosine protein phosphatase|protein tyrosine phosphatase|red cell acid phosphatase 1	20130505
9606	53	ACP2	-	-	HGNC:123|MIM:171650|Ensembl:ENSG00000134575|HPRD:01375|Vega:OTTHUMG00000166949	11	11p11.2|11p12-p11	acid phosphatase 2, lysosomal	protein-coding	ACP2	acid phosphatase 2, lysosomal	O	LAP|lysosomal acid phosphatase	20130512
9606	54	ACP5	-	SPENCDI|TRAP	HGNC:124|MIM:171640|Ensembl:ENSG00000102575|HPRD:01374|Vega:OTTHUMG00000182036	19	19p13.2	acid phosphatase 5, tartrate resistant	protein-coding	ACP5	acid phosphatase 5, tartrate resistant	O	TrATPase|tartrate-resistant acid ATPase|tartrate-resistant acid phosphatase type 5	20130505
9606	55	ACPP	-	5'-NT|ACP-3|ACP3|PAP	HGNC:125|MIM:171790|Ensembl:ENSG00000014257|HPRD:01378|Vega:OTTHUMG00000159650	3	3q22.1	acid phosphatase, prostate	protein-coding	ACPP	acid phosphatase, prostate	O	5'-nucleotidase|TMPase|ecto-5'-nucleotidase|prostatic acid phosphatase|prostatic acid phosphotase|thiamine monophosphatase	20130505
9606	56	ACRV1	-	D11S4365|SP-10|SPACA2	HGNC:127|MIM:102525|Ensembl:ENSG00000134940|HPRD:00014|Vega:OTTHUMG00000165854	11	11q24.2	acrosomal vesicle protein 1	protein-coding	ACRV1	acrosomal vesicle protein 1	O	acrosomal protein SP-10|sperm protein 10	20130226
9606	58	ACTA1	RP5-1068B5.2	ACTA|ASMA|CFTD|CFTD1|CFTDM|MPFD|NEM1|NEM2|NEM3	HGNC:129|MIM:102610|Ensembl:ENSG00000143632|HPRD:00030|Vega:OTTHUMG00000038006	1	1q42.13	actin, alpha 1, skeletal muscle	protein-coding	ACTA1	actin, alpha 1, skeletal muscle	O	actin, alpha skeletal muscle|nemaline myopathy type 3	20130505
9606	59	ACTA2	GIG46	AAT6|ACTSA|MYMY5	HGNC:130|MIM:102620|Ensembl:ENSG00000107796|HPRD:00031|Vega:OTTHUMG00000018700	10	10q23.3	actin, alpha 2, smooth muscle, aorta	protein-coding	ACTA2	actin, alpha 2, smooth muscle, aorta	O	actin, aortic smooth muscle|alpha-cardiac actin|cell growth-inhibiting gene 46 protein	20130505
9606	60	ACTB	-	BRWS1|PS1TP5BP1	HGNC:132|MIM:102630|Ensembl:ENSG00000075624|HPRD:00032|Vega:OTTHUMG00000023268	7	7p22	actin, beta	protein-coding	ACTB	actin, beta	O	PS1TP5-binding protein 1|actin, cytoplasmic 1|beta cytoskeletal actin	20130512
9606	62	ACTBP2	-	-	HGNC:135	5	5q14.1	actin, beta pseudogene 2	pseudo	ACTBP2	actin, beta pseudogene 2	O	-	20130226
9606	63	ACTBP3	-	-	HGNC:136	18	18q21.33	actin, beta pseudogene 3	pseudo	ACTBP3	actin, beta pseudogene 3	O	-	20130226
9606	64	ACTBP4	-	-	HGNC:137	5	5q31.1	actin, beta pseudogene 4	pseudo	ACTBP4	actin, beta pseudogene 4	O	-	20130226
9606	66	ACTBP6	-	H8-PSI-BETA-AC3	HGNC:139	8	8q21.2	actin, beta pseudogene 6	pseudo	ACTBP6	actin, beta pseudogene 6	O	-	20130226
9606	67	ACTBP7	-	-	HGNC:140	15	15q15.3	actin, beta pseudogene 7	pseudo	ACTBP7	actin, beta pseudogene 7	O	-	20130226
9606	68	ACTBP8	-	ACTBP2	HGNC:141	6	6q15	actin, beta pseudogene 8	pseudo	ACTBP8	actin, beta pseudogene 8	O	-	20130226
9606	69	ACTBP9	-	-	HGNC:142	18	18q21.33	actin, beta pseudogene 9	pseudo	ACTBP9	actin, beta pseudogene 9	O	-	20130226
9606	70	ACTC1	-	ACTC|ASD5|CMD1R|CMH11|LVNC4	HGNC:143|MIM:102540|Ensembl:ENSG00000159251|HPRD:00015|Vega:OTTHUMG00000129675	15	15q14	actin, alpha, cardiac muscle 1	protein-coding	ACTC1	actin, alpha, cardiac muscle 1	O	actin, alpha cardiac muscle 1	20130505
9606	71	ACTG1	-	ACT|ACTG|BRWS2|DFNA20|DFNA26	HGNC:144|MIM:102560|Ensembl:ENSG00000184009|HPRD:00017|Vega:OTTHUMG00000177955	17	17q25	actin, gamma 1	protein-coding	ACTG1	actin, gamma 1	O	actin, cytoplasmic 2|cytoskeletal gamma-actin	20130505
9606	72	ACTG2	-	ACT|ACTA3|ACTE|ACTL3|ACTSG	HGNC:145|MIM:102545|Ensembl:ENSG00000163017|HPRD:00016|Vega:OTTHUMG00000129813	2	2p13.1	actin, gamma 2, smooth muscle, enteric	protein-coding	ACTG2	actin, gamma 2, smooth muscle, enteric	O	actin, gamma-enteric smooth muscle|actin-like protein|alpha-actin 3|alpha-actin-3|gamma-2-actin|smooth muscle gamma actin|smooth muscle gamma-actin	20130505
9606	73	ACTG1P1	-	ACT1GP1|ACTGP1|HY-psi-gamma-AC6	HGNC:146	3	3q23	actin, gamma 1 pseudogene 1	pseudo	ACTG1P1	actin, gamma 1 pseudogene 1	O	-	20130226
9606	74	ACTG1P2	-	ACTGP2|ACTL2	HGNC:147	Y	Yq11	actin, gamma 1 pseudogene 2	pseudo	ACTG1P2	actin, gamma 1 pseudogene 2	O	-	20130226
9606	75	ACTG1P3	-	ACTGP3|dJ545L17.4	HGNC:148	20	20p13	actin, gamma 1 pseudogene 3	pseudo	ACTG1P3	actin, gamma 1 pseudogene 3	O	-	20130226
9606	78	ACTG1P6	-	ACTGP6	HGNC:151	1	1p21	actin, gamma 1 pseudogene 6	pseudo	ACTG1P6	actin, gamma 1 pseudogene 6	O	-	20130226
9606	79	ACTG1P7	-	ACTGP7	HGNC:152	1	1p21	actin, gamma 1 pseudogene 7	pseudo	ACTG1P7	actin, gamma 1 pseudogene 7	O	-	20130226
9606	80	ACTG1P8	-	ACTGP8	HGNC:153	1	1p21	actin, gamma 1 pseudogene 8	pseudo	ACTG1P8	actin, gamma 1 pseudogene 8	O	-	20130226
9606	81	ACTN4	-	ACTININ-4|FSGS|FSGS1	HGNC:166|MIM:604638|HPRD:05222	19	19q13	actinin, alpha 4	protein-coding	ACTN4	actinin, alpha 4	O	F-actin cross-linking protein|actinin alpha4 isoform|alpha-actinin-4|focal segmental glomerulosclerosis 1|non-muscle alpha-actinin 4	20130505
9606	82	ACTG1P9	-	ACTGP9	HGNC:154	6	6p12.3	actin, gamma 1 pseudogene 9	pseudo	ACTG1P9	actin, gamma 1 pseudogene 9	O	-	20130226
9606	83	ACTG1P10	-	ACTGP10|ACTL1|ACTP1	HGNC:155	X	Xp11.22	actin, gamma 1 pseudogene 10	pseudo	ACTG1P10	actin, gamma 1 pseudogene 10	O	-	20130226
9606	86	ACTL6A	-	ACTL6|ARPN-BETA|Arp4|BAF53A|INO80K	HGNC:24124|MIM:604958|Ensembl:ENSG00000136518|HPRD:05389|Vega:OTTHUMG00000157782	3	3q26.33	actin-like 6A	protein-coding	ACTL6A	actin-like 6A	O	53 kDa BRG1-associated factor A|BAF complex 53 kDa subunit|BAF53|BRG1-associated factor 53A|INO80 complex subunit K|actin-like protein 6A|actin-related protein 4|actin-related protein Baf53a|arpNbeta|hArpN beta	20130505
9606	87	ACTN1	-	BDPLT15	HGNC:163|MIM:102575|Ensembl:ENSG00000072110|HPRD:00020|Vega:OTTHUMG00000171386	14	14q24|14q22-q24	actinin, alpha 1	protein-coding	ACTN1	actinin, alpha 1	O	F-actin cross-linking protein|actinin 1 smooth muscle|alpha-actinin cytoskeletal isoform|alpha-actinin-1|non-muscle alpha-actinin-1	20130510
9606	88	ACTN2	-	CMD1AA	HGNC:164|MIM:102573|Ensembl:ENSG00000077522|HPRD:00019|Vega:OTTHUMG00000040059	1	1q42-q43	actinin, alpha 2	protein-coding	ACTN2	actinin, alpha 2	O	F-actin cross-linking protein|alpha-actinin skeletal muscle|alpha-actinin-2	20130505
9606	89	ACTN3	-	-	HGNC:165|MIM:102574|Ensembl:ENSG00000248746|HPRD:02148|Vega:OTTHUMG00000160815	11	11q13.1	actinin, alpha 3	protein-coding	ACTN3	actinin, alpha 3	O	F-actin cross-linking protein|alpha-actinin skeletal muscle|alpha-actinin-3	20130505
9606	90	ACVR1	-	ACTRI|ACVR1A|ACVRLK2|ALK2|FOP|SKR1|TSRI	HGNC:171|MIM:102576|Ensembl:ENSG00000115170|HPRD:00021|Vega:OTTHUMG00000131967	2	2q23-q24	activin A receptor, type I	protein-coding	ACVR1	activin A receptor, type I	O	TGF-B superfamily receptor type I|activin A receptor, type II-like kinase 2|activin receptor type I|activin receptor type-1|activin receptor-like kinase 2|hydroxyalkyl-protein kinase|serine/threonine-protein kinase receptor R1	20130505
9606	91	ACVR1B	-	ACTRIB|ACVRLK4|ALK4|SKR2	HGNC:172|MIM:601300|Ensembl:ENSG00000135503|HPRD:03193|Vega:OTTHUMG00000167920	12	12q13	activin A receptor, type IB	protein-coding	ACVR1B	activin A receptor, type IB	O	activin A receptor, type II-like kinase 4|activin receptor type-1B|activin receptor-like kinase 4|serine/threonine-protein kinase receptor R2	20130505
9606	92	ACVR2A	-	ACTRII|ACVR2	HGNC:173|MIM:102581|Ensembl:ENSG00000121989|HPRD:00025|Vega:OTTHUMG00000150603	2	2q22.3	activin A receptor, type IIA	protein-coding	ACVR2A	activin A receptor, type IIA	O	activin receptor type-2A	20130505
9606	93	ACVR2B	-	ACTRIIB|ActR-IIB|HTX4	HGNC:174|MIM:602730|HPRD:04106	3	3p22	activin A receptor, type IIB	protein-coding	ACVR2B	activin A receptor, type IIB	O	activin receptor type-2B	20130505
9606	94	ACVRL1	-	ACVRLK1|ALK-1|ALK1|HHT|HHT2|ORW2|SKR3|TSR-I	HGNC:175|MIM:601284|Ensembl:ENSG00000139567|HPRD:03181|Vega:OTTHUMG00000169507	12	12q13.13	activin A receptor type II-like 1	protein-coding	ACVRL1	activin A receptor type II-like 1	O	TGF-B superfamily receptor type I|activin A receptor, type II-like kinase 1|serine/threonine-protein kinase receptor R3	20130505
9606	95	ACY1	-	ACY-1|ACY1D	HGNC:177|MIM:104620|Ensembl:ENSG00000114786|Ensembl:ENSG00000243989|HPRD:00092|Vega:OTTHUMG00000157815|Vega:OTTHUMG00000166447	3	3p21.1	aminoacylase 1	protein-coding	ACY1	aminoacylase 1	O	N-acyl-L-amino-acid amidohydrolase|acylase|aminoacylase-1	20130505
9606	97	ACYP1	-	ACYPE	HGNC:179|MIM:600875|Ensembl:ENSG00000119640|HPRD:02928|Vega:OTTHUMG00000171767	14	14q24.3	acylphosphatase 1, erythrocyte (common) type	protein-coding	ACYP1	acylphosphatase 1, erythrocyte (common) type	O	acylphosphatase, erythrocyte isozyme|acylphosphatase, organ-common type isozyme|acylphosphatase-1|acylphosphate phosphohydrolase 1	20130505
9606	98	ACYP2	-	ACYM|ACYP	HGNC:180|MIM:102595|Ensembl:ENSG00000170634|HPRD:00028|Vega:OTTHUMG00000129287	2	2p16.2	acylphosphatase 2, muscle type	protein-coding	ACYP2	acylphosphatase 2, muscle type	O	acylphosphatase, muscle type isozyme|acylphosphatase-2|acylphosphate phosphohydrolase 2	20130226
9606	100	ADA	-	-	HGNC:186|MIM:608958|Ensembl:ENSG00000196839|HPRD:00038|Vega:OTTHUMG00000033081	20	20q13.12	adenosine deaminase	protein-coding	ADA	adenosine deaminase	O	adenosine aminohydrolase	20130505
9606	101	ADAM8	-	CD156|MS2	HGNC:215|MIM:602267|Ensembl:ENSG00000151651|HPRD:03777|Vega:OTTHUMG00000019309	10	10q26.3	ADAM metallopeptidase domain 8	protein-coding	ADAM8	ADAM metallopeptidase domain 8	O	a disintegrin and metalloproteinase domain 8|cell surface antigen MS2|disintegrin and metalloproteinase domain-containing protein 8|human leukocyte differentiation antigen	20130512
9606	102	ADAM10	-	AD10|CD156c|HsT18717|MADM|kuz	HGNC:188|MIM:602192|HPRD:03723	15	15q22	ADAM metallopeptidase domain 10	protein-coding	ADAM10	ADAM metallopeptidase domain 10	O	ADAM 10|CDw156|a disintegrin and metalloprotease domain 10|a disintegrin and metalloproteinase domain 10|disintegrin and metalloproteinase domain-containing protein 10|kuzbanian protein homolog|mammalian disintegrin-metalloprotease	20130505
9606	103	ADAR	RP11-61L14.5	ADAR1|AGS6|DRADA|DSH|DSRAD|G1P1|IFI-4|IFI4|K88DSRBP|P136	HGNC:225|MIM:146920|Ensembl:ENSG00000160710|HPRD:07528|Vega:OTTHUMG00000037261	1	1q21.3	adenosine deaminase, RNA-specific	protein-coding	ADAR	adenosine deaminase, RNA-specific	O	136 kDa double-stranded RNA-binding protein|adenosine deaminase acting on RNA 1-A|double-stranded RNA-specific adenosine deaminase|dsRNA adenosine deaminase|interferon-induced protein 4|interferon-inducible protein 4	20130505
9606	104	ADARB1	-	ADAR2|DRABA2|DRADA2|RED1	HGNC:226|MIM:601218|Ensembl:ENSG00000197381|HPRD:06777|Vega:OTTHUMG00000090295	21	21q22.3	adenosine deaminase, RNA-specific, B1	protein-coding	ADARB1	adenosine deaminase, RNA-specific, B1	O	RED1 homolog|RNA editase|RNA editing deaminase 1|RNA-editing deaminase 1|RNA-editing enzyme 1|adenosine deaminase, RNA-specific, B1 (RED1 homolog rat)|adenosine deaminase, RNA-specific, B1 (homolog of rat RED1)|double-stranded RNA-specific editase 1|dsRNA adenosine deaminase DRADA2	20130505
9606	105	ADARB2	RP11-29A19.1	ADAR3|RED2	HGNC:227|MIM:602065|HPRD:09070	10	10p15.3	adenosine deaminase, RNA-specific, B2	protein-coding	ADARB2	adenosine deaminase, RNA-specific, B2	O	RED2 homolog|RNA-dependent adenosine deaminase 3|RNA-editing deaminase 2|RNA-editing enzyme 2|adenosine deaminase, RNA-specific, B2 (RED1 homolog rat)|adenosine deaminase, RNA-specific, B2 (RED2 homolog rat)|double-stranded RNA-specific editase B2|dsRNA adenosine deaminase B2|homolog of rat BLUE	20130505
9606	106	ADCP1	-	-	HGNC:229	6	-	adenosine deaminase complexing protein 1	unknown	ADCP1	adenosine deaminase complexing protein 1	O	-	20130226
9606	107	ADCY1	-	AC1	HGNC:232|MIM:103072|Ensembl:ENSG00000164742|HPRD:00053|Vega:OTTHUMG00000155420	7	7p13-p12	adenylate cyclase 1 (brain)	protein-coding	ADCY1	adenylate cyclase 1 (brain)	O	3',5'-cyclic AMP synthetase|ATP pyrophosphate-lyase 1|Ca(2+)/calmodulin-activated adenylyl cyclase|adenyl cyclase|adenylate cyclase type 1|adenylate cyclase type I|adenylyl cyclase 1	20130504
9606	108	ADCY2	-	AC2|HBAC2	HGNC:233|MIM:103071|Ensembl:ENSG00000078295|HPRD:00052|Vega:OTTHUMG00000090476	5	5p15.3	adenylate cyclase 2 (brain)	protein-coding	ADCY2	adenylate cyclase 2 (brain)	O	3',5'-cyclic AMP synthetase|ATP pyrophosphate-lyase 2|adenylate cyclase II|adenylate cyclase type 2|adenylate cyclase type II|adenylyl cyclase 2|type II adenylate cyclase	20130505
9606	109	ADCY3	-	AC3	HGNC:234|MIM:600291|Ensembl:ENSG00000138031|HPRD:02620|Vega:OTTHUMG00000094765	2	2p23.3	adenylate cyclase 3	protein-coding	ADCY3	adenylate cyclase 3	O	AC-III|ATP pyrophosphate-lyase 3|adenylate cyclase type 3|adenylate cyclase type III|adenylate cyclase, olfactive type|adenylyl cyclase 3|adenylyl cyclase, type III	20130505
9606	111	ADCY5	-	AC5|FDFM	HGNC:236|MIM:600293|Ensembl:ENSG00000173175|HPRD:08973|Vega:OTTHUMG00000159517	3	3q21.1	adenylate cyclase 5	protein-coding	ADCY5	adenylate cyclase 5	O	ATP pyrophosphate-lyase 5|adenylate cyclase type 5|adenylate cyclase type V|adenylyl cyclase 5	20130505
9606	112	ADCY6	-	AC6	HGNC:237|MIM:600294|Ensembl:ENSG00000174233|HPRD:02621|Vega:OTTHUMG00000170396	12	12q12-q13	adenylate cyclase 6	protein-coding	ADCY6	adenylate cyclase 6	O	ATP pyrophosphate-lyase 6|adenylate cyclase type 6|adenylate cyclase type VI|adenylyl cyclase 6|ca(2+)-inhibitable adenylyl cyclase	20130505
9606	113	ADCY7	-	AC7	HGNC:238|MIM:600385|Ensembl:ENSG00000121281|HPRD:02663|Vega:OTTHUMG00000133172	16	16q12.1	adenylate cyclase 7	protein-coding	ADCY7	adenylate cyclase 7	O	ATP pyrophosphate-lyase 7|adenylate cyclase type 7|adenylate cyclase type VII|adenylyl cyclase 7	20130505
9606	114	ADCY8	-	AC8|ADCY3|HBAC1	HGNC:239|MIM:103070|Ensembl:ENSG00000155897|HPRD:00051|Vega:OTTHUMG00000164756	8	8q24	adenylate cyclase 8 (brain)	protein-coding	ADCY8	adenylate cyclase 8 (brain)	O	ATP pyrophosphate-lyase 8|adenylate cyclase type 8|adenylate cyclase type VIII|adenylyl cyclase 8|adenylyl cyclase-8, brain|ca(2+)/calmodulin-activated adenylyl cyclase	20130505
9606	115	ADCY9	-	AC9	HGNC:240|MIM:603302|Ensembl:ENSG00000162104|HPRD:04489|Vega:OTTHUMG00000177612	16	16p13.3	adenylate cyclase 9	protein-coding	ADCY9	adenylate cyclase 9	O	ATP pyrophosphate-lyase 9|adenylate cyclase type 9|adenylate cyclase type IX|adenylyl cyclase 9|type IX ATP pyrophosphate-lyase	20130505
9606	116	ADCYAP1	-	PACAP	HGNC:241|MIM:102980|Ensembl:ENSG00000141433|HPRD:02369|Vega:OTTHUMG00000131479	18	18p11	adenylate cyclase activating polypeptide 1 (pituitary)	protein-coding	ADCYAP1	adenylate cyclase activating polypeptide 1 (pituitary)	O	pituitary adenylate cyclase-activating polypeptide|prepro-PACAP	20130505
9606	117	ADCYAP1R1	-	PAC1|PAC1R|PACAPR|PACAPRI	HGNC:242|MIM:102981|Ensembl:ENSG00000078549|HPRD:00045|Vega:OTTHUMG00000023884	7	7p14	adenylate cyclase activating polypeptide 1 (pituitary) receptor type I	protein-coding	ADCYAP1R1	adenylate cyclase activating polypeptide 1 (pituitary) receptor type I	O	PACAP receptor 1|PACAP type I receptor|PACAP-R1|pituitary adenylate cyclase activating polypeptide 1 receptor type I Hiphop|pituitary adenylate cyclase-activating polypeptide type I receptor	20130512
9606	118	ADD1	RP11-520M5.1	ADDA	HGNC:243|MIM:102680|Ensembl:ENSG00000087274|HPRD:00036|Vega:OTTHUMG00000122080	4	4p16.3	adducin 1 (alpha)	protein-coding	ADD1	adducin 1 (alpha)	O	alpha-adducin|erythrocyte adducin alpha subunit	20130505
9606	119	ADD2	-	ADDB	HGNC:244|MIM:102681|Ensembl:ENSG00000075340|HPRD:00037|Vega:OTTHUMG00000129710	2	2p13.3	adducin 2 (beta)	protein-coding	ADD2	adducin 2 (beta)	O	beta-adducin|erythrocyte adducin subunit beta	20130505
9606	120	ADD3	RP11-252O7.3	ADDL	HGNC:245|MIM:601568|Ensembl:ENSG00000148700|HPRD:03339|Vega:OTTHUMG00000019032	10	10q25.2	adducin 3 (gamma)	protein-coding	ADD3	adducin 3 (gamma)	O	adducin-like protein 70|gamma-adducin	20130505
9606	122	ADFN	-	ALDS	HGNC:247|MIM:300700	X	Xq25-q26|Xq26.3-q27.1	albinism-deafness syndrome	unknown	ADFN	albinism-deafness syndrome	O	-	20130226
9606	123	PLIN2	RP11-151J10.1	ADFP|ADRP	HGNC:248|MIM:103195|Ensembl:ENSG00000147872|HPRD:00057|Vega:OTTHUMG00000019624	9	9p22.1	perilipin 2	protein-coding	PLIN2	perilipin 2	O	adipophilin|adipose differentiation-related protein|perilipin-2	20130505
9606	124	ADH1A	-	ADH1	HGNC:249|MIM:103700|Ensembl:ENSG00000187758|HPRD:00063|Vega:OTTHUMG00000131026	4	4q23	alcohol dehydrogenase 1A (class I), alpha polypeptide	protein-coding	ADH1A	alcohol dehydrogenase 1A (class I), alpha polypeptide	O	ADH, alpha subunit|alcohol dehydrogenase 1 (class I), alpha polypeptide|alcohol dehydrogenase 1A|alcohol dehydrogenase subunit alpha|aldehyde reductase	20130505
9606	125	ADH1B	-	ADH2	HGNC:250|MIM:103720|HPRD:00065	4	4q23	alcohol dehydrogenase 1B (class I), beta polypeptide	protein-coding	ADH1B	alcohol dehydrogenase 1B (class I), beta polypeptide	O	ADH, beta subunit|alcohol dehydrogenase 1B|alcohol dehydrogenase 2 (class I), beta polypeptide|alcohol dehydrogenase subunit beta|aldehyde reductase	20130512
9606	126	ADH1C	-	ADH3	HGNC:251|MIM:103730|Ensembl:ENSG00000248144|HPRD:00066|Vega:OTTHUMG00000161422	4	4q23	alcohol dehydrogenase 1C (class I), gamma polypeptide	protein-coding	ADH1C	alcohol dehydrogenase 1C (class I), gamma polypeptide	O	ADH, gamma subunit|alcohol dehydrogenase 1C|alcohol dehydrogenase 3 (class I), gamma polypeptide|alcohol dehydrogenase subunit gamma|aldehyde reductase	20130504
9606	127	ADH4	-	ADH-2	HGNC:252|MIM:103740|Ensembl:ENSG00000198099|HPRD:00068|Vega:OTTHUMG00000161227	4	4q22	alcohol dehydrogenase 4 (class II), pi polypeptide	protein-coding	ADH4	alcohol dehydrogenase 4 (class II), pi polypeptide	O	alcohol dehydrogenase 4|alcohol dehydrogenase class II pi chain|aldehyde reductase	20130505
9606	128	ADH5	-	ADH-3|ADHX|FALDH|FDH|GSH-FDH|GSNOR	HGNC:253|MIM:103710|Ensembl:ENSG00000197894|HPRD:00064|Vega:OTTHUMG00000161230	4	4q23	alcohol dehydrogenase 5 (class III), chi polypeptide	protein-coding	ADH5	alcohol dehydrogenase 5 (class III), chi polypeptide	O	S-(hydroxymethyl)glutathione dehydrogenase|alcohol dehydrogenase (class III), chi polypeptide|alcohol dehydrogenase class chi chain|alcohol dehydrogenase class-3|alcohol dehydrogenase class-III|formaldehyde dehydrogenase|glutathione-dependent formaldehyde dehydrogenase	20130505
9606	130	ADH6	-	ADH-5	HGNC:255|MIM:103735|Ensembl:ENSG00000172955|HPRD:00067|Vega:OTTHUMG00000131024	4	4q23	alcohol dehydrogenase 6 (class V)	protein-coding	ADH6	alcohol dehydrogenase 6 (class V)	O	alcohol dehydrogenase 6|aldehyde reductase	20130505
9606	131	ADH7	-	ADH4	HGNC:256|MIM:600086|Ensembl:ENSG00000196344|HPRD:02515|Vega:OTTHUMG00000159318	4	4q23-q24	alcohol dehydrogenase 7 (class IV), mu or sigma polypeptide	protein-coding	ADH7	alcohol dehydrogenase 7 (class IV), mu or sigma polypeptide	O	alcohol dehydrogenase VII|alcohol dehydrogenase class 4 mu/sigma chain|alcohol dehydrogenase class IV mu/sigma chain|alcohol dehydrogenase-7|class IV sigma-1 alcohol dehydrogenase|class IV sigmasigma alcohol dehydrogenase|gastric alcohol dehydrogenase|retinol dehydrogenase	20130512
9606	132	ADK	-	AK	HGNC:257|MIM:102750|Ensembl:ENSG00000156110|HPRD:00039|Vega:OTTHUMG00000018506	10	10q22|10q11-q24	adenosine kinase	protein-coding	ADK	adenosine kinase	O	adenosine 5'-phosphotransferase	20130505
9606	133	ADM	-	AM	HGNC:259|MIM:103275|HPRD:00061	11	11p15.4	adrenomedullin	protein-coding	ADM	adrenomedullin	O	preproadrenomedullin	20130502
9606	134	ADORA1	-	RDC7	HGNC:262|MIM:102775|Ensembl:ENSG00000163485|HPRD:00042|Vega:OTTHUMG00000042125	1	1q32.1	adenosine A1 receptor	protein-coding	ADORA1	adenosine A1 receptor	O	adenosine receptor A1	20130505
9606	135	ADORA2A	-	ADORA2|RDC8|hA2aR	HGNC:263|MIM:102776|Ensembl:ENSG00000128271|HPRD:00043|Vega:OTTHUMG00000150761	22	22q11.23	adenosine A2a receptor	protein-coding	ADORA2A	adenosine A2a receptor	O	adenosine A2 receptor|adenosine receptor A2a|adenosine receptor subtype A2a	20130505
9606	136	ADORA2B	-	ADORA2	HGNC:264|MIM:600446|Ensembl:ENSG00000170425|HPRD:15971|Vega:OTTHUMG00000059140	17	17p12	adenosine A2b receptor	protein-coding	ADORA2B	adenosine A2b receptor	O	adenosine receptor A2b	20130505
9606	137	ADORA2BP1	-	ADORA2BP	HGNC:265	1	1q32	adenosine A2b receptor pseudogene 1	pseudo	ADORA2BP1	adenosine A2b receptor pseudogene 1	O	-	20130226
9606	140	ADORA3	RP11-552M11.7	A3AR|AD026|bA552M11.5	HGNC:268|MIM:600445|Ensembl:ENSG00000121933|HPRD:08984|HPRD:12424|Vega:OTTHUMG00000011957	1	1p13.2	adenosine A3 receptor	protein-coding	ADORA3	adenosine A3 receptor	O	adenosine receptor A3	20130505
9606	141	ADPRH	-	ARH1	HGNC:269|MIM:603081|Ensembl:ENSG00000144843|HPRD:04359|Vega:OTTHUMG00000159420	3	3q13.31-q13.33	ADP-ribosylarginine hydrolase	protein-coding	ADPRH	ADP-ribosylarginine hydrolase	O	ADP-ribose-L-arginine cleaving enzyme|[Protein ADP-ribosylarginine] hydrolase	20130505
9606	142	PARP1	RP11-125A15.2	ADPRT|ADPRT 1|ADPRT1|ARTD1|PARP|PARP-1|PPOL|pADPRT-1	HGNC:270|MIM:173870|Ensembl:ENSG00000143799|HPRD:01435|Vega:OTTHUMG00000037556	1	1q41-q42	poly (ADP-ribose) polymerase 1	protein-coding	PARP1	poly (ADP-ribose) polymerase 1	O	ADP-ribosyltransferase (NAD+; poly (ADP-ribose) polymerase)|ADP-ribosyltransferase NAD(+)|ADP-ribosyltransferase diphtheria toxin-like 1|NAD(+) ADP-ribosyltransferase 1|poly (ADP-ribose) polymerase family, member 1|poly [ADP-ribose] polymerase 1|poly(ADP-ribose) polymerase|poly(ADP-ribose) synthetase|poly(ADP-ribosyl)transferase|poly[ADP-ribose] synthase 1	20130512
9606	143	PARP4	RP11-169O17.2	ADPRTL1|ARTD4|PARP-4|PARPL|PH5P|VAULT3|VPARP|VWA5C|p193	HGNC:271|MIM:607519|Ensembl:ENSG00000102699|HPRD:09598|Vega:OTTHUMG00000016582	13	13q11	poly (ADP-ribose) polymerase family, member 4	protein-coding	PARP4	poly (ADP-ribose) polymerase family, member 4	O	193 kDa vault protein|ADP-ribosyltransferase (NAD+; poly (ADP-ribose) polymerase)-like 1|ADP-ribosyltransferase diphtheria toxin-like 4|H5 proline-rich|I-alpha-I-related|PARP-related|PARP-related/IalphaI-related H5/proline-rich|poly [ADP-ribose] polymerase 4|poly(ADP-ribose) synthetase|poly(ADP-ribosyl)transferase-like 1|vault poly(ADP-ribose) polymerase|vault protein, 193-kDa|von Willebrand fact…	20130505
9606	144	PARP1P1	-	ADPRTP1|PPOLP1	HGNC:275	13	13q34	poly (ADP-ribose) polymerase family, member 1 pseudogene 1	pseudo	PARP1P1	poly (ADP-ribose) polymerase family, member 1 pseudogene 1	O	-	20130226
9606	145	PARP1P2	-	ADPRTP2|PPOLP2	HGNC:276	14	14q22	poly (ADP-ribose) polymerase family, member 1 pseudogene 2	pseudo	PARP1P2	poly (ADP-ribose) polymerase family, member 1 pseudogene 2	O	-	20130226
9606	146	ADRA1D	-	ADRA1|ADRA1A|ADRA1R|ALPHA1|DAR|dJ779E11.2	HGNC:280|MIM:104219|Ensembl:ENSG00000171873|HPRD:00079|Vega:OTTHUMG00000031779	20	20p13	adrenoceptor alpha 1D	protein-coding	ADRA1D	adrenoceptor alpha 1D	O	adrenergic, alpha -1D-, receptor|adrenergic, alpha-1A-, receptor|adrenergic, alpha-1D-, receptor|alpha-1A adrenergic receptor|alpha-1D adrenergic receptor|alpha-1D adrenoceptor|alpha-1D adrenoreceptor|alpha-1D-adrenergic receptor|alpha-adrenergic receptor 1a	20130505
9606	147	ADRA1B	-	ADRA1|ALPHA1BAR	HGNC:278|MIM:104220|HPRD:00080	5	5q33.3	adrenoceptor alpha 1B	protein-coding	ADRA1B	adrenoceptor alpha 1B	O	adrenergic, alpha-1B-, receptor|alpha-1B adrenergic receptor|alpha-1B adrenoceptor|alpha-1B adrenoreceptor|alpha-1B-adrenergic receptor	20130505
9606	148	ADRA1A	-	ADRA1C|ADRA1L1|ALPHA1AAR	HGNC:277|MIM:104221|Ensembl:ENSG00000120907|HPRD:00081|Vega:OTTHUMG00000099459	8	8p21.2	adrenoceptor alpha 1A	protein-coding	ADRA1A	adrenoceptor alpha 1A	O	G protein coupled receptor|adrenergic, alpha-1A-, receptor variant 1|adrenergic, alpha-1A-, receptor variant 3|adrenergic, alpha-1A-, receptor variant 5|adrenergic, alpha-1A-, receptor variant 8|alpha-1A adrenergic receptor|alpha-1A adrenoceptor|alpha-1A adrenoreceptor|alpha-1C adrenergic receptor	20130427
9606	150	ADRA2A	-	ADRA2|ADRA2R|ADRAR|ALPHA2AAR|ZNF32	HGNC:281|MIM:104210|Ensembl:ENSG00000150594|HPRD:00078|Vega:OTTHUMG00000019050	10	10q25.2	adrenoceptor alpha 2A	protein-coding	ADRA2A	adrenoceptor alpha 2A	O	adrenergic, alpha-2A-, receptor|alpha-2 adrenergic receptor subtype C10|alpha-2-adrenergic receptor, platelet type|alpha-2A adrenergic receptor|alpha-2A adrenoceptor|alpha-2A adrenoreceptor|alpha-2AAR subtype C10	20130505
9606	151	ADRA2B	-	ADRA2L1|ADRA2RL1|ADRARL1|ALPHA2BAR|alpha-2BAR	HGNC:282|MIM:104260|Ensembl:ENSG00000222040|HPRD:00086|Vega:OTTHUMG00000154375	2	2q11.1	adrenoceptor alpha 2B	protein-coding	ADRA2B	adrenoceptor alpha 2B	O	ADRA2B adrenergic, alpha-2B-, receptor|G-protein coupled receptor|adrenergic receptor alpha 2B|adrenergic, alpha-2B-, receptor|alpha-2 adrenergic receptor subtype C2|alpha-2-adrenergic receptor-like 1|alpha-2B adrenergic receptor|alpha-2B adrenoceptor|alpha-2B adrenoreceptor	20130505
9606	152	ADRA2C	-	ADRA2L2|ADRA2RL2|ADRARL2|ALPHA2CAR	HGNC:283|MIM:104250|Ensembl:ENSG00000184160|HPRD:00085|Vega:OTTHUMG00000159830	4	4p16	adrenoceptor alpha 2C	protein-coding	ADRA2C	adrenoceptor alpha 2C	O	adrenergic, alpha-2C-, receptor|alpha-2 adrenergic receptor subtype C4|alpha-2C adrenergic receptor|alpha-2C adrenoceptor|alpha-2C adrenoreceptor|alpha-2C-adrenergic receptor|alpha-2CAR|alpha2-AR-C4	20130505
9606	153	ADRB1	-	ADRB1R|B1AR|BETA1AR|RHR	HGNC:285|MIM:109630|Ensembl:ENSG00000043591|HPRD:00181|Vega:OTTHUMG00000019079	10	10q25.3	adrenoceptor beta 1	protein-coding	ADRB1	adrenoceptor beta 1	O	adrenergic, beta-1-, receptor|beta-1 adrenergic receptor|beta-1 adrenoceptor|beta-1 adrenoreceptor	20130505
9606	154	ADRB2	-	ADRB2R|ADRBR|B2AR|BAR|BETA2AR	HGNC:286|MIM:109690|Ensembl:ENSG00000169252|HPRD:00187|Vega:OTTHUMG00000129933	5	5q31-q32	adrenoceptor beta 2, surface	protein-coding	ADRB2	adrenoceptor beta 2, surface	O	adrenergic, beta-2-, receptor, surface|beta-2 adrenergic receptor|beta-2 adrenoceptor|beta-2 adrenoreceptor|catecholamine receptor	20130505
9606	155	ADRB3	-	BETA3AR	HGNC:288|MIM:109691|Ensembl:ENSG00000188778|HPRD:00188|Vega:OTTHUMG00000164028	8	8p12	adrenoceptor beta 3	protein-coding	ADRB3	adrenoceptor beta 3	O	adrenergic, beta-3-, receptor|beta-3 adrenergic receptor|beta-3 adrenoceptor|beta-3 adrenoreceptor	20130505
9606	156	ADRBK1	-	BARK1|BETA-ARK1|GRK2	HGNC:289|MIM:109635|Ensembl:ENSG00000173020|HPRD:00182|Vega:OTTHUMG00000167104	11	11q13.1	adrenergic, beta, receptor kinase 1	protein-coding	ADRBK1	adrenergic, beta, receptor kinase 1	O	G-protein coupled receptor kinase 2|beta-ARK-1|beta-adrenergic receptor kinase 1	20130505
9606	157	ADRBK2	-	BARK2|GRK3	HGNC:290|MIM:109636|Ensembl:ENSG00000100077|HPRD:00183|Vega:OTTHUMG00000150280	22	22q12.1	adrenergic, beta, receptor kinase 2	protein-coding	ADRBK2	adrenergic, beta, receptor kinase 2	O	G-protein-coupled receptor kinase 3|beta-ARK-2|beta-adrenergic receptor kinase 2	20130505
9606	158	ADSL	RP5-1042K10.8	AMPS|ASASE|ASL	HGNC:291|MIM:608222|Ensembl:ENSG00000239900|HPRD:00049	22	22q13.2	adenylosuccinate lyase	protein-coding	ADSL	adenylosuccinate lyase	O	adenylosuccinase	20130505
9606	159	ADSS	RP11-518L10.4	ADEH|ADSS 2	HGNC:292|MIM:103060|Ensembl:ENSG00000035687|HPRD:00050|Vega:OTTHUMG00000040102	1	1q44	adenylosuccinate synthase	protein-coding	ADSS	adenylosuccinate synthase	O	AMPSase 2|IMP--aspartate ligase 2|L-type adenylosuccinate synthetase|adenylosuccinate synthetase (Ade(-)H-complementing)|adenylosuccinate synthetase isozyme 2|adenylosuccinate synthetase, acidic isozyme|adenylosuccinate synthetase, liver isozyme	20130505
9606	160	AP2A1	-	ADTAA|AP2-ALPHA|CLAPA1	HGNC:561|MIM:601026|Ensembl:ENSG00000196961|HPRD:03016|Vega:OTTHUMG00000183253	19	19q13.33	adaptor-related protein complex 2, alpha 1 subunit	protein-coding	AP2A1	adaptor-related protein complex 2, alpha 1 subunit	O	100 kDa coated vesicle protein A|AP-2 complex subunit alpha-1|adapter-related protein complex 2 alpha-1 subunit|adaptin, alpha A|adaptor protein complex AP-2 subunit alpha-1|alpha-adaptin A|alpha1-adaptin|clathrin assembly protein complex 2 alpha-A large chain|clathrin-associated/assembly/adaptor protein, large, alpha 1|plasma membrane adaptor HA2/AP2 adaptin alpha A subunit	20130505
9606	161	AP2A2	-	ADTAB|CLAPA2|HIP-9|HIP9|HYPJ	HGNC:562|MIM:607242|Ensembl:ENSG00000183020|HPRD:06256|Vega:OTTHUMG00000165627	11	11p15.5	adaptor-related protein complex 2, alpha 2 subunit	protein-coding	AP2A2	adaptor-related protein complex 2, alpha 2 subunit	O	100 kDa coated vesicle protein C|AP-2 complex subunit alpha-2|adaptin, alpha B|alpha-adaptin C; Huntingtin interacting protein J|alpha2-adaptin|clathrin assembly protein complex 2 alpha-C large chain|clathrin-associated/assembly/adaptor protein, large, alpha 2|huntingtin yeast partner J|huntingtin-interacting protein 9|plasma membrane adaptor HA2/AP2 adaptin alpha C subunit	20130505
9606	162	AP1B1	-	ADTB1|AP105A|BAM22|CLAPB2	HGNC:554|MIM:600157|Ensembl:ENSG00000100280|HPRD:02541|Vega:OTTHUMG00000151109	22	22q12.2	adaptor-related protein complex 1, beta 1 subunit	protein-coding	AP1B1	adaptor-related protein complex 1, beta 1 subunit	O	AP-1 complex subunit beta-1|Golgi adaptor HA1/AP1 adaptin beta subunit|adapter-related protein complex 1 subunit beta-1|adaptor protein complex AP-1 subunit beta-1|beta-1-adaptin|beta-adaptin 1|beta-prime-adaptin|beta1-adaptin|clathrin assembly protein complex 1 beta large chain|plasma membrane adaptor HA2/AP2 adaptor beta subunit	20130505
9606	163	AP2B1	-	ADTB2|AP105B|AP2-BETA|CLAPB1	HGNC:563|MIM:601025|Ensembl:ENSG00000006125|HPRD:03015|Vega:OTTHUMG00000179924	17	17q11.2-q12	adaptor-related protein complex 2, beta 1 subunit	protein-coding	AP2B1	adaptor-related protein complex 2, beta 1 subunit	O	AP-2 complex subunit beta|adapter-related protein complex 2 beta subunit|adaptin, beta 2 (beta)|adaptor protein complex AP-2 subunit beta|beta-2-adaptin|beta-adaptin|clathrin assembly protein complex 2 beta large chain|clathrin-associated/assembly/adaptor protein, large, beta 1|plasma membrane adaptor HA2/AP2 adaptin beta subunit	20130505
9606	164	AP1G1	-	ADTG|CLAPG1	HGNC:555|MIM:603533|Ensembl:ENSG00000166747|HPRD:04637|Vega:OTTHUMG00000176871	16	16q23	adaptor-related protein complex 1, gamma 1 subunit	protein-coding	AP1G1	adaptor-related protein complex 1, gamma 1 subunit	O	AP-1 complex subunit gamma-1|adapter-related protein complex 1 subunit gamma-1|adaptor protein complex AP-1 subunit gamma-1|clathrin assembly protein complex 1 gamma large chain|clathrin assembly protein complex 1 gamma-1 large chain|clathrin-associated/assembly/adaptor protein, large, gamma 1|gamma adaptin|gamma1-adaptin|golgi adaptor HA1/AP1 adaptin gamma subunit|golgi adaptor HA1/AP1 adaptin s…	20130505
9606	165	AEBP1	-	ACLP	HGNC:303|MIM:602981|Ensembl:ENSG00000106624|HPRD:04281|Vega:OTTHUMG00000023362	7	7p13	AE binding protein 1	protein-coding	AEBP1	AE binding protein 1	O	adipocyte enhancer-binding protein 1|aortic carboxypeptidase-like protein	20130510
9606	166	AES	-	AES-1|AES-2|ESP1|GRG|GRG5|TLE5	HGNC:307|MIM:600188|Ensembl:ENSG00000104964|HPRD:02556|Vega:OTTHUMG00000180567	19	19p13.3	amino-terminal enhancer of split	protein-coding	AES	amino-terminal enhancer of split	O	gp130-associated protein GAM	20130505
9606	167	CRISP1	-	AEGL1|ARP|CRISP-1|HSCRISP1D|HSCRISP1G|HUMARP	HGNC:304|MIM:601193|Ensembl:ENSG00000124812|HPRD:03118|Vega:OTTHUMG00000014827	6	6p21.3	cysteine-rich secretory protein 1	protein-coding	CRISP1	cysteine-rich secretory protein 1	O	AEG-like protein|AEG-related protein|acidic epididymal glycoprotein homolog|acidic epididymal glycoprotein-like 1|cysteine-rich secretory protein-1 delta	20130226
9606	169	AF8T	-	-	HGNC:309|MIM:116950	3	-	AF8 temperature sensitivity complementing	unknown	AF8T	AF8 temperature sensitivity complementing	O	-	20130226
9606	170	AFA	-	-	HGNC:310|MIM:106250	-	-	ankyloblepharon filiforme adnatum	unknown	AFA	ankyloblepharon filiforme adnatum	O	-	20130226
9606	171	AFD1	-	AFDN	HGNC:312|MIM:154400	9	9q32	acrofacial dysostosis 1, Nager type	unknown	AFD1	acrofacial dysostosis 1, Nager type	O	-	20130226
9606	172	AFG3L1P	-	AFG3|AFG3L1	HGNC:314|MIM:603020|Ensembl:ENSG00000223959|HPRD:04315	16	16q24.3	AFG3 ATPase family member 3-like 1 (S. cerevisiae), pseudogene	pseudo	AFG3L1P	AFG3 ATPase family member 3-like 1 (S. cerevisiae), pseudogene	O	-	20130505
9606	173	AFM	-	ALB2|ALBA|ALF	HGNC:316|MIM:104145|Ensembl:ENSG00000079557|HPRD:00073|Vega:OTTHUMG00000130004	4	4q13.3	afamin	protein-coding	AFM	afamin	O	alpha-Alb|alpha-albumin	20130319
9606	174	AFP	-	FETA|HPAFP	HGNC:317|MIM:104150|Ensembl:ENSG00000081051|HPRD:00074|Vega:OTTHUMG00000130011	4	4q13.3	alpha-fetoprotein	protein-coding	AFP	alpha-fetoprotein	O	alpha-1-fetoprotein|alpha-fetoglobulin	20130512
9606	175	AGA	-	AGU|ASRG|GA	HGNC:318|MIM:613228|Ensembl:ENSG00000038002|HPRD:01949|Vega:OTTHUMG00000160723	4	4q34.3	aspartylglucosaminidase	protein-coding	AGA	aspartylglucosaminidase	O	N(4)-(beta-N-acetylglucosaminyl)-L-asparaginase|N4-(N-acetyl-beta-glucosaminyl)-L-asparagine amidase|aspartylglucosylamine deaspartylase|glycosylasparaginase	20130505
9606	176	ACAN	-	AGC1|AGCAN|CSPG1|CSPGCP|MSK16|SEDK	HGNC:319|MIM:155760|Ensembl:ENSG00000157766|HPRD:01123|Vega:OTTHUMG00000171989	15	15q26.1	aggrecan	protein-coding	ACAN	aggrecan	O	aggrecan core protein|cartilage-specific proteoglycan core protein|chondroitin sulfate proteoglycan core protein 1|large aggregating proteoglycan	20130505
9606	177	AGER	DAMA-358M23.4	RAGE	HGNC:320|MIM:600214|Ensembl:ENSG00000204305|HPRD:02568|Vega:OTTHUMG00000031120	6	6p21.3	advanced glycosylation end product-specific receptor	protein-coding	AGER	advanced glycosylation end product-specific receptor	O	RAGE isoform NtRAGE-delta|RAGE isoform sRAGE-delta	20130512
9606	178	AGL	-	GDE	HGNC:321|MIM:610860|Ensembl:ENSG00000162688|HPRD:01984|Vega:OTTHUMG00000010803	1	1p21	amylo-alpha-1, 6-glucosidase, 4-alpha-glucanotransferase	protein-coding	AGL	amylo-alpha-1, 6-glucosidase, 4-alpha-glucanotransferase	O	amylo-1, 6-glucosidase, 4-alpha-glucanotransferase|glycogen debrancher|glycogen debranching enzyme	20130505
9606	179	AGMX2	-	IMD6|XLA2	HGNC:323|MIM:300310	X	Xp22	agammaglobulinemia, X-linked 2 (with growth hormone deficiency)	unknown	AGMX2	agammaglobulinemia, X-linked 2 (with growth hormone deficiency)	O	-	20130226
9606	181	AGRP	-	AGRT|ART|ASIP2	HGNC:330|MIM:602311|Ensembl:ENSG00000159723|HPRD:09079|Vega:OTTHUMG00000137509	16	16q22	agouti related protein homolog (mouse)	protein-coding	AGRP	agouti related protein homolog (mouse)	O	agouti-related protein	20130505
9606	182	JAG1	-	AGS|AHD|AWS|CD339|HJ1|JAGL1	HGNC:6188|MIM:601920|Ensembl:ENSG00000101384|HPRD:03562|Vega:OTTHUMG00000031872	20	20p12.1-p11.23	jagged 1	protein-coding	JAG1	jagged 1	O	protein jagged-1	20130505
9606	183	AGT	-	ANHU|SERPINA8	HGNC:333|MIM:106150|Ensembl:ENSG00000135744|HPRD:00106|Vega:OTTHUMG00000037757	1	1q42.2	angiotensinogen (serpin peptidase inhibitor, clade A, member 8)	protein-coding	AGT	angiotensinogen (serpin peptidase inhibitor, clade A, member 8)	O	alpha-1 antiproteinase, antitrypsin|angiotensin I|angiotensin II|angiotensinogen|pre-angiotensinogen|serine (or cysteine) proteinase inhibitor|serpin A8	20130505
9606	185	AGTR1	-	AG2S|AGTR1A|AGTR1B|AT1|AT1AR|AT1B|AT1BR|AT1R|AT2R1|AT2R1A|AT2R1B|HAT1R	HGNC:336|MIM:106165|Ensembl:ENSG00000144891|HPRD:00107|Vega:OTTHUMG00000159503	3	3q24	angiotensin II receptor, type 1	protein-coding	AGTR1	angiotensin II receptor, type 1	O	type-1 angiotensin II receptor|type-1B angiotensin II receptor	20130505
9606	186	AGTR2	-	AT2|ATGR2|MRX88	HGNC:338|MIM:300034|Ensembl:ENSG00000180772|HPRD:02071|Vega:OTTHUMG00000022243	X	Xq22-q23	angiotensin II receptor, type 2	protein-coding	AGTR2	angiotensin II receptor, type 2	O	angiotensin II type-2 receptor|type-2 angiotensin II receptor	20130505
9606	187	APLNR	-	AGTRL1|APJ|APJR|HG11	HGNC:339|MIM:600052|HPRD:02503	11	11q12	apelin receptor	protein-coding	APLNR	apelin receptor	O	APJ (apelin) receptor|APJ receptor|G protein-coupled receptor APJ|G-protein coupled receptor APJ|G-protein coupled receptor HG11|HG11 orphan receptor|angiotensin II receptor-like 1|angiotensin receptor-like 1	20130226
9606	189	AGXT	-	AGT|AGT1|AGXT1|PH1|SPAT|SPT|TLH6	HGNC:341|MIM:604285|Ensembl:ENSG00000172482|HPRD:05048|Vega:OTTHUMG00000133354	2	2q37.3	alanine-glyoxylate aminotransferase	protein-coding	AGXT	alanine-glyoxylate aminotransferase	O	L-alanine: glyoxylate aminotransferase 1|alanine--glyoxylate aminotransferase|hepatic peroxisomal alanine:glyoxylate aminotransferase|serine--pyruvate aminotransferase|serine-pyruvate aminotransferase|serine:pyruvate aminotransferase	20130505
9606	190	NR0B1	-	AHC|AHCH|AHX|DAX-1|DAX1|DSS|GTD|HHG|NROB1|SRXY2	HGNC:7960|MIM:300473|HPRD:08362	X	Xp21.3	nuclear receptor subfamily 0, group B, member 1	protein-coding	NR0B1	nuclear receptor subfamily 0, group B, member 1	O	DSS-AHC critical region on the X chromosome protein 1|nuclear hormone receptor|nuclear receptor DAX-1|nuclear receptor DAX1|nuclear receptor subfamily 0 group B member 1	20130512
9606	191	AHCY	-	SAHH|adoHcyase	HGNC:343|MIM:180960|Ensembl:ENSG00000101444|HPRD:01621|Vega:OTTHUMG00000140098	20	20q11.22	adenosylhomocysteinase	protein-coding	AHCY	adenosylhomocysteinase	O	S-adenosyl-L-homocysteine hydrolase|S-adenosylhomocysteine hydrolase	20130505
9606	192	AIC	-	-	HGNC:350|MIM:304050	X	Xp22	Aicardi syndrome	unknown	AIC	Aicardi syndrome	O	-	20130226
9606	196	AHR	-	bHLHe76	HGNC:348|MIM:600253|Ensembl:ENSG00000106546|HPRD:02596|Vega:OTTHUMG00000149967	7	7p15	aryl hydrocarbon receptor	protein-coding	AHR	aryl hydrocarbon receptor	O	AH-receptor|ah receptor|aromatic hydrocarbon receptor|class E basic helix-loop-helix protein 76	20130505
9606	197	AHSG	PRO2743	A2HS|AHS|FETUA|HSGA	HGNC:349|MIM:138680|Ensembl:ENSG00000145192|HPRD:00727|Vega:OTTHUMG00000156605	3	3q27	alpha-2-HS-glycoprotein	protein-coding	AHSG	alpha-2-HS-glycoprotein	O	alpha-2-Z-globulin|ba-alpha-2-glycoprotein|fetuin-A	20130505
9606	199	AIF1	DADB-70P7.8	AIF-1|IBA1|IRT-1|IRT1	HGNC:352|MIM:601833|Ensembl:ENSG00000204472|HPRD:03496|Vega:OTTHUMG00000031246	6	6p21.3	allograft inflammatory factor 1	protein-coding	AIF1	allograft inflammatory factor 1	O	allograft inflammatory factor-1 splice variant Hara-1|interferon gamma responsive transcript|ionized calcium-binding adapter molecule 1|protein G1	20130505
9606	201	AIH3	-	-	HGNC:355|MIM:301201	X	Xq22-q28	amelogenesis imperfecta 3, hypomaturation or hypoplastic type	unknown	AIH3	amelogenesis imperfecta 3, hypomaturation or hypoplastic type	O	-	20130226
9606	202	AIM1	RP11-294H11.2	CRYBG1|ST4	HGNC:356|MIM:601797|Ensembl:ENSG00000112297|HPRD:18576|Vega:OTTHUMG00000015302	6	6q21	absent in melanoma 1	protein-coding	AIM1	absent in melanoma 1	O	absent in melanoma 1 protein|beta-gamma crystallin domain containing 1|beta/gamma crystallin domain-containing protein 1|suppression of tumorigenicity 4 (malignant melanoma)	20130505
9606	203	AK1	RP11-203J24.1	-	HGNC:361|MIM:103000|Ensembl:ENSG00000106992|HPRD:00046|Vega:OTTHUMG00000020722	9	9q34.1	adenylate kinase 1	protein-coding	AK1	adenylate kinase 1	O	AK 1|ATP-AMP transphosphorylase 1|ATP:AMP phosphotransferase|adenylate kinase isoenzyme 1|adenylate monophosphate kinase|myokinase	20130512
9606	204	AK2	-	ADK2|AK 2	HGNC:362|MIM:103020|Ensembl:ENSG00000004455|HPRD:00047|Vega:OTTHUMG00000004131	1	1p34	adenylate kinase 2	protein-coding	AK2	adenylate kinase 2	O	ATP-AMP transphosphorylase 2|ATP:AMP phosphotransferase|adenylate kinase 2, mitochondrial|adenylate kinase isoenzyme 2, mitochondrial|adenylate monophosphate kinase	20130512
9606	205	AK4	RP4-686B20.1	AK 4|AK3|AK3L1|AK3L2	HGNC:363|MIM:103030|Ensembl:ENSG00000162433|HPRD:00048|Vega:OTTHUMG00000009033	1	1p31.3	adenylate kinase 4	protein-coding	AK4	adenylate kinase 4	O	ATP-AMP transphosphorylase|GTP:AMP phosphotransferase|GTP:AMP phosphotransferase AK4, mitochondrial|adenylate kinase 3-like 1|adenylate kinase isoenzyme 4|adenylate kinase isoenzyme 4, mitochondrial|mitochondrial adenylate kinase-3|nucleoside-triphosphate-adenylate kinase	20130512
9606	206	AK4P1	-	AK3P1	HGNC:364	17	17q11.2	adenylate kinase 4 pseudogene 1	pseudo	AK4P1	adenylate kinase 4 pseudogene 1	O	-	20130226
9606	207	AKT1	-	AKT|CWS6|PKB|PKB-ALPHA|PRKBA|RAC|RAC-ALPHA	HGNC:391|MIM:164730|Ensembl:ENSG00000142208|HPRD:01261|Vega:OTTHUMG00000170795	14	14q32.32	v-akt murine thymoma viral oncogene homolog 1	protein-coding	AKT1	v-akt murine thymoma viral oncogene homolog 1	O	PKB alpha|RAC-PK-alpha|RAC-alpha serine/threonine-protein kinase|protein kinase B alpha|proto-oncogene c-Akt|rac protein kinase alpha	20130512
9606	208	AKT2	-	HIHGHH|PKBB|PKBBETA|PRKBB|RAC-BETA	HGNC:392|MIM:164731|Ensembl:ENSG00000105221|HPRD:01262|Vega:OTTHUMG00000137375	19	19q13.1-q13.2	v-akt murine thymoma viral oncogene homolog 2	protein-coding	AKT2	v-akt murine thymoma viral oncogene homolog 2	O	PKB beta|RAC-PK-beta|RAC-beta serine/threonine-protein kinase|murine thymoma viral (v-akt) homolog-2|protein kinase Akt-2|protein kinase B beta|rac protein kinase beta	20130512
9606	210	ALAD	RP11-10I9.1	ALADH|PBGS	HGNC:395|MIM:125270|Ensembl:ENSG00000148218|HPRD:00504|Vega:OTTHUMG00000020522	9	9q33.1	aminolevulinate dehydratase	protein-coding	ALAD	aminolevulinate dehydratase	O	aminolevulinate, delta-, dehydratase|delta-aminolevulinic acid dehydratase|porphobilinogen synthase	20130505
9606	211	ALAS1	OK/SW-cl.121	ALAS|ALAS3|ALASH|MIG4	HGNC:396|MIM:125290|Ensembl:ENSG00000023330|HPRD:00505|Vega:OTTHUMG00000158108	3	3p21.1	aminolevulinate, delta-, synthase 1	protein-coding	ALAS1	aminolevulinate, delta-, synthase 1	O	5-aminolevulinate synthase, nonspecific, mitochondrial|5-aminolevulinic acid synthase 1|ALAS-H|delta-ALA synthase 1|delta-aminolevulinate synthase 1|migration-inducing protein 4	20130505
9606	212	ALAS2	RP5-884M20.1	ALAS-E|ALASE|ANH1|ASB|XLDPP|XLEPP|XLSA	HGNC:397|MIM:301300|Ensembl:ENSG00000158578|HPRD:02356|Vega:OTTHUMG00000021641	X	Xp11.21	aminolevulinate, delta-, synthase 2	protein-coding	ALAS2	aminolevulinate, delta-, synthase 2	O	5-aminolevulinate synthase, erythroid-specific, mitochondrial|5-aminolevulinic acid synthase 2|delta-ALA synthase 2|delta-ALA synthetase|delta-aminolevulinate synthase 2	20130505
9606	213	ALB	GIG20	PRO0883|PRO0903|PRO1341	HGNC:399|MIM:103600|Ensembl:ENSG00000163631|HPRD:00062|Vega:OTTHUMG00000129919	4	4q13.3	albumin	protein-coding	ALB	albumin	O	albumin (32 AA)|albumin (AA 34)|cell growth inhibiting protein 42|growth-inhibiting protein 20|serum albumin	20130505
9606	214	ALCAM	-	CD166|MEMD	HGNC:400|MIM:601662|Ensembl:ENSG00000170017|HPRD:03389|Vega:OTTHUMG00000159192	3	3q13.1	activated leukocyte cell adhesion molecule	protein-coding	ALCAM	activated leukocyte cell adhesion molecule	O	CD166 antigen	20130505
9606	215	ABCD1	-	ABC42|ALD|ALDP|AMN	HGNC:61|MIM:300371|Ensembl:ENSG00000101986|HPRD:02300|Vega:OTTHUMG00000024215	X	Xq28	ATP-binding cassette, sub-family D (ALD), member 1	protein-coding	ABCD1	ATP-binding cassette, sub-family D (ALD), member 1	O	ATP-binding cassette sub-family D member 1|adrenoleukodystrophy protein	20130505
9606	216	ALDH1A1	RP11-151D14.2	ALDC|ALDH-E1|ALDH1|ALDH11|PUMB1|RALDH1	HGNC:402|MIM:100640|Ensembl:ENSG00000165092|HPRD:00001|Vega:OTTHUMG00000020019	9	9q21.13	aldehyde dehydrogenase 1 family, member A1	protein-coding	ALDH1A1	aldehyde dehydrogenase 1 family, member A1	O	ALDH class 1|ALHDII|RALDH 1|acetaldehyde dehydrogenase 1|aldehyde dehydrogenase 1, soluble|aldehyde dehydrogenase, liver cytosolic|retinal dehydrogenase 1|retinaldehyde dehydrogenase 1	20130505
9606	217	ALDH2	-	ALDH-E2|ALDHI|ALDM	HGNC:404|MIM:100650|Ensembl:ENSG00000111275|HPRD:00003|Vega:OTTHUMG00000169603	12	12q24.2	aldehyde dehydrogenase 2 family (mitochondrial)	protein-coding	ALDH2	aldehyde dehydrogenase 2 family (mitochondrial)	O	ALDH class 2|acetaldehyde dehydrogenase 2|aldehyde dehydrogenase, mitochondrial|liver mitochondrial ALDH|nucleus-encoded mitochondrial aldehyde dehydrogenase 2	20130512
9606	218	ALDH3A1	-	ALDH3|ALDHIII	HGNC:405|MIM:100660|Ensembl:ENSG00000108602|HPRD:00004|Vega:OTTHUMG00000059469	17	17p11.2	aldehyde dehydrogenase 3 family, member A1	protein-coding	ALDH3A1	aldehyde dehydrogenase 3 family, member A1	O	aldehyde dehydrogenase isozyme 3|aldehyde dehydrogenase type III|aldehyde dehydrogenase, dimeric NADP-preferring|stomach aldehyde dehydrogenase	20130505
9606	219	ALDH1B1	-	ALDH5|ALDHX	HGNC:407|MIM:100670|Ensembl:ENSG00000137124|HPRD:00005|Vega:OTTHUMG00000019938	9	9p11.1	aldehyde dehydrogenase 1 family, member B1	protein-coding	ALDH1B1	aldehyde dehydrogenase 1 family, member B1	O	ALDH class 2|acetaldehyde dehydrogenase 5|aldehyde dehydrogenase 5|aldehyde dehydrogenase X, mitochondrial	20130505
9606	220	ALDH1A3	-	ALDH1A6|ALDH6|MCOP8|RALDH3	HGNC:409|MIM:600463|Ensembl:ENSG00000184254|HPRD:02713|Vega:OTTHUMG00000149870	15	15q26.3	aldehyde dehydrogenase 1 family, member A3	protein-coding	ALDH1A3	aldehyde dehydrogenase 1 family, member A3	O	RALDH-3|acetaldehyde dehydrogenase 6|aldehyde dehydrogenase 6|aldehyde dehydrogenase family 1 member A3|retinaldehyde dehydrogenase 3	20130505
9606	221	ALDH3B1	-	ALDH4|ALDH7	HGNC:410|MIM:600466|HPRD:02716	11	11q13	aldehyde dehydrogenase 3 family, member B1	protein-coding	ALDH3B1	aldehyde dehydrogenase 3 family, member B1	O	aldehyde dehydrogenase 3B1|aldehyde dehydrogenase 7|aldehyde dehydrogenase family 3 member B1	20130505
9606	222	ALDH3B2	-	ALDH8	HGNC:411|MIM:601917|Ensembl:ENSG00000132746|HPRD:03559|Vega:OTTHUMG00000167284	11	11q13	aldehyde dehydrogenase 3 family, member B2	protein-coding	ALDH3B2	aldehyde dehydrogenase 3 family, member B2	O	acetaldehyde dehydrogenase 8|aldehyde dehydrogenase 8|aldehyde dehydrogenase family 3 member B2	20130505
9606	223	ALDH9A1	-	ALDH4|ALDH7|ALDH9|E3|TMABADH	HGNC:412|MIM:602733|Ensembl:ENSG00000143149|HPRD:04109|Vega:OTTHUMG00000034677	1	1q23.1	aldehyde dehydrogenase 9 family, member A1	protein-coding	ALDH9A1	aldehyde dehydrogenase 9 family, member A1	O	4-trimethylaminobutyraldehyde dehydrogenase|R-aminobutyraldehyde dehydrogenase|aldehyde dehydrogenase (NAD+)|aldehyde dehydrogenase E3 isozyme|aldehyde dehydrogenase family 9 member A1|gamma-aminobutyraldehyde dehydrogenase	20130505
9606	224	ALDH3A2	-	ALDH10|FALDH|SLS	HGNC:403|MIM:609523|Ensembl:ENSG00000072210|HPRD:07188|Vega:OTTHUMG00000059471	17	17p11.2	aldehyde dehydrogenase 3 family, member A2	protein-coding	ALDH3A2	aldehyde dehydrogenase 3 family, member A2	O	aldehyde dehydrogenase 10|aldehyde dehydrogenase family 3 member A2|fatty aldehyde dehydrogenase|microsomal aldehyde dehydrogenase	20130505
9606	225	ABCD2	-	ABC39|ALDL1|ALDR|ALDRP|hALDR	HGNC:66|MIM:601081|HPRD:03051	12	12q12	ATP-binding cassette, sub-family D (ALD), member 2	protein-coding	ABCD2	ATP-binding cassette, sub-family D (ALD), member 2	O	ATP-binding cassette sub-family D member 2|adrenoleukodystrophy-like 1|adrenoleukodystrophy-related protein	20130505
9606	226	ALDOA	-	ALDA|GSD12	HGNC:414|MIM:103850|Ensembl:ENSG00000149925|HPRD:00070|Vega:OTTHUMG00000132107	16	16p11.2	aldolase A, fructose-bisphosphate	protein-coding	ALDOA	aldolase A, fructose-bisphosphate	O	fructose-1,6-bisphosphate triosephosphate-lyase|fructose-bisphosphate aldolase A|lung cancer antigen NY-LU-1|muscle-type aldolase	20130505
9606	228	ALDOAP2	-	-	HGNC:416	10	10q26.13	aldolase A, fructose-bisphosphate pseudogene 2	pseudo	ALDOAP2	aldolase A, fructose-bisphosphate pseudogene 2	O	-	20130226
9606	229	ALDOB	RP11-490D19.1	ALDB|ALDO2	HGNC:417|MIM:612724|Ensembl:ENSG00000136872|HPRD:01972|Vega:OTTHUMG00000020378	9	9q21.3-q22.2	aldolase B, fructose-bisphosphate	protein-coding	ALDOB	aldolase B, fructose-bisphosphate	O	aldolase 2|aldolase B, fructose-bisphosphatase|fructose-bisphosphate aldolase B|liver-type aldolase	20130505
9606	230	ALDOC	-	ALDC	HGNC:418|MIM:103870|Ensembl:ENSG00000109107|HPRD:02386|Vega:OTTHUMG00000132605	17	17cen-q12	aldolase C, fructose-bisphosphate	protein-coding	ALDOC	aldolase C, fructose-bisphosphate	O	aldolase 3|brain-type aldolase|fructoaldolase C|fructose-1,6-biphosphate triosephosphate lyase|fructose-bisphosphate aldolase C	20130505
9606	231	AKR1B1	-	ADR|ALDR1|ALR2|AR	HGNC:381|MIM:103880|Ensembl:ENSG00000085662|HPRD:00071|Vega:OTTHUMG00000155322	7	7q35	aldo-keto reductase family 1, member B1 (aldose reductase)	protein-coding	AKR1B1	aldo-keto reductase family 1, member B1 (aldose reductase)	O	Lii5-2 CTCL tumor antigen|aldehyde reductase 1|aldo-keto reductase family 1 member B1|aldose reductase|low Km aldose reductase	20130505
9606	236	AKR1B1P2	-	ALDRP	HGNC:425	3	3p12	aldo-keto reductase family 1, member B1 pseudogene 2	pseudo	AKR1B1P2	aldo-keto reductase family 1, member B1 pseudogene 2	O	-	20130226
9606	238	ALK	-	CD246|NBLST3	HGNC:427|MIM:105590|Ensembl:ENSG00000171094|HPRD:00104|Vega:OTTHUMG00000152034	2	2p23	anaplastic lymphoma receptor tyrosine kinase	protein-coding	ALK	anaplastic lymphoma receptor tyrosine kinase	O	ALK tyrosine kinase receptor|CD246 antigen|mutant anaplastic lymphoma kinase	20130512
9606	239	ALOX12	-	12-LOX|12S-LOX|LOG12	HGNC:429|MIM:152391|Ensembl:ENSG00000108839|HPRD:01066|Vega:OTTHUMG00000102088	17	17p13.1	arachidonate 12-lipoxygenase	protein-coding	ALOX12	arachidonate 12-lipoxygenase	O	12(S)-lipoxygenase|12S-lipoxygenase|arachidonate 12-lipoxygenase, 12S-type|platelet 12-LOX|platelet-type 12-lipoxygenase|platelet-type lipoxygenase 12	20130512
9606	240	ALOX5	RP11-67C2.3	5-LO|5-LOX|5LPG|LOG5	HGNC:435|MIM:152390|Ensembl:ENSG00000012779|HPRD:01065|Vega:OTTHUMG00000018081	10	10q11.2	arachidonate 5-lipoxygenase	protein-coding	ALOX5	arachidonate 5-lipoxygenase	O	LOX-5|arachidonic 5-lipoxygenase alpha-10 isoform|arachidonic 5-lipoxygenase delta-10-13 isoform|arachidonic 5-lipoxygenase delta-13 isoform|arachidonic 5-lipoxygenase delta-p10 isoform|arachidonic acid 5-lipoxygenase|leukotriene A4 synthase	20130512
9606	241	ALOX5AP	-	FLAP	HGNC:436|MIM:603700|Ensembl:ENSG00000132965|HPRD:04742|Vega:OTTHUMG00000016677	13	13q12	arachidonate 5-lipoxygenase-activating protein	protein-coding	ALOX5AP	arachidonate 5-lipoxygenase-activating protein	O	MK-886-binding protein	20130505
9606	242	ALOX12B	-	12R-LOX|ARCI2	HGNC:430|MIM:603741|Ensembl:ENSG00000179477|HPRD:04772|Vega:OTTHUMG00000108180	17	17p13.1	arachidonate 12-lipoxygenase, 12R type	protein-coding	ALOX12B	arachidonate 12-lipoxygenase, 12R type	O	12R-lipoxygenase|arachidonate 12-lipoxygenase, 12R-type|epidermis-type lipoxygenase 12	20130504
9606	243	ALOX12P1	-	ALOX12P	HGNC:431	17	17q11	arachidonate 12-lipoxygenase pseudogene 1	pseudo	ALOX12P1	arachidonate 12-lipoxygenase pseudogene 1	O	-	20130226
9606	244	ANXA8L2	-	ANXA8|bA145E20.2	HGNC:23335|Ensembl:ENSG00000186807|HPRD:03866|Vega:OTTHUMG00000018131	10	10q11.22	annexin A8-like 2	protein-coding	ANXA8L2	annexin A8-like 2	O	annexin A8-like protein 2|annexin A8L2	20130505
9606	245	ALOX12P2	-	ALOX12E	HGNC:432	17	17p13	arachidonate 12-lipoxygenase pseudogene 2	pseudo	ALOX12P2	arachidonate 12-lipoxygenase pseudogene 2	O	-	20130226
9606	246	ALOX15	-	15-LOX-1|15LOX-1	HGNC:433|MIM:152392|Ensembl:ENSG00000161905|HPRD:01067|Vega:OTTHUMG00000090746	17	17p13.3	arachidonate 15-lipoxygenase	protein-coding	ALOX15	arachidonate 15-lipoxygenase	O	15-LOX|15-lipooxygenase-1|arachidonate omega-6 lipoxygenase	20130512
9606	247	ALOX15B	-	15-LOX-2	HGNC:434|MIM:603697|Ensembl:ENSG00000179593|HPRD:04739|Vega:OTTHUMG00000108181	17	17p13.1	arachidonate 15-lipoxygenase, type B	protein-coding	ALOX15B	arachidonate 15-lipoxygenase, type B	O	15-LOX-B|15S-lipoxygenase|arachidonate 15-lipoxygenase 2|arachidonate 15-lipoxygenase B|arachidonate 15-lipoxygenase type II|arachidonate 15-lipoxygenase, second type|arachidonate omega(6) lipoxygenase	20130505
9606	248	ALPI	-	IAP	HGNC:437|MIM:171740|Ensembl:ENSG00000163295|HPRD:01376|Vega:OTTHUMG00000133258	2	2q37.1	alkaline phosphatase, intestinal	protein-coding	ALPI	alkaline phosphatase, intestinal	O	Kasahara isozyme|alkaline phosphomonoesterase|glycerophosphatase|intestinal alkaline phosphatase|intestinal-type alkaline phosphatase	20130505
9606	249	ALPL	-	AP-TNAP|APTNAP|HOPS|TNAP|TNSALP	HGNC:438|MIM:171760|Ensembl:ENSG00000162551|HPRD:01377|Vega:OTTHUMG00000002949	1	1p36.12	alkaline phosphatase, liver/bone/kidney	protein-coding	ALPL	alkaline phosphatase, liver/bone/kidney	O	alkaline phosphatase liver/bone/kidney isozyme|alkaline phosphatase, tissue-nonspecific isozyme|alkaline phosphomonoesterase|glycerophosphatase|liver/bone/kidney-type alkaline phosphatase|tissue-nonspecific ALP	20130512
9606	250	ALPP	-	ALP|PALP|PLAP|PLAP-1	HGNC:439|MIM:171800|Ensembl:ENSG00000163283|Vega:OTTHUMG00000133255	2	2q37	alkaline phosphatase, placental	protein-coding	ALPP	alkaline phosphatase, placental	O	Regan isozyme|alkaline phosphatase Regan isozyme|alkaline phosphatase, placental type|alkaline phosphomonoesterase|glycerophosphatase|placental alkaline phosphatase 1	20130505
9606	251	ALPPL2	-	ALPG|ALPPL|GCAP	HGNC:441|MIM:171810|Ensembl:ENSG00000163286|HPRD:01380|Vega:OTTHUMG00000133257	2	2q37	alkaline phosphatase, placental-like 2	protein-coding	ALPPL2	alkaline phosphatase, placental-like 2	O	ALP-1|Nagao isozyme|alkaline phosphatase Nagao isozyme|alkaline phosphatase, placental-like|germ cell alkaline phosphatase|placental-like alkaline phosphatase|testicular and thymus alkaline phosphatase	20130505
9606	253	ALS3	-	ALS6	HGNC:444|MIM:606640	18	18q21	amyotrophic lateral sclerosis 3 (autosomal dominant)	unknown	ALS3	amyotrophic lateral sclerosis 3 (autosomal dominant)	O	-	20130226
9606	255	ALS5	-	-	HGNC:446|MIM:602099	15	15q15.1-q21.1	amyotrophic lateral sclerosis 5	unknown	ALS5	amyotrophic lateral sclerosis 5	O	-	20130226
9606	257	ALX3	-	FND1	HGNC:449|MIM:606014|HPRD:16190	1	1p13.3	ALX homeobox 3	protein-coding	ALX3	ALX homeobox 3	O	aristaless-like homeobox 3|homeobox protein aristaless-like 3|proline-rich transcription factor ALX3	20130226
9606	258	AMBN	-	-	HGNC:452|MIM:601259|Ensembl:ENSG00000178522|HPRD:03160|Vega:OTTHUMG00000129913	4	4q21	ameloblastin (enamel matrix protein)	protein-coding	AMBN	ameloblastin (enamel matrix protein)	O	ameloblastin	20130226
9606	259	AMBP	-	A1M|EDC1|HCP|HI30|IATIL|ITI|ITIL|ITILC|UTI	HGNC:453|MIM:176870|Ensembl:ENSG00000106927|HPRD:01467|Vega:OTTHUMG00000020534	9	9q32-q33	alpha-1-microglobulin/bikunin precursor	protein-coding	AMBP	alpha-1-microglobulin/bikunin precursor	O	bikunin|complex-forming glycoprotein heterogeneous in charge|growth-inhibiting protein 19|inter-alpha-trypsin inhibitor light chain|protein AMBP|protein HC|trypstatin|uristatin|uronic-acid-rich protein	20130505
9606	261	AMCN	-	AMC|AMC1|AMCN1	HGNC:456|MIM:208100	5	5q35	arthrogryposis multiplex congenita, neurogenic	unknown	AMCN	arthrogryposis multiplex congenita, neurogenic	O	-	20130226
9606	262	AMD1	RP11-397G5.3	ADOMETDC|AMD|SAMDC	HGNC:457|MIM:180980|Ensembl:ENSG00000123505|HPRD:01622|Vega:OTTHUMG00000015369	6	6q21	adenosylmethionine decarboxylase 1	protein-coding	AMD1	adenosylmethionine decarboxylase 1	O	S-adenosylmethionine decarboxylase 1|S-adenosylmethionine decarboxylase proenzyme	20130505
9606	263	AMDP1	-	AMD|AMD2|AMDPX|AMDPY	HGNC:460	X|Y	Xq28 and Yq12	adenosylmethionine decarboxylase pseudogene 1	pseudo	AMDP1	adenosylmethionine decarboxylase pseudogene 1	O	-	20130226
9606	265	AMELX	-	AI1E|AIH1|ALGN|AMG|AMGL|AMGX	HGNC:461|MIM:300391|Ensembl:ENSG00000125363|HPRD:02313|Vega:OTTHUMG00000021130	X	Xp22.31-p22.1	amelogenin, X-linked	protein-coding	AMELX	amelogenin, X-linked	O	amelogenesis imperfecta 1|amelogenin (X chromosome, amelogenesis imperfecta 1)|amelogenin (amelogenesis imperfecta 1, X-linked)|amelogenin, X isoform	20130319
9606	266	AMELY	-	AMGL|AMGY	HGNC:462|MIM:410000|Ensembl:ENSG00000099721|HPRD:02462|Vega:OTTHUMG00000035297	Y	Yp11.2	amelogenin, Y-linked	protein-coding	AMELY	amelogenin, Y-linked	O	amelogenin (Y chromosome)|amelogenin, Y isoform	20130303
9606	267	AMFR	-	GP78|RNF45	HGNC:463|MIM:603243|Ensembl:ENSG00000159461|HPRD:09130|Vega:OTTHUMG00000133239	16	16q21	autocrine motility factor receptor, E3 ubiquitin protein ligase	protein-coding	AMFR	autocrine motility factor receptor, E3 ubiquitin protein ligase	O	E3 ubiquitin-protein ligase AMFR|RING finger protein 45	20130505
9606	268	AMH	-	MIF|MIS	HGNC:464|MIM:600957|Ensembl:ENSG00000104899|HPRD:02979|Vega:OTTHUMG00000180415	19	19p13.3	anti-Mullerian hormone	protein-coding	AMH	anti-Mullerian hormone	O	Mullerian inhibiting factor|Mullerian inhibiting substance|anti-Muellerian hormone|muellerian-inhibiting factor|muellerian-inhibiting substance	20130505
9606	269	AMHR2	-	AMHR|MISR2|MISRII|MRII	HGNC:465|MIM:600956|Ensembl:ENSG00000135409|HPRD:02978|Vega:OTTHUMG00000170048	12	12q13	anti-Mullerian hormone receptor, type II	protein-coding	AMHR2	anti-Mullerian hormone receptor, type II	O	AMH type II receptor|MIS type II receptor|Muellerian inhibiting substance type II receptor|Mullerian inhibiting substance type II receptor|anti-Muellerian hormone type II receptor|anti-Muellerian hormone type-2 receptor	20130505
9606	270	AMPD1	RP5-1000E10.1	MAD|MADA	HGNC:468|MIM:102770|Ensembl:ENSG00000116748|HPRD:00040|Vega:OTTHUMG00000011892	1	1p13	adenosine monophosphate deaminase 1	protein-coding	AMPD1	adenosine monophosphate deaminase 1	O	AMP deaminase 1|AMPD|adenosine monophosphate deaminase 1 (isoform M)|adenosine monophosphate deaminase-1 (muscle)|myoadenylate deaminase|skeletal muscle AMPD	20130505
9606	271	AMPD2	RP5-1160K1.5	-	HGNC:469|MIM:102771|Ensembl:ENSG00000116337|HPRD:11808|Vega:OTTHUMG00000011649	1	1p13.3	adenosine monophosphate deaminase 2	protein-coding	AMPD2	adenosine monophosphate deaminase 2	O	AMP deaminase 2|AMPD|adenosine monophosphate deaminase 2 (isoform L)	20130505
9606	272	AMPD3	-	-	HGNC:470|MIM:102772|Ensembl:ENSG00000133805|HPRD:00041|Vega:OTTHUMG00000165682	11	11p15	adenosine monophosphate deaminase 3	protein-coding	AMPD3	adenosine monophosphate deaminase 3	O	AMP aminohydrolase|AMP deaminase 3|adenosine monophosphate deaminase (isoform E)|erythrocyte AMP deaminase|erythrocyte type AMP deaminase|erythrocyte-specific AMP deaminase|myoadenylate deaminase	20130505
9606	273	AMPH	-	AMPH1	HGNC:471|MIM:600418|Ensembl:ENSG00000078053|HPRD:02687|Vega:OTTHUMG00000023725	7	7p14-p13	amphiphysin	protein-coding	AMPH	amphiphysin	O	amphiphysin (Stiff-Mann syndrome with breast cancer 128kD autoantigen)|amphiphysin I	20130505
9606	274	BIN1	-	AMPH2|AMPHL|SH3P9	HGNC:1052|MIM:601248|Ensembl:ENSG00000136717|HPRD:03150|Vega:OTTHUMG00000131465	2	2q14	bridging integrator 1	protein-coding	BIN1	bridging integrator 1	O	amphiphysin II|amphiphysin-like protein|box dependant MYC interacting protein 1|box-dependent myc-interacting protein 1|myc box-dependent-interacting protein 1	20130505
9606	275	AMT	-	GCE|GCST|GCVT|NKH	HGNC:473|MIM:238310|Ensembl:ENSG00000145020|HPRD:01997|Vega:OTTHUMG00000156847	3	3p21.2-p21.1	aminomethyltransferase	protein-coding	AMT	aminomethyltransferase	O	aminomethyltransferase, mitochondrial|glycine cleavage system T protein|glycine cleavage system protein T	20130504
9606	276	AMY1A	-	AMY1	HGNC:474|MIM:104700|Ensembl:ENSG00000237763|HPRD:00096|Vega:OTTHUMG00000011020	1	1p21	amylase, alpha 1A (salivary)	protein-coding	AMY1A	amylase, alpha 1A (salivary)	O	1,4-alpha-D-glucan glucanohydrolase 1|alpha-amylase 1|amylase, salivary, alpha-1A|glycogenase|salivary alpha-amylase|salivary amylase alpha 1A	20130505
9606	277	AMY1B	RP11-508C1.1	AMY1	HGNC:475|MIM:104701|Ensembl:ENSG00000174876|HPRD:18510|Vega:OTTHUMG00000011021	1	1p21	amylase, alpha 1B (salivary)	protein-coding	AMY1B	amylase, alpha 1B (salivary)	O	1,4-alpha-D-glucan glucanohydrolase 1|alpha-amylase 1|amylase, salivary, alpha-1B|glycogenase|salivary alpha-amylase|salivary amylase alpha 1B	20130505
9606	278	AMY1C	RP11-508C1.3	AMY1	HGNC:476|MIM:104702|Ensembl:ENSG00000187733|HPRD:15911|Vega:OTTHUMG00000011045	1	1p21	amylase, alpha 1C (salivary)	protein-coding	AMY1C	amylase, alpha 1C (salivary)	O	1,4-alpha-D-glucan glucanohydrolase 1|alpha-amylase 1|amylase, salivary, alpha-1C|glycogenase|salivary alpha-amylase|salivary amylase alpha 1C	20130505
9606	279	AMY2A	-	AMY2|AMY2B|PA	HGNC:477|MIM:104650|Ensembl:ENSG00000243480|HPRD:00094|Vega:OTTHUMG00000011023	1	1p21	amylase, alpha 2A (pancreatic)	protein-coding	AMY2A	amylase, alpha 2A (pancreatic)	O	1,4-alpha-D-glucan glucanohydrolase|alpha-amylase|amylase, pancreatic, alpha-2A|found in the pancreas|glycogenase|pancreatic alpha-amylase|pancreatic amylase 2A|pancreatic amylase alpha 2A	20130505
9606	280	AMY2B	-	AMY2	HGNC:478|MIM:104660|Ensembl:ENSG00000240038|HPRD:00095|Vega:OTTHUMG00000011024	1	1p21	amylase, alpha 2B (pancreatic)	protein-coding	AMY2B	amylase, alpha 2B (pancreatic)	O	1,4-alpha-D-glucan glucanohydrolase 2B|alpha-amylase 2B|alpha-amylase carcinoid|carcinoid alpha-amylase|glycogenase	20130504
9606	281	AMYP1	-	AMY2P	HGNC:479	1	1p21	amylase, alpha pseudogene 1	pseudo	AMYP1	amylase, alpha pseudogene 1	O	-	20130226
9606	282	ANCR	-	-	HGNC:482	15	15q11-q12	Angelman syndrome chromosome region	other	ANCR	Angelman syndrome chromosome region	O	-	20130226
9606	283	ANG	-	ALS9|HEL168|RNASE4|RNASE5	HGNC:483|MIM:105850|Ensembl:ENSG00000214274|HPRD:00105|Vega:OTTHUMG00000029576	14	14q11.1-q11.2	angiogenin, ribonuclease, RNase A family, 5	protein-coding	ANG	angiogenin, ribonuclease, RNase A family, 5	O	RNase 5|angiogenin|epididymis luminal protein 168|ribonuclease 5	20130505
9606	284	ANGPT1	-	AGP1|AGPT|ANG1	HGNC:484|MIM:601667|Ensembl:ENSG00000154188|HPRD:03392|Vega:OTTHUMG00000164812	8	8q23.1	angiopoietin 1	protein-coding	ANGPT1	angiopoietin 1	O	ANG-1|angiopoietin-1	20130512
9606	285	ANGPT2	-	AGPT2|ANG2	HGNC:485|MIM:601922|Ensembl:ENSG00000091879|HPRD:03563|Vega:OTTHUMG00000090365	8	8p23.1	angiopoietin 2	protein-coding	ANGPT2	angiopoietin 2	O	ANG-2|Tie2-ligand|angiopoietin-2|angiopoietin-2B|angiopoietin-2a	20130505
9606	286	ANK1	-	ANK|SPH1|SPH2	HGNC:492|MIM:612641|Ensembl:ENSG00000029534|HPRD:01693|Vega:OTTHUMG00000150281	8	8p11.1	ankyrin 1, erythrocytic	protein-coding	ANK1	ankyrin 1, erythrocytic	O	ANK-1|ankyrin-1|ankyrin-R|erythrocyte ankyrin	20130505
9606	287	ANK2	-	ANK-2|LQT4|brank-2	HGNC:493|MIM:106410|Ensembl:ENSG00000145362|HPRD:00110|Vega:OTTHUMG00000132912	4	4q25-q27	ankyrin 2, neuronal	protein-coding	ANK2	ankyrin 2, neuronal	O	ankyrin B|ankyrin, brain|ankyrin-2|ankyrin-2, nonerythrocytic|non-erythroid ankyrin	20130505
9606	288	ANK3	RP11-369L1.1	ANKYRIN-G	HGNC:494|MIM:600465|Ensembl:ENSG00000151150|HPRD:02715|Vega:OTTHUMG00000018288	10	10q21	ankyrin 3, node of Ranvier (ankyrin G)	protein-coding	ANK3	ankyrin 3, node of Ranvier (ankyrin G)	O	ankyrin G119|ankyrin-3	20130512
9606	289	ANOP1	-	MCOPS4	HGNC:498|MIM:301590	X	Xq27-q28	anophthalmos 1 (with mental retardation, without limb anomalies or dental or urogenital abnormalities)	unknown	ANOP1	anophthalmos 1 (with mental retardation, without limb anomalies or dental or urogenital abnormalities)	O	-	20130226
9606	290	ANPEP	-	APN|CD13|GP150|LAP1|P150|PEPN	HGNC:500|MIM:151530|Ensembl:ENSG00000166825|HPRD:01055|Vega:OTTHUMG00000149814	15	15q25-q26	alanyl (membrane) aminopeptidase	protein-coding	ANPEP	alanyl (membrane) aminopeptidase	O	AP-M|AP-N|alanyl aminopeptidase|aminopeptidase M|aminopeptidase N|hAPN|microsomal aminopeptidase|myeloid plasma membrane glycoprotein CD13	20130505
9606	291	SLC25A4	-	AAC1|ANT|ANT1|PEO2|PEO3|T1	HGNC:10990|MIM:103220|HPRD:00058	4	4q35	solute carrier family 25 (mitochondrial carrier; adenine nucleotide translocator), member 4	protein-coding	SLC25A4	solute carrier family 25 (mitochondrial carrier; adenine nucleotide translocator), member 4	O	ADP,ATP carrier protein 1|ADP,ATP carrier protein, heart/skeletal muscle|ADP/ATP translocase 1|ANT 1|adenine nucleotide translocator 1 (skeletal muscle)|heart/skeletal muscle ATP/ADP translocator|solute carrier family 25 member 4	20130505
9606	292	SLC25A5	-	2F1|AAC2|ANT2|T2|T3	HGNC:10991|MIM:300150|Ensembl:ENSG00000005022|HPRD:02147|Vega:OTTHUMG00000022715	X	Xq24	solute carrier family 25 (mitochondrial carrier; adenine nucleotide translocator), member 5	protein-coding	SLC25A5	solute carrier family 25 (mitochondrial carrier; adenine nucleotide translocator), member 5	O	ADP,ATP carrier protein 2|ADP,ATP carrier protein, fibroblast isoform|ADP/ATP carrier protein|ADP/ATP translocase 2|ANT 2|adenine nucleotide translocator 2 (fibroblast)|solute carrier family 25 member 5	20130505
9606	293	SLC25A6	RP11-261P4.6	AAC3|ANT3|ANT3Y	HGNC:10992|MIM:300151|MIM:403000|HPRD:02461	X|Y	Xp22.32 and Yp11.3	solute carrier family 25 (mitochondrial carrier; adenine nucleotide translocator), member 6	protein-coding	SLC25A6	solute carrier family 25 (mitochondrial carrier; adenine nucleotide translocator), member 6	O	ADP,ATP carrier protein|ADP,ATP carrier protein 3|ADP,ATP carrier protein, liver|ADP/ATP translocase 3|ADP/ATP translocator of liver|ANT 2|ANT 3|adenine nucleotide translocator 3|solute carrier family 25 member 6	20130505
9606	301	ANXA1	RP11-71A24.1	ANX1|LPC1	HGNC:533|MIM:151690|Ensembl:ENSG00000135046|HPRD:01060|Vega:OTTHUMG00000020016	9	9q21.13	annexin A1	protein-coding	ANXA1	annexin A1	O	annexin I (lipocortin I)|annexin-1|calpactin II|calpactin-2|chromobindin-9|lipocortin I|p35|phospholipase A2 inhibitory protein	20130505
9606	302	ANXA2	-	ANX2|ANX2L4|CAL1H|LIP2|LPC2|LPC2D|P36|PAP-IV	HGNC:537|MIM:151740|Ensembl:ENSG00000182718|HPRD:01061|Vega:OTTHUMG00000132763	15	15q22.2	annexin A2	protein-coding	ANXA2	annexin A2	O	annexin II|annexin-2|calpactin I heavy chain|calpactin I heavy polypeptide|calpactin-1 heavy chain|chromobindin 8|chromobindin-8|lipocortin II|placental anticoagulant protein IV|protein I	20130505
9606	303	ANXA2P1	-	ANX2L1|ANX2P1|LPC2A	HGNC:538	4	4q31.3	annexin A2 pseudogene 1	pseudo	ANXA2P1	annexin A2 pseudogene 1	O	-	20130226
9606	304	ANXA2P2	-	ANX2L2|ANX2P2|LPC2B	HGNC:539|Ensembl:ENSG00000231991	9	9p13	annexin A2 pseudogene 2	pseudo	ANXA2P2	annexin A2 pseudogene 2	O	-	20130505
9606	305	ANXA2P3	-	ANX2L3|ANX2P3|LIP2|LPC2C	HGNC:540	10	10q21.3	annexin A2 pseudogene 3	pseudo	ANXA2P3	annexin A2 pseudogene 3	O	-	20130226
9606	306	ANXA3	-	ANX3	HGNC:541|MIM:106490|Ensembl:ENSG00000138772|HPRD:00111|Vega:OTTHUMG00000130198	4	4q21.21	annexin A3	protein-coding	ANXA3	annexin A3	O	35-alpha calcimedin|Annexin III (lipocortin III)|PAP-III|annexin III (lipocortin III, 1,2-cyclic-inositol-phosphate phosphodiesterase, placental anticoagulant protein III, calcimedin 35-alpha)|annexin-3|calcimedin 35-alpha|inositol 1,2-cyclic phosphate 2-phosphohydrolase|lipocortin III|placental anticoagulant protein III	20130505
9606	307	ANXA4	-	ANX4|PIG28|ZAP36	HGNC:542|MIM:106491|Ensembl:ENSG00000196975|HPRD:00112|Vega:OTTHUMG00000129649	2	2p13	annexin A4	protein-coding	ANXA4	annexin A4	O	35-beta calcimedin|P32.5|PAP-II|PP4-X|annexin IV (placental anticoagulant protein II)|annexin-4|carbohydrate-binding protein p33/p41|chromobindin-4|endonexin I|lipocortin IV|placental anticoagulant protein II|proliferation-inducing gene 28|proliferation-inducing protein 28|protein II	20130505
9606	308	ANXA5	-	ANX5|ENX2|PP4|RPRGL3	HGNC:543|MIM:131230|Ensembl:ENSG00000164111|HPRD:00568|Vega:OTTHUMG00000133034	4	4q27	annexin A5	protein-coding	ANXA5	annexin A5	O	CBP-I|PAP-I|VAC-alpha|anchorin CII|annexin V|annexin-5|calphobindin I|endonexin II|lipocortin V|placental anticoagulant protein 4|placental anticoagulant protein I|thromboplastin inhibitor|vascular anticoagulant-alpha	20130505
9606	309	ANXA6	-	ANX6|CBP68	HGNC:544|MIM:114070|Ensembl:ENSG00000197043|HPRD:00231|Vega:OTTHUMG00000164179	5	5q33.1	annexin A6	protein-coding	ANXA6	annexin A6	O	67 kDa calelectrin|CPB-II|annexin VI (p68)|annexin-6|calcium-binding protein p68|calelectrin|calphobindin II|calphobindin-II|chromobindin-20|lipocortin VI|p68|p70	20130505
9606	310	ANXA7	RP11-537A6.8	ANX7|SNX|SYNEXIN	HGNC:545|MIM:186360|Ensembl:ENSG00000138279|HPRD:01720|Vega:OTTHUMG00000018463	10	10q22.2	annexin A7	protein-coding	ANXA7	annexin A7	O	annexin VII|annexin-7	20130505
9606	311	ANXA11	RP11-369J21.10-010	ANX11|CAP50	HGNC:535|MIM:602572|Ensembl:ENSG00000122359|HPRD:03983|Vega:OTTHUMG00000018604	10	10q23	annexin A11	protein-coding	ANXA11	annexin A11	O	56 kDa autoantigen|CAP-50|annexin XI|annexin-11|autoantigen, 56-kD|calcyclin-associated annexin 50	20130505
9606	312	ANXA13	-	ANX13|ISA	HGNC:536|MIM:602573|Ensembl:ENSG00000104537|HPRD:03984|Vega:OTTHUMG00000164987	8	8q24.13	annexin A13	protein-coding	ANXA13	annexin A13	O	annexin XIII|annexin, intestine-specific|annexin-13|intestine-specific annexin	20130505
9606	313	AOAH	-	-	HGNC:548|MIM:102593|Ensembl:ENSG00000136250|HPRD:00027|Vega:OTTHUMG00000023566	7	7p14-p12	acyloxyacyl hydrolase (neutrophil)	protein-coding	AOAH	acyloxyacyl hydrolase (neutrophil)	O	acyloxyacyl hydrolase	20130226
9606	314	AOC2	-	DAO2|RAO	HGNC:549|MIM:602268|Ensembl:ENSG00000131480|HPRD:11889|Vega:OTTHUMG00000180655	17	17q21	amine oxidase, copper containing 2 (retina-specific)	protein-coding	AOC2	amine oxidase, copper containing 2 (retina-specific)	O	SSAO|retina-specific copper amine oxidase|semicarbazide-sensitive amine oxidase	20130512
9606	316	AOX1	-	AO|AOH1	HGNC:553|MIM:602841|Ensembl:ENSG00000138356|HPRD:07537|Vega:OTTHUMG00000154536	2	2q33	aldehyde oxidase 1	protein-coding	AOX1	aldehyde oxidase 1	O	aldehyde oxidase	20130505
9606	317	APAF1	-	APAF-1|CED4	HGNC:576|MIM:602233|Ensembl:ENSG00000120868|HPRD:03755|Vega:OTTHUMG00000170214	12	12q23	apoptotic peptidase activating factor 1	protein-coding	APAF1	apoptotic peptidase activating factor 1	O	apoptotic protease-activating factor 1	20130512
9606	318	NUDT2	-	APAH1	HGNC:8049|MIM:602852|Ensembl:ENSG00000164978|HPRD:04168|Vega:OTTHUMG00000019817	9	9p13	nudix (nucleoside diphosphate linked moiety X)-type motif 2	protein-coding	NUDT2	nudix (nucleoside diphosphate linked moiety X)-type motif 2	O	Ap4A hydrolase 1|Ap4Aase|bis(5'-nucleosyl)-tetraphosphatase (asymmetrical)|bis(5'-nucleosyl)-tetraphosphatase [asymmetrical]|diadenosine 5',5'''-P1,P4-tetraphosphate asymmetrical hydrolase|diadenosine 5',5''-P1,P4-tetraphosphate pyrophosphohydrolase|diadenosine tetraphosphatase|nucleoside diphosphate-linked moiety X motif 2|nudix motif 2	20130505
9606	319	APOF	-	Apo-F|LTIP	HGNC:615|MIM:107760|Ensembl:ENSG00000175336|HPRD:00137|Vega:OTTHUMG00000170715	12	12q13.3	apolipoprotein F	protein-coding	APOF	apolipoprotein F	O	lipid transfer inhibitor protein	20130505
9606	320	APBA1	-	D9S411E|LIN10|MINT1|X11|X11A|X11ALPHA	HGNC:578|MIM:602414|HPRD:03879	9	9q13-q21.1	amyloid beta (A4) precursor protein-binding, family A, member 1	protein-coding	APBA1	amyloid beta (A4) precursor protein-binding, family A, member 1	O	adapter protein X11alpha|adaptor protein X11alpha|amyloid beta (A4) precursor protein-binding, family A, member 1 (X11)|amyloid beta A4 precursor protein-binding family A member 1|mint-1|neuron-specific X11 protein|neuronal munc18-1-interacting protein 1|phosphotyrosine-binding/-interacting domain (PTB)-bearing protein	20130505
9606	321	APBA2	-	D15S1518E|HsT16821|LIN-10|MGC:14091|MINT2|X11-BETA|X11L	HGNC:579|MIM:602712|Ensembl:ENSG00000034053|HPRD:04090|Vega:OTTHUMG00000129255	15	15q11-q12	amyloid beta (A4) precursor protein-binding, family A, member 2	protein-coding	APBA2	amyloid beta (A4) precursor protein-binding, family A, member 2	O	X11-like protein|adapter protein X11beta|amyloid beta (A4) precursor protein-binding, family A, member 2 (X11-like)|amyloid beta A4 precursor protein-binding family A member 2|mint-2|neuron-specific X11L protein|neuronal munc18-1-interacting protein 2|phosphotyrosine-binding/-interacting domain (PTB)-bearing protein	20130512
9606	322	APBB1	-	FE65|MGC:9072|RIR	HGNC:581|MIM:602709|Ensembl:ENSG00000166313|HPRD:04087|Vega:OTTHUMG00000165454	11	11p15	amyloid beta (A4) precursor protein-binding, family B, member 1 (Fe65)	protein-coding	APBB1	amyloid beta (A4) precursor protein-binding, family B, member 1 (Fe65)	O	adaptor protein FE65a2|amyloid beta A4 precursor protein-binding family B member 1|stat-like protein	20130505
9606	323	APBB2	-	FE65L|FE65L1	HGNC:582|MIM:602710|Ensembl:ENSG00000163697|HPRD:04088|Vega:OTTHUMG00000160416	4	4p13	amyloid beta (A4) precursor protein-binding, family B, member 2	protein-coding	APBB2	amyloid beta (A4) precursor protein-binding, family B, member 2	O	Fe65-like 1|amyloid beta A4 precursor protein-binding family B member 2|protein Fe65-like 1	20130505
9606	324	APC	-	BTPS2|DP2|DP2.5|DP3|GS|PPP1R46	HGNC:583|MIM:611731|Ensembl:ENSG00000134982|HPRD:01439|Vega:OTTHUMG00000128806	5	5q21-q22	adenomatous polyposis coli	protein-coding	APC	adenomatous polyposis coli	O	adenomatosis polyposis coli tumor suppressor|adenomatous polyposis coli protein|deleted in polyposis 2.5|protein phosphatase 1, regulatory subunit 46	20130509
9606	325	APCS	-	PTX2|SAP	HGNC:584|MIM:104770|Ensembl:ENSG00000132703|HPRD:00101|Vega:OTTHUMG00000022741	1	1q21-q23	amyloid P component, serum	protein-coding	APCS	amyloid P component, serum	O	9.5S alpha-1-glycoprotein|pentaxin-related|serum amyloid P-component	20130505
9606	326	AIRE	-	AIRE1|APECED|APS1|APSI|PGA1	HGNC:360|MIM:607358|Ensembl:ENSG00000160224|HPRD:06301|Vega:OTTHUMG00000086921	21	21q22.3	autoimmune regulator	protein-coding	AIRE	autoimmune regulator	O	autoimmune polyendocrinopathy candidiasis ectodermal dystrophy protein	20130505
9606	327	APEH	-	AARE|ACPH|APH|D3F15S2|D3S48E|DNF15S2|OPH	HGNC:586|MIM:102645|Ensembl:ENSG00000164062|HPRD:00034|Vega:OTTHUMG00000156882	3	3p21.31	N-acylaminoacyl-peptide hydrolase	protein-coding	APEH	N-acylaminoacyl-peptide hydrolase	O	acyl-peptide hydrolase|acylamino-acid-releasing enzyme|acylaminoacyl-peptidase|oxidized protein hydrolase	20130505
9606	328	APEX1	-	APE|APE1|APEN|APEX|APX|HAP1|REF1	HGNC:587|MIM:107748|Ensembl:ENSG00000100823|HPRD:00136|Vega:OTTHUMG00000029544	14	14q11.2	APEX nuclease (multifunctional DNA repair enzyme) 1	protein-coding	APEX1	APEX nuclease (multifunctional DNA repair enzyme) 1	O	AP endonuclease class I|AP lyase|DNA-(apurinic or apyrimidinic site) lyase|apurinic-apyrimidinic endonuclease 1|apurinic/apyrimidinic (abasic) endonuclease|deoxyribonuclease (apurinic or apyrimidinic)|protein REF-1|redox factor-1	20130505
9606	329	BIRC2	-	API1|HIAP2|Hiap-2|MIHB|RNF48|c-IAP1|cIAP1	HGNC:590|MIM:601712|Ensembl:ENSG00000110330|HPRD:03419|Vega:OTTHUMG00000167325	11	11q22	baculoviral IAP repeat containing 2	protein-coding	BIRC2	baculoviral IAP repeat containing 2	O	IAP homolog B|IAP-2|NFR2-TRAF signalling complex protein|RING finger protein 48|TNFR2-TRAF-signaling complex protein 2|apoptosis inhibitor 1|baculoviral IAP repeat-containing 2|baculoviral IAP repeat-containing protein 2|inhibitor of apoptosis protein 2	20130505
9606	330	BIRC3	-	AIP1|API2|CIAP2|HAIP1|HIAP1|MALT2|MIHC|RNF49|c-IAP2	HGNC:591|MIM:601721|Ensembl:ENSG00000023445|HPRD:03426|Vega:OTTHUMG00000167324	11	11q22	baculoviral IAP repeat containing 3	protein-coding	BIRC3	baculoviral IAP repeat containing 3	O	IAP homolog C|IAP-1|RING finger protein 49|TNFR2-TRAF signaling complex protein|TNFR2-TRAF-signaling complex protein 1|apoptosis inhibitor 2|baculoviral IAP repeat-containing 3|baculoviral IAP repeat-containing protein 3|inhibitor of apoptosis protein 1|mammalian IAP homolog C	20130505
9606	331	XIAP	RP1-315G1.5	API3|BIRC4|IAP-3|ILP1|MIHA|XLP2|hIAP-3|hIAP3	HGNC:592|MIM:300079|Ensembl:ENSG00000101966|HPRD:02094|Vega:OTTHUMG00000022336	X	Xq25	X-linked inhibitor of apoptosis	protein-coding	XIAP	X-linked inhibitor of apoptosis	O	E3 ubiquitin-protein ligase XIAP|IAP-like protein|X-linked IAP|baculoviral IAP repeat-containing protein 4|inhibitor of apoptosis protein 3	20130505
9606	332	BIRC5	-	API4|EPR-1	HGNC:593|MIM:603352|Ensembl:ENSG00000089685|HPRD:04520|Vega:OTTHUMG00000177505	17	17q25	baculoviral IAP repeat containing 5	protein-coding	BIRC5	baculoviral IAP repeat containing 5	O	apoptosis inhibitor 4|apoptosis inhibitor survivin|baculoviral IAP repeat-containing protein 5|survivin variant 3 alpha	20130512
9606	333	APLP1	-	APLP	HGNC:597|MIM:104775|Ensembl:ENSG00000105290|HPRD:00102|Vega:OTTHUMG00000180692	19	19q13.1	amyloid beta (A4) precursor-like protein 1	protein-coding	APLP1	amyloid beta (A4) precursor-like protein 1	O	APLP-1|amyloid precursor-like protein 1|amyloid-like protein 1	20130505
9606	334	APLP2	-	APLP-2|APPH|APPL2|CDEBP	HGNC:598|MIM:104776|Ensembl:ENSG00000084234|HPRD:00103|Vega:OTTHUMG00000165767	11	11q24	amyloid beta (A4) precursor-like protein 2	protein-coding	APLP2	amyloid beta (A4) precursor-like protein 2	O	CDEI box-binding protein|amyloid precursor protein homolog HSD-2|amyloid-like protein 2	20130505
9606	335	APOA1	-	-	HGNC:600|MIM:107680|Ensembl:ENSG00000118137|HPRD:02517|Vega:OTTHUMG00000046112	11	11q23-q24	apolipoprotein A-I	protein-coding	APOA1	apolipoprotein A-I	O	apo-AI|apoA-I	20130512
9606	336	APOA2	-	Apo-AII|ApoA-II|apoAII	HGNC:601|MIM:107670|Ensembl:ENSG00000158874|HPRD:00129|Vega:OTTHUMG00000034346	1	1q23.3	apolipoprotein A-II	protein-coding	APOA2	apolipoprotein A-II	O	apolipoprotein A2	20130505
9606	337	APOA4	-	-	HGNC:602|MIM:107690|Ensembl:ENSG00000110244|HPRD:00130|Vega:OTTHUMG00000046110	11	11q23	apolipoprotein A-IV	protein-coding	APOA4	apolipoprotein A-IV	O	apo-AIV|apoA-IV|apolipoprotein A4	20130505
9606	338	APOB	-	FLDB|LDLCQ4	HGNC:603|MIM:107730|Ensembl:ENSG00000084674|HPRD:00133|Vega:OTTHUMG00000090785	2	2p24-p23	apolipoprotein B (including Ag(x) antigen)	protein-coding	APOB	apolipoprotein B (including Ag(x) antigen)	O	apo B-100|apoB-100|apoB-48|apolipoprotein B-100|apolipoprotein B48|mutant Apo B 100	20130505
9606	339	APOBEC1	-	APOBEC-1|BEDP|CDAR1|HEPR	HGNC:604|MIM:600130|Ensembl:ENSG00000111701|HPRD:02531|Vega:OTTHUMG00000141288	12	12p13.1	apolipoprotein B mRNA editing enzyme, catalytic polypeptide 1	protein-coding	APOBEC1	apolipoprotein B mRNA editing enzyme, catalytic polypeptide 1	O	C->U-editing enzyme APOBEC-1|apolipoprotein B mRNA editing enzyme complex-1|apolipoprotein B mRNA-editing enzyme 1	20130505
9606	341	APOC1	-	-	HGNC:607|MIM:107710|Ensembl:ENSG00000130208|HPRD:00131	19	19q13.2	apolipoprotein C-I	protein-coding	APOC1	apolipoprotein C-I	O	apo-CIB|apoC-IB|apolipoprotein C1	20130505
9606	342	APOC1P1	-	-	HGNC:608|Ensembl:ENSG00000214855	19	19q13.2	apolipoprotein C-I pseudogene 1	pseudo	APOC1P1	apolipoprotein C-I pseudogene 1	O	-	20130226
9606	343	AQP8	-	AQP-8	HGNC:642|MIM:603750|Ensembl:ENSG00000103375|HPRD:04778|Vega:OTTHUMG00000097013	16	16p12	aquaporin 8	protein-coding	AQP8	aquaporin 8	O	aquaporin-8	20130226
9606	344	APOC2	-	APO-CII|APOC-II	HGNC:609|MIM:608083|Ensembl:ENSG00000224916|HPRD:07457	19	19q13.2	apolipoprotein C-II	protein-coding	APOC2	apolipoprotein C-II	O	apolipoprotein C2	20130505
9606	345	APOC3	-	APOCIII|HALP2	HGNC:610|MIM:107720|Ensembl:ENSG00000110245|HPRD:00132|Vega:OTTHUMG00000046115	11	11q23.3	apolipoprotein C-III	protein-coding	APOC3	apolipoprotein C-III	O	apo-CIII|apoC-III|apolipoprotein C3	20130505
9606	346	APOC4	-	APO-CIV|APOC-IV	HGNC:611|MIM:600745|Ensembl:ENSG00000224916|Ensembl:ENSG00000267467|HPRD:02848|Vega:OTTHUMG00000180845	19	19q13.2	apolipoprotein C-IV	protein-coding	APOC4	apolipoprotein C-IV	O	apolipoprotein C4	20130505
9606	347	APOD	-	-	HGNC:612|MIM:107740|Ensembl:ENSG00000189058|HPRD:00134|Vega:OTTHUMG00000155854	3	3q26.2-qter	apolipoprotein D	protein-coding	APOD	apolipoprotein D	O	apo-D	20130512
9606	348	APOE	-	AD2|LDLCQ5|LPG	HGNC:613|MIM:107741|Ensembl:ENSG00000130203|HPRD:00135|Vega:OTTHUMG00000128901	19	19q13.2	apolipoprotein E	protein-coding	APOE	apolipoprotein E	O	apo-E|apolipoprotein E3	20130512
9606	350	APOH	-	B2G1|B2GP1|BG	HGNC:616|MIM:138700|Ensembl:ENSG00000091583|HPRD:00728|Vega:OTTHUMG00000179530	17	17q24.2	apolipoprotein H (beta-2-glycoprotein I)	protein-coding	APOH	apolipoprotein H (beta-2-glycoprotein I)	O	APC inhibitor|B2GPI|activated protein C-binding protein|anticardiolipin cofactor|apo-H|beta(2)GPI|beta-2-glycoprotein 1	20130505
9606	351	APP	-	AAA|ABETA|ABPP|AD1|APPI|CTFgamma|CVAP|PN-II|PN2	HGNC:620|MIM:104760|Ensembl:ENSG00000142192|HPRD:00100|Vega:OTTHUMG00000078438	21	21q21.3	amyloid beta (A4) precursor protein	protein-coding	APP	amyloid beta (A4) precursor protein	O	alzheimer disease amyloid protein|amyloid beta A4 protein|beta-amyloid peptide|cerebral vascular amyloid peptide|peptidase nexin-II|preA4|protease nexin-II	20130512
9606	353	APRT	-	AMP|APRTD	HGNC:626|MIM:102600|Ensembl:ENSG00000198931|HPRD:00029|Vega:OTTHUMG00000175454	16	16q24	adenine phosphoribosyltransferase	protein-coding	APRT	adenine phosphoribosyltransferase	O	AMP diphosphorylase|AMP pyrophosphorylase|transphosphoribosidase	20130505
9606	354	KLK3	-	APS|KLK2A1|PSA|hK3	HGNC:6364|MIM:176820|Ensembl:ENSG00000142515|HPRD:01461|Vega:OTTHUMG00000182867	19	19q13.41	kallikrein-related peptidase 3	protein-coding	KLK3	kallikrein-related peptidase 3	O	P-30 antigen|gamma-seminoprotein|kallikrein-3|prostate specific antigen|prostate-specific antigen|semenogelase|seminin	20130505
9606	355	FAS	RP11-399O19.7	ALPS1A|APO-1|APT1|CD95|FAS1|FASTM|TNFRSF6	HGNC:11920|MIM:134637|Ensembl:ENSG00000026103|HPRD:00609|Vega:OTTHUMG00000018701	10	10q24.1	Fas (TNF receptor superfamily, member 6)	protein-coding	FAS	Fas (TNF receptor superfamily, member 6)	O	APO-1 cell surface antigen|CD95 antigen|Delta Fas/APO-1/CD95|FAS 827dupA|FASLG receptor|Fas AMA|apoptosis antigen 1|apoptosis-mediating surface antigen FAS|tumor necrosis factor receptor superfamily member 6|tumor necrosis factor receptor superfamily, member 6	20130512
9606	356	FASLG	-	ALPS1B|APT1LG1|APTL|CD178|CD95-L|CD95L|FASL|TNFSF6	HGNC:11936|MIM:134638|Ensembl:ENSG00000117560|HPRD:00610|Vega:OTTHUMG00000034841	1	1q23	Fas ligand (TNF superfamily, member 6)	protein-coding	FASLG	Fas ligand (TNF superfamily, member 6)	O	CD95 ligand|apoptosis (APO-1) antigen ligand 1|apoptosis antigen ligand|fas antigen ligand|tumor necrosis factor (ligand) superfamily, member 6|tumor necrosis factor ligand superfamily member 6	20130512
9606	357	SHROOM2	-	APXL|HSAPXL	HGNC:630|MIM:300103|Ensembl:ENSG00000146950|HPRD:02113|Vega:OTTHUMG00000021121	X	Xp22.3	shroom family member 2	protein-coding	SHROOM2	shroom family member 2	O	APX homolog of Xenopus|apical-like protein|protein Shroom2	20130505
9606	358	AQP1	-	AQP-CHIP|CHIP28|CO	HGNC:633|MIM:107776|Ensembl:ENSG00000240583|HPRD:00140|Vega:OTTHUMG00000023944	7	7p14	aquaporin 1 (Colton blood group)	protein-coding	AQP1	aquaporin 1 (Colton blood group)	O	Colton blood group|aquaporin 1 (channel-forming integral protein, 28kDa, CO blood group)|aquaporin-1|aquaporin-CHIP|channel-like integral membrane protein, 28-kDa|urine water channel|water channel protein for red blood cells and kidney proximal tubule	20130512
9606	359	AQP2	-	AQP-CD|WCH-CD	HGNC:634|MIM:107777|Ensembl:ENSG00000167580|HPRD:00141|Vega:OTTHUMG00000169709	12	12q12-q13	aquaporin 2 (collecting duct)	protein-coding	AQP2	aquaporin 2 (collecting duct)	O	ADH water channel|AQP-2|aquaporin-2|aquaporin-CD|collecting duct water channel protein|water channel protein for renal collecting duct|water-channel aquaporin 2	20130505
9606	360	AQP3	-	AQP-3|GIL	HGNC:636|MIM:600170|Ensembl:ENSG00000165272|HPRD:08970|Vega:OTTHUMG00000019769	9	9p13	aquaporin 3 (Gill blood group)	protein-coding	AQP3	aquaporin 3 (Gill blood group)	O	aquaglyceroporin-3|aquaporin 3 (GIL blood group)|aquaporin-3	20130512
9606	361	AQP4	-	HMIWC2|MIWC	HGNC:637|MIM:600308|Ensembl:ENSG00000171885|HPRD:02631|Vega:OTTHUMG00000131955	18	18q11.2-q12.1	aquaporin 4	protein-coding	AQP4	aquaporin 4	O	WCH4|aquaporin type4|aquaporin-4|mercurial-insensitive water channel	20130505
9606	362	AQP5	-	AQP-5	HGNC:638|MIM:600442|HPRD:02706	12	12q13	aquaporin 5	protein-coding	AQP5	aquaporin 5	O	aquaporin-5	20130512
9606	363	AQP6	-	AQP2L|KID	HGNC:639|MIM:601383|HPRD:03226	12	12q13	aquaporin 6, kidney specific	protein-coding	AQP6	aquaporin 6, kidney specific	O	AQP-6|aquaporin 2-like, kidney specific|aquaporin-6|aquaporin-6, kidney specific|hKID|kidney-specific aquaporin	20130226
9606	364	AQP7	RP11-311H10.6	AQP7L|AQP9|AQPap|GLYCQTL	HGNC:640|MIM:602974|Ensembl:ENSG00000165269|HPRD:04277|Vega:OTTHUMG00000019773	9	9p13	aquaporin 7	protein-coding	AQP7	aquaporin 7	O	AQP-7|aquaglyceroporin-7|aquaporin adipose|aquaporin-7	20130226
9606	366	AQP9	-	AQP-9|HsT17287|SSC1	HGNC:643|MIM:602914|Ensembl:ENSG00000103569|HPRD:04223|Vega:OTTHUMG00000132631	15	15q	aquaporin 9	protein-coding	AQP9	aquaporin 9	O	aquaglyceroporin-9|aquaporin-9|small solute channel 1	20130505
9606	367	AR	RP11-383C12.1	AIS|DHTR|HUMARA|HYSP1|KD|NR3C4|SBMA|SMAX1|TFM	HGNC:644|MIM:313700|Ensembl:ENSG00000169083|HPRD:02437|Vega:OTTHUMG00000021740	X	Xq12	androgen receptor	protein-coding	AR	androgen receptor	O	androgen nuclear receptor variant 2|dihydrotestosterone receptor|nuclear receptor subfamily 3 group C member 4	20130505
9606	368	ABCC6	-	ABC34|ARA|EST349056|GACI2|MLP1|MOAT-E|MOATE|MRP6|PXE|PXE1|URG7	HGNC:57|MIM:603234|Ensembl:ENSG00000091262|HPRD:04453|Vega:OTTHUMG00000129967	16	16p13.1	ATP-binding cassette, sub-family C (CFTR/MRP), member 6	protein-coding	ABCC6	ATP-binding cassette, sub-family C (CFTR/MRP), member 6	O	ATP-binding cassette sub-family C member 6|anthracycline resistance-associated protein|multi-specific organic anion transporter E|multidrug resistance-associated protein 6	20130505
9606	369	ARAF	RP1-230G1.1	A-RAF|ARAF1|PKS2|RAFA1	HGNC:646|MIM:311010|Ensembl:ENSG00000078061|HPRD:02405|Vega:OTTHUMG00000021446	X	Xp11.4-p11.2	v-raf murine sarcoma 3611 viral oncogene homolog	protein-coding	ARAF	v-raf murine sarcoma 3611 viral oncogene homolog	O	A-Raf proto-oncogene serine/threonine-protein kinase|Oncogene ARAF1|Ras-binding protein DA-Raf|proto-oncogene A-Raf-1|proto-oncogene Pks|serine/threonine-protein kinase A-Raf|v-raf murine sarcoma 3611 viral oncogene homolog 1	20130505
9606	372	ARCN1	-	COPD	HGNC:649|MIM:600820|Ensembl:ENSG00000095139|HPRD:02893|Vega:OTTHUMG00000166340	11	11q23.3	archain 1	protein-coding	ARCN1	archain 1	O	archain vesicle transport protein 1|coatomer delta subunit|coatomer protein complex, subunit delta|coatomer protein delta-COP|coatomer subunit delta|delta-COP|delta-coat protein	20130505
9606	373	TRIM23	-	ARD1|ARFD1|RNF46	HGNC:660|MIM:601747|Ensembl:ENSG00000113595|HPRD:03449|Vega:OTTHUMG00000097802	5	5q12.3	tripartite motif containing 23	protein-coding	TRIM23	tripartite motif containing 23	O	ADP-ribosylation factor domain protein 1, 64kDa|ADP-ribosylation factor domain-containing protein 1|ARF domain protein 1|E3 ubiquitin-protein ligase TRIM23|GTP-binding protein ARD-1|RING finger protein 46|tripartite motif protein TRIM23|tripartite motif-containing 23|tripartite motif-containing protein 23	20130505
9606	374	AREG	-	AR|CRDGF|SDGF	HGNC:651|MIM:104640|Ensembl:ENSG00000109321|HPRD:00093|Vega:OTTHUMG00000130006	4	4q13.3	amphiregulin	protein-coding	AREG	amphiregulin	O	colorectum cell-derived growth factor|schwannoma-derived growth factor	20130505
9606	375	ARF1	-	-	HGNC:652|MIM:103180|Ensembl:ENSG00000143761|HPRD:00054|Vega:OTTHUMG00000037595	1	1q42	ADP-ribosylation factor 1	protein-coding	ARF1	ADP-ribosylation factor 1	O	-	20130505
9606	377	ARF3	-	-	HGNC:654|MIM:103190|Ensembl:ENSG00000134287|HPRD:00056|Vega:OTTHUMG00000168080	12	12q13	ADP-ribosylation factor 3	protein-coding	ARF3	ADP-ribosylation factor 3	O	small GTP binding protein	20130505
9606	378	ARF4	-	ARF2	HGNC:655|MIM:601177|Ensembl:ENSG00000168374|HPRD:03107|Vega:OTTHUMG00000158601	3	3p21.2-p21.1	ADP-ribosylation factor 4	protein-coding	ARF4	ADP-ribosylation factor 4	O	ADP-ribosylation factor 2	20130505
9606	379	ARL4D	-	ARF4L|ARL6	HGNC:656|MIM:600732|Ensembl:ENSG00000175906|HPRD:02842|Vega:OTTHUMG00000180881	17	17q21.31	ADP-ribosylation factor-like 4D	protein-coding	ARL4D	ADP-ribosylation factor-like 4D	O	ADP-ribosylation factor-like 6|ADP-ribosylation factor-like protein 4D|ADP-ribosylation factor-like protein 4L	20130505
9606	380	ARF4P1	-	ARF4P	HGNC:657	9	9q34	ADP-ribosylation factor 4 pseudogene 1	pseudo	ARF4P1	ADP-ribosylation factor 4 pseudogene 1	O	-	20130226
9606	381	ARF5	-	-	HGNC:658|MIM:103188|Ensembl:ENSG00000004059|HPRD:00055|Vega:OTTHUMG00000023246	7	7q31.3	ADP-ribosylation factor 5	protein-coding	ARF5	ADP-ribosylation factor 5	O	-	20130505
9606	382	ARF6	-	-	HGNC:659|MIM:600464|HPRD:02714	14	14q21.3	ADP-ribosylation factor 6	protein-coding	ARF6	ADP-ribosylation factor 6	O	-	20130505
9606	383	ARG1	-	-	HGNC:663|MIM:608313|Ensembl:ENSG00000118520|HPRD:01947|Vega:OTTHUMG00000015566	6	6q23	arginase, liver	protein-coding	ARG1	arginase, liver	O	arginase-1|liver-type arginase|type I arginase	20130505
9606	384	ARG2	-	-	HGNC:664|MIM:107830|Ensembl:ENSG00000081181|HPRD:00143|Vega:OTTHUMG00000171807	14	14q24.1	arginase 2	protein-coding	ARG2	arginase 2	O	L-arginine amidinohydrolase|L-arginine ureahydrolase|arginase, type II|arginase-2, mitochondrial|kidney arginase|kidney-type arginase|non-hepatic arginase|nonhepatic arginase|type II arginase	20130505
9606	387	RHOA	-	ARH12|ARHA|RHO12|RHOH12	HGNC:667|MIM:165390|Ensembl:ENSG00000067560|HPRD:01323|Vega:OTTHUMG00000156838	3	3p21.3	ras homolog family member A	protein-coding	RHOA	ras homolog family member A	O	Aplysia ras-related homolog 12|h12|oncogene RHO H12|ras homolog gene family, member A|rho cDNA clone 12|small GTP binding protein RhoA|transforming protein RhoA	20130505
9606	388	RHOB	-	ARH6|ARHB|MST081|MSTP081|RHOH6	HGNC:668|MIM:165370|Ensembl:ENSG00000143878|HPRD:01321|Vega:OTTHUMG00000090755	2	2p24	ras homolog family member B	protein-coding	RHOB	ras homolog family member B	O	Aplysia RAS-related homolog 6|h6|oncogene RHO H6|ras homolog gene family, member B|rho cDNA clone 6|rho-related GTP-binding protein RhoB	20130505
9606	389	RHOC	RP11-426L16.4	ARH9|ARHC|H9|RHOH9	HGNC:669|MIM:165380|Ensembl:ENSG00000155366|HPRD:01322|Vega:OTTHUMG00000011905	1	1p13.1	ras homolog family member C	protein-coding	RHOC	ras homolog family member C	O	RAS-related homolog 9|oncogene RHO H9|ras homolog gene family, member C|rho cDNA clone 9|rho-related GTP-binding protein RhoC|rhoC GTPase|small GTP binding protein RhoC	20130505
9606	390	RND3	-	ARHE|Rho8|RhoE|memB	HGNC:671|MIM:602924|Ensembl:ENSG00000115963|HPRD:04233|Vega:OTTHUMG00000131859	2	2q23.3	Rho family GTPase 3	protein-coding	RND3	Rho family GTPase 3	O	protein MemB|ras homolog gene family, member E|rho-related GTP-binding protein Rho8|rho-related GTP-binding protein RhoE|small GTP binding protein Rho8	20130505
9606	391	RHOG	-	ARHG	HGNC:672|MIM:179505|Ensembl:ENSG00000177105|HPRD:01537|Vega:OTTHUMG00000012287	11	11p15.5-p15.4	ras homolog family member G	protein-coding	RHOG	ras homolog family member G	O	ras homolog gene family, member G (rho G)|rho-related GTP-binding protein RhoG	20130505
9606	392	ARHGAP1	-	CDC42GAP|RHOGAP|RHOGAP1|p50rhoGAP	HGNC:673|MIM:602732|Ensembl:ENSG00000175220|HPRD:04108|Vega:OTTHUMG00000166567	11	11p11.2	Rho GTPase activating protein 1	protein-coding	ARHGAP1	Rho GTPase activating protein 1	O	CDC42 GTPase-activating protein|GTPase-activating protein rhoGAP|GTPase-activating protein rhoOGAP|GTPase-activating protein, Rho, 1|rho GTPase-activating protein 1|rho-related small GTPase protein activator|rho-type GTPase-activating protein 1	20130505
9606	393	ARHGAP4	-	C1|RGC1|RhoGAP4|SrGAP4|p115	HGNC:674|MIM:300023|Ensembl:ENSG00000089820|HPRD:02063|Vega:OTTHUMG00000024226	X	Xq28	Rho GTPase activating protein 4	protein-coding	ARHGAP4	Rho GTPase activating protein 4	O	Rho-GAP hematopoietic protein C1|rho GTPase-activating protein 4|rho-type GTPase-activating protein 4	20130505
9606	394	ARHGAP5	-	GFI2|RhoGAP5|p190-B|p190BRhoGAP	HGNC:675|MIM:602680|Ensembl:ENSG00000100852|HPRD:04060	14	14q12	Rho GTPase activating protein 5	protein-coding	ARHGAP5	Rho GTPase activating protein 5	O	growth factor independent 2|p100 RasGAP-associated p105 protein|p105 RhoGAP|rho GTPase-activating protein 5|rho-type GTPase-activating protein 5	20130505
9606	395	ARHGAP6	-	RHOGAP6|RHOGAPX-1	HGNC:676|MIM:300118|Ensembl:ENSG00000047648|HPRD:02124|Vega:OTTHUMG00000021134	X	Xp22.3	Rho GTPase activating protein 6	protein-coding	ARHGAP6	Rho GTPase activating protein 6	O	Rho-type GTPase-activating protein RhoGAPX-1|rho GTPase-activating protein 6|rho-type GTPase-activating protein 6	20130505
9606	396	ARHGDIA	-	GDIA1|RHOGDI|RHOGDI-1	HGNC:678|MIM:601925|Ensembl:ENSG00000141522|HPRD:03565|Vega:OTTHUMG00000178352	17	17q25.3	Rho GDP dissociation inhibitor (GDI) alpha	protein-coding	ARHGDIA	Rho GDP dissociation inhibitor (GDI) alpha	O	rho GDI 1|rho GDP-dissociation inhibitor 1|rho-GDI alpha	20130505
9606	397	ARHGDIB	-	D4|GDIA2|GDID4|LYGDI|Ly-GDI|RAP1GN1|RhoGDI2	HGNC:679|MIM:602843|Ensembl:ENSG00000111348|HPRD:04162|Vega:OTTHUMG00000168742	12	12p12.3	Rho GDP dissociation inhibitor (GDI) beta	protein-coding	ARHGDIB	Rho GDP dissociation inhibitor (GDI) beta	O	Rho GDI 2|rho GDP-dissociation inhibitor 2|rho-GDI beta	20130505
9606	398	ARHGDIG	LA16c-314G4.1	RHOGDI-3	HGNC:680|MIM:602844|Ensembl:ENSG00000242173|HPRD:04163|Vega:OTTHUMG00000064892	16	16p13.3	Rho GDP dissociation inhibitor (GDI) gamma	protein-coding	ARHGDIG	Rho GDP dissociation inhibitor (GDI) gamma	O	RhoGDI gamma|rho GDI 3|rho GDP-dissociation inhibitor 3|rho-GDI gamma	20130505
9606	399	RHOH	-	ARHH|TTF	HGNC:686|MIM:602037|Ensembl:ENSG00000168421|HPRD:03616|Vega:OTTHUMG00000099373	4	4p13	ras homolog family member H	protein-coding	RHOH	ras homolog family member H	O	GTP-binding protein TTF|TTF, translocation three four|ras homolog gene family, member H|rho-related GTP-binding protein RhoH|translocation three four protein	20130505
9606	400	ARL1	-	ARFL1	HGNC:692|MIM:603425|Ensembl:ENSG00000120805|HPRD:04574|Vega:OTTHUMG00000170271	12	12q23.2	ADP-ribosylation factor-like 1	protein-coding	ARL1	ADP-ribosylation factor-like 1	O	ADP-ribosylation factor-like protein 1	20130505
9606	401	PHOX2A	-	ARIX|CFEOM2|FEOM2|NCAM2|PMX2A	HGNC:691|MIM:602753|Ensembl:ENSG00000165462|HPRD:04129|Vega:OTTHUMG00000167899	11	11q13.2	paired-like homeobox 2a	protein-coding	PHOX2A	paired-like homeobox 2a	O	ARIX1 homeodomain protein|aristaless homeobox homolog|aristaless homeobox protein homolog|arix homeodomain protein|paired mesoderm homeobox protein 2A	20130505
9606	402	ARL2	-	ARFL2	HGNC:693|MIM:601175|Ensembl:ENSG00000213465|HPRD:11869|Vega:OTTHUMG00000165728	11	11q13	ADP-ribosylation factor-like 2	protein-coding	ARL2	ADP-ribosylation factor-like 2	O	ADP-ribosylation factor-like protein 2	20130505
9606	403	ARL3	RP11-47A8.3	ARFL3	HGNC:694|MIM:604695|HPRD:05260	10	10q23.3	ADP-ribosylation factor-like 3	protein-coding	ARL3	ADP-ribosylation factor-like 3	O	ADP-ribosylation factor-like protein 3|ARF-like 3	20130505
9606	405	ARNT	-	HIF-1-beta|HIF-1beta|HIF1-beta|HIF1B|HIF1BETA|TANGO|bHLHe2	HGNC:700|MIM:126110|Ensembl:ENSG00000143437|HPRD:00524|Vega:OTTHUMG00000035011	1	1q21	aryl hydrocarbon receptor nuclear translocator	protein-coding	ARNT	aryl hydrocarbon receptor nuclear translocator	O	class E basic helix-loop-helix protein 2|dioxin receptor, nuclear translocator|hypoxia-inducible factor 1, beta subunit	20130505
9606	406	ARNTL	-	BMAL1|BMAL1c|JAP3|MOP3|PASD3|TIC|bHLHe5	HGNC:701|MIM:602550|Ensembl:ENSG00000133794|HPRD:03973|Vega:OTTHUMG00000150623	11	11p15	aryl hydrocarbon receptor nuclear translocator-like	protein-coding	ARNTL	aryl hydrocarbon receptor nuclear translocator-like	O	ARNT-like protein 1, brain and muscle|PAS domain-containing protein 3|aryl hydrocarbon receptor nuclear translocator-like protein 1|bHLH-PAS protein JAP3|basic-helix-loop-helix-PAS orphan MOP3|basic-helix-loop-helix-PAS protein MOP3|brain and muscle ARNT-like 1|class E basic helix-loop-helix protein 5|member of PAS protein 3|member of PAS superfamily 3	20130505
9606	407	ARR3	RP13-26D14.6	ARRX	HGNC:710|MIM:301770|Ensembl:ENSG00000120500|HPRD:02358|Vega:OTTHUMG00000021768	X	Xcen-q21	arrestin 3, retinal (X-arrestin)	protein-coding	ARR3	arrestin 3, retinal (X-arrestin)	O	C-arrestin|X-arrestin|arrestin 4|arrestin-C|cArr|cone arrestin|retinal cone arrestin-3	20130505
9606	408	ARRB1	-	ARB1|ARR1	HGNC:711|MIM:107940|HPRD:00146	11	11q13	arrestin, beta 1	protein-coding	ARRB1	arrestin, beta 1	O	arrestin 2|beta-arrestin-1	20130505
9606	409	ARRB2	-	ARB2|ARR2|BARR2	HGNC:712|MIM:107941|Ensembl:ENSG00000141480|HPRD:00147|Vega:OTTHUMG00000090759	17	17p13	arrestin, beta 2	protein-coding	ARRB2	arrestin, beta 2	O	arrestin 3|arrestin beta-2|beta-arrestin-2	20130505
9606	410	ARSA	-	MLD	HGNC:713|MIM:607574|HPRD:09617	22	22q13.33	arylsulfatase A	protein-coding	ARSA	arylsulfatase A	O	ASA|cerebroside-sulfatase	20130505
9606	411	ARSB	-	ASB|G4S|MPS6	HGNC:714|MIM:611542|Ensembl:ENSG00000113273|HPRD:08358|Vega:OTTHUMG00000108129	5	5q14.1	arylsulfatase B	protein-coding	ARSB	arylsulfatase B	O	N-acetylgalactosamine-4-sulfatase	20130505
9606	412	STS	-	ARSC|ARSC1|ASC|ES|SSDD|XLI	HGNC:11425|MIM:300747|Ensembl:ENSG00000101846|HPRD:02389|Vega:OTTHUMG00000021102	X	Xp22.32	steroid sulfatase (microsomal), isozyme S	protein-coding	STS	steroid sulfatase (microsomal), isozyme S	O	arylsulfatase C|estrone sulfatase|steryl-sulfatase|steryl-sulfate sulfohydrolase	20130504
9606	413	ARSC2	-	ARSC	HGNC:716|MIM:301780	X	Xpter-p22.32	arylsulfatase C, isozyme F	unknown	ARSC2	arylsulfatase C, isozyme F	O	-	20130226
9606	414	ARSD	-	ASD	HGNC:717|MIM:300002|Ensembl:ENSG00000006756|HPRD:02048|Vega:OTTHUMG00000021077	X	Xp22.3	arylsulfatase D	protein-coding	ARSD	arylsulfatase D	O	-	20130416
9606	415	ARSE	-	ASE|CDPX|CDPX1|CDPXR	HGNC:719|MIM:300180|Ensembl:ENSG00000157399|HPRD:02171|Vega:OTTHUMG00000137358	X	Xp22.3	arylsulfatase E (chondrodysplasia punctata 1)	protein-coding	ARSE	arylsulfatase E (chondrodysplasia punctata 1)	O	arylsulfatase E|chondrodysplasia punctata 1	20130505
9606	416	ARSF	-	ASF	HGNC:721|MIM:300003|Ensembl:ENSG00000062096|HPRD:02049|Vega:OTTHUMG00000021081	X	Xp22.3	arylsulfatase F	protein-coding	ARSF	arylsulfatase F	O	-	20130505
9606	417	ART1	-	ART2|ARTC1|CD296|RT6	HGNC:723|MIM:601625|Ensembl:ENSG00000129744|HPRD:03377|Vega:OTTHUMG00000011845	11	11p15	ADP-ribosyltransferase 1	protein-coding	ART1	ADP-ribosyltransferase 1	O	ADP-ribosyltransferase 2|ADP-ribosyltransferase C2 and C3 toxin-like 1|GPI-linked NAD(P)(+)--arginine ADP-ribosyltransferase 1|mono(ADP-ribosyl)transferase 1	20130512
9606	418	ART2P	-	ART1P|RT6	HGNC:724	11	11q13	ADP-ribosyltransferase 2 (RT6 antigen homolog, rat), pseudogene	pseudo	ART2P	ADP-ribosyltransferase 2 (RT6 antigen homolog, rat), pseudogene	O	-	20130226
9606	419	ART3	-	ARTC3	HGNC:725|MIM:603086|Ensembl:ENSG00000156219|HPRD:04363|Vega:OTTHUMG00000130110	4	4q21.1|4p15.1-p14	ADP-ribosyltransferase 3	protein-coding	ART3	ADP-ribosyltransferase 3	O	ADP-ribosyltransferase C2 and C3 toxin-like 3|NAD(P)(+)--arginine ADP-ribosyltransferase 3|ecto-ADP-ribosyltransferase 3|mono(ADP-ribosyl)transferase 3|mono-ADP-ribosyltransferase	20130512
9606	420	ART4	-	ARTC4|CD297|DO|DOK1	HGNC:726|MIM:110600|HPRD:04364	12	12p13-p12	ADP-ribosyltransferase 4 (Dombrock blood group)	protein-coding	ART4	ADP-ribosyltransferase 4 (Dombrock blood group)	O	ADP-ribosyltransferase 4 (DO blood group)|ADP-ribosyltransferase C2 and C3 toxin-like 4|Dombrock blood group carrier molecule|NAD(P)(+)--arginine ADP-ribosyltransferase 4|ecto-ADP-ribosyltransferase 4|mono(ADP-ribosyl)transferase 4|mono-ADP-ribosyltransferase 4	20130505
9606	421	ARVCF	-	-	HGNC:728|MIM:602269|Ensembl:ENSG00000099889|HPRD:03778|Vega:OTTHUMG00000030426	22	22q11.21	armadillo repeat gene deleted in velocardiofacial syndrome	protein-coding	ARVCF	armadillo repeat gene deleted in velocardiofacial syndrome	O	armadillo repeat protein deleted in velo-cardio-facial syndrome	20130505
9606	424	ARVD3	-	ARVD2	HGNC:731|MIM:602086	14	14q12-q22	arrhythmogenic right ventricular dysplasia 3	unknown	ARVD3	arrhythmogenic right ventricular dysplasia 3	O	-	20130226
9606	425	ARVD4	-	-	HGNC:732|MIM:602087	2	2q32.1-q32.3	arrhythmogenic right ventricular dysplasia 4	unknown	ARVD4	arrhythmogenic right ventricular dysplasia 4	O	-	20130226
9606	427	ASAH1	HSD33	AC|ACDase|ASAH|PHP|PHP32|SMAPME	HGNC:735|MIM:613468|Ensembl:ENSG00000104763|HPRD:01969|Vega:OTTHUMG00000096997	8	8p22	N-acylsphingosine amidohydrolase (acid ceramidase) 1	protein-coding	ASAH1	N-acylsphingosine amidohydrolase (acid ceramidase) 1	O	acid CDase|acid ceramidase|acylsphingosine deacylase|putative 32 kDa heart protein	20130505
9606	429	ASCL1	-	ASH1|HASH1|MASH1|bHLHa46	HGNC:738|MIM:100790|Ensembl:ENSG00000139352|HPRD:00011|Vega:OTTHUMG00000169967	12	12q23.2	achaete-scute complex homolog 1 (Drosophila)	protein-coding	ASCL1	achaete-scute complex homolog 1 (Drosophila)	O	ASH-1|achaete scute protein|achaete-scute complex-like 1|achaete-scute homolog 1|class A basic helix-loop-helix protein 46	20130505
9606	430	ASCL2	-	ASH2|HASH2|MASH2|bHLHa45	HGNC:739|MIM:601886|Ensembl:ENSG00000183734|HPRD:03533|Vega:OTTHUMG00000009648	11	11p15.5	achaete-scute complex homolog 2 (Drosophila)	protein-coding	ASCL2	achaete-scute complex homolog 2 (Drosophila)	O	ASH-2|achaete-scute complex-like 2|achaete-scute homolog 2|class A basic helix-loop-helix protein 45|mammalian achaete/scute homologue 2	20130505
9606	431	ASD1	-	-	HGNC:741|MIM:108800	5	5p15.31	atrial septal defect 1	unknown	ASD1	atrial septal defect 1	O	-	20130226
9606	432	ASGR1	-	ASGPR|ASGPR1|CLEC4H1|HL-1	HGNC:742|MIM:108360|Ensembl:ENSG00000141505|HPRD:00151|Vega:OTTHUMG00000102159	17	17p13.2	asialoglycoprotein receptor 1	protein-coding	ASGR1	asialoglycoprotein receptor 1	O	C-type lectin domain family 4 member H1|hepatic lectin H1	20130505
9606	433	ASGR2	-	ASGP-R2|ASGPR2|CLEC4H2|HBXBP|HL-2	HGNC:743|MIM:108361|Ensembl:ENSG00000161944|HPRD:00152|Vega:OTTHUMG00000102158	17	17p	asialoglycoprotein receptor 2	protein-coding	ASGR2	asialoglycoprotein receptor 2	O	C-type lectin domain family 4 member H2|HBxAg-binding protein|hepatic lectin H2	20130505
9606	434	ASIP	-	AGSW|AGTI|AGTIL|ASP|SHEP9	HGNC:745|MIM:600201|Ensembl:ENSG00000101440|HPRD:02562|Vega:OTTHUMG00000032289	20	20q11.2-q12	agouti signaling protein	protein-coding	ASIP	agouti signaling protein	O	agouti signaling protein, nonagouti homolog|agouti switch protein|agouti-signaling protein|nonagouti homolog	20130331
9606	435	ASL	-	ASAL	HGNC:746|MIM:608310|Ensembl:ENSG00000126522|HPRD:01948|Vega:OTTHUMG00000022876	7	7q11.21	argininosuccinate lyase	protein-coding	ASL	argininosuccinate lyase	O	argininosuccinase|arginosuccinase	20130505
9606	436	ASLP1	-	ASLL	HGNC:747	22	22q11.23	argininosuccinate lyase pseudogene 1	pseudo	ASLP1	argininosuccinate lyase pseudogene 1	O	-	20130226
9606	437	ASMD	-	ASOD	HGNC:749|MIM:107250	4	4q28-q31	anterior segment mesenchymal dysgenesis	unknown	ASMD	anterior segment mesenchymal dysgenesis	O	-	20130226
9606	438	ASMT	RP13-297E16.2	ASMTY|HIOMT|HIOMTY	HGNC:750|MIM:300015|MIM:402500|Ensembl:ENSG00000196433|HPRD:02058|Vega:OTTHUMG00000021065	X|Y	Xp22.3 or Yp11.3	acetylserotonin O-methyltransferase	protein-coding	ASMT	acetylserotonin O-methyltransferase	O	acetylserotonin N-methyltransferase|acetylserotonin methyltransferase (Y chromosome)|hydroxyindole O-methyltransferase	20130420
9606	439	ASNA1	-	ARSA-I|ARSA1|ASNA-I|GET3|TRC40|hASNA-I	HGNC:752|MIM:601913|Ensembl:ENSG00000198356|HPRD:03555|Vega:OTTHUMG00000180355	19	19q13.3	arsA arsenite transporter, ATP-binding, homolog 1 (bacterial)	protein-coding	ASNA1	arsA arsenite transporter, ATP-binding, homolog 1 (bacterial)	O	ATPase ASNA1|arsenical pump-driving ATPase|arsenite-stimulated ATPase|golgi to ER traffic 3 homolog|transmembrane domain recognition complex 40 kDa ATPase subunit|transmembrane domain recognition complex, 40kDa	20130512
9606	440	ASNS	-	TS11	HGNC:753|MIM:108370|Ensembl:ENSG00000070669|HPRD:00153|Vega:OTTHUMG00000022892	7	7q21.3	asparagine synthetase (glutamine-hydrolyzing)	protein-coding	ASNS	asparagine synthetase (glutamine-hydrolyzing)	O	TS11 cell cycle control protein|asparagine synthetase [glutamine-hydrolyzing]|glutamine-dependent asparagine synthetase	20130505
9606	442	ASNSP2	-	ASNSL2	HGNC:755	21	21p11.2	asparagine synthetase pseudogene 2	pseudo	ASNSP2	asparagine synthetase pseudogene 2	O	-	20130226
9606	443	ASPA	-	ACY2|ASP	HGNC:756|MIM:608034|HPRD:02033	17	17p13.3	aspartoacylase	protein-coding	ASPA	aspartoacylase	O	ACY-2|aminoacylase 2|aminoacylase-2	20130505
9606	444	ASPH	-	AAH|BAH|CASQ2BP1|HAAH|JCTN|junctin	HGNC:757|MIM:600582|Ensembl:ENSG00000198363|HPRD:08996|Vega:OTTHUMG00000164375	8	8q12.1	aspartate beta-hydroxylase	protein-coding	ASPH	aspartate beta-hydroxylase	O	A beta H-J-J|ASP beta-hydroxylase|aspartyl/asparaginyl beta-hydroxylase|aspartyl/asparaginyl-beta-hydroxylase|cardiac junctin|humbug|junctate|peptide-aspartate beta-dioxygenase	20130505
9606	445	ASS1	RP11-618A20.2	ASS|CTLN1	HGNC:758|MIM:603470|Ensembl:ENSG00000130707|HPRD:04590|Vega:OTTHUMG00000020806	9	9q34.1	argininosuccinate synthase 1	protein-coding	ASS1	argininosuccinate synthase 1	O	argininosuccinate synthase|argininosuccinate synthetase 1|citrulline--aspartate ligase|citrulline-aspartate ligase	20130505
9606	447	ASS1P2	-	ASSP2	HGNC:765	2	2p22.1	argininosuccinate synthetase 1 pseudogene 2	pseudo	ASS1P2	argininosuccinate synthetase 1 pseudogene 2	O	-	20130226
9606	449	ASS1P4	-	ASSP4	HGNC:767	X	Xp22.33	argininosuccinate synthetase 1 pseudogene 4	pseudo	ASS1P4	argininosuccinate synthetase 1 pseudogene 4	O	-	20130226
9606	450	ASS1P5	-	ASSP5	HGNC:768	X	Xq23	argininosuccinate synthetase 1 pseudogene 5	pseudo	ASS1P5	argininosuccinate synthetase 1 pseudogene 5	O	-	20130226
9606	451	ASS1P6	-	ASSP6	HGNC:769	Y	Yq11.21	argininosuccinate synthetase 1 pseudogene 6	pseudo	ASS1P6	argininosuccinate synthetase 1 pseudogene 6	O	-	20130226
9606	453	ASS1P8	-	ASSP8	HGNC:771	4	4q31.22	argininosuccinate synthetase 1 pseudogene 8	pseudo	ASS1P8	argininosuccinate synthetase 1 pseudogene 8	O	-	20130226
9606	454	ASS1P9	-	ASSP9	HGNC:772	5	5q11.2	argininosuccinate synthetase 1 pseudogene 9	pseudo	ASS1P9	argininosuccinate synthetase 1 pseudogene 9	O	-	20130226
9606	455	ASS1P10	-	ASSP10	HGNC:760	5	5q32	argininosuccinate synthetase 1 pseudogene 10	pseudo	ASS1P10	argininosuccinate synthetase 1 pseudogene 10	O	-	20130226
9606	459	ASS1P14	-	ASSP14	HGNC:764	12	12p11.21	argininosuccinate synthetase 1 pseudogene 14	pseudo	ASS1P14	argininosuccinate synthetase 1 pseudogene 14	O	-	20130226
9606	460	ASTN1	-	ASTN	HGNC:773|MIM:600904|Ensembl:ENSG00000152092|HPRD:09019|Vega:OTTHUMG00000035041	1	1q25.2	astrotactin 1	protein-coding	ASTN1	astrotactin 1	O	astrotactin-1	20130505
9606	462	SERPINC1	PRO0309	AT3|AT3D|ATIII|THPH7	HGNC:775|MIM:107300|Ensembl:ENSG00000117601|HPRD:00122|Vega:OTTHUMG00000037276	1	1q25.1	serpin peptidase inhibitor, clade C (antithrombin), member 1	protein-coding	SERPINC1	serpin peptidase inhibitor, clade C (antithrombin), member 1	O	antithrombin III|antithrombin-III|serine (or cysteine) proteinase inhibitor, clade C (antithrombin), member 1|serine-cysteine proteinase inhibitor clade C member 1|serpin C1	20130505
9606	463	ZFHX3	-	ATBF1|ATBT|ZNF927	HGNC:777|MIM:104155|Ensembl:ENSG00000140836|HPRD:00075|Vega:OTTHUMG00000137599	16	16q22.3	zinc finger homeobox 3	protein-coding	ZFHX3	zinc finger homeobox 3	O	AT motif-binding factor 1|AT-binding transcription factor 1|ZFH-3|alpha-fetoprotein enhancer binding protein|alpha-fetoprotein enhancer-binding protein|zinc finger homeobox protein 3|zinc finger homeodomain protein 3	20130505
9606	465	ATD	-	ATD1	HGNC:780|MIM:208500	15	15q13	asphixiating thoracic dystrophy (chondroectodermal dysplasia-like syndrome)	unknown	ATD	asphixiating thoracic dystrophy (chondroectodermal dysplasia-like syndrome)	O	-	20130226
9606	466	ATF1	-	EWS-ATF1|FUS/ATF-1|TREB36	HGNC:783|MIM:123803|Ensembl:ENSG00000123268|HPRD:00440|Vega:OTTHUMG00000169482	12	12q13	activating transcription factor 1	protein-coding	ATF1	activating transcription factor 1	O	cAMP-dependent transcription factor ATF-1|cyclic AMP-dependent transcription factor ATF-1	20130505
9606	467	ATF3	RP11-338C15.1	-	HGNC:785|MIM:603148|Ensembl:ENSG00000162772|HPRD:04395|Vega:OTTHUMG00000036747	1	1q32.3	activating transcription factor 3	protein-coding	ATF3	activating transcription factor 3	O	cAMP-dependent transcription factor ATF-3|cyclic AMP-dependent transcription factor ATF-3	20130505
9606	468	ATF4	-	CREB-2|CREB2|TAXREB67|TXREB	HGNC:786|MIM:604064|Ensembl:ENSG00000128272|HPRD:06817|Vega:OTTHUMG00000151099	22	22q13.1	activating transcription factor 4 (tax-responsive enhancer element B67)	protein-coding	ATF4	activating transcription factor 4 (tax-responsive enhancer element B67)	O	DNA-binding protein TAXREB67|cAMP response element-binding protein 2|cAMP-dependent transcription factor ATF-4|cAMP-responsive element-binding protein 2|cyclic AMP-dependent transcription factor ATF-4|cyclic AMP-responsive element-binding protein 2|tax-responsive enhancer element-binding protein 67	20130505
9606	469	ATF4P1	-	ATF4P|TAXREB67P|TXREBP	HGNC:789	X	Xq28	activating transcription factor 4 pseudogene 1	pseudo	ATF4P1	activating transcription factor 4 pseudogene 1	O	-	20130226
9606	470	ATHS	-	ALP	HGNC:793|MIM:108725	19	19p13.3-p13.2	atherosclerosis susceptibility (lipoprotein associated)	unknown	ATHS	atherosclerosis susceptibility (lipoprotein associated)	O	-	20130226
9606	471	ATIC	OK/SW-cl.86	AICAR|AICARFT|IMPCHASE|PURH	HGNC:794|MIM:601731|Ensembl:ENSG00000138363|HPRD:03434|Vega:OTTHUMG00000133023	2	2q35	5-aminoimidazole-4-carboxamide ribonucleotide formyltransferase/IMP cyclohydrolase	protein-coding	ATIC	5-aminoimidazole-4-carboxamide ribonucleotide formyltransferase/IMP cyclohydrolase	O	5-aminoimidazole-4-carboxamide-1-beta-D-ribonucleotide transformylase/inosinicase|AICAR formyltransferase/IMP cyclohydrolase bifunctional enzyme|AICARFT/IMPCHASE|bifunctional purine biosynthesis protein PURH|phosphoribosylaminoimidazolecarboxamide formyltransferase/IMP cyclohydrolase	20130505
9606	472	ATM	-	AT1|ATA|ATC|ATD|ATDC|ATE|TEL1|TELO1	HGNC:795|MIM:607585|Ensembl:ENSG00000149311|HPRD:06347|Vega:OTTHUMG00000166480	11	11q22-q23	ataxia telangiectasia mutated	protein-coding	ATM	ataxia telangiectasia mutated	O	A-T mutated|AT mutated|TEL1, telomere maintenance 1, homolog|serine-protein kinase ATM	20130512
9606	473	RERE	RP11-141M15.2	ARG|ARP|ATN1L|DNB1	HGNC:9965|MIM:605226|Ensembl:ENSG00000142599|HPRD:05566|Vega:OTTHUMG00000001765	1	1p36.23	arginine-glutamic acid dipeptide (RE) repeats	protein-coding	RERE	arginine-glutamic acid dipeptide (RE) repeats	O	arginine-glutamic acid dipeptide repeats protein|atrophin 2|atrophin-1 like protein|atrophin-1 related protein|atrophin-1-like protein|atrophin-1-related protein	20130505
9606	474	ATOH1	-	ATH1|HATH1|MATH-1|bHLHa14	HGNC:797|MIM:601461|Ensembl:ENSG00000172238|HPRD:03270|Vega:OTTHUMG00000130972	4	4q22	atonal homolog 1 (Drosophila)	protein-coding	ATOH1	atonal homolog 1 (Drosophila)	O	class A basic helix-loop-helix protein 14|helix-loop-helix protein hATH-1|protein atonal homolog 1	20130317
9606	475	ATOX1	-	ATX1|HAH1	HGNC:798|MIM:602270|Ensembl:ENSG00000177556|HPRD:03779	5	5q32	antioxidant 1 copper chaperone	protein-coding	ATOX1	antioxidant 1 copper chaperone	O	ATX1 antioxidant protein 1 homolog|copper transport protein ATOX1|metal transport protein ATX1	20130505
9606	476	ATP1A1	RP4-655J12.1	-	HGNC:799|MIM:182310|Ensembl:ENSG00000163399|HPRD:01662|Vega:OTTHUMG00000012109	1	1p21	ATPase, Na+/K+ transporting, alpha 1 polypeptide	protein-coding	ATP1A1	ATPase, Na+/K+ transporting, alpha 1 polypeptide	O	Na(+)/K(+) ATPase alpha-1 subunit|Na+, K+ ATPase alpha subunit|Na+/K+ ATPase 1|Na, K-ATPase, alpha-A catalytic polypeptide|Na,K-ATPase alpha-1 subunit|Na,K-ATPase catalytic subunit alpha-A protein|sodium pump 1|sodium pump subunit alpha-1|sodium-potassium ATPase catalytic subunit alpha-1|sodium-potassium-ATPase, alpha 1 polypeptide|sodium/potassium-transporting ATPase subunit alpha-1	20130505
9606	477	ATP1A2	RP11-536C5.4	FHM2|MHP2	HGNC:800|MIM:182340|Ensembl:ENSG00000018625|HPRD:01665|Vega:OTTHUMG00000024080	1	1q23.2	ATPase, Na+/K+ transporting, alpha 2 polypeptide	protein-coding	ATP1A2	ATPase, Na+/K+ transporting, alpha 2 polypeptide	O	Na(+)/K(+) ATPase alpha-2 subunit|Na+/K+ ATPase, alpha-A(+) catalytic polypeptide|Na+/K+ ATPase, alpha-B polypeptide|sodium pump subunit alpha-2|sodium-potassium ATPase catalytic subunit alpha-2|sodium/potassium-transporting ATPase alpha-2 chain|sodium/potassium-transporting ATPase subunit alpha-2	20130505
9606	478	ATP1A3	-	AHC2|DYT12|RDP	HGNC:801|MIM:182350|Ensembl:ENSG00000105409|HPRD:01666|Vega:OTTHUMG00000137384	19	19q13.31	ATPase, Na+/K+ transporting, alpha 3 polypeptide	protein-coding	ATP1A3	ATPase, Na+/K+ transporting, alpha 3 polypeptide	O	Na(+)/K(+) ATPase alpha(III) subunit|Na(+)/K(+) ATPase alpha-3 subunit|Na+/K+ ATPase 3|sodium pump subunit alpha-3|sodium-potassium ATPase catalytic subunit alpha-3|sodium-potassium-ATPase, alpha 3 polypeptide|sodium/potassium-transporting ATPase alpha-3 chain|sodium/potassium-transporting ATPase subunit alpha-3	20130505
9606	479	ATP12A	-	ATP1AL1	HGNC:13816|MIM:182360|Ensembl:ENSG00000075673|HPRD:01667|Vega:OTTHUMG00000016588	13	13q12.12|13q12.1-q12.3	ATPase, H+/K+ transporting, nongastric, alpha polypeptide	protein-coding	ATP12A	ATPase, H+/K+ transporting, nongastric, alpha polypeptide	O	ATPase, Na+/K+ transporting, alpha polypeptide-like 1|non-gastric H(+)/K(+) ATPase alpha subunit|non-gastric H(+)/K(+) ATPase subunit alpha|potassium-transporting ATPase alpha chain 2|proton pump	20130505
9606	480	ATP1A4	RP11-536C5.5	ATP1A1|ATP1AL2	HGNC:14073|MIM:607321|Ensembl:ENSG00000132681|HPRD:09541|Vega:OTTHUMG00000031609	1	1q23.2	ATPase, Na+/K+ transporting, alpha 4 polypeptide	protein-coding	ATP1A4	ATPase, Na+/K+ transporting, alpha 4 polypeptide	O	ATPase, Na+/K+ transporting, alpha polypeptide-like 2|Na(+)/K(+) ATPase alpha-4 subunit|Na+/K+ ATPase 4|Na+/K+ ATPase, alpha-D polypeptide|Na,K-ATPase subunit alpha-C|sodium pump 4|sodium pump subunit alpha-4|sodium-potassium ATPase catalytic subunit alpha-4|sodium/potassium-transporting ATPase alpha-4 chain|sodium/potassium-transporting ATPase subunit alpha-4	20130505
9606	481	ATP1B1	-	ATP1B	HGNC:804|MIM:182330|Ensembl:ENSG00000143153|HPRD:01663|Vega:OTTHUMG00000034590	1	1q24	ATPase, Na+/K+ transporting, beta 1 polypeptide	protein-coding	ATP1B1	ATPase, Na+/K+ transporting, beta 1 polypeptide	O	Beta 1-subunit of Na(+),K(+)-ATPase|Na, K-ATPase beta-1 polypeptide|adenosinetriphosphatase|sodium pump subunit beta-1|sodium-potassium ATPase subunit beta 1 (non-catalytic)|sodium/potassium-dependent ATPase beta-1 subunit|sodium/potassium-transporting ATPase beta-1 chain|sodium/potassium-transporting ATPase subunit beta-1	20130505
9606	482	ATP1B2	-	AMOG	HGNC:805|MIM:182331|Ensembl:ENSG00000129244|HPRD:01664|Vega:OTTHUMG00000178018	17	17p13.1	ATPase, Na+/K+ transporting, beta 2 polypeptide	protein-coding	ATP1B2	ATPase, Na+/K+ transporting, beta 2 polypeptide	O	Na, K-ATPase beta-2 polypeptide|adhesion molecule in glia|adhesion molecule on glia|sodium pump subunit beta-2|sodium-potassium ATPase subunit beta 2 (non-catalytic)|sodium/potassium-dependent ATPase beta-2 subunit|sodium/potassium-dependent ATPase subunit beta-2|sodium/potassium-transporting ATPase beta-2 chain|sodium/potassium-transporting ATPase subunit beta-2	20130505
9606	483	ATP1B3	-	ATPB-3|CD298	HGNC:806|MIM:601867|Ensembl:ENSG00000069849|HPRD:03521|Vega:OTTHUMG00000159081	3	3q23	ATPase, Na+/K+ transporting, beta 3 polypeptide	protein-coding	ATP1B3	ATPase, Na+/K+ transporting, beta 3 polypeptide	O	Na, K-ATPase beta-3 polypeptide|sodium pump subunit beta-3|sodium-potassium ATPase subunit beta 3 (non-catalytic)|sodium/potassium-dependent ATPase beta-3 subunit|sodium/potassium-dependent ATPase subunit beta-3|sodium/potassium-transporting ATPase beta-3 chain|sodium/potassium-transporting ATPase subunit beta-3	20130505
9606	484	ATP1B3P1	-	-	HGNC:807	2	2p16.1	ATPase, Na+/K+ transporting, beta 3 pseudogene	pseudo	ATP1B3P1	ATPase, Na+/K+ transporting, beta 3 pseudogene	O	-	20130226
9606	485	ATP1B1P1	-	ATP1BL1	HGNC:809	4	4p13	ATPase, Na+/K+ transporting, beta 1 polypeptide pseudogene 1	pseudo	ATP1B1P1	ATPase, Na+/K+ transporting, beta 1 polypeptide pseudogene 1	O	-	20130226
9606	486	FXYD2	-	ATP1G1|HOMG2	HGNC:4026|MIM:601814|Ensembl:ENSG00000137731|HPRD:03487|Vega:OTTHUMG00000166990	11	11q23	FXYD domain containing ion transport regulator 2	protein-coding	FXYD2	FXYD domain containing ion transport regulator 2	O	ATPase, Na+/K+ transporting, gamma 1 polypeptide|Na(+)/K(+) ATPase subunit gamma|sodium pump gamma chain|sodium/potassium-transporting ATPase subunit gamma	20130504
9606	487	ATP2A1	-	ATP2A|SERCA1	HGNC:811|MIM:108730|Ensembl:ENSG00000196296|HPRD:00157|Vega:OTTHUMG00000131760	16	16p12.1	ATPase, Ca++ transporting, cardiac muscle, fast twitch 1	protein-coding	ATP2A1	ATPase, Ca++ transporting, cardiac muscle, fast twitch 1	O	SR Ca(2+)-ATPase 1|calcium pump 1|calcium-transporting ATPase sarcoplasmic reticulum type, fast twitch skeletal muscle isoform|endoplasmic reticulum class 1/2 Ca(2+) ATPase|sarcoplasmic/endoplasmic reticulum calcium ATPase 1	20130505
9606	488	ATP2A2	-	ATP2B|DAR|DD|SERCA2	HGNC:812|MIM:108740|Ensembl:ENSG00000174437|HPRD:00161|Vega:OTTHUMG00000169327	12	12q24.11	ATPase, Ca++ transporting, cardiac muscle, slow twitch 2	protein-coding	ATP2A2	ATPase, Ca++ transporting, cardiac muscle, slow twitch 2	O	ATPase, Ca++ dependent, slow-twitch, cardiac muscle-2|SR Ca(2+)-ATPase 2|calcium pump 2|calcium-transporting ATPase sarcoplasmic reticulum type, slow twitch skeletal muscle isoform|cardiac Ca2+ ATPase|endoplasmic reticulum class 1/2 Ca(2+) ATPase|sarcoplasmic/endoplasmic reticulum calcium ATPase 2	20130505
9606	489	ATP2A3	-	SERCA3	HGNC:813|MIM:601929|Ensembl:ENSG00000074370|HPRD:03568|Vega:OTTHUMG00000177674	17	17p13.3	ATPase, Ca++ transporting, ubiquitous	protein-coding	ATP2A3	ATPase, Ca++ transporting, ubiquitous	O	ATPase, Ca(2+)-transporting, ubiquitous|SR Ca(2+)-ATPase 3|adenosine triphosphatase, calcium|calcium pump 3|calcium-translocating P-type ATPase|sarco/endoplasmic reticulum Ca2+ -ATPase|sarcoplasmic/endoplasmic reticulum calcium ATPase 3	20130505
9606	490	ATP2B1	-	PMCA1|PMCA1kb	HGNC:814|MIM:108731|Ensembl:ENSG00000070961|HPRD:00158|Vega:OTTHUMG00000169946	12	12q21.3	ATPase, Ca++ transporting, plasma membrane 1	protein-coding	ATP2B1	ATPase, Ca++ transporting, plasma membrane 1	O	plasma membrane calcium pump|plasma membrane calcium-transporting ATPase 1	20130505
9606	491	ATP2B2	-	PMCA2|PMCA2a|PMCA2i	HGNC:815|MIM:108733|Ensembl:ENSG00000157087|HPRD:00160|Vega:OTTHUMG00000128679	3	3p25.3	ATPase, Ca++ transporting, plasma membrane 2	protein-coding	ATP2B2	ATPase, Ca++ transporting, plasma membrane 2	O	plasma membrane Ca(2+)-ATPase|plasma membrane Ca2+ pump 2|plasma membrane calcium ATPase|plasma membrane calcium pump|plasma membrane calcium-transporting ATPase 2	20130505
9606	492	ATP2B3	-	PMCA3|PMCA3a|SCAX1	HGNC:816|MIM:300014|Ensembl:ENSG00000067842|HPRD:02057|Vega:OTTHUMG00000024202	X	Xq28	ATPase, Ca++ transporting, plasma membrane 3	protein-coding	ATP2B3	ATPase, Ca++ transporting, plasma membrane 3	O	plasma membrane calcium ATPase|plasma membrane calcium pump|plasma membrane calcium-transporting ATPase 3	20130505
9606	493	ATP2B4	-	ATP2B2|MXRA1|PMCA4|PMCA4b|PMCA4x	HGNC:817|MIM:108732|Ensembl:ENSG00000058668|HPRD:00159|Vega:OTTHUMG00000035906	1	1q32.1	ATPase, Ca++ transporting, plasma membrane 4	protein-coding	ATP2B4	ATPase, Ca++ transporting, plasma membrane 4	O	matrix-remodeling-associated protein 1|plasma membrane calcium-transporting ATPase 4|sarcolemmal calcium pump	20130505
9606	495	ATP4A	-	ATP6A	HGNC:819|MIM:137216|Ensembl:ENSG00000105675|HPRD:00668|Vega:OTTHUMG00000048106	19	19q13.1	ATPase, H+/K+ exchanging, alpha polypeptide	protein-coding	ATP4A	ATPase, H+/K+ exchanging, alpha polypeptide	O	ATPase, H+/K+ transporting, alpha polypeptide|H(+)-K(+)-ATPase alpha subunit|gastric H(+)/K(+) ATPase subunit alpha|gastric H+/K+ ATPase alpha subunit|gastric H,K-ATPase alpha subunit|gastric H,K-ATPase catalytic subunit|gastric hydrogen-potassium ATPase|potassium-transporting ATPase alpha chain 1|proton pump	20130505
9606	496	ATP4B	RP11-230F18.4	ATP6B	HGNC:820|MIM:137217|Ensembl:ENSG00000186009|HPRD:00669|Vega:OTTHUMG00000140234	13	13q34	ATPase, H+/K+ exchanging, beta polypeptide	protein-coding	ATP4B	ATPase, H+/K+ exchanging, beta polypeptide	O	ATPase, H+/K+ transporting, beta polypeptide|gastric H(+)/K(+) ATPase subunit beta|gastric H+/K+ ATPase beta subunit|gastric hydrogen-potassium ATPase, beta|potassium-transporting ATPase beta chain|potassium-transporting ATPase subunit beta|proton pump beta chain	20130505
9606	498	ATP5A1	-	ATP5A|ATP5AL2|ATPM|MOM2|OMR|ORM|hATP1	HGNC:823|MIM:164360|Ensembl:ENSG00000152234|HPRD:01258|Vega:OTTHUMG00000132637	18	18q21	ATP synthase, H+ transporting, mitochondrial F1 complex, alpha subunit 1, cardiac muscle	protein-coding	ATP5A1	ATP synthase, H+ transporting, mitochondrial F1 complex, alpha subunit 1, cardiac muscle	O	ATP synthase alpha chain, mitochondrial|ATP synthase subunit alpha, mitochondrial|ATP synthase, H+ transporting, mitochondrial F1 complex, alpha subunit, isoform 1, cardiac muscle|ATP synthase, H+ transporting, mitochondrial F1 complex, alpha subunit, isoform 2, non-cardiac muscle-like 2|ATP sythase (F1-ATPase) alpha subunit|mitochondrial ATP synthetase, oligomycin-resistant	20130505
9606	501	ALDH7A1	-	ATQ1|EPD|PDE	HGNC:877|MIM:107323|Ensembl:ENSG00000164904|HPRD:00124|Vega:OTTHUMG00000128942	5	5q31	aldehyde dehydrogenase 7 family, member A1	protein-coding	ALDH7A1	aldehyde dehydrogenase 7 family, member A1	O	26g turgor protein homolog|P6c dehydrogenase|alpha-AASA dehydrogenase|alpha-aminoadipic semialdehyde dehydrogenase|antiquitin-1|betaine aldehyde dehydrogenase|delta1-piperideine-6-carboxylate dehydrogenase	20130505
9606	504	ATP5A1P2	-	ATP5AP2	HGNC:828	2	2q24.1	ATP synthase, H+ transporting, mitochondrial F1 complex, alpha subunit 1 pseudogene 2	pseudo	ATP5A1P2	ATP synthase, H+ transporting, mitochondrial F1 complex, alpha subunit 1 pseudogene 2	O	-	20130226
9606	506	ATP5B	-	ATPMB|ATPSB	HGNC:830|MIM:102910|Ensembl:ENSG00000110955|HPRD:00044|Vega:OTTHUMG00000170291	12	12q13.13	ATP synthase, H+ transporting, mitochondrial F1 complex, beta polypeptide	protein-coding	ATP5B	ATP synthase, H+ transporting, mitochondrial F1 complex, beta polypeptide	O	ATP synthase subunit beta, mitochondrial|mitochondrial ATP synthase beta subunit|mitochondrial ATP synthetase, beta subunit	20130505
9606	507	ATP5BP1	-	ATP5BL1|ATPMBL1|ATPSBL1	HGNC:831	2	2q11.2	ATP synthase, H+ transporting, mitochondrial F1 complex, beta polypeptide pseudogene 1	pseudo	ATP5BP1	ATP synthase, H+ transporting, mitochondrial F1 complex, beta polypeptide pseudogene 1	O	-	20130226
9606	509	ATP5C1	RP11-401E9.1	ATP5C|ATP5CL1	HGNC:833|MIM:108729|Ensembl:ENSG00000165629|HPRD:00156|Vega:OTTHUMG00000017639	10	10p15.1	ATP synthase, H+ transporting, mitochondrial F1 complex, gamma polypeptide 1	protein-coding	ATP5C1	ATP synthase, H+ transporting, mitochondrial F1 complex, gamma polypeptide 1	O	ATP synthase gamma chain, mitochondrial|ATP synthase subunit gamma, mitochondrial|F-ATPase gamma subunit|mitochondrial ATP synthase, gamma subunit 1	20130505
9606	513	ATP5D	-	-	HGNC:837|MIM:603150|Ensembl:ENSG00000099624|HPRD:04397|Vega:OTTHUMG00000180143	19	19p13.3	ATP synthase, H+ transporting, mitochondrial F1 complex, delta subunit	protein-coding	ATP5D	ATP synthase, H+ transporting, mitochondrial F1 complex, delta subunit	O	ATP synthase subunit delta, mitochondrial|F-ATPase delta subunit|mitochondrial ATP synthase complex delta-subunit precusor|mitochondrial ATP synthase, delta subunit	20130505
9606	514	ATP5E	-	ATPE|MC5DN3	HGNC:838|MIM:606153|HPRD:05856	20	20q13.32	ATP synthase, H+ transporting, mitochondrial F1 complex, epsilon subunit	protein-coding	ATP5E	ATP synthase, H+ transporting, mitochondrial F1 complex, epsilon subunit	O	ATP synthase subunit epsilon, mitochondrial|F(0)F(1)-ATPase|H(+)-transporting two-sector ATPase|mitochondrial ATP synthase epsilon chain|mitochondrial ATPase	20130505
9606	515	ATP5F1	RP11-552M11.5	PIG47	HGNC:840|MIM:603270|HPRD:04467	1	1p13.2	ATP synthase, H+ transporting, mitochondrial Fo complex, subunit B1	protein-coding	ATP5F1	ATP synthase, H+ transporting, mitochondrial Fo complex, subunit B1	O	ATP synthase B chain, mitochondrial|ATP synthase subunit b, mitochondrial|ATP synthase, H+ transporting, mitochondrial F0 complex, subunit B1|ATP synthase, H+ transporting, mitochondrial F0 complex, subunit b|ATPase subunit b|H+-ATP synthase subunit b|cell proliferation-inducing protein 47	20130505
9606	516	ATP5G1	-	ATP5A|ATP5G	HGNC:841|MIM:603192|Ensembl:ENSG00000159199|HPRD:04428|Vega:OTTHUMG00000160520	17	17q21.32	ATP synthase, H+ transporting, mitochondrial Fo complex, subunit C1 (subunit 9)	protein-coding	ATP5G1	ATP synthase, H+ transporting, mitochondrial Fo complex, subunit C1 (subunit 9)	O	ATP synthase lipid-binding protein, mitochondrial|ATP synthase proteolipid P1|ATP synthase, H+ transporting, mitochondrial F0 complex, subunit C1 (subunit 9)|ATP synthase, H+ transporting, mitochondrial F0 complex, subunit c (subunit 9)|ATPase protein 9|ATPase subunit 9|ATPase subunit C|mitochondrial ATP synthase, subunit 9|mitochondrial ATP synthase, subunit C	20130505
9606	517	ATP5G2	PSEC0033	ATP5A	HGNC:842|MIM:603193|Ensembl:ENSG00000135390|HPRD:04429|Vega:OTTHUMG00000133442	12	12q13.13	ATP synthase, H+ transporting, mitochondrial Fo complex, subunit C2 (subunit 9)	protein-coding	ATP5G2	ATP synthase, H+ transporting, mitochondrial Fo complex, subunit C2 (subunit 9)	O	ATP synthase c subunit|ATP synthase lipid-binding protein, mitochondrial|ATP synthase proteolipid P2|ATP synthase, H+ transporting, mitochondrial F0 complex, subunit C2 (subunit 9)|ATP synthase, H+ transporting, mitochondrial F0 complex, subunit c (subunit 9)|ATPase protein 9|ATPase subunit C|mitochondrial ATP synthase, subunit C (subunit 9)	20130505
9606	518	ATP5G3	-	P3	HGNC:843|MIM:602736|HPRD:04112	2	2q31.1	ATP synthase, H+ transporting, mitochondrial Fo complex, subunit C3 (subunit 9)	protein-coding	ATP5G3	ATP synthase, H+ transporting, mitochondrial Fo complex, subunit C3 (subunit 9)	O	ATP synthase lipid-binding protein, mitochondrial|ATP synthase proteolipid P3|ATP synthase subunit 9|ATP synthase, H+ transporting, mitochondrial F0 complex, subunit C3 (subunit 9)|ATP synthase, mitochondrial, C subunit-3|ATPase protein 9|ATPase subunit C	20130505
9606	520	ATP5G2P1	-	ATP5GP1	HGNC:844	1	1q32.2	ATP synthase, H+ transporting, mitochondrial Fo complex, subunit C2 (subunit 9) pseudogene 1	pseudo	ATP5G2P1	ATP synthase, H+ transporting, mitochondrial Fo complex, subunit C2 (subunit 9) pseudogene 1	O	-	20130226
9606	521	ATP5I	-	ATP5K	HGNC:846|MIM:601519|Ensembl:ENSG00000169020|HPRD:03308|Vega:OTTHUMG00000086929	4	4p16.3	ATP synthase, H+ transporting, mitochondrial Fo complex, subunit E	protein-coding	ATP5I	ATP synthase, H+ transporting, mitochondrial Fo complex, subunit E	O	ATP synthase e chain, mitochondrial|ATP synthase subunit e, mitochondrial|ATP synthase, H+ transporting, mitochondrial F0 complex, subunit E|ATPase subunit e|F1F0-ATP synthase, murine e subunit	20130505
9606	522	ATP5J	-	ATP5|ATP5A|ATPM|CF6|F6	HGNC:847|MIM:603152|Ensembl:ENSG00000154723|HPRD:04399|Vega:OTTHUMG00000078442	21	21q21.1	ATP synthase, H+ transporting, mitochondrial Fo complex, subunit F6	protein-coding	ATP5J	ATP synthase, H+ transporting, mitochondrial Fo complex, subunit F6	O	ATP synthase, H+ transporting, mitochondrial F0 complex, subunit F6|ATP synthase-coupling factor 6, mitochondrial|ATPase subunit F6|coupling factor 6|mitochondrial ATP synthase, coupling factor 6|mitochondrial ATP synthase, subunit F6|mitochondrial ATPase coupling factor 6|proliferation-inducing protein 36	20130505
9606	523	ATP6V1A	-	ATP6A1|ATP6V1A1|HO68|VA68|VPP2|Vma1	HGNC:851|MIM:607027|Ensembl:ENSG00000114573|HPRD:06120|Vega:OTTHUMG00000159295	3	3q13.31	ATPase, H+ transporting, lysosomal 70kDa, V1 subunit A	protein-coding	ATP6V1A	ATPase, H+ transporting, lysosomal 70kDa, V1 subunit A	O	ATPase, H+ transporting, lysosomal, subunit A1|H(+)-transporting two-sector ATPase, subunit A|H+-transporting ATPase chain A, vacuolar (VA68 type)|V-ATPase 69 kDa subunit 1|V-ATPase A subunit 1|V-ATPase subunit A|V-type proton ATPase catalytic subunit A|vacuolar ATP synthase catalytic subunit A, ubiquitous isoform|vacuolar ATPase isoform VA68|vacuolar proton pump alpha subunit 1|vacuolar proton p…	20130505
9606	525	ATP6V1B1	-	ATP6B1|RTA1B|VATB|VMA2|VPP3	HGNC:853|MIM:192132|Ensembl:ENSG00000116039|HPRD:01887|Vega:OTTHUMG00000129711	2	2p13.1	ATPase, H+ transporting, lysosomal 56/58kDa, V1 subunit B1	protein-coding	ATP6V1B1	ATPase, H+ transporting, lysosomal 56/58kDa, V1 subunit B1	O	H(+)-transporting two-sector ATPase, 58kD subunit|H+-ATPase beta 1 subunit|V-ATPase B1 subunit|V-ATPase subunit B 1|V-type proton ATPase subunit B, kidney isoform|endomembrane proton pump 58 kDa subunit|vacuolar proton pump 3|vacuolar proton pump subunit B 1|vacuolar proton pump, subunit 3	20130505
9606	526	ATP6V1B2	-	ATP6B1B2|ATP6B2|HO57|VATB|VPP3|Vma2	HGNC:854|MIM:606939|Ensembl:ENSG00000147416|HPRD:06088|Vega:OTTHUMG00000131073	8	8p21.3	ATPase, H+ transporting, lysosomal 56/58kDa, V1 subunit B2	protein-coding	ATP6V1B2	ATPase, H+ transporting, lysosomal 56/58kDa, V1 subunit B2	O	H+ transporting two-sector ATPase|V-ATPase B2 subunit|V-ATPase subunit B 2|V-type proton ATPase subunit B, brain isoform|endomembrane proton pump 58 kDa subunit|vacuolar H+-ATPase 56,000 subunit|vacuolar proton pump subunit B 2	20130505
9606	527	ATP6V0C	-	ATP6C|ATP6L|ATPL|VATL|VPPC|Vma3	HGNC:855|MIM:108745|Ensembl:ENSG00000185883|HPRD:00162|Vega:OTTHUMG00000128865	16	16p13.3	ATPase, H+ transporting, lysosomal 16kDa, V0 subunit c	protein-coding	ATP6V0C	ATPase, H+ transporting, lysosomal 16kDa, V0 subunit c	O	H(+)-transporting two-sector ATPase, 16 kDa subunit|V-ATPase 16 kDa proteolipid subunit|V-type proton ATPase 16 kDa proteolipid subunit|vacuolar ATP synthase 16 kDa proteolipid subunit|vacuolar H+ ATPase proton channel subunit|vacuolar proton pump 16 kDa proteolipid subunit	20130505
9606	528	ATP6V1C1	-	ATP6C|ATP6D|VATC|Vma5	HGNC:856|MIM:603097|Ensembl:ENSG00000155097|HPRD:04371|Vega:OTTHUMG00000164761	8	8q22.3	ATPase, H+ transporting, lysosomal 42kDa, V1 subunit C1	protein-coding	ATP6V1C1	ATPase, H+ transporting, lysosomal 42kDa, V1 subunit C1	O	H(+)-transporting two-sector ATPase, subunit C|H+ -ATPase C subunit|H+-transporting ATPase chain C, vacuolar|V-ATPase C subunit|V-ATPase subunit C 1|V-type proton ATPase subunit C 1|subunit C of vacuolar proton-ATPase V1 domain|vacuolar ATP synthase subunit C|vacuolar proton pump C subunit|vacuolar proton pump subunit C 1|vacuolar proton pump, 42-kD subunit|vacuolar proton-ATPase, subunit C, VI d…	20130505
9606	529	ATP6V1E1	-	ATP6E|ATP6E2|ATP6V1E|P31|Vma4	HGNC:857|MIM:108746|Ensembl:ENSG00000131100|HPRD:00163|Vega:OTTHUMG00000059320	22	22q11.1	ATPase, H+ transporting, lysosomal 31kDa, V1 subunit E1	protein-coding	ATP6V1E1	ATPase, H+ transporting, lysosomal 31kDa, V1 subunit E1	O	H(+)-transporting two-sector ATPase, 31kDa subunit|H+-transporting ATP synthase chain E, vacuolar|V-ATPase 31 kDa subunit|V-ATPase subunit E 1|V-ATPase, subunit E|V-type proton ATPase subunit E 1|vacuolar proton pump subunit E 1	20130505
9606	533	ATP6V0B	RP11-7O11.6	ATP6F|HATPL|VMA16	HGNC:861|MIM:603717|Ensembl:ENSG00000117410|HPRD:04759|Vega:OTTHUMG00000008298	1	1p32.3	ATPase, H+ transporting, lysosomal 21kDa, V0 subunit b	protein-coding	ATP6V0B	ATPase, H+ transporting, lysosomal 21kDa, V0 subunit b	O	H(+)-transporting two-sector ATPase, subunit F|V-ATPase 21 kDa proteolipid subunit|V-ATPase subunit c''|V-type proton ATPase 21 kDa proteolipid subunit|vacuolar ATP synthase 21 kDa proteolipid subunit|vacuolar proton pump 21 kDa proteolipid subunit|vacuolar proton pump, 21 kDa subunit	20130505
9606	534	ATP6V1G2	DADB-26I14.6	ATP6G|ATP6G2|NG38|VMA10	HGNC:862|MIM:606853|Ensembl:ENSG00000213760|HPRD:06030|Vega:OTTHUMG00000166618	6	6p21.3	ATPase, H+ transporting, lysosomal 13kDa, V1 subunit G2	protein-coding	ATP6V1G2	ATPase, H+ transporting, lysosomal 13kDa, V1 subunit G2	O	ATPase, H+ transporting, lysosomal (vacuolar proton pump)|H(+)-transporting two-sector ATPase, subunit G2|V-ATPase 13 kDa subunit 2|V-type proton ATPase subunit G 2|vacuolar ATP synthase subunit G 2|vacuolar proton pump G subunit 2	20130505
9606	535	ATP6V0A1	-	ATP6N1|ATP6N1A|Stv1|VPP1|Vph1|a1	HGNC:865|MIM:192130|Ensembl:ENSG00000033627|HPRD:01886|Vega:OTTHUMG00000180238	17	17q21	ATPase, H+ transporting, lysosomal V0 subunit a1	protein-coding	ATP6V0A1	ATPase, H+ transporting, lysosomal V0 subunit a1	O	ATPase, H+ transporting, lysosomal (vacuolar proton pump) non-catalytic accessory protein 1A (110/116kD)|ATPase, H+ transporting, lysosomal non-catalytic accessory protein 1 (110/116kD)|H(+)-transporting two-sector ATPase, 116 kDa accessory protein A1|V-ATPase 116 kDa|V-type proton ATPase 116 kDa subunit a|V-type proton ATPase 116 kDa subunit a isoform 1|clathrin-coated vesicle/synaptic vesicle p…	20130505
9606	537	ATP6AP1	XX-FW83563B9.4	16A|ATP6IP1|ATP6S1|Ac45|CF2|VATPS1|XAP-3|XAP3	HGNC:868|MIM:300197|Ensembl:ENSG00000071553|HPRD:02184|Vega:OTTHUMG00000033291	X	Xq28	ATPase, H+ transporting, lysosomal accessory protein 1	protein-coding	ATP6AP1	ATPase, H+ transporting, lysosomal accessory protein 1	O	ATPase, H+ transporting, lysosomal (vacuolar proton pump), subunit 1|ATPase, H+ transporting, lysosomal interacting protein 1|H-ATPase subunit|V-ATPase Ac45 subunit|V-ATPase S1 accessory protein|V-ATPase subunit S1|V-type proton ATPase subunit S1|protein XAP-3|vacuolar proton pump subunit S1	20130512
9606	538	ATP7A	RP3-465G10.1	DSMAX|MK|MNK|SMAX3	HGNC:869|MIM:300011|Ensembl:ENSG00000165240|HPRD:02054|Vega:OTTHUMG00000021885	X	Xq21.1	ATPase, Cu++ transporting, alpha polypeptide	protein-coding	ATP7A	ATPase, Cu++ transporting, alpha polypeptide	O	Cu++-transporting P-type ATPase|Menkes disease-associated protein|copper pump 1|copper-transporting ATPase 1	20130505
9606	539	ATP5O	-	ATPO|OSCP	HGNC:850|MIM:600828|Ensembl:ENSG00000241837|HPRD:02899|Vega:OTTHUMG00000065186	21	21q22.11	ATP synthase, H+ transporting, mitochondrial F1 complex, O subunit	protein-coding	ATP5O	ATP synthase, H+ transporting, mitochondrial F1 complex, O subunit	O	ATP synthase subunit O, mitochondrial|human ATP synthase OSCP subunit|oligomycin sensitivity conferral protein|oligomycin sensitivity conferring protein	20130505
9606	540	ATP7B	RP11-327P2.1	PWD|WC1|WD|WND	HGNC:870|MIM:606882|Ensembl:ENSG00000123191|HPRD:06050|Vega:OTTHUMG00000017406	13	13q14.3	ATPase, Cu++ transporting, beta polypeptide	protein-coding	ATP7B	ATPase, Cu++ transporting, beta polypeptide	O	ATPase, Cu(2+)- transporting, beta polypeptide|Wilson disease-associated protein|copper pump 2|copper-transporting ATPase 2	20130505
9606	541	ALDH7A1P1	-	ATQL1	HGNC:878	5	5q14	aldehyde dehydrogenase 7 family, member A1 pseudogene 1	pseudo	ALDH7A1P1	aldehyde dehydrogenase 7 family, member A1 pseudogene 1	O	-	20130226
9606	542	ALDH7A1P2	-	ATQL2	HGNC:879	2	2q31.1	aldehyde dehydrogenase 7 family, member A1 pseudogene 2	pseudo	ALDH7A1P2	aldehyde dehydrogenase 7 family, member A1 pseudogene 2	O	-	20130226
9606	543	ALDH7A1P3	-	ATQL3	HGNC:880	7	7q36	aldehyde dehydrogenase 7 family, member A1 pseudogene 3	pseudo	ALDH7A1P3	aldehyde dehydrogenase 7 family, member A1 pseudogene 3	O	-	20130226
9606	544	ALDH7A1P4	-	ATQL4	HGNC:881	10	10q21	aldehyde dehydrogenase 7 family, member A1 pseudogene 4	pseudo	ALDH7A1P4	aldehyde dehydrogenase 7 family, member A1 pseudogene 4	O	-	20130226
9606	545	ATR	-	FCTCS|FRP1|MEC1|SCKL|SCKL1	HGNC:882|MIM:601215|Ensembl:ENSG00000175054|HPRD:08369|Vega:OTTHUMG00000159234	3	3q23	ataxia telangiectasia and Rad3 related	protein-coding	ATR	ataxia telangiectasia and Rad3 related	O	FRAP-related protein 1|FRAP-related protein-1|MEC1, mitosis entry checkpoint 1, homolog|Rad3 related protein|ataxia telangiectasia and Rad3-related protein|protein kinase ATR|serine/threonine-protein kinase ATR	20130512
9606	546	ATRX	RP5-875J14.1	ATR2|JMS|MRXHF1|RAD54|RAD54L|SFM1|SHS|XH2|XNP|ZNF-HX	HGNC:886|MIM:300032|Ensembl:ENSG00000085224|HPRD:02069|Vega:OTTHUMG00000022686	X	Xq21.1	alpha thalassemia/mental retardation syndrome X-linked	protein-coding	ATRX	alpha thalassemia/mental retardation syndrome X-linked	O	ATP-dependent helicase ATRX|DNA dependent ATPase and helicase|RAD54 homolog|X-linked helicase II|X-linked nuclear protein|Zinc finger helicase|alpha thalassemia/mental retardation syndrome X-linked (RAD54 homolog, S. cerevisiae)|helicase 2, X-linked|transcriptional regulator ATRX	20130512
9606	547	KIF1A	-	ATSV|C2orf20|HSN2C|MRD9|SPG30|UNC104	HGNC:888|MIM:601255|Ensembl:ENSG00000130294|HPRD:03156|Vega:OTTHUMG00000151940	2	2q37.3	kinesin family member 1A	protein-coding	KIF1A	kinesin family member 1A	O	axonal transporter of synaptic vesicles|kinesin, heavy chain, member 1A, homolog of mouse|kinesin-like protein KIF1A|microtubule-based motor KIF1A|tmp_locus_27|unc-104- and KIF1A-related protein	20130505
9606	549	AUH	-	-	HGNC:890|MIM:600529|Ensembl:ENSG00000148090|HPRD:08987|Vega:OTTHUMG00000020207	9	9q22.31	AU RNA binding protein/enoyl-CoA hydratase	protein-coding	AUH	AU RNA binding protein/enoyl-CoA hydratase	O	3-methylglutaconyl-CoA hydratase|AU RNA binding protein/enoyl-Coenzyme A hydratase|AU RNA-binding protein/enoyl-Coenzyme A hydratase|AU-binding protein/Enoyl-CoA hydratase|AU-specific RNA-binding enoyl-CoA hydratase|methylglutaconyl-CoA hydratase, mitochondrial	20130505
9606	550	AUP1	-	-	HGNC:891|MIM:602434|Ensembl:ENSG00000115307|HPRD:03892|Vega:OTTHUMG00000129964	2	2p13	ancient ubiquitous protein 1	protein-coding	AUP1	ancient ubiquitous protein 1	O	-	20130505
9606	551	AVP	-	ADH|ARVP|AVP-NPII|AVRP|VP	HGNC:894|MIM:192340|Ensembl:ENSG00000101200|HPRD:01891|Vega:OTTHUMG00000031733	20	20p13	arginine vasopressin	protein-coding	AVP	arginine vasopressin	O	antidiuretic hormone|neurohypophyseal|prepro-AVP-NP II|prepro-arginine-vasopressin-neurophysin II|vasopressin-neurophysin 2-copeptin|vasopressin-neurophysin II-copeptin	20130505
9606	552	AVPR1A	-	AVPR V1a|AVPR1|V1aR	HGNC:895|MIM:600821|HPRD:02894	12	12q14-q15	arginine vasopressin receptor 1A	protein-coding	AVPR1A	arginine vasopressin receptor 1A	O	SCCL vasopressin subtype 1a receptor|V1-vascular vasopressin receptor AVPR1A|V1a vasopressin receptor|antidiuretic hormone receptor 1A|vascular/hepatic-type arginine vasopressin receptor|vasopressin V1a receptor	20130505
9606	553	AVPR1B	-	AVPR3	HGNC:896|MIM:600264|HPRD:02600	1	1q32	arginine vasopressin receptor 1B	protein-coding	AVPR1B	arginine vasopressin receptor 1B	O	AVPR V1b|AVPR V3|V1bR|antidiuretic hormone receptor 1B|arginine vasopressin receptor 3|pituitary vasopressin receptor 3|vasopressin V1b receptor|vasopressin V3 receptor	20130505
9606	554	AVPR2	-	ADHR|DI1|DIR|DIR3|NDI|V2R	HGNC:897|MIM:300538|Ensembl:ENSG00000126895|HPRD:02368|Vega:OTTHUMG00000024227	X	Xq28	arginine vasopressin receptor 2	protein-coding	AVPR2	arginine vasopressin receptor 2	O	AVPR V2|antidiuretic hormone receptor|renal-type arginine vasopressin receptor|vasopressin V2 receptor	20130505
9606	558	AXL	-	JTK11|UFO	HGNC:905|MIM:109135|Ensembl:ENSG00000167601|HPRD:00171|Vega:OTTHUMG00000182727	19	19q13.1	AXL receptor tyrosine kinase	protein-coding	AXL	AXL receptor tyrosine kinase	O	AXL oncogene|AXL transforming sequence/gene|oncogene AXL|tyrosine-protein kinase receptor UFO	20130512
9606	560	AZF1	-	AZF|AZFA|SP3	HGNC:908|MIM:415000	Y	Yq11	azoospermia factor 1	unknown	AZF1	azoospermia factor 1	O	-	20130226
9606	563	AZGP1	-	ZA2G|ZAG	HGNC:910|MIM:194460|Ensembl:ENSG00000160862|HPRD:01910|Vega:OTTHUMG00000023066	7	7q22.1	alpha-2-glycoprotein 1, zinc-binding	protein-coding	AZGP1	alpha-2-glycoprotein 1, zinc-binding	O	Alpha-2-glycoprotein, zinc|Zn-alpha2-glycoprotein|zinc-alpha-2-glycoprotein|zn-alpha-2-GP|zn-alpha-2-glycoprotein	20130505
9606	566	AZU1	-	AZAMP|AZU|CAP37|HBP|HUMAZUR|NAZC	HGNC:913|MIM:162815|Ensembl:ENSG00000172232|HPRD:01221|Vega:OTTHUMG00000181897	19	19p13.3	azurocidin 1	protein-coding	AZU1	azurocidin 1	O	azurocidin|cationic antimicrobial protein 37|cationic antimicrobial protein CAP37|heparin-binding protein|neutrophil azurocidin	20130505
9606	567	B2M	CDABP0092	-	HGNC:914|MIM:109700|HPRD:00189	15	15q21-q22.2	beta-2-microglobulin	protein-coding	B2M	beta-2-microglobulin	O	beta chain of MHC class I molecules|beta-2-microglobin	20130512
9606	568	B2MR	-	-	HGNC:915|MIM:109710	15	15q13-q15	beta-2-microglobulin regulator	unknown	B2MR	beta-2-microglobulin regulator	O	-	20130226
9606	570	BAAT	-	BACAT|BAT	HGNC:932|MIM:602938|Ensembl:ENSG00000136881|HPRD:08376	9	9q22.3	bile acid CoA: amino acid N-acyltransferase (glycine N-choloyltransferase)	protein-coding	BAAT	bile acid CoA: amino acid N-acyltransferase (glycine N-choloyltransferase)	O	bile acid Coenzyme A: amino acid N-acyltransferase (glycine N-choloyltransferase)|bile acid-CoA:amino acid N-acyltransferase|long-chain fatty-acyl-CoA hydrolase	20130505
9606	571	BACH1	-	BACH-1	HGNC:935|MIM:602751|Ensembl:ENSG00000156273|HPRD:04127|Vega:OTTHUMG00000078878	21	21q22.11	BTB and CNC homology 1, basic leucine zipper transcription factor 1	protein-coding	BACH1	BTB and CNC homology 1, basic leucine zipper transcription factor 1	O	BTB and CNC homolog 1|HA2303|basic region leucine zipper transcriptional regulator BACH1|transcription regulator protein BACH1	20130505
9606	572	BAD	-	BBC2|BCL2L8	HGNC:936|MIM:603167|Ensembl:ENSG00000002330|HPRD:04409|Vega:OTTHUMG00000134302	11	11q13.1	BCL2-associated agonist of cell death	protein-coding	BAD	BCL2-associated agonist of cell death	O	BCL-X/BCL-2 binding protein|BCL2-antagonist of cell death protein|BCL2-binding component 6|BCL2-binding protein|bcl-2-binding component 6|bcl-2-like protein 8|bcl-XL/Bcl-2-associated death promoter|bcl2 antagonist of cell death|bcl2-L-8	20130505
9606	573	BAG1	RP11-326F20.2	BAG-1|HAP|RAP46	HGNC:937|MIM:601497|Ensembl:ENSG00000107262|HPRD:03292	9	9p12	BCL2-associated athanogene	protein-coding	BAG1	BCL2-associated athanogene	O	BAG family molecular chaperone regulator 1|Bcl-2 associating athanogene-1 protein|Bcl-2-binding protein|glucocortoid receptor-associated protein RAP46|receptor-associated protein, 46-KD	20130512
9606	574	BAGE	-	BAGE1|CT2.1	HGNC:942|MIM:605167|HPRD:05523	21	21p11.1	B melanoma antigen	protein-coding	BAGE	B melanoma antigen	O	B melanoma antigen 1|antigen MZ2-BA|cancer/testis antigen 2.1|cancer/testis antigen family 2, member 1	20130226
9606	575	BAI1	-	GDAIF	HGNC:943|MIM:602682|Ensembl:ENSG00000181790|HPRD:04062|Vega:OTTHUMG00000164732	8	8q24.3	brain-specific angiogenesis inhibitor 1	protein-coding	BAI1	brain-specific angiogenesis inhibitor 1	O	-	20130505
9606	576	BAI2	RP11-73M7.7	-	HGNC:944|MIM:602683|Ensembl:ENSG00000121753|HPRD:04063|Vega:OTTHUMG00000003885	1	1p35	brain-specific angiogenesis inhibitor 2	protein-coding	BAI2	brain-specific angiogenesis inhibitor 2	O	Brain-specific angiongenesis inhibitor-2	20130512
9606	577	BAI3	-	-	HGNC:945|MIM:602684|Ensembl:ENSG00000135298|HPRD:04064|Vega:OTTHUMG00000014982	6	6q12	brain-specific angiogenesis inhibitor 3	protein-coding	BAI3	brain-specific angiogenesis inhibitor 3	O	dJ91B17.1 (brain-specific angiogenesis inhibitor 3)	20130226
9606	578	BAK1	-	BAK|BAK-LIKE|BCL2L7|CDN1	HGNC:949|MIM:600516|Ensembl:ENSG00000030110|HPRD:02744|Vega:OTTHUMG00000014530	6	6p21.3	BCL2-antagonist/killer 1	protein-coding	BAK1	BCL2-antagonist/killer 1	O	BCL2-like 7 protein|apoptosis regulator BAK|bcl-2 homologous antagonist/killer|bcl-2-like protein 7|bcl2-L-7|pro-apoptotic protein BAK	20130505
9606	579	NKX3-2	-	BAPX1|NKX3.2|NKX3B|SMMD	HGNC:951|MIM:602183|Ensembl:ENSG00000109705|HPRD:09075|Vega:OTTHUMG00000090657	4	4p16.3	NK3 homeobox 2	protein-coding	NKX3-2	NK3 homeobox 2	O	bagpipe homeobox protein homolog 1|homeobox protein NK-3 homolog B|homeobox protein Nkx-3.2	20130505
9606	580	BARD1	-	-	HGNC:952|MIM:601593|HPRD:03354	2	2q34-q35	BRCA1 associated RING domain 1	protein-coding	BARD1	BRCA1 associated RING domain 1	O	BARD-1|BRCA1 associated RING domain 1 isoform alfa|BRCA1 associated RING domain 1 isoform beta|BRCA1 associated RING domain 1 isoform delta|BRCA1 associated RING domain 1 isoform epsilon|BRCA1 associated RING domain 1 isoform eta|BRCA1 associated RING domain 1 isoform gamma|BRCA1 associated RING domain 1 isoform phi|BRCA1-associated RING domain gene 1|BRCA1-associated RING domain protein 1	20130505
9606	581	BAX	-	BCL2L4	HGNC:959|MIM:600040|Ensembl:ENSG00000087088|HPRD:02498|Vega:OTTHUMG00000160476	19	19q13.3-q13.4	BCL2-associated X protein	protein-coding	BAX	BCL2-associated X protein	O	BCL2-associated X protein omega|BCL2-associated X protein transcript variant delta2|apoptosis regulator BAX|bcl-2-like protein 4|bcl2-L-4	20130512
9606	582	BBS1	-	BBS2L2	HGNC:966|MIM:209901|Ensembl:ENSG00000174483|Ensembl:ENSG00000256349|HPRD:01950|Vega:OTTHUMG00000167110|Vega:OTTHUMG00000167719	11	11q13	Bardet-Biedl syndrome 1	protein-coding	BBS1	Bardet-Biedl syndrome 1	O	BBS2-like protein 2|Bardet-Biedl syndrome 1 protein	20130505
9606	583	BBS2	-	BBS	HGNC:967|MIM:606151|Ensembl:ENSG00000125124|HPRD:05855|Vega:OTTHUMG00000176943	16	16q21	Bardet-Biedl syndrome 2	protein-coding	BBS2	Bardet-Biedl syndrome 2	O	Bardet-Biedl syndrome 2 protein	20130505
9606	585	BBS4	-	-	HGNC:969|MIM:600374|Ensembl:ENSG00000140463|HPRD:08982|Vega:OTTHUMG00000133510	15	15q22.3-q23	Bardet-Biedl syndrome 4	protein-coding	BBS4	Bardet-Biedl syndrome 4	O	Bardet-Biedl syndrome 4 protein	20130505
9606	586	BCAT1	-	BCATC|BCT1|ECA39|MECA39|PNAS121|PP18	HGNC:976|MIM:113520|Ensembl:ENSG00000060982|HPRD:00216|Vega:OTTHUMG00000169053	12	12p12.1	branched chain amino-acid transaminase 1, cytosolic	protein-coding	BCAT1	branched chain amino-acid transaminase 1, cytosolic	O	branched chain aminotransferase 1, cytosolic|branched-chain-amino-acid aminotransferase, cytosolic|placental protein 18	20130505
9606	587	BCAT2	-	BCAM|BCATM|BCT2|PP18	HGNC:977|MIM:113530|Ensembl:ENSG00000105552|HPRD:00217|Vega:OTTHUMG00000183327	19	19q13	branched chain amino-acid transaminase 2, mitochondrial	protein-coding	BCAT2	branched chain amino-acid transaminase 2, mitochondrial	O	branched chain aminotransferase 2, mitochondrial|branched-chain-amino-acid aminotransferase, mitochondrial|placental protein 18	20130505
9606	590	BCHE	-	CHE1|E1	HGNC:983|MIM:177400|Ensembl:ENSG00000114200|HPRD:01519|Vega:OTTHUMG00000158131	3	3q26.1-q26.2	butyrylcholinesterase	protein-coding	BCHE	butyrylcholinesterase	O	acylcholine acylhydrolase|butyrylcholine esterase|choline esterase II|cholinesterase|cholinesterase 1|pseudocholinesterase	20130505
9606	593	BCKDHA	-	BCKDE1A|MSU|MSUD1|OVD1A	HGNC:986|MIM:608348|Ensembl:ENSG00000248098|HPRD:02009|Vega:OTTHUMG00000168128	19	19q13.1-q13.2	branched chain keto acid dehydrogenase E1, alpha polypeptide	protein-coding	BCKDHA	branched chain keto acid dehydrogenase E1, alpha polypeptide	O	2-oxoisovalerate dehydrogenase (lipoamide)|2-oxoisovalerate dehydrogenase subunit alpha, mitochondrial|BCKDH E1-alpha|branched-chain alpha-keto acid dehydrogenase E1 component alpha chain	20130505
9606	594	BCKDHB	RP1-279A18.1	E1B|dJ279A18.1	HGNC:987|MIM:248611|Ensembl:ENSG00000083123|HPRD:02011|Vega:OTTHUMG00000016430	6	6q14.1	branched chain keto acid dehydrogenase E1, beta polypeptide	protein-coding	BCKDHB	branched chain keto acid dehydrogenase E1, beta polypeptide	O	2-oxoisovalerate dehydrogenase beta subunit|2-oxoisovalerate dehydrogenase subunit beta, mitochondrial|BCKDE1B|BCKDH E1-beta|E1b-beta subunit of the branched-chain complex|branched chain alpha-ketoacid dehydrogenase E1-beta subunit|branched-chain alpha-keto acid dehydrogenase E1 component beta chain	20130505
9606	595	CCND1	-	BCL1|D11S287E|PRAD1|U21B31	HGNC:1582|MIM:168461|Ensembl:ENSG00000110092|HPRD:01346|Vega:OTTHUMG00000167877	11	11q13	cyclin D1	protein-coding	CCND1	cyclin D1	O	B-cell CLL/lymphoma 1|B-cell lymphoma 1 protein|BCL-1 oncogene|G1/S-specific cyclin-D1|PRAD1 oncogene	20130505
9606	596	BCL2	-	Bcl-2|PPP1R50	HGNC:990|MIM:151430|Ensembl:ENSG00000171791|HPRD:01045	18	18q21.3	B-cell CLL/lymphoma 2	protein-coding	BCL2	B-cell CLL/lymphoma 2	O	apoptosis regulator Bcl-2|protein phosphatase 1, regulatory subunit 50	20130512
9606	597	BCL2A1	-	ACC-1|ACC-2|BCL2L5|BFL1|GRS|HBPA1	HGNC:991|MIM:601056|Ensembl:ENSG00000140379|HPRD:03034|Vega:OTTHUMG00000144173	15	15q24.3	BCL2-related protein A1	protein-coding	BCL2A1	BCL2-related protein A1	O	bcl-2-like protein 5|bcl-2-related protein A1|bcl2-L-5|hematopoietic BCL2-related protein A1|hemopoietic-specific early response protein|protein BFL-1	20130505
9606	598	BCL2L1	RP5-857M17.3	BCL-XL/S|BCL2L|BCLX|BCLXL|BCLXS|Bcl-X|PPP1R52|bcl-xL|bcl-xS	HGNC:992|MIM:600039|Ensembl:ENSG00000171552|HPRD:02497|Vega:OTTHUMG00000032192	20	20q11.21	BCL2-like 1	protein-coding	BCL2L1	BCL2-like 1	O	apoptosis regulator Bcl-X|bcl-2-like protein 1|protein phosphatase 1, regulatory subunit 52	20130512
9606	599	BCL2L2	-	BCL-W|BCL2-L-2|BCLW|PPP1R51	HGNC:995|MIM:601931|Ensembl:ENSG00000129473|HPRD:03569|Vega:OTTHUMG00000028738	14	14q11.2-q12	BCL2-like 2	protein-coding	BCL2L2	BCL2-like 2	O	apoptosis regulator BCL-W|bcl-2-like protein 2|protein phosphatase 1, regulatory subunit 51	20130505
9606	600	BAK1P1	-	BAK2|BCL2L7P1|Bak-2	HGNC:996	20	20q11.21	BCL2-antagonist/killer 1 pseudogene 1	pseudo	BAK1P1	BCL2-antagonist/killer 1 pseudogene 1	O	-	20130505
9606	601	BAK1P2	-	BAK3|BAK3P|BCL2L7P2	HGNC:997	11	11q24.3	BCL2-antagonist/killer 1 pseudogene 2	pseudo	BAK1P2	BCL2-antagonist/killer 1 pseudogene 2	O	-	20130226
9606	602	BCL3	-	BCL4|D19S37	HGNC:998|MIM:109560|Ensembl:ENSG00000069399|HPRD:00179|Vega:OTTHUMG00000151517	19	19q13.1-q13.2	B-cell CLL/lymphoma 3	protein-coding	BCL3	B-cell CLL/lymphoma 3	O	B-cell leukemia/lymphoma 3|B-cell lymphoma 3 protein|B-cell lymphoma 3-encoded protein|BCL-3|chronic lymphatic leukemia protein|proto-oncogene BCL3	20130505
9606	603	BCL5	-	-	HGNC:1000|MIM:151441	17	17q22	B-cell CLL/lymphoma 5	unknown	BCL5	B-cell CLL/lymphoma 5	O	-	20130226
9606	604	BCL6	-	BCL5|BCL6A|LAZ3|ZBTB27|ZNF51	HGNC:1001|MIM:109565|Ensembl:ENSG00000113916|HPRD:00180|Vega:OTTHUMG00000156441	3	3q27	B-cell CLL/lymphoma 6	protein-coding	BCL6	B-cell CLL/lymphoma 6	O	B-cell lymphoma 5 protein|B-cell lymphoma 6 protein|B-cell lymphoma 6 protein transcript|BCL-5|BCL-6|cys-his2 zinc finger transcription factor|lymphoma-associated zinc finger gene on chromosome 3|protein LAZ-3|zinc finger and BTB domain-containing protein 27|zinc finger protein 51|zinc finger transcription factor BCL6S	20130505
9606	605	BCL7A	-	BCL7	HGNC:1004|MIM:601406|HPRD:03243	12	12q24.13	B-cell CLL/lymphoma 7A	protein-coding	BCL7A	B-cell CLL/lymphoma 7A	O	B-cell CLL/lymphoma 7 protein family member A|B-cell CLL/lymphoma-7	20130512
9606	606	NBEAP1	-	BCL8|BCL8A	HGNC:1007|MIM:601889	15	15q11.2	neurobeachin pseudogene 1	pseudo	NBEAP1	neurobeachin pseudogene 1	O	-	20130226
9606	607	BCL9	-	LGS	HGNC:1008|MIM:602597|Ensembl:ENSG00000116128|HPRD:04000|Vega:OTTHUMG00000014031	1	1q21	B-cell CLL/lymphoma 9	protein-coding	BCL9	B-cell CLL/lymphoma 9	O	B-cell CLL/lymphoma 9 protein|B-cell lymphoma 9 protein|bcl-9|protein legless homolog	20130505
9606	608	TNFRSF17	-	BCM|BCMA|CD269	HGNC:11913|MIM:109545|Ensembl:ENSG00000048462|HPRD:00144|Vega:OTTHUMG00000129826	16	16p13.1	tumor necrosis factor receptor superfamily, member 17	protein-coding	TNFRSF17	tumor necrosis factor receptor superfamily, member 17	O	B cell maturation antigen|B-cell maturation factor|B-cell maturation protein|tumor necrosis factor receptor superfamily member 17	20130505
9606	610	HCN2	-	BCNG-2|BCNG2|HAC-1	HGNC:4846|MIM:602781|Ensembl:ENSG00000099822|HPRD:07213|Vega:OTTHUMG00000180590	19	19p13.3	hyperpolarization activated cyclic nucleotide-gated potassium channel 2	protein-coding	HCN2	hyperpolarization activated cyclic nucleotide-gated potassium channel 2	O	brain cyclic nucleotide gated channel 2|brain cyclic nucleotide-gated channel 2|potassium/sodium hyperpolarization-activated cyclic nucleotide-gated channel 2	20130512
9606	611	OPN1SW	-	BCP|BOP|CBT	HGNC:1012|MIM:613522|Ensembl:ENSG00000128617|HPRD:01836|Vega:OTTHUMG00000158311	7	7q32.1	opsin 1 (cone pigments), short-wave-sensitive	protein-coding	OPN1SW	opsin 1 (cone pigments), short-wave-sensitive	O	blue cone photoreceptor pigment|blue-sensitive opsin|short-wave-sensitive opsin 1	20130512
9606	613	BCR	-	ALL|BCR1|CML|D22S11|D22S662|PHL	HGNC:1014|MIM:151410|Ensembl:ENSG00000186716|HPRD:01044|Vega:OTTHUMG00000150655	22	22q11.23	breakpoint cluster region	protein-coding	BCR	breakpoint cluster region	O	BCR/FGFR1 chimera protein|FGFR1/BCR chimera protein|breakpoint cluster region protein|renal carcinoma antigen NY-REN-26	20130505
9606	616	BCRP4	-	BCR-4|BCR4|BCRL4	HGNC:1017|MIM:113660	22	22q11.22	breakpoint cluster region pseudogene 4	pseudo	BCRP4	breakpoint cluster region pseudogene 4	O	-	20130226
9606	617	BCS1L	-	BCS|BCS1|BJS|FLNMS|GRACILE|Hs.6719|MC3DN1|PTD|h-BCS	HGNC:1020|MIM:603647|Ensembl:ENSG00000074582|HPRD:04708|Vega:OTTHUMG00000133114	2	2q33	BC1 (ubiquinol-cytochrome c reductase) synthesis-like	protein-coding	BCS1L	BC1 (ubiquinol-cytochrome c reductase) synthesis-like	O	BCS1-like protein|h-BCS1|mitochondrial chaperone BCS1|mitochondrial complex III assembly	20130505
9606	618	BCYRN1	-	BC200|BC200a|LINC00004|NCRNA00004	HGNC:1022|MIM:606089	2	2p21	brain cytoplasmic RNA 1	miscRNA	BCYRN1	brain cytoplasmic RNA 1	O	-	20130226
9606	619	BCYRN1P1	-	BC200b	HGNC:1023	X	Xq27.1	brain cytoplasmic RNA 1, pseudogene 1	pseudo	BCYRN1P1	brain cytoplasmic RNA 1, pseudogene 1	O	-	20130226
9606	620	BCYRN1P2	-	BC200g	HGNC:1024	1	1q42	brain cytoplasmic RNA 1, pseudogene 2	pseudo	BCYRN1P2	brain cytoplasmic RNA 1, pseudogene 2	O	-	20130226
9606	622	BDH1	-	BDH|SDR9C1	HGNC:1027|MIM:603063|Ensembl:ENSG00000161267|HPRD:04344|Vega:OTTHUMG00000155478	3	3q29	3-hydroxybutyrate dehydrogenase, type 1	protein-coding	BDH1	3-hydroxybutyrate dehydrogenase, type 1	O	(R)-3-hydroxybutyrate dehydrogenase|3-hydroxybutyrate dehydrogenase (heart, mitochondrial)|D-beta-hydroxybutyrate dehydrogenase, mitochondrial|short chain dehydrogenase/reductase family 9C, member 1	20130505
9606	623	BDKRB1	-	B1BKR|B1R|BKB1R|BKR1|BRADYB1	HGNC:1029|MIM:600337|HPRD:02639	14	14q32.1-q32.2	bradykinin receptor B1	protein-coding	BDKRB1	bradykinin receptor B1	O	B1 bradykinin receptor|BK-1 receptor|bradykinin B1 receptor|bradykinin receptor 1	20130505
9606	624	BDKRB2	-	B2R|BK-2|BK2|BKR2|BRB2	HGNC:1030|MIM:113503|Ensembl:ENSG00000168398|HPRD:00213|Vega:OTTHUMG00000171408	14	14q32.1-q32.2	bradykinin receptor B2	protein-coding	BDKRB2	bradykinin receptor B2	O	B2 bradykinin receptor|BK-2 receptor	20130505
9606	626	BDMR	-	AHO3	HGNC:1032|MIM:600430	2	2q37	brachydactyly-mental retardation syndrome	unknown	BDMR	brachydactyly-mental retardation syndrome	O	-	20130226
9606	627	BDNF	-	ANON2|BULN2	HGNC:1033|MIM:113505|Ensembl:ENSG00000176697|HPRD:00214|Vega:OTTHUMG00000178797	11	11p13	brain-derived neurotrophic factor	protein-coding	BDNF	brain-derived neurotrophic factor	O	abrineurin|neurotrophin	20130512
9606	628	BEVI	-	-	MIM:109180	6	-	baboon M7 virus integration site	unknown	-	-	-	-	20130226
9606	629	CFB	DADB-122G4.5	AHUS4|BF|BFD|CFAB|FB|FBI12|GBG|H2-Bf|PBF2	HGNC:1037|MIM:138470|Ensembl:ENSG00000243649|HPRD:00718|Vega:OTTHUMG00000031198	6	6p21.3	complement factor B	protein-coding	CFB	complement factor B	O	B-factor, properdin|C3 proaccelerator|C3 proactivator|C3/C5 convertase|glycine-rich beta glycoprotein|glycine-rich beta-glycoprotein|properdin factor B	20130505
9606	631	BFSP1	RP4-531H16.2	CP115|CP94|LIFL-H	HGNC:1040|MIM:603307|Ensembl:ENSG00000125864|HPRD:04494|Vega:OTTHUMG00000031940	20	20p12.1	beaded filament structural protein 1, filensin	protein-coding	BFSP1	beaded filament structural protein 1, filensin	O	cytoskeletal protein, 115 KD|filensin|lens fiber cell beaded-filament structural protein CP 115|lens intermediate filament-like heavy	20130505
9606	632	BGLAP	RP11-54H19.5	BGP|OC|OCN	HGNC:1043|MIM:112260|HPRD:00205|Vega:OTTHUMG00000014819	1	1q22	bone gamma-carboxyglutamate (gla) protein	protein-coding	BGLAP	bone gamma-carboxyglutamate (gla) protein	O	bone Gla protein|bone gamma-carboxyglutamate (gla) protein (osteocalcin)|gamma-carboxyglutamic acid-containing protein|osteocalcin	20130505
9606	633	BGN	-	DSPG1|PG-S1|PGI|SLRR1A	HGNC:1044|MIM:301870|Ensembl:ENSG00000182492|HPRD:02359|Vega:OTTHUMG00000024205	X	Xq28	biglycan	protein-coding	BGN	biglycan	O	biglycan proteoglycan|bone/cartilage proteoglycan I|bone/cartilage proteoglycan-I|dermatan sulphate proteoglycan I|small leucine-rich protein 1A	20130505
9606	634	CEACAM1	-	BGP|BGP1|BGPI	HGNC:1814|MIM:109770|Ensembl:ENSG00000079385|HPRD:00191|Vega:OTTHUMG00000151078	19	19q13.2	carcinoembryonic antigen-related cell adhesion molecule 1 (biliary glycoprotein)	protein-coding	CEACAM1	carcinoembryonic antigen-related cell adhesion molecule 1 (biliary glycoprotein)	O	CD66a antigen|antigen CD66|carcinoembryonic antigen-related cell adhesion molecule 1	20130505
9606	635	BHMT	-	BHMT1	HGNC:1047|MIM:602888|Ensembl:ENSG00000145692|HPRD:04200|Vega:OTTHUMG00000108157	5	5q14.1	betaine--homocysteine S-methyltransferase	protein-coding	BHMT	betaine--homocysteine S-methyltransferase	O	betaine--homocysteine S-methyltransferase 1	20130505
9606	636	BICD1	-	BICD	HGNC:1049|MIM:602204|Ensembl:ENSG00000151746|HPRD:03730|Vega:OTTHUMG00000169307	12	12p11.2-p11.1	bicaudal D homolog 1 (Drosophila)	protein-coding	BICD1	bicaudal D homolog 1 (Drosophila)	O	bic-D 1|cytoskeleton-like bicaudal D protein homolog 1|protein bicaudal D homolog 1	20130505
9606	637	BID	-	FP497	HGNC:1050|MIM:601997|Ensembl:ENSG00000015475|HPRD:03590|Vega:OTTHUMG00000150087	22	22q11.1	BH3 interacting domain death agonist	protein-coding	BID	BH3 interacting domain death agonist	O	BH3-interacting domain death agonist|BID isoform ES(1b)|BID isoform L(2)|BID isoform Si6|Human BID coding sequence|apoptic death agonist|desmocollin type 4|p22 BID	20130505
9606	638	BIK	-	BIP1|BP4|NBK	HGNC:1051|MIM:603392|Ensembl:ENSG00000100290|HPRD:04547|Vega:OTTHUMG00000150703	22	22q13.31	BCL2-interacting killer (apoptosis-inducing)	protein-coding	BIK	BCL2-interacting killer (apoptosis-inducing)	O	apoptosis inducer NBK|apoptosis-inducing NBK|bcl-2-interacting killer	20130505
9606	639	PRDM1	RP1-134E15.1	BLIMP1|PRDI-BF1	HGNC:9346|MIM:603423|Ensembl:ENSG00000057657|HPRD:04572|Vega:OTTHUMG00000015299	6	6q21	PR domain containing 1, with ZNF domain	protein-coding	PRDM1	PR domain containing 1, with ZNF domain	O	B-lymphocyte-induced maturation protein 1|BLIMP-1|PR domain zinc finger protein 1|PRDI-binding factor-1|beta-interferon gene positive-regulatory domain I binding factor	20130505
9606	640	BLK	-	MODY11	HGNC:1057|MIM:191305|Ensembl:ENSG00000136573|HPRD:01866|Vega:OTTHUMG00000090729	8	8p23-p22	B lymphoid tyrosine kinase	protein-coding	BLK	B lymphoid tyrosine kinase	O	BLK nonreceptor tyrosine kinase|b lymphocyte kinase|p55-Blk|tyrosine-protein kinase Blk	20130505
9606	641	BLM	-	BS|RECQ2|RECQL2|RECQL3	HGNC:1058|MIM:604610|Ensembl:ENSG00000197299|HPRD:05211|Vega:OTTHUMG00000149834	15	15q26.1	Bloom syndrome, RecQ helicase-like	protein-coding	BLM	Bloom syndrome, RecQ helicase-like	O	Bloom syndrome protein|DNA helicase, RecQ-like type 2|recQ protein-like 3	20130505
9606	642	BLMH	-	BH|BMH	HGNC:1059|MIM:602403|Ensembl:ENSG00000108578|HPRD:03870|Vega:OTTHUMG00000179756	17	17q11.2	bleomycin hydrolase	protein-coding	BLMH	bleomycin hydrolase	O	BLM hydrolase	20130505
9606	643	CXCR5	-	BLR1|CD185|MDR15	HGNC:1060|MIM:601613|HPRD:03367	11	11q23.3	chemokine (C-X-C motif) receptor 5	protein-coding	CXCR5	chemokine (C-X-C motif) receptor 5	O	Burkitt lymphoma receptor 1, GTP binding protein (chemokine (C-X-C motif) receptor 5)|Burkitt lymphoma receptor 1, GTP-binding protein|C-X-C chemokine receptor type 5|CXC-R5|CXCR-5|MDR-15|monocyte-derived receptor 15	20130504
9606	644	BLVRA	-	BLVR|BVR|BVRA	HGNC:1062|MIM:109750|Ensembl:ENSG00000106605|HPRD:11229|Vega:OTTHUMG00000128953	7	7p13	biliverdin reductase A	protein-coding	BLVRA	biliverdin reductase A	O	BVR A|biliverdin-IX alpha-reductase	20130505
9606	645	BLVRB	-	BVRB|FLR|SDR43U1	HGNC:1063|MIM:600941|Ensembl:ENSG00000090013|HPRD:02967|Vega:OTTHUMG00000182593	19	19q13.1-q13.2	biliverdin reductase B (flavin reductase (NADPH))	protein-coding	BLVRB	biliverdin reductase B (flavin reductase (NADPH))	O	BVR-B|FR|GHBP|NADPH-dependent diaphorase|NADPH-flavin reductase|biliverdin-IX beta-reductase|flavin reductase (NADPH)|green heme-binding protein|short chain dehydrogenase/reductase family 43U, member 1	20130505
9606	646	BNC1	-	BNC|BSN1|HsT19447	HGNC:1081|MIM:601930|Ensembl:ENSG00000169594|HPRD:11799|Vega:OTTHUMG00000147362	15	15q25.2	basonuclin 1	protein-coding	BNC1	basonuclin 1	O	zinc finger protein basonuclin|zinc finger protein basonuclin-1	20130505
9606	648	BMI1	RP11-573G6.1	FLVI2/BMI1|PCGF4|RNF51	HGNC:1066|MIM:164831|Ensembl:ENSG00000168283|HPRD:01277|Vega:OTTHUMG00000017807	10	10p11.23	BMI1 polycomb ring finger oncogene	protein-coding	BMI1	BMI1 polycomb ring finger oncogene	O	B lymphoma Mo-MLV insertion region 1 homolog|flvi-2/bmi-1|murine leukemia viral (bmi-1) oncogene homolog|polycomb complex protein BMI-1|polycomb group RING finger protein 4|polycomb group protein Bmi1|ring finger protein 51	20130512
9606	649	BMP1	-	OI13|PCOLC|PCP|PCP2|TLD	HGNC:1067|MIM:112264|Ensembl:ENSG00000168487|HPRD:00209|Vega:OTTHUMG00000097761	8	8p21.3	bone morphogenetic protein 1	protein-coding	BMP1	bone morphogenetic protein 1	O	mammalian tolloid protein|procollagen C-endopeptidase|procollagen C-proteinase	20130505
9606	650	BMP2	-	BDA2|BMP2A	HGNC:1069|MIM:112261|Ensembl:ENSG00000125845|HPRD:00206|Vega:OTTHUMG00000031833	20	20p12	bone morphogenetic protein 2	protein-coding	BMP2	bone morphogenetic protein 2	O	BMP-2A|bone morphogenetic protein 2A	20130505
9606	651	BMP3	-	BMP-3A	HGNC:1070|MIM:112263|Ensembl:ENSG00000152785|HPRD:00208|Vega:OTTHUMG00000130292	4	4q21	bone morphogenetic protein 3	protein-coding	BMP3	bone morphogenetic protein 3	O	BMP-3|bone morphogenetic protein 3 (osteogenic)|bone morphogenetic protein 3A|bone morphogenetic protein-3|osteogenin	20130226
9606	652	BMP4	-	BMP2B|BMP2B1|MCOPS6|OFC11|ZYME	HGNC:1071|MIM:112262|Ensembl:ENSG00000125378|HPRD:00207|Vega:OTTHUMG00000140303	14	14q22-q23	bone morphogenetic protein 4	protein-coding	BMP4	bone morphogenetic protein 4	O	BMP-2B|BMP-4|bone morphogenetic protein 2B	20130505
9606	653	BMP5	-	-	HGNC:1072|MIM:112265|HPRD:00210	6	6p12.1	bone morphogenetic protein 5	protein-coding	BMP5	bone morphogenetic protein 5	O	BMP-5|bone morphogenenic protein-5	20130508
9606	654	BMP6	-	VGR|VGR1	HGNC:1073|MIM:112266|Ensembl:ENSG00000153162|HPRD:00211|Vega:OTTHUMG00000014217	6	6p24-p23	bone morphogenetic protein 6	protein-coding	BMP6	bone morphogenetic protein 6	O	BMP-6|VG-1-R|VG-1-related protein|VGR-1|Vg1-related sequence|vegetal related growth factor (TGFB-related)|vegetal-related (TGFB related) cytokine	20130505
9606	655	BMP7	RP11-560A15.5	OP-1	HGNC:1074|MIM:112267|Ensembl:ENSG00000101144|HPRD:00212|Vega:OTTHUMG00000032812	20	20q13	bone morphogenetic protein 7	protein-coding	BMP7	bone morphogenetic protein 7	O	osteogenic protein 1	20130512
9606	656	BMP8B	-	BMP8|OP2	HGNC:1075|MIM:602284|HPRD:03792	1	1p35-p32	bone morphogenetic protein 8b	protein-coding	BMP8B	bone morphogenetic protein 8b	O	BMP-8|BMP-8B|bone morphogenetic protein 8 (osteogenic protein 2)|bone morphogenetic protein 8B|dJ118J21.1 (bone morphogenetic protein 8 (osteogenic protein 2))|osteogenic protein 2	20130505
9606	657	BMPR1A	-	10q23del|ACVRLK3|ALK3|CD292|SKR5	HGNC:1076|MIM:601299|Ensembl:ENSG00000107779|HPRD:03192|Vega:OTTHUMG00000018657	10	10q22.3	bone morphogenetic protein receptor, type IA	protein-coding	BMPR1A	bone morphogenetic protein receptor, type IA	O	ALK-3|BMP type-1A receptor|BMPR-1A|activin A receptor, type II-like kinase 3|activin receptor-like kinase 3|bone morphogenetic protein receptor type-1A|serine/threonine-protein kinase receptor R5	20130505
9606	658	BMPR1B	-	ALK-6|ALK6|CDw293	HGNC:1077|MIM:603248|Ensembl:ENSG00000138696|HPRD:04457|Vega:OTTHUMG00000130991	4	4q22-q24	bone morphogenetic protein receptor, type IB	protein-coding	BMPR1B	bone morphogenetic protein receptor, type IB	O	BMP type-1B receptor|BMPR-1B|activin receptor-like kinase 6|bone morphogenetic protein receptor type-1B|serine/threonine receptor kinase	20130505
9606	659	BMPR2	-	BMPR-II|BMPR3|BMR2|BRK-3|PPH1|T-ALK	HGNC:1078|MIM:600799|Ensembl:ENSG00000204217|HPRD:02880|Vega:OTTHUMG00000133617	2	2q33-q34	bone morphogenetic protein receptor, type II (serine/threonine kinase)	protein-coding	BMPR2	bone morphogenetic protein receptor, type II (serine/threonine kinase)	O	BMP type II receptor|BMP type-2 receptor|BMPR-2|bone morphogenetic protein receptor type II|bone morphogenetic protein receptor type-2|type II activin receptor-like kinase|type II receptor for bone morphogenetic protein-4	20130505
9606	660	BMX	-	ETK|PSCTK2|PSCTK3	HGNC:1079|MIM:300101|Ensembl:ENSG00000102010|HPRD:02111|Vega:OTTHUMG00000021180	X	Xp22.2	BMX non-receptor tyrosine kinase	protein-coding	BMX	BMX non-receptor tyrosine kinase	O	Etk/Bmx cytosolic tyrosine kinase|NTK38 tyrosine kinase|bone marrow tyrosine kinase gene in chromosome X protein|cytoplasmic tyrosine-protein kinase BMX|epithelial and endothelial tyrosine kinase	20130505
9606	661	POLR3D	-	BN51T|RPC4|RPC53|TSBN51	HGNC:1080|MIM:187280|Ensembl:ENSG00000168495|HPRD:01755|Vega:OTTHUMG00000163778	8	8q21	polymerase (RNA) III (DNA directed) polypeptide D, 44kDa	protein-coding	POLR3D	polymerase (RNA) III (DNA directed) polypeptide D, 44kDa	O	BN51 (BHK21) temperature sensitivity complementing|DNA-directed RNA polymerase III 47 kDa polypeptide|DNA-directed RNA polymerase III subunit D|DNA-directed RNA polymerase III subunit RPC4|RNA polymerase III 47 kDa subunit|RNA polymerase III subunit C4|RPC53 homolog|temperature sensitive complementation, cell cycle specific, tsBN51	20130505
9606	662	BNIP1	TRG8	NIP1|SEC20|TRG-8	HGNC:1082|MIM:603291|Ensembl:ENSG00000113734|HPRD:04480|Vega:OTTHUMG00000130521	5	5q33-q34	BCL2/adenovirus E1B 19kDa interacting protein 1	protein-coding	BNIP1	BCL2/adenovirus E1B 19kDa interacting protein 1	O	BCL2/adenovirus E1B 19 kDa protein-interacting protein 1|transformation-related gene 8 protein|vesicle transport protein SEC20	20130505
9606	663	BNIP2	-	BNIP-2|NIP2	HGNC:1083|MIM:603292|HPRD:04481	15	15q22.2	BCL2/adenovirus E1B 19kDa interacting protein 2	protein-coding	BNIP2	BCL2/adenovirus E1B 19kDa interacting protein 2	O	BCL2/adenovirus E1B 19 kDa protein-interacting protein 2	20130505
9606	664	BNIP3	-	NIP3	HGNC:1084|MIM:603293|HPRD:04482	10	10q26.3	BCL2/adenovirus E1B 19kDa interacting protein 3	protein-coding	BNIP3	BCL2/adenovirus E1B 19kDa interacting protein 3	O	BCL2/adenovirus E1B 19 kDa protein-interacting protein 3	20130505
9606	665	BNIP3L	-	BNIP3a|NIX	HGNC:1085|MIM:605368|Ensembl:ENSG00000104765|HPRD:07288|Vega:OTTHUMG00000099433	8	8p21	BCL2/adenovirus E1B 19kDa interacting protein 3-like	protein-coding	BNIP3L	BCL2/adenovirus E1B 19kDa interacting protein 3-like	O	BCL2/adenovirus E1B 19 kDa protein-interacting protein 3-like|BCL2/adenovirus E1B 19 kDa protein-interacting protein 3A|BCL2/adenovirus E1B 19-kd protein-interacting protein 3a|NIP3-like protein X|NIP3L|adenovirus E1B19k-binding protein B5	20130505
9606	666	BOK	-	BCL2L9|BOKL	HGNC:1087|MIM:605404|Ensembl:ENSG00000176720|HPRD:05657|Vega:OTTHUMG00000133411	2	2q37.3	BCL2-related ovarian killer	protein-coding	BOK	BCL2-related ovarian killer	O	bcl-2-like protein 9|bcl-2-related ovarian killer protein|bcl2-L-9|hBOK	20130505
9606	667	DST	RP3-361I14.2	BP240|BPA|BPAG1|CATX-15|CATX15|D6S1101|DMH|DT|HSAN6|MACF2	HGNC:1090|MIM:113810|Ensembl:ENSG00000151914|HPRD:00222|Vega:OTTHUMG00000014913	6	6p12.1	dystonin	protein-coding	DST	dystonin	O	bullous pemphigoid antigen 1|bullous pemphigoid antigen 1, 230/240kDa|dystonia musculorum protein|hemidesmosomal plaque protein|trabeculin-beta	20130505
9606	668	FOXL2	-	BPES|BPES1|PFRK|PINTO|POF3	HGNC:1092|MIM:605597|Ensembl:ENSG00000183770|HPRD:05723|Vega:OTTHUMG00000159889	3	3q23	forkhead box L2	protein-coding	FOXL2	forkhead box L2	O	forkhead box protein L2|forkhead transcription factor FOXL2	20130505
9606	669	BPGM	-	DPGM	HGNC:1093|MIM:613896|Ensembl:ENSG00000172331|HPRD:01961|Vega:OTTHUMG00000155380	7	7q33	2,3-bisphosphoglycerate mutase	protein-coding	BPGM	2,3-bisphosphoglycerate mutase	O	2,3-bisphosphoglycerate mutase, erythrocyte|2,3-bisphosphoglycerate synthase|2,3-diphosphoglycerate mutase|BPG-dependent PGAM|bisphosphoglycerate mutase|erythrocyte 2,3-bisphosphoglycerate mutase	20130505
9606	670	BPHL	-	BPH-RP|MCNAA|VACVASE	HGNC:1094|MIM:603156|Ensembl:ENSG00000137274|HPRD:04403|Vega:OTTHUMG00000014140	6	6p25	biphenyl hydrolase-like (serine hydrolase)	protein-coding	BPHL	biphenyl hydrolase-like (serine hydrolase)	O	biphenyl hydrolase-related protein|breast epithelial mucin-associated antigen|valacyclovir hydrolase|valacyclovirase	20130512
9606	671	BPI	RP13-218F6_A.1	BPIFD1|rBPI	HGNC:1095|MIM:109195|Ensembl:ENSG00000101425|HPRD:00174|Vega:OTTHUMG00000032441	20	20q11.23	bactericidal/permeability-increasing protein	protein-coding	BPI	bactericidal/permeability-increasing protein	O	BPI fold containing family D, member 1|CAP 57|bactericidal permeability-increasing protein|recombinant BPI holoprotein, rBPI	20130426
9606	672	BRCA1	-	BRCAI|BRCC1|BROVCA1|IRIS|PNCA4|PPP1R53|PSCP|RNF53	HGNC:1100|MIM:113705|Ensembl:ENSG00000012048|HPRD:00218|Vega:OTTHUMG00000157426	17	17q21	breast cancer 1, early onset	protein-coding	BRCA1	breast cancer 1, early onset	O	BRCA1/BRCA2-containing complex, subunit 1|RING finger protein 53|breast and ovarian cancer susceptibility protein 1|breast and ovarian cancer sususceptibility protein 1|breast cancer type 1 susceptibility protein|protein phosphatase 1, regulatory subunit 53	20130512
9606	673	BRAF	-	B-RAF1|BRAF1|NS7|RAFB1	HGNC:1097|MIM:164757|Ensembl:ENSG00000157764|HPRD:01264|Vega:OTTHUMG00000157457	7	7q34	v-raf murine sarcoma viral oncogene homolog B1	protein-coding	BRAF	v-raf murine sarcoma viral oncogene homolog B1	O	94 kDa B-raf protein|B-Raf proto-oncogene serine/threonine-protein kinase (p94)|murine sarcoma viral (v-raf) oncogene homolog B1|p94|proto-oncogene B-Raf|serine/threonine-protein kinase B-raf	20130512
9606	675	BRCA2	RP11-298P3.4	BRCC2|BROVCA2|FACD|FAD|FAD1|FANCB|FANCD|FANCD1|GLM3|PNCA2	HGNC:1101|MIM:600185|Ensembl:ENSG00000139618|HPRD:02554|Vega:OTTHUMG00000017411	13	13q12.3	breast cancer 2, early onset	protein-coding	BRCA2	breast cancer 2, early onset	O	BRCA1/BRCA2-containing complex, subunit 2|breast and ovarian cancer susceptibility gene, early onset|breast cancer 2 tumor suppressor|breast cancer type 2 susceptibility protein|fanconi anemia group D1 protein|truncated breast and ovarian cancer susceptibility protein 2	20130512
9606	676	BRDT	-	BRD6|CT9	HGNC:1105|MIM:602144|Ensembl:ENSG00000137948|HPRD:03684|Vega:OTTHUMG00000010113	1	1p22.1	bromodomain, testis-specific	protein-coding	BRDT	bromodomain, testis-specific	O	RING3-like protein|bromodomain testis-specific protein|cancer/testis antigen 9	20130505
9606	677	ZFP36L1	-	BRF1|Berg36|ERF-1|ERF1|RNF162B|TIS11B|cMG1	HGNC:1107|MIM:601064|Ensembl:ENSG00000185650|HPRD:03041|Vega:OTTHUMG00000171385	14	14q22-q24	ZFP36 ring finger protein-like 1	protein-coding	ZFP36L1	ZFP36 ring finger protein-like 1	O	EGF-response factor 1|butyrate response factor 1|early response factor Berg36|zinc finger protein 36, C3H type-like 1|zinc finger protein 36, C3H1 type-like 1|zinc finger protein, C3H type, 36-like 1	20130505
9606	678	ZFP36L2	-	BRF2|ERF-2|ERF2|RNF162C|TIS11D	HGNC:1108|MIM:612053|Ensembl:ENSG00000152518|HPRD:18319|Vega:OTTHUMG00000128642	2	2p22.3-p21	ZFP36 ring finger protein-like 2	protein-coding	ZFP36L2	ZFP36 ring finger protein-like 2	O	EGF-response factor 2|ZFP36-like 2|butyrate response factor 2|zinc finger protein 36, C3H type-like 1|zinc finger protein 36, C3H type-like 2|zinc finger protein 36, C3H1 type-like 2|zinc finger protein, C3H type, 36-like 2	20130505
9606	680	BRS3	RP1-196E23.3	-	HGNC:1113|MIM:300107|HPRD:02116	X	Xq26.3	bombesin-like receptor 3	protein-coding	BRS3	bombesin-like receptor 3	O	BRS-3|G-protein coupled receptor|bombesin receptor subtype 3|bombesin receptor subtype-3	20130226
9606	682	BSG	UNQ6505/PRO21383	5F7|CD147|EMMPRIN|M6|OK|TCSF	HGNC:1116|MIM:109480|Ensembl:ENSG00000172270|HPRD:00176|Vega:OTTHUMG00000177718	19	19p13.3	basigin (Ok blood group)	protein-coding	BSG	basigin (Ok blood group)	O	CD147 antigen|OK blood group antigen|basigin|collagenase stimulatory factor|extracellular matrix metalloproteinase inducer|leukocyte activation antigen M6|tumor cell-derived collagenase stimulatory factor	20130505
9606	683	BST1	-	CD157	HGNC:1118|MIM:600387|Ensembl:ENSG00000109743|HPRD:02665|Vega:OTTHUMG00000097739	4	4p15	bone marrow stromal cell antigen 1	protein-coding	BST1	bone marrow stromal cell antigen 1	O	ADP-ribosyl cyclase 2|BST-1|NAD(+) nucleosidase|bone marrow stromal antigen 1|cADPr hydrolase 2|cyclic ADP-ribose hydrolase 2	20130505
9606	684	BST2	-	CD317|TETHERIN	HGNC:1119|MIM:600534|Ensembl:ENSG00000130303|HPRD:02759|Vega:OTTHUMG00000165993	19	19p13.1	bone marrow stromal cell antigen 2	protein-coding	BST2	bone marrow stromal cell antigen 2	O	BST-2|HM1.24 antigen|NPC-A-7|bone marrow stromal antigen 2	20130512
9606	685	BTC	-	-	HGNC:1121|MIM:600345|HPRD:02643	4	4q13.3	betacellulin	protein-coding	BTC	betacellulin	O	probetacellulin	20130504
9606	686	BTD	-	-	HGNC:1122|MIM:609019|Ensembl:ENSG00000169814|HPRD:08359|Vega:OTTHUMG00000129861	3	3p25	biotinidase	protein-coding	BTD	biotinidase	O	biotinase	20130505
9606	687	KLF9	-	BTEB|BTEB1	HGNC:1123|MIM:602902|Ensembl:ENSG00000119138|HPRD:04211|Vega:OTTHUMG00000019991	9	9q13	Kruppel-like factor 9	protein-coding	KLF9	Kruppel-like factor 9	O	BTE-binding protein 1|GC-box-binding protein 1|Krueppel-like factor 9|basic transcription element binding protein 1|basic transcription element-binding protein 1|transcription factor BTEB1	20130505
9606	688	KLF5	RP11-505F3.5	BTEB2|CKLF|IKLF	HGNC:6349|MIM:602903|Ensembl:ENSG00000102554|HPRD:04212|Vega:OTTHUMG00000017074	13	13q22.1	Kruppel-like factor 5 (intestinal)	protein-coding	KLF5	Kruppel-like factor 5 (intestinal)	O	BTE-binding protein 2|GC box binding protein 2|GC-box-binding protein 2|Krueppel-like factor 5|basic transcription element binding protein 2|basic transcription element-binding protein 2|colon krueppel-like factor|colon kruppel-like factor|intestinal-enriched krueppel-like factor|intestinal-enriched kruppel-like factor|transcription factor BTEB2	20130505
9606	689	BTF3	OK/SW-cl.8	BETA-NAC|BTF3a|BTF3b|NACB	HGNC:1125|MIM:602542|Ensembl:ENSG00000145741|HPRD:03966|Vega:OTTHUMG00000102031	5	5q13.2	basic transcription factor 3	protein-coding	BTF3	basic transcription factor 3	O	RNA polymerase B transcription factor 3|nascent-polypeptide-associated complex beta polypeptide|transcription factor BTF3	20130505
9606	690	BTF3P11	-	BTF3L1|HUMBTFB|OCIF|OPG|TNFRSF11B	HGNC:1126|MIM:602543	13	13q22	basic transcription factor 3 pseudogene 11	pseudo	BTF3P11	basic transcription factor 3 pseudogene 11	O	-	20130226
9606	693	BTF3P1	-	HUMBTFA	HGNC:1129	8	8q11.23	basic transcription factor 3, pseudogene 1	pseudo	BTF3P1	basic transcription factor 3, pseudogene 1	O	-	20130226
9606	694	BTG1	-	-	HGNC:1130|MIM:109580|HPRD:15912	12	12q22	B-cell translocation gene 1, anti-proliferative	protein-coding	BTG1	B-cell translocation gene 1, anti-proliferative	O	B-cell translocation gene 1 protein|protein BTG1	20130505
9606	695	BTK	RP1-164F3.2	AGMX1|AT|ATK|BPK|IMD1|PSCTK1|XLA	HGNC:1133|MIM:300300|Ensembl:ENSG00000010671|HPRD:02248|Vega:OTTHUMG00000022022	X	Xq21.33-q22	Bruton agammaglobulinemia tyrosine kinase	protein-coding	BTK	Bruton agammaglobulinemia tyrosine kinase	O	B-cell progenitor kinase|agammaglobulinaemia tyrosine kinase|dominant-negative kinase-deficient Brutons tyrosine kinase|tyrosine-protein kinase BTK|tyrosine-protein kinase BTK isoform (lacking exon 14)	20130505
9606	696	BTN1A1	-	BT|BTN	HGNC:1135|MIM:601610|Ensembl:ENSG00000124557|HPRD:03365|Vega:OTTHUMG00000016358	6	6p22.1	butyrophilin, subfamily 1, member A1	protein-coding	BTN1A1	butyrophilin, subfamily 1, member A1	O	bK14H9.2 (butyrophilin, subfamily 1, member A1)|butyrophilin subfamily 1 member A1	20130505
9606	698	BTS1	-	-	HGNC:1147	10	10p11.23	bladder tumor susceptibility 1	unknown	BTS1	bladder tumor susceptibility 1	O	-	20130226
9606	699	BUB1	-	BUB1A|BUB1L|hBUB1	HGNC:1148|MIM:602452|Ensembl:ENSG00000169679|HPRD:03907|Vega:OTTHUMG00000153638	2	2q14	BUB1 mitotic checkpoint serine/threonine kinase	protein-coding	BUB1	BUB1 mitotic checkpoint serine/threonine kinase	O	BUB1 budding uninhibited by benzimidazoles 1 homolog|budding uninhibited by benzimidazoles 1 homolog|mitotic checkpoint serine/threonine-protein kinase BUB1|mitotic spindle checkpoint kinase|putative serine/threonine-protein kinase	20130505
9606	700	BVR1	-	-	HGNC:1153	8	8q24	Burkitt lymphoma variant rearranging region 1	other	BVR1	Burkitt lymphoma variant rearranging region 1	O	-	20130226
9606	701	BUB1B	-	BUB1beta|BUBR1|Bub1A|MAD3L|MVA1|SSK1|hBUBR1	HGNC:1149|MIM:602860|Ensembl:ENSG00000156970|HPRD:04176|Vega:OTTHUMG00000129877	15	15q15	BUB1 mitotic checkpoint serine/threonine kinase B	protein-coding	BUB1B	BUB1 mitotic checkpoint serine/threonine kinase B	O	MAD3/BUB1-related protein kinase|budding uninhibited by benzimidazoles 1 homolog beta|mitotic checkpoint kinase MAD3L|mitotic checkpoint serine/threonine-protein kinase BUB1 beta	20130505
9606	705	BYSL	RP5-973N23.2	BYSTIN	HGNC:1157|MIM:603871|Ensembl:ENSG00000112578|HPRD:04848|Vega:OTTHUMG00000014687	6	6p21.1	bystin-like	protein-coding	BYSL	bystin-like	O	by the ribosomal protein s6 gene, drosophila, homolog-like|bystin	20130505
9606	706	TSPO	RP3-526I14.4	BPBS|BZRP|DBI|IBP|MBR|PBR|PBS|PKBS|PTBR|mDRC|pk18	HGNC:1158|MIM:109610|Ensembl:ENSG00000100300|HPRD:15913|Vega:OTTHUMG00000150573	22	22q13.31	translocator protein (18kDa)	protein-coding	TSPO	translocator protein (18kDa)	O	benzodiazepine peripheral binding site|mitochondrial benzodiazepine receptor|peripheral-type benzodiazepine receptor|translocator protein	20130512
9606	708	C1QBP	-	GC1QBP|HABP1|SF2p32|gC1Q-R|gC1qR|p32	HGNC:1243|MIM:601269|Ensembl:ENSG00000108561|HPRD:03168|Vega:OTTHUMG00000177875	17	17p13.3	complement component 1, q subcomponent binding protein	protein-coding	C1QBP	complement component 1, q subcomponent binding protein	O	ASF/SF2-associated protein p32|C1q globular domain-binding protein|complement component 1 Q subcomponent-binding protein, mitochondrial|glycoprotein gC1qBP|hyaluronan-binding protein 1|mitochondrial matrix protein p32|p33|splicing factor SF2-associated protein	20130505
9606	709	C1HR	-	-	HGNC:1227	X	-	C1AGOH temperature sensitivity complementing	unknown	C1HR	C1AGOH temperature sensitivity complementing	O	-	20130226
9606	710	SERPING1	-	C1IN|C1INH|C1NH|HAE1|HAE2	HGNC:1228|MIM:606860|Ensembl:ENSG00000149131|HPRD:06033|Vega:OTTHUMG00000150304	11	11q12.1	serpin peptidase inhibitor, clade G (C1 inhibitor), member 1	protein-coding	SERPING1	serpin peptidase inhibitor, clade G (C1 inhibitor), member 1	O	C1 esterase inhibitor|C1-inhibiting factor|complement component 1 inhibitor|plasma protease C1 inhibitor|serine/cysteine proteinase inhibitor clade G member 1|serpin G1	20130505
9606	711	ERC2-IT1	-	C1orf1|C3orf51|Po42	HGNC:1229|HPRD:04924	3	3p14.3	ERC2 intronic transcript 1 (non-protein coding)	miscRNA	ERC2-IT1	ERC2 intronic transcript 1 (non-protein coding)	O	-	20130226
9606	712	C1QA	-	-	HGNC:1241|MIM:120550|Ensembl:ENSG00000173372|HPRD:00393|Vega:OTTHUMG00000002893	1	1p36.12	complement component 1, q subcomponent, A chain	protein-coding	C1QA	complement component 1, q subcomponent, A chain	O	complement C1q subcomponent subunit A|complement component 1, q subcomponent, alpha polypeptide|complement component C1q, A chain	20130512
9606	713	C1QB	RP4-815O16.3	-	HGNC:1242|MIM:120570|Ensembl:ENSG00000173369|HPRD:00394|Vega:OTTHUMG00000002896	1	1p36.12	complement component 1, q subcomponent, B chain	protein-coding	C1QB	complement component 1, q subcomponent, B chain	O	complement C1q subcomponent subunit B|complement component 1, q subcomponent, beta polypeptide|complement component C1q, B chain|complement subcomponent C1q chain B	20130512
9606	714	C1QC	-	C1Q-C|C1QG	HGNC:1245|MIM:120575|Ensembl:ENSG00000159189|HPRD:00395|Vega:OTTHUMG00000002891	1	1p36.11	complement component 1, q subcomponent, C chain	protein-coding	C1QC	complement component 1, q subcomponent, C chain	O	complement C1q subcomponent subunit C|complement component 1, q subcomponent, gamma polypeptide	20130505
9606	715	C1R	-	-	HGNC:1246|MIM:613785|HPRD:01954	12	12p13	complement component 1, r subcomponent	protein-coding	C1R	complement component 1, r subcomponent	O	complement C1r subcomponent	20130505
9606	716	C1S	-	-	HGNC:1247|MIM:120580|Ensembl:ENSG00000182326|HPRD:00397|Vega:OTTHUMG00000150305	12	12p13	complement component 1, s subcomponent	protein-coding	C1S	complement component 1, s subcomponent	O	C1 esterase|basic proline-rich peptide IB-1|complement C1s subcomponent|complement component 1 subcomponent s	20130505
9606	717	C2	DADB-122G4.1	CO2	HGNC:1248|MIM:613927|Ensembl:ENSG00000166278|HPRD:08939|Vega:OTTHUMG00000031190	6	6p21.3	complement component 2	protein-coding	C2	complement component 2	O	C3/C5 convertase|complement C2|complement component C2	20130505
9606	718	C3	-	AHUS5|ARMD9|ASP|C3a|C3b|CPAMD1	HGNC:1318|MIM:120700|Ensembl:ENSG00000125730|HPRD:00400|Vega:OTTHUMG00000150335	19	19p13.3-p13.2	complement component 3	protein-coding	C3	complement component 3	O	C3 and PZP-like alpha-2-macroglobulin domain-containing protein 1|C3a anaphylatoxin|acylation-stimulating protein cleavage product|complement C3|complement component C3|complement component C3a|complement component C3b|prepro-C3	20130512
9606	719	C3AR1	-	AZ3B|C3AR|HNFAG09	HGNC:1319|MIM:605246|Ensembl:ENSG00000171860|HPRD:05581|Vega:OTTHUMG00000168569	12	12p13.31	complement component 3a receptor 1	protein-coding	C3AR1	complement component 3a receptor 1	O	C3a anaphylatoxin chemotactic receptor|C3a-R|complement component 3 receptor 1	20130504
9606	720	C4A	DAMC-258G8.6	C4|C4A2|C4A3|C4A4|C4A6|C4AD|C4S|CO4|CPAMD2|RG	HGNC:1323|MIM:120810|Ensembl:ENSG00000244731|HPRD:00401|Vega:OTTHUMG00000031186	6	6p21.3	complement component 4A (Rodgers blood group)	protein-coding	C4A	complement component 4A (Rodgers blood group)	O	C3 and PZP-like alpha-2-macroglobulin domain-containing protein 2|C4A anaphylatoxin|Rodgers form of C4|acidic C4|acidic complement C4|complement C4-A	20130505
9606	721	C4B	DADB-112B14.11-001	C4B1|C4B12|C4B2|C4B3|C4B5|C4BD|C4B_2|C4F|CH|CO4|CPAMD3	HGNC:1324|MIM:120820|Ensembl:ENSG00000224389|HPRD:00402|HPRD:18631|Vega:OTTHUMG00000031187	6	6p21.3	complement component 4B (Chido blood group)	protein-coding	C4B	complement component 4B (Chido blood group)	O	C3 and PZP-like alpha-2-macroglobulin domain-containing protein 3|Chido form of C4|basic complement C4|complement C4-B|complement C4B1a	20130512
9606	722	C4BPA	RP11-164O23.4	C4BP|PRP	HGNC:1325|MIM:120830|Ensembl:ENSG00000123838|HPRD:00403|Vega:OTTHUMG00000036173	1	1q32	complement component 4 binding protein, alpha	protein-coding	C4BPA	complement component 4 binding protein, alpha	O	C4b-binding protein alpha chain|proline-rich protein	20130505
9606	724	C4BPAP2	RP11-6J21.1	C4BPAL2	HGNC:1327	1	1q32	complement component 4 binding protein, alpha pseudogene 2	pseudo	C4BPAP2	complement component 4 binding protein, alpha pseudogene 2	O	-	20130226
9606	725	C4BPB	RP11-164O23.3	C4BP	HGNC:1328|MIM:120831|Ensembl:ENSG00000123843|HPRD:00404|Vega:OTTHUMG00000036035	1	1q32	complement component 4 binding protein, beta	protein-coding	C4BPB	complement component 4 binding protein, beta	O	C4b-binding protein beta chain	20130505
9606	726	CAPN5	-	HTRA3|nCL-3	HGNC:1482|MIM:602537|Ensembl:ENSG00000149260|HPRD:03963|Vega:OTTHUMG00000165192	11	11q14	calpain 5	protein-coding	CAPN5	calpain 5	O	calpain htra-3|calpain-5|new calpain 3	20130505
9606	727	C5	-	C5a|C5b|CPAMD4	HGNC:1331|MIM:120900|Ensembl:ENSG00000106804|HPRD:00405|Vega:OTTHUMG00000020579	9	9q33-q34	complement component 5	protein-coding	C5	complement component 5	O	C3 and PZP-like alpha-2-macroglobulin domain-containing protein 4|C5a anaphylatoxin|anaphylatoxin C5a analog|complement C5|prepro-C5	20130505
9606	728	C5AR1	-	C5A|C5AR|C5R1|CD88	HGNC:1338|MIM:113995|Ensembl:ENSG00000197405|HPRD:00224|Vega:OTTHUMG00000183504	19	19q13.3-q13.4	complement component 5a receptor 1	protein-coding	C5AR1	complement component 5a receptor 1	O	C5a anaphylatoxin chemotactic receptor|C5a anaphylatoxin receptor|C5a ligand|C5a-R|complement component 5 receptor 1	20130505
9606	729	C6	-	-	HGNC:1339|MIM:217050|Ensembl:ENSG00000039537|HPRD:01956|Vega:OTTHUMG00000094781	5	5p13	complement component 6	protein-coding	C6	complement component 6	O	complement component C6	20130505
9606	730	C7	-	-	HGNC:1346|MIM:217070|Ensembl:ENSG00000112936|HPRD:01957|Vega:OTTHUMG00000150340	5	5p13	complement component 7	protein-coding	C7	complement component 7	O	complement component C7	20130505
9606	731	C8A	-	-	HGNC:1352|MIM:120950|Ensembl:ENSG00000157131|HPRD:00409|Vega:OTTHUMG00000008306	1	1p32	complement component 8, alpha polypeptide	protein-coding	C8A	complement component 8, alpha polypeptide	O	complement component 8 subunit alpha|complement component C8 alpha chain	20130505
9606	732	C8B	-	-	HGNC:1353|MIM:120960|Ensembl:ENSG00000021852|HPRD:00410|Vega:OTTHUMG00000008305	1	1p32	complement component 8, beta polypeptide	protein-coding	C8B	complement component 8, beta polypeptide	O	complement component 8 subunit beta|complement component C8 beta chain	20130505
9606	733	C8G	RP11-229P13.14-003	C8C	HGNC:1354|MIM:120930|Ensembl:ENSG00000176919|HPRD:00407|Vega:OTTHUMG00000020955	9	9q34.3	complement component 8, gamma polypeptide	protein-coding	C8G	complement component 8, gamma polypeptide	O	complement component C8 gamma chain	20130505
9606	734	OSGIN2	-	C8orf1|hT41	HGNC:1355|MIM:604598|Ensembl:ENSG00000164823|HPRD:06853|Vega:OTTHUMG00000163811	8	8q21	oxidative stress induced growth inhibitor family member 2	protein-coding	OSGIN2	oxidative stress induced growth inhibitor family member 2	O	oxidative stress-induced growth inhibitor 2	20130505
9606	735	C9	-	-	HGNC:1358|MIM:120940|Ensembl:ENSG00000113600|HPRD:00408|Vega:OTTHUMG00000094767	5	5p14-p12	complement component 9	protein-coding	C9	complement component 9	O	complement component C9	20130505
9606	738	VPS51	PP5382	ANG2|ANG3|C11orf2|C11orf3|FFR	HGNC:1172|Ensembl:ENSG00000149823|HPRD:12605|Vega:OTTHUMG00000165600	11	11q13	vacuolar protein sorting 51 homolog (S. cerevisiae)	protein-coding	VPS51	vacuolar protein sorting 51 homolog (S. cerevisiae)	O	another new gene 2 protein|protein fat-free homolog|vacuolar protein sorting-associated protein 51 homolog	20130505
9606	740	MRPL49	OK/SW-cl.67	C11orf4|L49mt|MRP-L49|NOF|NOF1	HGNC:1176|MIM:606866|Ensembl:ENSG00000149792|HPRD:06037|Vega:OTTHUMG00000165608	11	11q13	mitochondrial ribosomal protein L49	protein-coding	MRPL49	mitochondrial ribosomal protein L49	O	39S ribosomal protein L49, mitochondrial|neighbor of FAU|next to FAU	20130505
9606	741	ZNHIT2	-	C11orf5|FON	HGNC:1177|MIM:604575|Ensembl:ENSG00000174276|HPRD:05200|Vega:OTTHUMG00000165604	11	11q13	zinc finger, HIT-type containing 2	protein-coding	ZNHIT2	zinc finger, HIT-type containing 2	O	zinc finger HIT domain-containing protein 2|zinc finger, HIT domain containing 2|zinc finger, HIT type 2	20130505
9606	744	MPPED2	-	239FB|C11orf8	HGNC:1180|MIM:600911|Ensembl:ENSG00000066382|HPRD:02947|Vega:OTTHUMG00000166159	11	11p13	metallophosphoesterase domain containing 2	protein-coding	MPPED2	metallophosphoesterase domain containing 2	O	fetal brain protein 239|metallophosphoesterase MPPED2|metallophosphoesterase domain-containing protein 2	20130505
9606	745	MYRF	-	C11orf9|MRF|Ndt80|pqn-47	HGNC:1181|MIM:608329|Ensembl:ENSG00000124920|HPRD:12213|Vega:OTTHUMG00000168161	11	11q12-q13.1	myelin regulatory factor	protein-coding	MYRF	myelin regulatory factor	O	myelin gene regulatory factor	20130505
9606	746	TMEM258	HSPC005	C11orf10	HGNC:1164|Ensembl:ENSG00000134825|HPRD:12602|Vega:OTTHUMG00000168172	11	11q12.2	transmembrane protein 258	protein-coding	TMEM258	transmembrane protein 258	O	UPF0197 transmembrane protein C11orf10	20130505
9606	747	DAGLA	-	C11orf11|DAGL(ALPHA)|DAGLALPHA|NSDDR	HGNC:1165|MIM:614015|Ensembl:ENSG00000134780|HPRD:07092|Vega:OTTHUMG00000168160	11	11q12.2	diacylglycerol lipase, alpha	protein-coding	DAGLA	diacylglycerol lipase, alpha	O	DGL-alpha|neural stem cell-derived dendrite regulator|sn1-specific diacylglycerol lipase alpha	20130504
9606	750	C16orf3	-	-	HGNC:1197|MIM:605179|Ensembl:ENSG00000221819|HPRD:05534|Vega:OTTHUMG00000172804	16	16q24.3	chromosome 16 open reading frame 3	protein-coding	C16orf3	chromosome 16 open reading frame 3	O	uncharacterized protein C16orf3	20130226
9606	752	FMNL1	-	C17orf1|C17orf1B|FHOD4|FMNL|KW-13	HGNC:1212|MIM:604656|Ensembl:ENSG00000184922|HPRD:06876|Vega:OTTHUMG00000180196	17	17q21	formin-like 1	protein-coding	FMNL1	formin-like 1	O	CLL-associated antigen KW-13|formin-like protein 1|leukocyte formin	20130505
9606	753	LDLRAD4	-	C18orf1	HGNC:1224|MIM:606571|Ensembl:ENSG00000168675|HPRD:07358|Vega:OTTHUMG00000181925	18	18p11.21	low density lipoprotein receptor class A domain containing 4	protein-coding	LDLRAD4	low density lipoprotein receptor class A domain containing 4	O	clone 22|low-density lipoprotein receptor class A domain-containing protein 4	20130505
9606	754	PTTG1IP	-	C21orf1|C21orf3|PBF	HGNC:13524|MIM:603784|Ensembl:ENSG00000183255|HPRD:04807|Vega:OTTHUMG00000090254	21	21q22.3	pituitary tumor-transforming 1 interacting protein	protein-coding	PTTG1IP	pituitary tumor-transforming 1 interacting protein	O	PTTG-binding factor|pituitary tumor-transforming gene 1 protein-interacting protein|pituitary tumor-transforming gene protein-binding factor	20130505
9606	755	C21orf2	-	YF5/A2	HGNC:1260|MIM:603191|Ensembl:ENSG00000160226|Vega:OTTHUMG00000086909	21	21q22.3	chromosome 21 open reading frame 2	protein-coding	C21orf2	chromosome 21 open reading frame 2	O	nuclear encoded mitochondrial protein C21orf2	20130505
9606	757	TMEM50B	UNQ167/PRO193	C21orf4|HCVP7TP3	HGNC:1280|Ensembl:ENSG00000142188|HPRD:10747|Vega:OTTHUMG00000065286	21	21q22.11	transmembrane protein 50B	protein-coding	TMEM50B	transmembrane protein 50B	O	HCV p7-trans-regulated protein 3|HCV p7-transregulated protein 3	20130330
9606	758	MPPED1	RP4-754E20__B.2	239AB|C22orf1|FAM1A	HGNC:1306|MIM:602112|Ensembl:ENSG00000186732|HPRD:03663|Vega:OTTHUMG00000150566	22	22q13.31	metallophosphoesterase domain containing 1	protein-coding	MPPED1	metallophosphoesterase domain containing 1	O	adult brain protein 239|metallophosphoesterase domain-containing protein 1	20130505
9606	759	CA1	-	CA-I|CAB|Car1	HGNC:1368|MIM:114800|Ensembl:ENSG00000133742|HPRD:00265|Vega:OTTHUMG00000164941	8	8q21.2	carbonic anhydrase I	protein-coding	CA1	carbonic anhydrase I	O	carbonate dehydratase I|carbonic anhydrase 1|carbonic anhydrase B|carbonic dehydratase	20130505
9606	760	CA2	-	CA-II|CAC|CAII|Car2	HGNC:1373|MIM:611492|Ensembl:ENSG00000104267|HPRD:02023|Vega:OTTHUMG00000164944	8	8q22	carbonic anhydrase II	protein-coding	CA2	carbonic anhydrase II	O	carbonate dehydratase II|carbonic anhydrase 2|carbonic anhydrase B|carbonic anhydrase C|carbonic dehydratase	20130505
9606	761	CA3	-	CAIII|Car3	HGNC:1374|MIM:114750|Ensembl:ENSG00000164879|HPRD:00260|Vega:OTTHUMG00000164942	8	8q21.2	carbonic anhydrase III, muscle specific	protein-coding	CA3	carbonic anhydrase III, muscle specific	O	CA-III|carbonate dehydratase III|carbonic anhydrase 3	20130226
9606	762	CA4	-	CAIV|Car4|RP17	HGNC:1375|MIM:114760|Ensembl:ENSG00000167434|HPRD:00261|Vega:OTTHUMG00000179987	17	17q23	carbonic anhydrase IV	protein-coding	CA4	carbonic anhydrase IV	O	CA-IV|carbonate dehydratase IV|carbonic anhydrase 4|carbonic dehydratase IV	20130505
9606	763	CA5A	-	CA5|CAV|CAVA	HGNC:1377|MIM:114761|Ensembl:ENSG00000174990|HPRD:00262|Vega:OTTHUMG00000137677	16	16q24.3	carbonic anhydrase VA, mitochondrial	protein-coding	CA5A	carbonic anhydrase VA, mitochondrial	O	CA-VA|carbonate dehydratase VA|carbonic anhydrase 5A, mitochondrial|carbonic anhydrase V, mitochondrial|carbonic dehydratase	20130505
9606	764	CA5AP1	-	CA5P	HGNC:1379	16	16p11.2	carbonic anhydrase VA pseudogene 1	pseudo	CA5AP1	carbonic anhydrase VA pseudogene 1	O	-	20130226
9606	765	CA6	RP3-477M7.7	CA-VI|GUSTIN	HGNC:1380|MIM:114780|Ensembl:ENSG00000131686|HPRD:00264|Vega:OTTHUMG00000001763	1	1p36.2	carbonic anhydrase VI	protein-coding	CA6	carbonic anhydrase VI	O	carbonate dehydratase VI|carbonic anhydrase 6|salivary carbonic anhydrase|secreted carbonic anhydrase	20130502
9606	766	CA7	-	CAVII	HGNC:1381|MIM:114770|Ensembl:ENSG00000168748|HPRD:00263|Vega:OTTHUMG00000137524	16	16q22.1	carbonic anhydrase VII	protein-coding	CA7	carbonic anhydrase VII	O	CA-VII|carbonate dehydratase VII|carbonic anhydrase 7|carbonic dehydratase VII	20130226
9606	767	CA8	-	CA-VIII|CALS|CAMRQ3|CARP	HGNC:1382|MIM:114815|HPRD:00266	8	8q12.1	carbonic anhydrase VIII	protein-coding	CA8	carbonic anhydrase VIII	O	CA-related protein|carbonate dehydratase|carbonic anhydrase-like sequence|carbonic anhydrase-related protein	20130505
9606	768	CA9	-	CAIX|MN	HGNC:1383|MIM:603179|Ensembl:ENSG00000107159|HPRD:04417|Vega:OTTHUMG00000021029	9	9p13.3	carbonic anhydrase IX	protein-coding	CA9	carbonic anhydrase IX	O	CA-IX|P54/58N|RCC-associated antigen G250|RCC-associated protein G250|carbonate dehydratase IX|carbonic anhydrase 9|carbonic dehydratase|membrane antigen MN|pMW1|renal cell carcinoma-associated antigen G250	20130505
9606	770	CA11	UNQ211/PRO237	CARPX1	HGNC:1370|MIM:604644|Ensembl:ENSG00000063180|HPRD:05225|Vega:OTTHUMG00000183320	19	19q13.3	carbonic anhydrase XI	protein-coding	CA11	carbonic anhydrase XI	O	CA-RP II|CA-XI|CARP XI|CARP-2|carbonic anhydrase-related protein 11|carbonic anhydrase-related protein 2|carbonic anhydrase-related protein XI	20130505
9606	771	CA12	-	CAXII|HsT18816	HGNC:1371|MIM:603263|HPRD:04464	15	15q22	carbonic anhydrase XII	protein-coding	CA12	carbonic anhydrase XII	O	CA-XII|carbonate dehydratase XII|carbonic anhydrase 12|carbonic dehydratase|tumor antigen HOM-RCC-3.1.3	20130505
9606	772	CACD	-	-	HGNC:1387|MIM:215500	17	17p13	central areolar choroidal dystrophy	unknown	CACD	central areolar choroidal dystrophy	O	-	20130226
9606	773	CACNA1A	-	APCA|BI|CACNL1A4|CAV2.1|EA2|FHM|HPCA|MHP|MHP1|SCA6	HGNC:1388|MIM:601011|Ensembl:ENSG00000141837|HPRD:03004|Vega:OTTHUMG00000044590	19	19p13	calcium channel, voltage-dependent, P/Q type, alpha 1A subunit	protein-coding	CACNA1A	calcium channel, voltage-dependent, P/Q type, alpha 1A subunit	O	brain calcium channel 1|brain calcium channel I|calcium channel, L type, alpha-1 polypeptide|voltage-dependent P/Q-type calcium channel subunit alpha-1A|voltage-gated calcium channel subunit alpha Cav2.1	20130505
9606	774	CACNA1B	-	BIII|CACNL1A5|CACNN|Cav2.2	HGNC:1389|MIM:601012|Ensembl:ENSG00000148408|HPRD:03005|Vega:OTTHUMG00000021002	9	9q34	calcium channel, voltage-dependent, N type, alpha 1B subunit	protein-coding	CACNA1B	calcium channel, voltage-dependent, N type, alpha 1B subunit	O	Cav2.2 voltage-gated Ca2+ channel|brain calcium channel III|calcium channel alpha12.2 subunit|calcium channel, L type, alpha-1 polypeptide|calcium channel, N type|calcium channel, voltage-dependent, L type, alpha 1B subunit|calcium channel, voltage-dependent, alpha 1B subunit, N type|voltage-dependent N-type calcium channel subunit alpha-1B|voltage-gated calcium channel alpha subunit Cav2.2|volta…	20130505
9606	775	CACNA1C	-	CACH2|CACN2|CACNL1A1|CCHL1A1|CaV1.2|LQT8|TS	HGNC:1390|MIM:114205|HPRD:00246	12	12p13.3	calcium channel, voltage-dependent, L type, alpha 1C subunit	protein-coding	CACNA1C	calcium channel, voltage-dependent, L type, alpha 1C subunit	O	DHPR, alpha-1 subunit|calcium channel, L type, alpha-1 polypeptide, isoform 1, cardiac muscle|calcium channel, cardic dihydropyridine-sensitive, alpha-1 subunit|voltage-dependent L-type calcium channel subunit alpha-1C|voltage-gated L-type calcium channel Cav1.2 alpha 1 subunit, splice variant 10*	20130505
9606	776	CACNA1D	-	CACH3|CACN4|CACNL1A2|CCHL1A2|Cav1.3|SANDD	HGNC:1391|MIM:114206|Ensembl:ENSG00000157388|HPRD:00247|Vega:OTTHUMG00000158278	3	3p14.3	calcium channel, voltage-dependent, L type, alpha 1D subunit	protein-coding	CACNA1D	calcium channel, voltage-dependent, L type, alpha 1D subunit	O	calcium channel, L type, alpha-1 polypeptide|calcium channel, neuroendocrine/brain-type, alpha 1 subunit|voltage-dependent L-type calcium channel subunit alpha-1D|voltage-gated calcium channel alpha 1 subunit|voltage-gated calcium channel alpha subunit Cav1.3	20130505
9606	777	CACNA1E	-	BII|CACH6|CACNL1A6|Cav2.3	HGNC:1392|MIM:601013|Ensembl:ENSG00000198216|HPRD:03006|Vega:OTTHUMG00000037301	1	1q25.3	calcium channel, voltage-dependent, R type, alpha 1E subunit	protein-coding	CACNA1E	calcium channel, voltage-dependent, R type, alpha 1E subunit	O	brain calcium channel II|calcium channel, L type, alpha-1 polypeptide|calcium channel, R type, alpha-1 polypeptide|calcium channel, voltage-dependent, alpha 1E subunit|voltage-dependent R-type calcium channel subunit alpha-1E|voltage-dependent calcium channel alpha 1E subunit|voltage-gated calcium channel alpha 1E subunit|voltage-gated calcium channel alpha subunit Cav2.3|voltage-gated calcium ch…	20130505
9606	778	CACNA1F	-	AIED|COD3|COD4|CORDX|CORDX3|CSNB2|CSNB2A|CSNBX2|Cav1.4|JM8|JMC8|OA2	HGNC:1393|MIM:300110|Ensembl:ENSG00000102001|HPRD:02119|Vega:OTTHUMG00000022703	X	Xp11.23	calcium channel, voltage-dependent, L type, alpha 1F subunit	protein-coding	CACNA1F	calcium channel, voltage-dependent, L type, alpha 1F subunit	O	Aland island eye disease (Forsius-Eriksson ocular albinism, ocular albinism type 2)|Cav1.4alpha1|voltage gated calcium channel alpha 1F subunit|voltage-dependent L-type calcium channel subunit alpha-1F|voltage-gated calcium channel subunit alpha Cav1.4	20130505
9606	779	CACNA1S	-	CACNL1A3|CCHL1A3|Cav1.1|HOKPP|HOKPP1|MHS5|TTPP1|hypoPP	HGNC:1397|MIM:114208|Ensembl:ENSG00000081248|HPRD:00248|Vega:OTTHUMG00000035784	1	1q32	calcium channel, voltage-dependent, L type, alpha 1S subunit	protein-coding	CACNA1S	calcium channel, voltage-dependent, L type, alpha 1S subunit	O	calcium channel, L type, alpha 1 polypeptide, isoform 3 (skeletal muscle, hypokalemic periodic paralysis)|dihydropyridine receptor|dihydropyridine-sensitive L-type calcium channel alpha-1 subunit|voltage-dependent L-type calcium channel subunit alpha-1S|voltage-gated calcium channel subunit alpha Cav1.1	20130505
9606	780	DDR1	DAAP-278B20.1	CAK|CD167|DDR|EDDR1|HGK2|MCK10|NEP|NTRK4|PTK3|PTK3A|RTK6|TRKE	HGNC:2730|MIM:600408|Ensembl:ENSG00000204580|HPRD:02678|Vega:OTTHUMG00000031236	6	6p21.3	discoidin domain receptor tyrosine kinase 1	protein-coding	DDR1	discoidin domain receptor tyrosine kinase 1	O	CD167 antigen-like family member A|PTK3A protein tyrosine kinase 3A|cell adhesion kinase|epithelial discoidin domain-containing receptor 1|mammary carcinoma kinase 10|neuroepithelial tyrosine kinase|neurotrophic tyrosine kinase, receptor, type 4|protein-tyrosine kinase RTK-6|tyrosine kinase DDR|tyrosine-protein kinase CAK	20130505
9606	781	CACNA2D1	H_DJ0560O14.1	CACNA2|CACNL2A|CCHL2A	HGNC:1399|MIM:114204|Ensembl:ENSG00000153956|HPRD:00245	7	7q21-q22	calcium channel, voltage-dependent, alpha 2/delta subunit 1	protein-coding	CACNA2D1	calcium channel, voltage-dependent, alpha 2/delta subunit 1	O	calcium channel, L type, alpha 2 polypeptide|dihydropyridine-sensitive L-type, calcium channel alpha-2/delta subunit|voltage-dependent calcium channel subunit alpha-2/delta-1|voltage-gated calcium channel subunit alpha-2/delta-1	20130505
9606	782	CACNB1	-	CAB1|CACNLB1|CCHLB1	HGNC:1401|MIM:114207|Ensembl:ENSG00000067191|HPRD:11743|Vega:OTTHUMG00000133217	17	17q21-q22	calcium channel, voltage-dependent, beta 1 subunit	protein-coding	CACNB1	calcium channel, voltage-dependent, beta 1 subunit	O	calcium channel voltage-dependent subunit beta 1|calcium channel, L type, beta 1 polypeptide|dihydropyridine-sensitive L-type, calcium channel beta-1 subunit|voltage-dependent L-type calcium channel subunit beta-1	20130505
9606	783	CACNB2	RP11-383B4.2	CACNLB2|CAVB2|MYSB	HGNC:1402|MIM:600003|Ensembl:ENSG00000165995|HPRD:02473|Vega:OTTHUMG00000017764	10	10p12	calcium channel, voltage-dependent, beta 2 subunit	protein-coding	CACNB2	calcium channel, voltage-dependent, beta 2 subunit	O	CAB2|calcium channel voltage-dependent subunit beta 2|lambert-Eaton myasthenic syndrome antigen B|myasthenic (Lambert-Eaton) syndrome antigen B|voltage-dependent L-type calcium channel subunit beta-2	20130504
9606	784	CACNB3	-	CAB3|CACNLB3	HGNC:1403|MIM:601958|Ensembl:ENSG00000167535|HPRD:11879|Vega:OTTHUMG00000170398	12	12q13	calcium channel, voltage-dependent, beta 3 subunit	protein-coding	CACNB3	calcium channel, voltage-dependent, beta 3 subunit	O	voltage-dependent L-type calcium channel subunit beta-3	20130505
9606	785	CACNB4	-	CAB4|CACNLB4|EA5|EIG9|EJM|EJM4|EJM6	HGNC:1404|MIM:601949|Ensembl:ENSG00000182389|HPRD:09057|Vega:OTTHUMG00000155091	2	2q22-q23	calcium channel, voltage-dependent, beta 4 subunit	protein-coding	CACNB4	calcium channel, voltage-dependent, beta 4 subunit	O	calcium channel voltage-dependent subunit beta 4|dihydropyridine-sensitive L-type, calcium channel beta-4 subunit|voltage-dependent L-type calcium channel subunit beta-4	20130505
9606	786	CACNG1	-	CACNLG	HGNC:1405|MIM:114209|Ensembl:ENSG00000108878|HPRD:00249|Vega:OTTHUMG00000179553	17	17q24	calcium channel, voltage-dependent, gamma subunit 1	protein-coding	CACNG1	calcium channel, voltage-dependent, gamma subunit 1	O	L-type calcium channel gamma polypeptide|dihydropyridine-sensitive L-type, skeletal muscle calcium channel subunit gamma|neuronal dihydropyridine-sensitive calcium channel gamma subunit|voltage-dependent calcium channel gamma-1 subunit	20130504
9606	788	SLC25A20	-	CAC|CACT	HGNC:1421|MIM:613698|Ensembl:ENSG00000178537|HPRD:01953|Vega:OTTHUMG00000133538	3	3p21.31	solute carrier family 25 (carnitine/acylcarnitine translocase), member 20	protein-coding	SLC25A20	solute carrier family 25 (carnitine/acylcarnitine translocase), member 20	O	mitochondrial carnitine/acylcarnitine carrier protein	20130505
9606	789	SLC25A20P1	-	CACTP|SLC25A20P	HGNC:1422	6	6p12	solute carrier family 25 (carnitine/acylcarnitine translocase), member 20 pseudogene 1	pseudo	SLC25A20P1	solute carrier family 25 (carnitine/acylcarnitine translocase), member 20 pseudogene 1	O	-	20130226
9606	790	CAD	-	-	HGNC:1424|MIM:114010|Ensembl:ENSG00000084774|HPRD:06437|Vega:OTTHUMG00000097070	2	2p22-p21	carbamoyl-phosphate synthetase 2, aspartate transcarbamylase, and dihydroorotase	protein-coding	CAD	carbamoyl-phosphate synthetase 2, aspartate transcarbamylase, and dihydroorotase	O	CAD protein|CAD trifunctional protein|multifunctional protein CAD	20130512
9606	793	CALB1	-	CALB	HGNC:1434|MIM:114050|Ensembl:ENSG00000104327|HPRD:00229|Vega:OTTHUMG00000134314	8	8q21.3	calbindin 1, 28kDa	protein-coding	CALB1	calbindin 1, 28kDa	O	D-28K|RTVL-H protein|calbindin|calbindin 1, (28kD)|calbindin D28|vitamin D-dependent calcium-binding protein, avian-type	20130505
9606	794	CALB2	-	CAB29|CAL2|CR	HGNC:1435|MIM:114051|Ensembl:ENSG00000172137|HPRD:00230|Vega:OTTHUMG00000137589	16	16q22.2	calbindin 2	protein-coding	CALB2	calbindin 2	O	29 kDa calbindin|calbindin 2, (29kD, calretinin)|calbindin D29K|calretinin	20130505
9606	795	S100G	-	CABP|CABP1|CABP9K|CALB3	HGNC:1436|MIM:302020|Ensembl:ENSG00000169906|HPRD:02360|Vega:OTTHUMG00000021194	X	Xp22.2	S100 calcium binding protein G	protein-coding	S100G	S100 calcium binding protein G	O	S100 calcium-binding protein G|calbindin 3, (vitamin D-dependent calcium-binding protein)|calbindin D9K|calbindin-D9K|protein S100-G|vitamin D-dependent calcium-binding protein, intestinal	20130428
9606	796	CALCA	-	CALC1|CGRP|CGRP-I|CGRP1|CT|KC	HGNC:1437|MIM:114130|Ensembl:ENSG00000110680|HPRD:00238|Vega:OTTHUMG00000159731	11	11p15.2	calcitonin-related polypeptide alpha	protein-coding	CALCA	calcitonin-related polypeptide alpha	O	alpha-type CGRP|calcitonin|calcitonin 1|calcitonin gene-related peptide I|calcitonin/calcitonin-related polypeptide, alpha|katacalcin	20130505
9606	797	CALCB	-	CALC2|CGRP-II|CGRP2	HGNC:1438|MIM:114160|Ensembl:ENSG00000175868|HPRD:11742|Vega:OTTHUMG00000164629	11	11p15.2-p15.1	calcitonin-related polypeptide beta	protein-coding	CALCB	calcitonin-related polypeptide beta	O	beta-CGRP|beta-type CGRP|calcitonin 2|calcitonin gene-related peptide 2|calcitonin gene-related peptide II	20130226
9606	798	CALCP	-	CALC3	HGNC:1439	11	11p15.1	calcitonin pseudogene	pseudo	CALCP	calcitonin pseudogene	O	-	20130226
9606	799	CALCR	-	CRT|CT-R|CTR|CTR1	HGNC:1440|MIM:114131|Ensembl:ENSG00000004948|HPRD:00239|Vega:OTTHUMG00000023599	7	7q21.3	calcitonin receptor	protein-coding	CALCR	calcitonin receptor	O	-	20130505
9606	800	CALD1	-	CDM|H-CAD|HCAD|L-CAD|LCAD|NAG22	HGNC:1441|MIM:114213|Ensembl:ENSG00000122786|HPRD:00251|Vega:OTTHUMG00000155407	7	7q33	caldesmon 1	protein-coding	CALD1	caldesmon 1	O	caldesmon	20130505
9606	801	CALM1	-	CALML2|CAMI|CPVT4|DD132|PHKD|caM	HGNC:1442|MIM:114180|Ensembl:ENSG00000198668|HPRD:00241|Vega:OTTHUMG00000171044	14	14q32.11	calmodulin 1 (phosphorylase kinase, delta)	protein-coding	CALM1	calmodulin 1 (phosphorylase kinase, delta)	O	calmodulin|phosphorylase kinase, delta subunit|prepro-calmodulin 1	20130505
9606	802	CALM1P1	-	CALML1	HGNC:1443	X	Xq21.33	calmodulin 1 (phosphorylase kinase, delta) pseudogene 1	pseudo	CALM1P1	calmodulin 1 (phosphorylase kinase, delta) pseudogene 1	O	-	20130226
9606	804	CALM1P2	-	-	HGNC:1444	7	7p11.2	calmodulin 1 (phosphorylase kinase, delta) pseudogene 2	pseudo	CALM1P2	calmodulin 1 (phosphorylase kinase, delta) pseudogene 2	O	-	20130226
9606	805	CALM2	-	CAMII|PHKD|PHKD2	HGNC:1445|MIM:114182|Ensembl:ENSG00000143933|HPRD:00242|Vega:OTTHUMG00000128850	2	2p21	calmodulin 2 (phosphorylase kinase, delta)	protein-coding	CALM2	calmodulin 2 (phosphorylase kinase, delta)	O	LP7057 protein|caM|calmodulin|phosphorylase kinase delta|prepro-calmodulin 2	20130505
9606	806	CALM2P2	-	-	HGNC:1447	10	10q22.1	calmodulin 2 pseudogene 2	pseudo	CALM2P2	calmodulin 2 pseudogene 2	O	-	20130226
9606	807	CALM2P3	-	-	HGNC:1448	13	13q14.11	calmodulin 2 pseudogene 3	pseudo	CALM2P3	calmodulin 2 pseudogene 3	O	-	20130226
9606	808	CALM3	-	PHKD|PHKD3	HGNC:1449|MIM:114183|Ensembl:ENSG00000160014|HPRD:00243|Vega:OTTHUMG00000133517	19	19q13.2-q13.3	calmodulin 3 (phosphorylase kinase, delta)	protein-coding	CALM3	calmodulin 3 (phosphorylase kinase, delta)	O	caM|calmodulin|prepro-calmodulin 3	20130505
9606	810	CALML3	-	CLP	HGNC:1452|MIM:114184|Ensembl:ENSG00000178363|HPRD:00244|Vega:OTTHUMG00000017597	10	10p15.1	calmodulin-like 3	protein-coding	CALML3	calmodulin-like 3	O	caM-like protein|calmodulin-like protein 3|calmodulin-related protein NB-1	20130505
9606	811	CALR	-	CRT|RO|SSA|cC1qR	HGNC:1455|MIM:109091|Ensembl:ENSG00000179218|HPRD:00169|Vega:OTTHUMG00000180574	19	19p13.3-p13.2	calreticulin	protein-coding	CALR	calreticulin	O	CRP55|ERp60|HACBP|Sicca syndrome antigen A (autoantigen Ro; calreticulin)|calregulin|endoplasmic reticulum resident protein 60|grp60	20130512
9606	813	CALU	-	-	HGNC:1458|MIM:603420|HPRD:04569	7	7q32.1	calumenin	protein-coding	CALU	calumenin	O	IEF SSP 9302|crocalbin-like protein|multiple EF-hand protein	20130505
9606	814	CAMK4	-	CaMK IV|CaMK-GR|IV|caMK	HGNC:1464|MIM:114080|HPRD:07169	5	5q21.3	calcium/calmodulin-dependent protein kinase IV	protein-coding	CAMK4	calcium/calmodulin-dependent protein kinase IV	O	CAM kinase IV|CAM kinase- GR|brain Ca(2+)-calmodulin-dependent protein kinase type IV|brain Ca++-calmodulin-dependent protein kinase type IV|caM kinase-GR|calcium/calmodulin-dependent protein kinase type IV|calcium/calmodulin-dependent protein kinase type IV catalytic chain	20130512
9606	815	CAMK2A	-	CAMKA	HGNC:1460|MIM:114078|Ensembl:ENSG00000070808|HPRD:06532|Vega:OTTHUMG00000134281	5	5q32	calcium/calmodulin-dependent protein kinase II alpha	protein-coding	CAMK2A	calcium/calmodulin-dependent protein kinase II alpha	O	CaM kinase II alpha subunit|CaM-kinase II alpha chain|CaMK-II alpha subunit|CaMKIINalpha|caM kinase II subunit alpha|caMK-II subunit alpha|calcium/calmodulin-dependent protein kinase (CaM kinase) II alpha|calcium/calmodulin-dependent protein kinase II alpha-B subunit|calcium/calmodulin-dependent protein kinase type II alpha chain|calcium/calmodulin-dependent protein kinase type II subunit alpha	20130505
9606	816	CAMK2B	-	CAM2|CAMK2|CAMKB	HGNC:1461|MIM:607707|Ensembl:ENSG00000058404|HPRD:12127|Vega:OTTHUMG00000023491	7	7p14.3-p14.1	calcium/calmodulin-dependent protein kinase II beta	protein-coding	CAMK2B	calcium/calmodulin-dependent protein kinase II beta	O	CaM kinase II beta subunit|CaM-kinase II beta chain|caMK-II subunit beta|calcium/calmodulin-dependent protein kinase type II subunit beta|proline rich calmodulin-dependent protein kinase	20130505
9606	817	CAMK2D	-	CAMKD	HGNC:1462|MIM:607708|Ensembl:ENSG00000145349|HPRD:09653|Vega:OTTHUMG00000132910	4	4q26	calcium/calmodulin-dependent protein kinase II delta	protein-coding	CAMK2D	calcium/calmodulin-dependent protein kinase II delta	O	CaM kinase II delta subunit|CaM-kinase II delta chain|CaMK-II delta subunit|caM kinase II subunit delta|caMK-II subunit delta|calcium/calmodulin-dependent protein kinase (CaM kinase) II delta|calcium/calmodulin-dependent protein kinase type II delta chain|calcium/calmodulin-dependent protein kinase type II subunit delta	20130505
9606	818	CAMK2G	RP11-574K11.6	CAMK|CAMK-II|CAMKG	HGNC:1463|MIM:602123|Ensembl:ENSG00000148660|HPRD:03672|Vega:OTTHUMG00000018492	10	10q22	calcium/calmodulin-dependent protein kinase II gamma	protein-coding	CAMK2G	calcium/calmodulin-dependent protein kinase II gamma	O	caMK-II subunit gamma|calcium/calmodulin-dependent protein kinase (CaM kinase) II gamma|calcium/calmodulin-dependent protein kinase type II subunit gamma	20130505
9606	819	CAMLG	-	CAML	HGNC:1471|MIM:601118|Ensembl:ENSG00000164615|HPRD:03073|Vega:OTTHUMG00000129116	5	5q23	calcium modulating ligand	protein-coding	CAMLG	calcium modulating ligand	O	calcium signal-modulating cyclophilin ligand|calcium-modulating cyclophilin ligand|calcium-signal modulating cyclophilin ligand|cyclophilin B-binding protein	20130505
9606	820	CAMP	HSD26	CAP-18|CAP18|CRAMP|FALL-39|FALL39|LL37	HGNC:1472|MIM:600474|Ensembl:ENSG00000164047|HPRD:02722|Vega:OTTHUMG00000133526	3	3p21.3	cathelicidin antimicrobial peptide	protein-coding	CAMP	cathelicidin antimicrobial peptide	O	18 kDa cationic antimicrobial protein	20130505
9606	821	CANX	-	CNX|IP90|P90	HGNC:1473|MIM:114217|Ensembl:ENSG00000127022|HPRD:00252|Vega:OTTHUMG00000130910	5	5q35	calnexin	protein-coding	CANX	calnexin	O	major histocompatibility complex class I antigen-binding protein p88	20130505
9606	822	CAPG	-	AFCP|MCP	HGNC:1474|MIM:153615|Ensembl:ENSG00000042493|HPRD:01088|Vega:OTTHUMG00000130183	2	2p11.2	capping protein (actin filament), gelsolin-like	protein-coding	CAPG	capping protein (actin filament), gelsolin-like	O	actin regulatory protein CAP-G|actin-regulatory protein CAP-G|gelsolin-like capping protein|macrophage capping protein|macrophage-capping protein	20130505
9606	823	CAPN1	PIG30	CANP|CANP1|CANPL1|muCANP|muCL	HGNC:1476|MIM:114220|Ensembl:ENSG00000014216|HPRD:00253|Vega:OTTHUMG00000165614	11	11q13	calpain 1, (mu/I) large subunit	protein-coding	CAPN1	calpain 1, (mu/I) large subunit	O	CANP 1|calcium-activated neutral proteinase 1|calpain mu-type|calpain, large polypeptide L1|calpain-1 catalytic subunit|calpain-1 large subunit|cell proliferation-inducing gene 30 protein|cell proliferation-inducing protein 30|micromolar-calpain	20130505
9606	824	CAPN2	-	CANP2|CANPL2|CANPml|mCANP	HGNC:1479|MIM:114230|Ensembl:ENSG00000162909|HPRD:00254|Vega:OTTHUMG00000037376	1	1q41-q42	calpain 2, (m/II) large subunit	protein-coding	CAPN2	calpain 2, (m/II) large subunit	O	CANP 2|M-calpain|calcium-activated neutral proteinase 2|calpain 2, large [catalytic] subunit|calpain 2, large subunit|calpain M-type|calpain large polypeptide L2|calpain, large polypeptide L2|calpain-2 catalytic subunit|calpain-2 large subunit|millimolar-calpain	20130505
9606	825	CAPN3	-	CANP3|CANPL3|LGMD2|LGMD2A|nCL-1|p94	HGNC:1480|MIM:114240|Ensembl:ENSG00000092529|HPRD:00255|Vega:OTTHUMG00000130619	15	15q15.1	calpain 3, (p94)	protein-coding	CAPN3	calpain 3, (p94)	O	calcium-activated neutral proteinase 3|calpain L3|calpain p94, large [catalytic] subunit|calpain, large polypeptide L3|calpain-3|muscle-specific calcium-activated neutral protease 3 large subunit|new calpain 1	20130505
9606	826	CAPNS1	-	30K|CALPAIN4|CANP|CANPS|CAPN4|CDPS|CSS1	HGNC:1481|MIM:114170|Ensembl:ENSG00000126247|HPRD:00240|Vega:OTTHUMG00000160811	19	19q13.12	calpain, small subunit 1	protein-coding	CAPNS1	calpain, small subunit 1	O	CANP small subunit|calcium-activated neutral proteinase small subunit|calcium-dependent protease small subunit 1|calcium-dependent protease, small subunit|calpain 4, small subunit (30K)|calpain regulatory subunit|calpain small subunit 1|calpain, small polypeptide	20130505
9606	827	CAPN6	-	CANPX|CAPNX|CalpM|DJ914P14.1	HGNC:1483|MIM:300146|Ensembl:ENSG00000077274|HPRD:02145|Vega:OTTHUMG00000022203	X	Xq23	calpain 6	protein-coding	CAPN6	calpain 6	O	calpain-6|calpain-like protease X-linked|calpamodulin	20130226
9606	828	CAPS	-	CAPS1	HGNC:1487|MIM:114212|HPRD:00250	19	19p13.3	calcyphosine	protein-coding	CAPS	calcyphosine	O	calcyphosin|calcyphosine 1|thyroid protein p24	20130226
9606	829	CAPZA1	-	CAPPA1|CAPZ|CAZ1	HGNC:1488|MIM:601580|Ensembl:ENSG00000116489|HPRD:03347|Vega:OTTHUMG00000011769	1	1p13.2	capping protein (actin filament) muscle Z-line, alpha 1	protein-coding	CAPZA1	capping protein (actin filament) muscle Z-line, alpha 1	O	Cap Z|F-actin-capping protein subunit alpha-1|capZ alpha-1	20130505
9606	830	CAPZA2	-	CAPPA2|CAPZ	HGNC:1490|MIM:601571|Ensembl:ENSG00000198898|HPRD:11871|Vega:OTTHUMG00000023185	7	7q31.2-q31.3	capping protein (actin filament) muscle Z-line, alpha 2	protein-coding	CAPZA2	capping protein (actin filament) muscle Z-line, alpha 2	O	F-actin capping protein alpha-2 subunit|F-actin-capping protein subunit alpha-2|capZ alpha-2	20130505
9606	831	CAST	-	BS-17	HGNC:1515|MIM:114090|Ensembl:ENSG00000153113|HPRD:00233|Vega:OTTHUMG00000128413	5	5q15	calpastatin	protein-coding	CAST	calpastatin	O	calpain inhibitor|sperm BS-17 component	20130505
9606	832	CAPZB	RP4-657E11.7	CAPB|CAPPB|CAPZ	HGNC:1491|MIM:601572|Ensembl:ENSG00000077549|HPRD:11872|Vega:OTTHUMG00000002556	1	1p36.1	capping protein (actin filament) muscle Z-line, beta	protein-coding	CAPZB	capping protein (actin filament) muscle Z-line, beta	O	F-actin-capping protein subunit beta|capZ beta	20130505
9606	833	CARS	-	CARS1|CYSRS|MGC:11246	HGNC:1493|MIM:123859|Ensembl:ENSG00000110619|HPRD:00464|Vega:OTTHUMG00000010927	11	11p15.5	cysteinyl-tRNA synthetase	protein-coding	CARS	cysteinyl-tRNA synthetase	O	cysteine tRNA ligase 1, cytoplasmic|cysteine translase|cysteine--tRNA ligase, cytoplasmic	20130505
9606	834	CASP1	-	ICE|IL1BC|P45	HGNC:1499|MIM:147678|Ensembl:ENSG00000137752|HPRD:00977|Vega:OTTHUMG00000048072	11	11q23	caspase 1, apoptosis-related cysteine peptidase	protein-coding	CASP1	caspase 1, apoptosis-related cysteine peptidase	O	CASP1 nirs variant 1|IL-1 beta-converting enzyme|IL1B-convertase|caspase 1, apoptosis-related cysteine peptidase (interleukin 1, beta, convertase)|caspase-1|interleukin 1, beta, convertase|interleukin 1-B converting enzyme	20130505
9606	835	CASP2	-	CASP-2|ICH1|NEDD-2|NEDD2|PPP1R57	HGNC:1503|MIM:600639|Ensembl:ENSG00000106144|HPRD:02800|Vega:OTTHUMG00000023641	7	7q34-q35	caspase 2, apoptosis-related cysteine peptidase	protein-coding	CASP2	caspase 2, apoptosis-related cysteine peptidase	O	caspase-2|neural precursor cell expressed developmentally down-regulated protein 2|protease ICH-1|protein phosphatase 1, regulatory subunit 57	20130505
9606	836	CASP3	-	CPP32|CPP32B|SCA-1	HGNC:1504|MIM:600636|Ensembl:ENSG00000164305|HPRD:02799|Vega:OTTHUMG00000133681	4	4q34	caspase 3, apoptosis-related cysteine peptidase	protein-coding	CASP3	caspase 3, apoptosis-related cysteine peptidase	O	CASP-3|CPP-32|PARP cleavage protease|SREBP cleavage activity 1|apopain|caspase 3, apoptosis-related cysteine protease|caspase-3|cysteine protease CPP32|procaspase3|protein Yama	20130512
9606	837	CASP4	-	ICE(rel)II|ICEREL-II|ICH-2|Mih1/TX|TX	HGNC:1505|MIM:602664|Ensembl:ENSG00000196954|HPRD:04047|Vega:OTTHUMG00000166078	11	11q22.2-q22.3	caspase 4, apoptosis-related cysteine peptidase	protein-coding	CASP4	caspase 4, apoptosis-related cysteine peptidase	O	CASP-4|ICE(rel)-II|apoptotic cysteine protease Mih1/TX|caspase 4, apoptosis-related cysteine protease|caspase-4|protease ICH-2|protease TX	20130505
9606	838	CASP5	-	ICE(rel)III|ICEREL-III|ICH-3	HGNC:1506|MIM:602665|Ensembl:ENSG00000137757|HPRD:04048|Vega:OTTHUMG00000048073	11	11q22.2-q22.3	caspase 5, apoptosis-related cysteine peptidase	protein-coding	CASP5	caspase 5, apoptosis-related cysteine peptidase	O	CASP-5|ICE(rel)-III|TY protease|caspase 5, apoptosis-related cysteine protease|caspase-5|protease ICH-3|protease TY	20130505
9606	839	CASP6	-	MCH2	HGNC:1507|MIM:601532|Ensembl:ENSG00000138794|HPRD:03321|Vega:OTTHUMG00000131914	4	4q25	caspase 6, apoptosis-related cysteine peptidase	protein-coding	CASP6	caspase 6, apoptosis-related cysteine peptidase	O	apoptotic protease MCH-2|caspase 6, apoptosis-related cysteine protease|caspase-6	20130505
9606	840	CASP7	RP11-211N11.6	CASP-7|CMH-1|ICE-LAP3|LICE2|MCH3	HGNC:1508|MIM:601761|Ensembl:ENSG00000165806|HPRD:03457|Vega:OTTHUMG00000019076	10	10q25	caspase 7, apoptosis-related cysteine peptidase	protein-coding	CASP7	caspase 7, apoptosis-related cysteine peptidase	O	ICE-like apoptotic protease 3|apoptotic protease MCH-3|caspase 7, apoptosis-related cysteine protease|caspase-7	20130505
9606	841	CASP8	-	ALPS2B|CAP4|Casp-8|FLICE|MACH|MCH5	HGNC:1509|MIM:601763|Ensembl:ENSG00000064012|HPRD:03459|Vega:OTTHUMG00000132821	2	2q33-q34	caspase 8, apoptosis-related cysteine peptidase	protein-coding	CASP8	caspase 8, apoptosis-related cysteine peptidase	O	FADD-homologous ICE/CED-3-like protease|FADD-like ICE|ICE-like apoptotic protease 5|MACH-alpha-1/2/3 protein|MACH-beta-1/2/3/4 protein|MORT1-associated ced-3 homolog|apoptotic cysteine protease|apoptotic protease Mch-5|caspase 8, apoptosis-related cysteine protease|caspase-8	20130505
9606	842	CASP9	RP11-265F14.3	APAF-3|APAF3|ICE-LAP6|MCH6|PPP1R56	HGNC:1511|MIM:602234|Ensembl:ENSG00000132906|HPRD:03756|Vega:OTTHUMG00000002256	1	1p36.21	caspase 9, apoptosis-related cysteine peptidase	protein-coding	CASP9	caspase 9, apoptosis-related cysteine peptidase	O	ICE-like apoptotic protease 6|apoptotic protease MCH-6|apoptotic protease activating factor 3|caspase-9|protein phosphatase 1, regulatory subunit 56	20130512
9606	843	CASP10	-	ALPS2|FLICE2|MCH4	HGNC:1500|MIM:601762|Ensembl:ENSG00000003400|HPRD:03458|Vega:OTTHUMG00000132818	2	2q33-q34	caspase 10, apoptosis-related cysteine peptidase	protein-coding	CASP10	caspase 10, apoptosis-related cysteine peptidase	O	CASP-10|FADD-like ICE2|FAS-associated death domain protein interleukin-1B-converting enzyme 2|ICE-like apoptotic protease 4|apoptotic protease MCH-4|caspase 10, apoptosis-related cysteine protease|caspase-10|interleukin-1B-converting enzyme 2	20130505
9606	844	CASQ1	RP11-536C5.6	CASQ|PDIB1	HGNC:1512|MIM:114250|Ensembl:ENSG00000143318|HPRD:15915|Vega:OTTHUMG00000031607	1	1q21	calsequestrin 1 (fast-twitch, skeletal muscle)	protein-coding	CASQ1	calsequestrin 1 (fast-twitch, skeletal muscle)	O	calmitin|calmitine|calsequestrin, skeletal muscle isoform|calsequestrin-1	20130416
9606	845	CASQ2	-	PDIB2	HGNC:1513|MIM:114251|Ensembl:ENSG00000118729|HPRD:00256|Vega:OTTHUMG00000011970	1	1p13.1	calsequestrin 2 (cardiac muscle)	protein-coding	CASQ2	calsequestrin 2 (cardiac muscle)	O	calsequestrin 2, fast-twitch, cardiac muscle|calsequestrin, cardiac muscle isoform|calsequestrin-2	20130505
9606	846	CASR	-	CAR|EIG8|FHH|FIH|GPRC2A|HHC|HHC1|NSHPT|PCAR1	HGNC:1514|MIM:601199|Ensembl:ENSG00000036828|HPRD:03122|Vega:OTTHUMG00000159491	3	3q13	calcium-sensing receptor	protein-coding	CASR	calcium-sensing receptor	O	extracellular calcium-sensing receptor|parathyroid Ca(2+)-sensing receptor 1|parathyroid cell calcium-sensing receptor	20130505
9606	847	CAT	-	-	HGNC:1516|MIM:115500|Ensembl:ENSG00000121691|HPRD:00282|Vega:OTTHUMG00000044353	11	11p13	catalase	protein-coding	CAT	catalase	O	-	20130505
9606	856	CATR1	-	-	HGNC:1525|MIM:600676	7	7q32	CATR tumorigenicity conversion 1	unknown	CATR1	CATR tumorigenicity conversion 1	O	-	20130226
9606	857	CAV1	-	BSCL3|CGL3|MSTP085|VIP21	HGNC:1527|MIM:601047|Ensembl:ENSG00000105974|HPRD:03028|Vega:OTTHUMG00000023413	7	7q31.1	caveolin 1, caveolae protein, 22kDa	protein-coding	CAV1	caveolin 1, caveolae protein, 22kDa	O	caveolin-1|cell growth-inhibiting protein 32	20130512
9606	858	CAV2	-	CAV	HGNC:1528|MIM:601048|Ensembl:ENSG00000105971|HPRD:03029|Vega:OTTHUMG00000023414	7	7q31.1	caveolin 2	protein-coding	CAV2	caveolin 2	O	caveolae protein, 20-kD|caveolin 2 isoform a and b|caveolin-2	20130512
9606	859	CAV3	-	LGMD1C|LQT9|VIP-21|VIP21	HGNC:1529|MIM:601253|Ensembl:ENSG00000182533|HPRD:03154|Vega:OTTHUMG00000090519	3	3p25	caveolin 3	protein-coding	CAV3	caveolin 3	O	M-caveolin|caveolin-3	20130505
9606	860	RUNX2	RP1-166H4.1	AML3|CBFA1|CCD|CCD1|CLCD|OSF-2|OSF2|PEA2aA|PEBP2A1|PEBP2A2|PEBP2aA|PEBP2aA1	HGNC:10472|MIM:600211|Ensembl:ENSG00000124813|HPRD:02566|Vega:OTTHUMG00000014774	6	6p21	runt-related transcription factor 2	protein-coding	RUNX2	runt-related transcription factor 2	O	CBF-alpha-1|PEA2-alpha A|PEBP2-alpha A|SL3-3 enhancer factor 1 alpha A subunit|SL3/AKV core-binding factor alpha A subunit|acute myeloid leukemia 3 protein|core-binding factor, runt domain, alpha subunit 1|oncogene AML-3|osteoblast-specific transcription factor 2|polyomavirus enhancer-binding protein 2 alpha A subunit	20130505
9606	861	RUNX1	-	AML1|AML1-EVI-1|AMLCR1|CBFA2|EVI-1|PEBP2aB	HGNC:10471|MIM:151385|Ensembl:ENSG00000159216|HPRD:01043|Vega:OTTHUMG00000086299	21	21q22.3	runt-related transcription factor 1	protein-coding	RUNX1	runt-related transcription factor 1	O	AML1-EVI-1 fusion protein|CBF-alpha-2|PEA2-alpha B|PEBP2-alpha B|SL3-3 enhancer factor 1 alpha B subunit|SL3/AKV core-binding factor alpha B subunit|acute myeloid leukemia 1 protein|core-binding factor, runt domain, alpha subunit 2|oncogene AML-1|polyomavirus enhancer-binding protein 2 alpha B subunit	20130505
9606	862	RUNX1T1	-	AML1T1|CBFA2T1|CDR|ETO|MTG8|ZMYND2	HGNC:1535|MIM:133435|Ensembl:ENSG00000079102|HPRD:00590|Vega:OTTHUMG00000164066	8	8q22	runt-related transcription factor 1; translocated to, 1 (cyclin D-related)	protein-coding	RUNX1T1	runt-related transcription factor 1; translocated to, 1 (cyclin D-related)	O	acute myelogenous leukemia 1 translocation 1, cyclin-D related|core-binding factor, runt domain, alpha subunit 2; translocated to, 1; cyclin D-related|eight twenty one protein|myeloid translocation gene on 8q22|protein CBFA2T1|zinc finger MYND domain-containing protein 2	20130505
9606	863	CBFA2T3	-	ETO2|MTG16|MTGR2|ZMYND4	HGNC:1537|MIM:603870|Ensembl:ENSG00000129993|HPRD:04847|Vega:OTTHUMG00000137864	16	16q24	core-binding factor, runt domain, alpha subunit 2; translocated to, 3	protein-coding	CBFA2T3	core-binding factor, runt domain, alpha subunit 2; translocated to, 3	O	MTG8-related gene 2|MTG8-related protein 2|myeloid translocation gene 8 and 16b|myeloid translocation gene on chromosome 16 protein|protein CBFA2T3|zinc finger MYND domain-containing protein 4	20130505
9606	864	RUNX3	RP3-398I9.1	AML2|CBFA3|PEBP2aC	HGNC:10473|MIM:600210|Ensembl:ENSG00000020633|HPRD:02565|Vega:OTTHUMG00000003316	1	1p36	runt-related transcription factor 3	protein-coding	RUNX3	runt-related transcription factor 3	O	CBF-alpha-3|PEA2 alpha C|PEA2-alpha C|PEBP2 alpha C|PEBP2-alpha C|SL3-3 enhancer factor 1 alpha C subunit|SL3/AKV core-binding factor alpha C subunit|acute myeloid leukemia 2 protein|acute myeloid leukemia gene 2|core-binding factor subunit alpha-3|core-binding factor, runt domain, alpha subunit 3|oncogene AML-2|polyomavirus enhancer-binding protein 2 alpha C subunit|transcription factor AML2	20130505
9606	865	CBFB	-	PEBP2B	HGNC:1539|MIM:121360|Ensembl:ENSG00000067955|HPRD:00418|Vega:OTTHUMG00000137520	16	16q22.1	core-binding factor, beta subunit	protein-coding	CBFB	core-binding factor, beta subunit	O	CBF-beta|PEA2-beta|PEBP2-beta|SL3-3 enhancer factor 1 beta subunit|SL3-3 enhancer factor 1 subunit beta|SL3/AKV core-binding factor beta subunit|core-binding factor subunit beta|polyomavirus enhancer binding protein 2, beta subunit|polyomavirus enhancer-binding protein 2 beta subunit	20130505
9606	866	SERPINA6	-	CBG	HGNC:1540|MIM:122500|Ensembl:ENSG00000170099|HPRD:00419|Vega:OTTHUMG00000171346	14	14q32.1	serpin peptidase inhibitor, clade A (alpha-1 antiproteinase, antitrypsin), member 6	protein-coding	SERPINA6	serpin peptidase inhibitor, clade A (alpha-1 antiproteinase, antitrypsin), member 6	O	corticosteroid binding globulin|corticosteroid-binding globulin|serine (or cysteine) proteinase inhibitor, clade A (alpha-1 antiproteinase, antitrypsin), member 6|serpin A6|transcortin	20130428
9606	867	CBL	-	C-CBL|CBL2|FRA11B|NSLL|RNF55	HGNC:1541|MIM:165360|Ensembl:ENSG00000110395|HPRD:01320|Vega:OTTHUMG00000166170	11	11q23.3	Cbl proto-oncogene, E3 ubiquitin protein ligase	protein-coding	CBL	Cbl proto-oncogene, E3 ubiquitin protein ligase	O	Cas-Br-M (murine) ecotropic retroviral transforming sequence|E3 ubiquitin-protein ligase CBL|RING finger protein 55|casitas B-lineage lymphoma proto-oncogene|fragile site, folic acid type, rare, fra(11)(q23.3)|oncogene CBL2|proto-oncogene c-Cbl|signal transduction protein CBL	20130512
9606	868	CBLB	Nbla00127	Cbl-b|RNF56	HGNC:1542|MIM:604491|Ensembl:ENSG00000114423|HPRD:05136	3	3q13.11	Cbl proto-oncogene, E3 ubiquitin protein ligase B	protein-coding	CBLB	Cbl proto-oncogene, E3 ubiquitin protein ligase B	O	Cas-Br-M (murine) ecotropic retroviral transforming sequence b|Cas-Br-M (murine) ectropic retroviral transforming sequence b|E3 ubiquitin-protein ligase CBL-B|RING finger protein 56|SH3-binding protein CBL-B|casitas B-lineage lymphoma proto-oncogene b|signal transduction protein CBL-B	20130505
9606	869	CBLN1	-	-	HGNC:1543|MIM:600432|HPRD:02697	16	16q12.1	cerebellin 1 precursor	protein-coding	CBLN1	cerebellin 1 precursor	O	cerebellin-1|precerebellin	20130416
9606	871	SERPINH1	PIG14	AsTP3|CBP1|CBP2|HSP47|OI10|PPROM|RA-A47|SERPINH2|gp46	HGNC:1546|MIM:600943|Ensembl:ENSG00000149257|HPRD:02968|Vega:OTTHUMG00000165362	11	11q13.5	serpin peptidase inhibitor, clade H (heat shock protein 47), member 1, (collagen binding protein 1)	protein-coding	SERPINH1	serpin peptidase inhibitor, clade H (heat shock protein 47), member 1, (collagen binding protein 1)	O	47 kDa heat shock protein|arsenic-transactivated protein 3|cell proliferation-inducing gene 14 protein|colligin-1|colligin-2|rheumatoid arthritis antigen A-47|rheumatoid arthritis-related antigen RA-A47|serine (or cysteine) proteinase inhibitor, clade H (heat shock protein 47), member 1, (collagen binding protein 1)|serine (or cysteine) proteinase inhibitor, clade H (heat shock protein 47), membe…	20130512
9606	873	CBR1	-	CBR|SDR21C1|hCBR1	HGNC:1548|MIM:114830|Ensembl:ENSG00000159228|HPRD:00267|Vega:OTTHUMG00000086618	21	21q22.13	carbonyl reductase 1	protein-coding	CBR1	carbonyl reductase 1	O	15-hydroxyprostaglandin dehydrogenase|NADPH-dependent carbonyl reductase 1|carbonyl reductase (NADPH) 1|carbonyl reductase [NADPH] 1|prostaglandin 9-ketoreductase|prostaglandin-E(2) 9-reductase|short chain dehydrogenase/reductase family 21C, member 1	20130512
9606	874	CBR3	-	SDR21C2|hCBR3	HGNC:1549|MIM:603608|Ensembl:ENSG00000159231|HPRD:07222|Vega:OTTHUMG00000086617	21	21q22.2	carbonyl reductase 3	protein-coding	CBR3	carbonyl reductase 3	O	NADPH-dependent carbonyl reductase 3|carbonyl reductase (NADPH) 3|carbonyl reductase [NADPH] 3|short chain dehydrogenase/reductase family 21C, member 2	20130512
9606	875	CBS	-	HIP4	HGNC:1550|MIM:613381|Ensembl:ENSG00000160200|HPRD:01994|Vega:OTTHUMG00000086834	21	21q22.3	cystathionine-beta-synthase	protein-coding	CBS	cystathionine-beta-synthase	O	beta-thionase|cystathionine beta-synthase|methylcysteine synthase|serine sulfhydrase	20130512
9606	878	CCA1	-	-	HGNC:1559|MIM:115660	17	17q24	cataract, congenital, cerulean type, 1	unknown	CCA1	cataract, congenital, cerulean type, 1	O	-	20130226
9606	881	CCIN	RP11-421H8.4	BTBD20	HGNC:1568|MIM:603960|Ensembl:ENSG00000185972|HPRD:04907|Vega:OTTHUMG00000019901	9	9p13.3	calicin	protein-coding	CCIN	calicin	O	-	20130505
9606	882	CCAL1	-	CPDD	HGNC:1561|MIM:600668	8	8q	chondrocalcinosis 1 (calcium pyrophosphate-deposition disease, early onset osteoarthritis)	unknown	CCAL1	chondrocalcinosis 1 (calcium pyrophosphate-deposition disease, early onset osteoarthritis)	O	-	20130226
9606	883	CCBL1	RP11-545E17.6	GTK|KAT1|KATI	HGNC:1564|MIM:600547|Ensembl:ENSG00000171097|HPRD:02769|Vega:OTTHUMG00000020767	9	9q34.11	cysteine conjugate-beta lyase, cytoplasmic	protein-coding	CCBL1	cysteine conjugate-beta lyase, cytoplasmic	O	beta-lysase, kidney|cysteine conjugate-beta lyase; cytoplasmic (glutamine transaminase K, kyneurenine aminotransferase)|cysteine-S-conjugate beta-lyase|glutamine transaminase K|glutamine--phenylpyruvate transaminase|glutamine-phenylpyruvate aminotransferase|kyneurenine aminotransferase|kynurenine aminotransferase I|kynurenine--oxoglutarate transaminase 1|kynurenine--oxoglutarate transaminase I	20130505
9606	885	CCK	-	-	HGNC:1569|MIM:118440|Ensembl:ENSG00000187094|HPRD:00321|Vega:OTTHUMG00000131796	3	3p22.1	cholecystokinin	protein-coding	CCK	cholecystokinin	O	cholecystokinin triacontatriapeptide|prepro-cholecystokinin	20130505
9606	886	CCKAR	-	CCK-A|CCK1-R|CCKRA	HGNC:1570|MIM:118444|Ensembl:ENSG00000163394|HPRD:00322|Vega:OTTHUMG00000128567	4	4p15.1-p15.2	cholecystokinin A receptor	protein-coding	CCKAR	cholecystokinin A receptor	O	CCK-A receptor|CCK-AR|cholecystokinin receptor type A|cholecystokinin type-A receptor|cholecystokinin-1 receptor	20130505
9606	887	CCKBR	-	CCK-B|CCK2R|GASR	HGNC:1571|MIM:118445|Ensembl:ENSG00000110148|HPRD:00323|Vega:OTTHUMG00000133380	11	11p15.4	cholecystokinin B receptor	protein-coding	CCKBR	cholecystokinin B receptor	O	CCK-B receptor|CCK-BR|CCK2 receptor|CCK2-R|cholecystokinin-2 receptor|gastrin receptor|gastrin/cholecystokinin type B receptor	20130505
9606	889	KRIT1	-	CAM|CCM1	HGNC:1573|MIM:604214|Ensembl:ENSG00000001631|HPRD:05020|Vega:OTTHUMG00000131187	7	7q21.2	KRIT1, ankyrin repeat containing	protein-coding	KRIT1	KRIT1, ankyrin repeat containing	O	ankyrin repeat-containing protein Krit1|cerebral cavernous malformations 1 protein|krev interaction trapped 1|krev interaction trapped protein 1	20130505
9606	890	CCNA2	-	CCN1|CCNA	HGNC:1578|MIM:123835|Ensembl:ENSG00000145386|HPRD:00453|Vega:OTTHUMG00000133072	4	4q27	cyclin A2	protein-coding	CCNA2	cyclin A2	O	cyclin-A|cyclin-A2	20130505
9606	891	CCNB1	-	CCNB	HGNC:1579|MIM:123836|Ensembl:ENSG00000134057|HPRD:00454|Vega:OTTHUMG00000097817	5	5q12	cyclin B1	protein-coding	CCNB1	cyclin B1	O	G2/mitotic-specific cyclin B1|G2/mitotic-specific cyclin-B1	20130505
9606	892	CCNC	RP1-199J3.1	CycC	HGNC:1581|MIM:123838|Ensembl:ENSG00000112237|HPRD:00456|Vega:OTTHUMG00000015268	6	6q21	cyclin C	protein-coding	CCNC	cyclin C	O	SRB11 homolog|cyclin-C|hSRB11	20130505
9606	894	CCND2	-	KIAK0002	HGNC:1583|MIM:123833|Ensembl:ENSG00000118971|HPRD:00451|Vega:OTTHUMG00000168123	12	12p13	cyclin D2	protein-coding	CCND2	cyclin D2	O	G1/S-specific cyclin D2|G1/S-specific cyclin-D2	20130505
9606	895	CCND2P	-	-	HGNC:1584	11	11q13	cyclin D2 pseudogene	pseudo	CCND2P	cyclin D2 pseudogene	O	-	20130226
9606	896	CCND3	RP5-973N23.3	-	HGNC:1585|MIM:123834|Ensembl:ENSG00000112576|HPRD:00452|Vega:OTTHUMG00000014690	6	6p21	cyclin D3	protein-coding	CCND3	cyclin D3	O	D3-type cyclin|G1/S-specific cyclin D3|G1/S-specific cyclin-D3	20130505
9606	897	CCND3P	-	-	HGNC:1586	10	10p11.23	cyclin D3 pseudogene	pseudo	CCND3P	cyclin D3 pseudogene	O	-	20130226
9606	898	CCNE1	-	CCNE	HGNC:1589|MIM:123837|Ensembl:ENSG00000105173|HPRD:00455|Vega:OTTHUMG00000177626	19	19q12	cyclin E1	protein-coding	CCNE1	cyclin E1	O	G1/S-specific cyclin-E1|cyclin Es|cyclin Et	20130505
9606	899	CCNF	-	FBX1|FBXO1	HGNC:1591|MIM:600227|Ensembl:ENSG00000162063|HPRD:02574|Vega:OTTHUMG00000128858	16	16p13.3	cyclin F	protein-coding	CCNF	cyclin F	O	F-box only protein 1|G2/mitotic-specific cyclin-F|cyclin-F	20130505
9606	900	CCNG1	-	CCNG	HGNC:1592|MIM:601578|Ensembl:ENSG00000113328|HPRD:03345|Vega:OTTHUMG00000130380	5	5q32-q34	cyclin G1	protein-coding	CCNG1	cyclin G1	O	cyclin-G|cyclin-G1	20130505
9606	901	CCNG2	-	-	HGNC:1593|MIM:603203|Ensembl:ENSG00000138764|HPRD:04438|Vega:OTTHUMG00000130100	4	4q21.1	cyclin G2	protein-coding	CCNG2	cyclin G2	O	cyclin-G2	20130505
9606	902	CCNH	-	CAK|p34|p37	HGNC:1594|MIM:601953|Ensembl:ENSG00000134480|HPRD:09059|Vega:OTTHUMG00000119077	5	5q13.3-q14	cyclin H	protein-coding	CCNH	cyclin H	O	CAK complex subunit|CDK-activating kinase complex subunit|MO15-associated protein|cyclin-H|cyclin-dependent kinase-activating kinase complex subunit	20130505
9606	904	CCNT1	-	CCNT|CYCT1|HIVE1	HGNC:1599|MIM:143055|Ensembl:ENSG00000129315|HPRD:03938|Vega:OTTHUMG00000170393	12	12q13.11	cyclin T1	protein-coding	CCNT1	cyclin T1	O	CDK9-associated C-type protein|cyclin C-related protein|cyclin-T1|human immunodeficiency virus type 1 (HIV-1) expression (elevated) 1	20130508
9606	905	CCNT2	-	CYCT2	HGNC:1600|MIM:603862|Ensembl:ENSG00000082258|HPRD:04839|Vega:OTTHUMG00000131712	2	2q21.3	cyclin T2	protein-coding	CCNT2	cyclin T2	O	SDS-stable vimentin-bound DNA fragment HEF42VIM22|cyclin T2a|cyclin T2b|cyclin-T2|subunit of positive elongation transcription factor b	20130505
9606	907	CCT	-	-	HGNC:1614|MIM:302200	X	-	cataract, congenital, total	unknown	CCT	cataract, congenital, total	O	-	20130226
9606	908	CCT6A	-	CCT-zeta|CCT-zeta-1|CCT6|Cctz|HTR3|MoDP-2|TCP-1-zeta|TCP20|TCPZ|TTCP20	HGNC:1620|MIM:104613|Ensembl:ENSG00000146731|HPRD:00089|Vega:OTTHUMG00000022842	7	7p11.2	chaperonin containing TCP1, subunit 6A (zeta 1)	protein-coding	CCT6A	chaperonin containing TCP1, subunit 6A (zeta 1)	O	T-complex protein 1 subunit zeta|T-complex protein 1, zeta subunit|acute morphine dependence related protein 2|acute morphine dependence-related protein 2|amino acid transport defect-complementing|chaperonin containing T-complex subunit 6|histidine transport regulator 3	20130505
9606	909	CD1A	-	CD1|FCB6|HTA1|R4|T6	HGNC:1634|MIM:188370|Ensembl:ENSG00000158477|HPRD:01776|Vega:OTTHUMG00000017512	1	1q22-q23	CD1a molecule	protein-coding	CD1A	CD1a molecule	O	CD1A antigen, a polypeptide|T-cell surface antigen T6/Leu-6|T-cell surface glycoprotein CD1a|cluster of differentiation 1 A|cortical thymocyte antigen CD1A|differentiation antigen CD1-alpha-3|epidermal dendritic cell marker CD1a|hTa1 thymocyte antigen	20130505
9606	910	CD1B	RP11-101J8.4	CD1|CD1A|R1	HGNC:1635|MIM:188360|Ensembl:ENSG00000158485|HPRD:01775|Vega:OTTHUMG00000017513	1	1q22-q23	CD1b molecule	protein-coding	CD1B	CD1b molecule	O	CD1B antigen, b polypeptide|T-cell surface glycoprotein CD1b|cortical thymocyte antigen CD1B|differentiation antigen CD1-alpha-3	20130505
9606	911	CD1C	RP11-101J8.3	BDCA1|CD1|CD1A|R7	HGNC:1636|MIM:188340|HPRD:01772	1	1q22-q23	CD1c molecule	protein-coding	CD1C	CD1c molecule	O	CD1C antigen, c polypeptide|T-cell surface glycoprotein CD1c|cortical thymocyte antigen CD1C|differentiation antigen CD1-alpha-3	20130414
9606	912	CD1D	-	CD1A|R3	HGNC:1637|MIM:188410|HPRD:01780	1	1q22-q23	CD1d molecule	protein-coding	CD1D	CD1d molecule	O	CD1D antigen, d polypeptide|HMC class I antigen-like glycoprotein CD1D|R3G1|T-cell surface glycoprotein CD1d|antigen-presenting glycoprotein CD1d|differentiation antigen CD1-alpha-3|thymocyte antigen CD1D	20130512
9606	913	CD1E	RP11-101J8.5	CD1A|R2	HGNC:1638|MIM:188411|Ensembl:ENSG00000158488|HPRD:01781|Vega:OTTHUMG00000017515	1	1q22-q23	CD1e molecule	protein-coding	CD1E	CD1e molecule	O	CD1E antigen, e polypeptide|R2G1|T-cell surface glycoprotein CD1e, membrane-associated|differentiation antigen CD1-alpha-3|hCD1e|leukocyte differentiation antigen|thymocyte antigen CD1E	20130505
9606	914	CD2	RP4-655N15.2	LFA-2|SRBC|T11	HGNC:1639|MIM:186990|Ensembl:ENSG00000116824|HPRD:01750|Vega:OTTHUMG00000022750	1	1p13.1	CD2 molecule	protein-coding	CD2	CD2 molecule	O	CD2 antigen (p50), sheep red blood cell receptor|LFA-3 receptor|T-cell surface antigen CD2|T-cell surface antigen T11/Leu-5|erythrocyte receptor|lymphocyte-function antigen-2|rosette receptor	20130505
9606	915	CD3D	-	CD3-DELTA|T3D	HGNC:1673|MIM:186790|Ensembl:ENSG00000167286|HPRD:01730|Vega:OTTHUMG00000166970	11	11q23	CD3d molecule, delta (CD3-TCR complex)	protein-coding	CD3D	CD3d molecule, delta (CD3-TCR complex)	O	CD3 antigen, delta subunit|CD3 delta|CD3d antigen, delta polypeptide (TiT3 complex)|OKT3, delta chain|T-cell receptor T3 delta chain|T-cell surface glycoprotein CD3 delta chain	20130505
9606	916	CD3E	-	T3E|TCRE	HGNC:1674|MIM:186830|Ensembl:ENSG00000198851|HPRD:08923|Vega:OTTHUMG00000166968	11	11q23	CD3e molecule, epsilon (CD3-TCR complex)	protein-coding	CD3E	CD3e molecule, epsilon (CD3-TCR complex)	O	CD3-epsilon|CD3e antigen, epsilon polypeptide (TiT3 complex)|T-cell antigen receptor complex, epsilon subunit of T3|T-cell surface antigen T3/Leu-4 epsilon chain|T-cell surface glycoprotein CD3 epsilon chain	20130505
9606	917	CD3G	-	CD3-GAMMA|T3G	HGNC:1675|MIM:186740|HPRD:07037	11	11q23	CD3g molecule, gamma (CD3-TCR complex)	protein-coding	CD3G	CD3g molecule, gamma (CD3-TCR complex)	O	CD3g antigen, gamma polypeptide (TiT3 complex)|CD3g molecule, epsilon (CD3-TCR complex)|T-cell antigen receptor complex, gamma subunit of T3|T-cell receptor T3 gamma chain|T-cell surface glycoprotein CD3 gamma chain	20130505
9606	919	CD247	RP11-104L21.1	CD3-ZETA|CD3H|CD3Q|CD3Z|T3Z|TCRZ	HGNC:1677|MIM:186780|Ensembl:ENSG00000198821|HPRD:01729|Vega:OTTHUMG00000034593	1	1q24.2	CD247 molecule	protein-coding	CD247	CD247 molecule	O	CD247 antigen, zeta subunit|CD3Z antigen, zeta polypeptide (TiT3 complex)|CD3zeta chain|T-cell antigen receptor complex, zeta subunit of CD3|T-cell receptor T3 zeta chain|T-cell surface glycoprotein CD3 zeta chain|TCR zeta chain	20130505
9606	920	CD4	-	CD4mut	HGNC:1678|MIM:186940|Ensembl:ENSG00000010610|HPRD:01740|Vega:OTTHUMG00000168514	12	12p13.31	CD4 molecule	protein-coding	CD4	CD4 molecule	O	CD4 antigen (p55)|CD4 receptor|T-cell surface antigen T4/Leu-3|T-cell surface glycoprotein CD4	20130505
9606	921	CD5	-	LEU1|T1	HGNC:1685|MIM:153340|Ensembl:ENSG00000110448|HPRD:01078|Vega:OTTHUMG00000167825	11	11q13	CD5 molecule	protein-coding	CD5	CD5 molecule	O	CD5 antigen (p56-62)|T-cell surface glycoprotein CD5|lymphocyte antigen T1/Leu-1	20130505
9606	922	CD5L	UNQ203/PRO229	AIM|API6|PRO229|SP-ALPHA|Spalpha	HGNC:1690|MIM:602592|Ensembl:ENSG00000073754|HPRD:03997|Vega:OTTHUMG00000022440	1	1q21-q23	CD5 molecule-like	protein-coding	CD5L	CD5 molecule-like	O	CD5 antigen-like|CD5 antigen-like (scavenger receptor cysteine rich family)|CT-2|apoptosis inhibitor 6|igM-associated peptide	20130226
9606	923	CD6	-	TP120	HGNC:1691|MIM:186720|Ensembl:ENSG00000013725|HPRD:01724|Vega:OTTHUMG00000167823	11	11q13	CD6 molecule	protein-coding	CD6	CD6 molecule	O	CD6 antigen|T-cell differentiation antigen CD6|T12	20130512
9606	924	CD7	-	GP40|LEU-9|TP41|Tp40	HGNC:1695|MIM:186820|Ensembl:ENSG00000173762|HPRD:01732|Vega:OTTHUMG00000178662	17	17q25.2-q25.3	CD7 molecule	protein-coding	CD7	CD7 molecule	O	CD7 antigen (p41)|T-cell antigen CD7|T-cell leukemia antigen|T-cell surface antigen Leu-9|p41 protein	20130505
9606	925	CD8A	-	CD8|Leu2|MAL|p32	HGNC:1706|MIM:186910|Ensembl:ENSG00000153563|HPRD:01737|Vega:OTTHUMG00000130265	2	2p12	CD8a molecule	protein-coding	CD8A	CD8a molecule	O	CD8 antigen, alpha polypeptide (p32)|Leu2 T-lymphocyte antigen|OKT8 T-cell antigen|T cell co-receptor|T-cell antigen Leu2|T-cell surface glycoprotein CD8 alpha chain|T-lymphocyte differentiation antigen T8/Leu-2|T8 T-cell antigen	20130505
9606	926	CD8B	-	CD8B1|LEU2|LY3|LYT3|P37	HGNC:1707|MIM:186730|Ensembl:ENSG00000172116|HPRD:01725|Vega:OTTHUMG00000130264	2	2p12	CD8b molecule	protein-coding	CD8B	CD8b molecule	O	CD8 antigen, beta polypeptide 1 (p37)|T lymphocyte surface glycoprotein beta chain|T-cell surface glycoprotein CD8 beta chain	20130505
9606	927	CD8BP	-	CD8B2	HGNC:1708	2	2q12.1	CD8b molecule pseudogene	pseudo	CD8BP	CD8b molecule pseudogene	O	-	20130226
9606	928	CD9	GIG2	BTCC-1|DRAP-27|MIC3|MRP-1|TSPAN-29|TSPAN29	HGNC:1709|MIM:143030|Ensembl:ENSG00000010278|HPRD:00880|Vega:OTTHUMG00000044400	12	12p13.3	CD9 molecule	protein-coding	CD9	CD9 molecule	O	5H9 antigen|BA-2/p24 antigen|CD9 antigen|CD9 antigen (p24)|cell growth-inhibiting gene 2 protein|leukocyte antigen MIC3|motility related protein-1|tetraspanin-29	20130505
9606	929	CD14	-	-	HGNC:1628|MIM:158120|Ensembl:ENSG00000170458|HPRD:01151|Vega:OTTHUMG00000129507	5	5q31.1	CD14 molecule	protein-coding	CD14	CD14 molecule	O	monocyte differentiation antigen CD14|myeloid cell-specific leucine-rich glycoprotein	20130505
9606	930	CD19	-	B4|CVID3	HGNC:1633|MIM:107265|Ensembl:ENSG00000177455|HPRD:00113|Vega:OTTHUMG00000097049	16	16p11.2	CD19 molecule	protein-coding	CD19	CD19 molecule	O	B-lymphocyte antigen CD19|B-lymphocyte surface antigen B4|T-cell surface antigen Leu-12|differentiation antigen CD19	20130505
9606	931	MS4A1	-	B1|Bp35|CD20|CVID5|LEU-16|MS4A2|S7	HGNC:7315|MIM:112210|Ensembl:ENSG00000156738|HPRD:00204|Vega:OTTHUMG00000167614	11	11q12	membrane-spanning 4-domains, subfamily A, member 1	protein-coding	MS4A1	membrane-spanning 4-domains, subfamily A, member 1	O	B-lymphocyte antigen CD20|B-lymphocyte cell-surface antigen B1|CD20 antigen|CD20 receptor|leukocyte surface antigen Leu-16	20130512
9606	932	MS4A3	-	CD20L|HTM4	HGNC:7317|MIM:606498|Ensembl:ENSG00000149516|HPRD:09403|Vega:OTTHUMG00000167380	11	11q12.1	membrane-spanning 4-domains, subfamily A, member 3 (hematopoietic cell-specific)	protein-coding	MS4A3	membrane-spanning 4-domains, subfamily A, member 3 (hematopoietic cell-specific)	O	CD20 antigen homolog|CD20 antigen-like protein|IgE receptor beta chain|IgE receptor beta subunit|hematopoietic cell 4 transmembrane protein|hematopoietic-specific transmembrane protein 4|membrane-spanning 4-domains subfamily A member 3	20130505
9606	933	CD22	-	SIGLEC-2|SIGLEC2	HGNC:1643|MIM:107266|Ensembl:ENSG00000012124|HPRD:00114|Vega:OTTHUMG00000183298	19	19q13.1	CD22 molecule	protein-coding	CD22	CD22 molecule	O	B-cell receptor CD22|B-lymphocyte cell adhesion molecule|BL-CAM|CD22 antigen|T-cell surface antigen Leu-14|sialic acid binding Ig-like lectin 2|sialic acid-binding Ig-like lectin 2	20130505
9606	935	CD24P1	-	CD24L1	HGNC:1646	1	1p36	CD24 molecule pseudogene 1	pseudo	CD24P1	CD24 molecule pseudogene 1	O	-	20130226
9606	936	CD24P2	-	CD24L2	HGNC:1647	15	15q21.3	CD24 molecule pseudogene 2	pseudo	CD24P2	CD24 molecule pseudogene 2	O	-	20130226
9606	937	CD24P3	-	CD24L3	HGNC:1648	20	20q11.21	CD24 molecule pseudogene 3	pseudo	CD24P3	CD24 molecule pseudogene 3	O	-	20130226
9606	938	CD24P4	-	CD24L4	HGNC:1649	Y	Yq11.222	CD24 molecule pseudogene 4	pseudo	CD24P4	CD24 molecule pseudogene 4	O	-	20130226
9606	939	CD27	-	S152|S152. LPFS2|T14|TNFRSF7|Tp55	HGNC:11922|MIM:186711|Ensembl:ENSG00000139193|HPRD:01723|Vega:OTTHUMG00000168316	12	12p13	CD27 molecule	protein-coding	CD27	CD27 molecule	O	CD27 antigen|CD27L receptor|T cell activation antigen S152|T-cell activation antigen CD27|tumor necrosis factor receptor superfamily, member 7	20130505
9606	940	CD28	-	Tp44	HGNC:1653|MIM:186760|HPRD:01727	2	2q33	CD28 molecule	protein-coding	CD28	CD28 molecule	O	CD28 antigen|T-cell-specific surface glycoprotein CD28	20130512
9606	941	CD80	-	B7|B7-1|B7.1|BB1|CD28LG|CD28LG1|LAB7	HGNC:1700|MIM:112203|Ensembl:ENSG00000121594|HPRD:00202|Vega:OTTHUMG00000159419	3	3q13.3-q21	CD80 molecule	protein-coding	CD80	CD80 molecule	O	B-lymphocyte activation antigen B7|CD80 antigen (CD28 antigen ligand 1, B7-1 antigen)|CTLA-4 counter-receptor B7.1|T-lymphocyte activation antigen CD80|activation B7-1 antigen|costimulatory factor CD80|costimulatory molecule variant IgV-CD80	20130505
9606	942	CD86	-	B7-2|B7.2|B70|CD28LG2|LAB72	HGNC:1705|MIM:601020|Ensembl:ENSG00000114013|HPRD:03011|Vega:OTTHUMG00000159482	3	3q21	CD86 molecule	protein-coding	CD86	CD86 molecule	O	B-lymphocyte activation antigen B7-2|BU63|CD86 antigen (CD28 antigen ligand 2, B7-2 antigen)|CTLA-4 counter-receptor B7.2|FUN-1|T-lymphocyte activation antigen CD86	20130505
9606	943	TNFRSF8	-	CD30|D1S166E|Ki-1	HGNC:11923|MIM:153243|Ensembl:ENSG00000120949|HPRD:01074|Vega:OTTHUMG00000001827	1	1p36	tumor necrosis factor receptor superfamily, member 8	protein-coding	TNFRSF8	tumor necrosis factor receptor superfamily, member 8	O	CD30L receptor|Ki-1 antigen|cytokine receptor CD30|lymphocyte activation antigen CD30|tumor necrosis factor receptor superfamily member 8	20130512
9606	944	TNFSF8	-	CD153|CD30L|CD30LG	HGNC:11938|MIM:603875|HPRD:04852	9	9q33	tumor necrosis factor (ligand) superfamily, member 8	protein-coding	TNFSF8	tumor necrosis factor (ligand) superfamily, member 8	O	CD153 antigen|CD30 antigen ligand|CD30 ligand|CD30-L|tumor necrosis factor ligand superfamily member 8	20130505
9606	945	CD33	-	SIGLEC-3|SIGLEC3|p67	HGNC:1659|MIM:159590|Ensembl:ENSG00000105383|HPRD:01165|Vega:OTTHUMG00000182891	19	19q13.3	CD33 molecule	protein-coding	CD33	CD33 molecule	O	CD33 antigen (gp67)|gp67|myeloid cell surface antigen CD33|sialic acid binding Ig-like lectin 3|sialic acid-binding Ig-like lectin 3	20130505
9606	946	SIGLEC6	-	CD327|CD33L|CD33L1|CD33L2|CDW327|OBBP1	HGNC:10875|MIM:604405|Ensembl:ENSG00000105492|HPRD:16058|Vega:OTTHUMG00000133571	19	19q13.3	sialic acid binding Ig-like lectin 6	protein-coding	SIGLEC6	sialic acid binding Ig-like lectin 6	O	CD33 antigen-like 1|obesity-binding protein 1|sialic acid-binding Ig-like lectin 6	20130430
9606	947	CD34	RP11-328D5.2	-	HGNC:1662|MIM:142230|Ensembl:ENSG00000174059|HPRD:00790|Vega:OTTHUMG00000036565	1	1q32	CD34 molecule	protein-coding	CD34	CD34 molecule	O	CD34 antigen|hematopoietic progenitor cell antigen CD34	20130505
9606	948	CD36	-	BDPLT10|CHDS7|FAT|GP3B|GP4|GPIV|PASIV|SCARB3	HGNC:1663|MIM:173510|Ensembl:ENSG00000135218|HPRD:01430|Vega:OTTHUMG00000155383	7	7q11.2	CD36 molecule (thrombospondin receptor)	protein-coding	CD36	CD36 molecule (thrombospondin receptor)	O	CD36 antigen (collagen type I receptor, thrombospondin receptor)|GPIIIB|PAS IV|PAS-4 protein|cluster determinant 36|fatty acid translocase|glycoprotein IIIb|leukocyte differentiation antigen CD36|platelet glycoprotein 4|platelet glycoprotein IV|scavenger receptor class B, member 3	20130512
9606	949	SCARB1	-	CD36L1|CLA-1|CLA1|HDLQTL6|SR-BI|SRB1	HGNC:1664|MIM:601040|Ensembl:ENSG00000073060|HPRD:03024|Vega:OTTHUMG00000168544	12	12q24.31	scavenger receptor class B, member 1	protein-coding	SCARB1	scavenger receptor class B, member 1	O	CD36 and LIMPII analogous 1|CD36 antigen (collagen type I receptor, thrombospondin receptor)-like 1|scavenger receptor class B member 1|scavenger receptor class B type III	20130512
9606	950	SCARB2	-	AMRF|CD36L2|EPM4|HLGP85|LGP85|LIMP-2|LIMPII|SR-BII	HGNC:1665|MIM:602257|Ensembl:ENSG00000138760|HPRD:03772|Vega:OTTHUMG00000130099	4	4q21.1	scavenger receptor class B, member 2	protein-coding	SCARB2	scavenger receptor class B, member 2	O	85 kDa lysosomal membrane sialoglycoprotein|85 kDa lysosomal sialoglycoprotein scavenger receptor class B, member 2|CD36 antigen (collagen type I receptor, thrombospondin receptor)-like 2 (lysosomal integral membrane protein II)|CD36 antigen-like 2|LIMP II|lysosome membrane protein 2|lysosome membrane protein II	20130512
9606	951	CD37	-	GP52-40|TSPAN26	HGNC:1666|MIM:151523|Ensembl:ENSG00000104894|HPRD:01053|Vega:OTTHUMG00000183183	19	19q13.3	CD37 molecule	protein-coding	CD37	CD37 molecule	O	CD37 antigen|cell differentiation antigen 37|leukocyte antigen CD37|leukocyte surface antigen CD37|tetraspanin-26|tspan-26	20130226
9606	952	CD38	-	T10	HGNC:1667|MIM:107270|HPRD:00116	4	4p15	CD38 molecule	protein-coding	CD38	CD38 molecule	O	ADP-ribosyl cyclase 1|ADP-ribosyl cyclase/cyclic ADP-ribose hydrolase|CD38 antigen (p45)|NAD(+) nucleosidase|cADPr hydrolase 1|cyclic ADP-ribose hydrolase 1	20130512
9606	953	ENTPD1	-	ATPDase|CD39|NTPDase-1	HGNC:3363|MIM:601752|Ensembl:ENSG00000138185|HPRD:09047	10	10q24	ectonucleoside triphosphate diphosphohydrolase 1	protein-coding	ENTPD1	ectonucleoside triphosphate diphosphohydrolase 1	O	CD39 antigen|NTPDase 1|ecto-ATP diphosphohydrolase 1|ecto-ATPDase 1|ecto-ATPase 1|ecto-apyrase|lymphoid cell activation antigen	20130504
9606	954	ENTPD2	RP11-229P13.11-001	CD39L1|NTPDase-2	HGNC:3364|MIM:602012|Ensembl:ENSG00000054179|HPRD:03600|Vega:OTTHUMG00000020953	9	9q34	ectonucleoside triphosphate diphosphohydrolase 2	protein-coding	ENTPD2	ectonucleoside triphosphate diphosphohydrolase 2	O	CD39 antigen-like 1|NTPDase 2|ecto-ATP diphosphohydrolase 2|ecto-ATPDase 2|ecto-ATPase 2	20130505
9606	955	ENTPD6	RP4-738P15.5	CD39L2|IL-6SAG|IL6ST2|NTPDase-6|dJ738P15.3	HGNC:3368|MIM:603160|Ensembl:ENSG00000197586|HPRD:16013|Vega:OTTHUMG00000032116	20	20p11.21	ectonucleoside triphosphate diphosphohydrolase 6 (putative)	protein-coding	ENTPD6	ectonucleoside triphosphate diphosphohydrolase 6 (putative)	O	CD39 antigen-like 2|CD39-like 2|HCV-E2 binding protein 1|NTPDase 6|ectonucleoside triphosphate diphosphohydrolase 6|ectonucleoside triphosphate diphosphohydrolase 6 (putative function)|interleukin 6 signal transducer-2	20130505
9606	956	ENTPD3	-	CD39L3|HB6|NTPDase-3	HGNC:3365|MIM:603161|Ensembl:ENSG00000168032|HPRD:16014|Vega:OTTHUMG00000131390	3	3p21.3	ectonucleoside triphosphate diphosphohydrolase 3	protein-coding	ENTPD3	ectonucleoside triphosphate diphosphohydrolase 3	O	CD39 antigen-like 3|CD39-like 3|NTPDase 3|ecto-ATP diphosphohydrolase 3|ecto-ATPDase 3|ecto-ATPase 3|ecto-apyrase 3	20130504
9606	957	ENTPD5	-	CD39L4|NTPDase-5|PCPH	HGNC:3367|MIM:603162|HPRD:16015	14	14q24	ectonucleoside triphosphate diphosphohydrolase 5	protein-coding	ENTPD5	ectonucleoside triphosphate diphosphohydrolase 5	O	CD39 antigen-like 4|CD39-like 4|ER-UDPase|GDPase ENTPD5|NTPDase 5|Pcph proto-oncogene protein|UDPase ENTPD5|guanosine-diphosphatase ENTPD5|nucleoside diphosphatase|proto-oncogene CPH|uridine-diphosphatase ENTPD5	20130512
9606	958	CD40	-	Bp50|CDW40|TNFRSF5|p50	HGNC:11919|MIM:109535|Ensembl:ENSG00000101017|HPRD:00178|Vega:OTTHUMG00000033053	20	20q12-q13.2	CD40 molecule, TNF receptor superfamily member 5	protein-coding	CD40	CD40 molecule, TNF receptor superfamily member 5	O	B cell surface antigen CD40|B cell-associated molecule|B-cell surface antigen CD40|CD40 antigen (TNF receptor superfamily member 5)|CD40 type II isoform|CD40L receptor|nerve growth factor receptor-related B-lymphocyte activation molecule|tumor necrosis factor receptor superfamily member 5|tumor necrosis factor receptor superfamily, member 5	20130512
9606	959	CD40LG	RP3-527F8.3	CD154|CD40L|HIGM1|IGM|IMD3|T-BAM|TNFSF5|TRAP|gp39|hCD40L	HGNC:11935|MIM:300386|Ensembl:ENSG00000102245|HPRD:02311|Vega:OTTHUMG00000022512	X	Xq26	CD40 ligand	protein-coding	CD40LG	CD40 ligand	O	CD40 antigen ligand|CD40-L|T-B cell-activating molecule|T-cell antigen Gp39|TNF-related activation protein|tumor necrosis factor (ligand) superfamily member 5	20130505
9606	960	CD44	AL133330.1	CDW44|CSPG8|ECMR-III|HCELL|HUTCH-I|IN|LHR|MC56|MDU2|MDU3|MIC4|Pgp1	HGNC:1681|MIM:107269|Ensembl:ENSG00000026508|HPRD:00115|Vega:OTTHUMG00000044388	11	11p13	CD44 molecule (Indian blood group)	protein-coding	CD44	CD44 molecule (Indian blood group)	O	CD44 antigen|GP90 lymphocyte homing/adhesion receptor|Hermes antigen|cell surface glycoprotein CD44|chondroitin sulfate proteoglycan 8|epican|extracellular matrix receptor III|hematopoietic cell E- and L-selectin ligand|heparan sulfate proteoglycan|homing function and Indian blood group system|hyaluronate receptor|phagocytic glycoprotein 1	20130512
9606	961	CD47	-	IAP|MER6|OA3	HGNC:1682|MIM:601028|Ensembl:ENSG00000196776|HPRD:03017|Vega:OTTHUMG00000044216	3	3q13.1-q13.2	CD47 molecule	protein-coding	CD47	CD47 molecule	O	CD47 antigen (Rh-related antigen, integrin-associated signal transducer)|CD47 glycoprotein|Rh-related antigen|antigen identified by monoclonal antibody 1D8|antigenic surface determinant protein OA3|integrin associated protein|integrin-associated protein|integrin-associated signal transducer|leukocyte surface antigen CD47	20130505
9606	962	CD48	RP11-404F10.3	BCM1|BLAST|BLAST1|MEM-102|SLAMF2|hCD48|mCD48	HGNC:1683|MIM:109530|Ensembl:ENSG00000117091|HPRD:00177|Vega:OTTHUMG00000024009	1	1q21.3-q22	CD48 molecule	protein-coding	CD48	CD48 molecule	O	B-lymphocyte activation marker BLAST-1|BCM1 surface antigen|CD48 antigen|CD48 antigen (B-cell membrane protein)|SLAM family member 2|TCT.1|leukocyte antigen MEM-102|signaling lymphocytic activation molecule 2	20130512
9606	963	CD53	-	MOX44|TSPAN25	HGNC:1686|MIM:151525|Ensembl:ENSG00000143119|HPRD:01054|Vega:OTTHUMG00000048020	1	1p13	CD53 molecule	protein-coding	CD53	CD53 molecule	O	CD53 antigen|CD53 glycoprotein|CD53 tetraspan antigen|antigen MOX44 identified by monoclonal antibody MRC-OX44|cell surface antigen|cell surface glycoprotein CD53|leukocyte surface antigen CD53|tetraspanin-25|transmembrane glycoprotein|tspan-25	20130505
9606	965	CD58	RP5-1086K13.2	LFA-3|LFA3|ag3	HGNC:1688|MIM:153420|Ensembl:ENSG00000116815|HPRD:01081|Vega:OTTHUMG00000022749	1	1p13	CD58 molecule	protein-coding	CD58	CD58 molecule	O	CD58 antigen, (lymphocyte function-associated antigen 3)|lymphocyte function-associated antigen 3|surface glycoprotein LFA-3	20130505
9606	966	CD59	-	16.3A5|1F5|EJ16|EJ30|EL32|G344|HRF-20|HRF20|MAC-IP|MACIF|MEM43|MIC11|MIN1|MIN2|MIN3|MIRL|MSK21|p18-20	HGNC:1689|MIM:107271|HPRD:00117	11	11p13	CD59 molecule, complement regulatory protein	protein-coding	CD59	CD59 molecule, complement regulatory protein	O	1F5 antigen|20 kDa homologous restriction factor|CD59 antigen p18-20 (antigen identified by monoclonal antibodies 16.3A5, EJ16, EJ30, EL32 and G344)|CD59 glycoprotein|Ly-6-like protein|MEM43 antigen|T cell-activating protein|human leukocyte antigen MIC11|lymphocytic antigen CD59/MEM43|membrane attack complex (MAC) inhibition factor|membrane attack complex inhibition factor|membrane inhibitor of r…	20130512
9606	967	CD63	-	LAMP-3|ME491|MLA1|OMA81H|TSPAN30	HGNC:1692|MIM:155740|Ensembl:ENSG00000135404|HPRD:01121|Vega:OTTHUMG00000170454	12	12q12-q13	CD63 molecule	protein-coding	CD63	CD63 molecule	O	CD63 antigen|CD63 antigen (melanoma 1 antigen)|granulophysin|lysosomal-associated membrane protein 3|lysosome-associated membrane glycoprotein 3|melanoma-associated antigen ME491|melanoma-associated antigen MLA1|ocular melanoma-associated antigen|tetraspanin-30|tspan-30	20130505
9606	968	CD68	-	GP110|LAMP4|SCARD1	HGNC:1693|MIM:153634|Ensembl:ENSG00000129226|HPRD:01093|Vega:OTTHUMG00000108146	17	17p13	CD68 molecule	protein-coding	CD68	CD68 molecule	O	CD68 antigen|macrophage antigen CD68|macrosialin|scavenger receptor class D, member 1	20130512
9606	969	CD69	-	AIM|BL-AC/P26|CLEC2C|EA1|GP32/28|MLR-3	HGNC:1694|MIM:107273|Ensembl:ENSG00000110848|HPRD:00119|Vega:OTTHUMG00000168481	12	12p13	CD69 molecule	protein-coding	CD69	CD69 molecule	O	C-type lectin domain family 2, member C|CD69 antigen (p60, early T-cell activation antigen)|activation inducer molecule (AIM/CD69)|early T-cell activation antigen p60|early activation antigen CD69|early lymphocyte activation antigen|leukocyte surface antigen Leu-23	20130226
9606	970	CD70	-	CD27L|CD27LG|TNFSF7	HGNC:11937|MIM:602840|Ensembl:ENSG00000125726|HPRD:18515|Vega:OTTHUMG00000181834	19	19p13	CD70 molecule	protein-coding	CD70	CD70 molecule	O	CD27 ligand|CD27-L|CD70 antigen|Ki-24 antigen|surface antigen CD70|tumor necrosis factor (ligand) superfamily, member 7|tumor necrosis factor ligand superfamily member 7	20130505
9606	971	CD72	RP11-331F9.9	CD72b|LYB2	HGNC:1696|MIM:107272|Ensembl:ENSG00000137101|HPRD:00118	9	9p13.3	CD72 molecule	protein-coding	CD72	CD72 molecule	O	B-cell differentiation antigen CD72|CD72 antigen|lyb-2	20130505
9606	972	CD74	-	DHLAG|HLADG|II|Ia-GAMMA	HGNC:1697|MIM:142790|Ensembl:ENSG00000019582|HPRD:00825|Vega:OTTHUMG00000163559	5	5q32	CD74 molecule, major histocompatibility complex, class II invariant chain	protein-coding	CD74	CD74 molecule, major histocompatibility complex, class II invariant chain	O	CD74 antigen (invariant polypeptide of major histocompatibility complex, class II antigen-associated)|HLA class II histocompatibility antigen gamma chain|HLA-DR antigens-associated invariant chain|HLA-DR-gamma|Ia-associated invariant chain|MHC HLA-DR gamma chain|gamma chain of class II antigens|p33	20130505
9606	973	CD79A	-	IGA|MB-1	HGNC:1698|MIM:112205|Ensembl:ENSG00000105369|HPRD:00203|Vega:OTTHUMG00000182678	19	19q13.2	CD79a molecule, immunoglobulin-associated alpha	protein-coding	CD79A	CD79a molecule, immunoglobulin-associated alpha	O	B-cell antigen receptor complex-associated protein alpha chain|CD79a antigen (immunoglobulin-associated alpha)|MB-1 membrane glycoprotein|ig-alpha|membrane-bound immunoglobulin-associated protein|surface IgM-associated protein	20130505
9606	974	CD79B	-	AGM6|B29|IGB	HGNC:1699|MIM:147245|Ensembl:ENSG00000007312|HPRD:00922|Vega:OTTHUMG00000172294	17	17q23	CD79b molecule, immunoglobulin-associated beta	protein-coding	CD79B	CD79b molecule, immunoglobulin-associated beta	O	B-cell antigen receptor complex-associated protein beta chain|B-cell-specific glycoprotein B29|CD79b antigen (immunoglobulin-associated beta)|Ig-beta|immunoglobulin-associated B29 protein	20130505
9606	975	CD81	-	CVID6|S5.7|TAPA1|TSPAN28	HGNC:1701|MIM:186845|Ensembl:ENSG00000110651|HPRD:08924|Vega:OTTHUMG00000009892	11	11p15.5	CD81 molecule	protein-coding	CD81	CD81 molecule	O	26 kDa cell surface protein TAPA-1|CD81 antigen|CD81 antigen (target of antiproliferative antibody 1)|tetraspanin-28|tspan-28	20130505
9606	976	CD97	-	TM7LN1	HGNC:1711|MIM:601211|Ensembl:ENSG00000123146|HPRD:03130|Vega:OTTHUMG00000182166	19	19p13	CD97 molecule	protein-coding	CD97	CD97 molecule	O	CD97 antigen|leukocyte antigen CD97|seven transmembrane helix receptor|seven-span transmembrane protein|seven-transmembrane, heterodimeric receptor associated with inflammation	20130505
9606	977	CD151	-	GP27|MER2|PETA-3|RAPH|SFA1|TSPAN24	HGNC:1630|MIM:602243|Ensembl:ENSG00000177697|HPRD:03763|Vega:OTTHUMG00000133311	11	11p15.5	CD151 molecule (Raph blood group)	protein-coding	CD151	CD151 molecule (Raph blood group)	O	CD151 antigen|CD151 antigen (Raph blood group)|hemidesmosomal tetraspanin CD151|membrane glycoprotein SFA-1|platelet surface glycoprotein gp27|platelet-endothelial cell tetraspan antigen 3|platelet-endothelial tetraspan antigen 3|tetraspanin-24|tspan-24	20130505
9606	978	CDA	-	CDD	HGNC:1712|MIM:123920|Ensembl:ENSG00000158825|HPRD:11744|Vega:OTTHUMG00000002845	1	1p36.2-p35	cytidine deaminase	protein-coding	CDA	cytidine deaminase	O	cytidine aminohydrolase|cytosine nucleoside deaminase|small cytidine deaminase	20130505
9606	981	CDAN3	-	CDA3|CDAIII	HGNC:1715|MIM:105600	15	15q21-q25	congenital dyserythropoietic anemia, type III	unknown	CDAN3	congenital dyserythropoietic anemia, type III	O	-	20130226
9606	982	CDB2	-	CDBII|CDTB	HGNC:1716|MIM:602082	10	10q23-q24	corneal dystrophy of Bowman layer type II (Thiel-Behnke)	unknown	CDB2	corneal dystrophy of Bowman layer type II (Thiel-Behnke)	O	-	20130226
9606	983	CDK1	-	CDC2|CDC28A|P34CDC2	HGNC:1722|MIM:116940|Ensembl:ENSG00000170312|HPRD:00302|Vega:OTTHUMG00000018290	10	10q21.1	cyclin-dependent kinase 1	protein-coding	CDK1	cyclin-dependent kinase 1	O	cell cycle controller CDC2|cell division control protein 2 homolog|cell division cycle 2, G1 to S and G2 to M|cell division protein kinase 1|p34 protein kinase	20130505
9606	984	CDK11B	-	CDC2L1|CDK11|CDK11-p110|CDK11-p46|CDK11-p58|CLK-1|PK58|p58|p58CDC2L1|p58CLK-1	HGNC:1729|MIM:176873|Ensembl:ENSG00000248333|HPRD:08909	1	1p36.33	cyclin-dependent kinase 11B	protein-coding	CDK11B	cyclin-dependent kinase 11B	O	CDC-related protein kinase p58|PITSLRE serine/threonine-protein kinase CDC2L1|PITSLREA|cell division cycle 2-like 1 (PITSLRE proteins)|cell division cycle 2-like protein kinase 1|cell division protein kinase 11B|galactosyltransferase-associated protein kinase p58/GTA|p58 CLK-1	20130505
9606	987	LRBA	-	BGL|CDC4L|CVID8|LAB300|LBA	HGNC:1742|MIM:606453|Ensembl:ENSG00000198589|HPRD:07344|Vega:OTTHUMG00000161443	4	4q31.3	LPS-responsive vesicle trafficking, beach and anchor containing	protein-coding	LRBA	LPS-responsive vesicle trafficking, beach and anchor containing	O	CDC4-like protein|lipopolysaccharide-responsive and beige-like anchor protein|vesicle trafficking, beach and anchor containing	20130505
9606	988	CDC5L	RP1-319D22.1	CDC5|CDC5-LIKE|CEF1|PCDC5RP|dJ319D22.1	HGNC:1743|MIM:602868|Ensembl:ENSG00000096401|HPRD:04184|Vega:OTTHUMG00000014767	6	6p21	cell division cycle 5-like	protein-coding	CDC5L	cell division cycle 5-like	O	CDC5 cell division cycle 5-like|Cdc5-related protein|cell division cycle 5-like protein|dJ319D22.1 (CDC5-like protein)|pombe cdc5-related protein	20130505
9606	989	7-Sep	-	CDC10|CDC3|NBLA02942|SEPT7A	HGNC:1717|MIM:603151|HPRD:04398	7	7p14.2	septin 7	protein-coding	7-Sep	septin 7	O	CDC10 (cell division cycle 10, S. cerevisiae, homolog)|CDC10 protein homolog|septin-7	20130505
9606	990	CDC6	-	CDC18L|HsCDC18|HsCDC6	HGNC:1744|MIM:602627|Ensembl:ENSG00000094804|HPRD:04022|Vega:OTTHUMG00000133324	17	17q21.3	cell division cycle 6	protein-coding	CDC6	cell division cycle 6	O	CDC6 cell division cycle 6 homolog|CDC6-related protein|cdc18-related protein|cell division control protein 6 homolog|cell division cycle 6 homolog|p62(cdc6)	20130505
9606	991	CDC20	-	CDC20A|bA276H19.3|p55CDC	HGNC:1723|MIM:603618|Ensembl:ENSG00000117399|HPRD:04686|Vega:OTTHUMG00000007420	1	1p34.1	cell division cycle 20	protein-coding	CDC20	cell division cycle 20	O	CDC20 cell division cycle 20 homolog|cell division cycle 20 homolog|cell division cycle protein 20 homolog	20130505
9606	993	CDC25A	-	CDC25A2	HGNC:1725|MIM:116947|Ensembl:ENSG00000164045|HPRD:00305|Vega:OTTHUMG00000133535	3	3p21	cell division cycle 25A	protein-coding	CDC25A	cell division cycle 25A	O	CDC25A2-CAG isoform|M-phase inducer phosphatase 1|dual specificity phosphatase CDC25A	20130505
9606	994	CDC25B	RP5-1009E24.3	-	HGNC:1726|MIM:116949|Ensembl:ENSG00000101224|HPRD:00307|Vega:OTTHUMG00000031764	20	20p13	cell division cycle 25B	protein-coding	CDC25B	cell division cycle 25B	O	M-phase inducer phosphatase 2|dual specificity phosphatase Cdc25B	20130505
9606	995	CDC25C	-	CDC25|PPP1R60	HGNC:1727|MIM:157680|Ensembl:ENSG00000158402|HPRD:01146|Vega:OTTHUMG00000129203	5	5q31	cell division cycle 25C	protein-coding	CDC25C	cell division cycle 25C	O	M-phase inducer phosphatase 3|dual specificity phosphatase CDC25C|mitosis inducer CDC25|phosphotyrosine phosphatase|protein phosphatase 1, regulatory subunit 60	20130505
9606	996	CDC27	-	ANAPC3|APC3|CDC27Hs|D0S1430E|D17S978E|HNUC|NUC2	HGNC:1728|MIM:116946|Ensembl:ENSG00000004897|HPRD:00304|Vega:OTTHUMG00000166429	17	17q21.32	cell division cycle 27	protein-coding	CDC27	cell division cycle 27	O	CDC27 homolog|H-NUC|anaphase promoting complex subunit 3|anaphase-promoting complex subunit 3|anaphase-promoting complex, protein 3|cell division cycle 27 homolog|cell division cycle protein 27 homolog|nuc2 homolog	20130505
9606	997	CDC34	-	E2-CDC34|UBC3|UBCH3|UBE2R1	HGNC:1734|MIM:116948|Ensembl:ENSG00000099804|HPRD:00306|Vega:OTTHUMG00000180558	19	19p13.3	cell division cycle 34	protein-coding	CDC34	cell division cycle 34	O	cell division cycle 34 homolog|ubiquitin carrier protein|ubiquitin-conjugating enzyme E2 R1|ubiquitin-conjugating enzyme E2-32 KDA complementing|ubiquitin-conjugating enzyme E2-CDC34|ubiquitin-protein ligase R1	20130505
9606	998	CDC42	RP1-224A6.5	CDC42Hs|G25K	HGNC:1736|MIM:116952|Ensembl:ENSG00000070831|HPRD:00309|Vega:OTTHUMG00000002753	1	1p36.1	cell division cycle 42	protein-coding	CDC42	cell division cycle 42	O	G25K GTP-binding protein|GTP binding protein, 25kDa|GTP-binding protein, 25kD|cell division control protein 42 homolog|dJ224A6.1.1 (cell division cycle 42 (GTP-binding protein, 25kD))|dJ224A6.1.2 (cell division cycle 42 (GTP-binding protein, 25kD))|growth-regulating protein|small GTP binding protein CDC42	20130505
9606	999	CDH1	-	Arc-1|CD324|CDHE|ECAD|LCAM|UVO	HGNC:1748|MIM:192090|Ensembl:ENSG00000039068|HPRD:01885|Vega:OTTHUMG00000137561	16	16q22.1	cadherin 1, type 1, E-cadherin (epithelial)	protein-coding	CDH1	cadherin 1, type 1, E-cadherin (epithelial)	O	CAM 120/80|E-Cadherin|cadherin 1, E-cadherin (epithelial)|cadherin-1|calcium-dependent adhesion protein, epithelial|cell-CAM 120/80|epithelial cadherin|uvomorulin	20130512
9606	1000	CDH2	-	CD325|CDHN|CDw325|NCAD	HGNC:1759|MIM:114020|Ensembl:ENSG00000170558|HPRD:00226|Vega:OTTHUMG00000059940	18	18q11.2	cadherin 2, type 1, N-cadherin (neuronal)	protein-coding	CDH2	cadherin 2, type 1, N-cadherin (neuronal)	O	N-cadherin 1|cadherin 2, N-cadherin (neuronal)|cadherin-2|calcium-dependent adhesion protein, neuronal|neural cadherin|neural-cadherin	20130512
9606	1001	CDH3	-	CDHP|HJMD|PCAD	HGNC:1762|MIM:114021|Ensembl:ENSG00000062038|HPRD:00227|Vega:OTTHUMG00000137560	16	16q22.1	cadherin 3, type 1, P-cadherin (placental)	protein-coding	CDH3	cadherin 3, type 1, P-cadherin (placental)	O	cadherin-3|calcium-dependent adhesion protein, placental	20130505
9606	1002	CDH4	-	CAD4|RCAD	HGNC:1763|MIM:603006|Ensembl:ENSG00000179242|HPRD:04304|Vega:OTTHUMG00000032890	20	20q13.3	cadherin 4, type 1, R-cadherin (retinal)	protein-coding	CDH4	cadherin 4, type 1, R-cadherin (retinal)	O	R-CAD|R-cadherin|cadherin 4, type 1, preproprotein|cadherin-4|retinal cadherin	20130505
9606	1003	CDH5	-	7B4|CD144	HGNC:1764|MIM:601120|Ensembl:ENSG00000179776|HPRD:03075|Vega:OTTHUMG00000137495	16	16q22.1	cadherin 5, type 2 (vascular endothelium)	protein-coding	CDH5	cadherin 5, type 2 (vascular endothelium)	O	7B4 antigen|VE-cadherin|cadherin 5, type 2, VE-cadherin (vascular epithelium)|cadherin-5|cd144 antigen|endothelial-specific cadherin|vascular endothelial cadherin	20130505
9606	1004	CDH6	-	CAD6|KCAD	HGNC:1765|MIM:603007|Ensembl:ENSG00000113361|HPRD:04305|Vega:OTTHUMG00000090673	5	5p13.3	cadherin 6, type 2, K-cadherin (fetal kidney)	protein-coding	CDH6	cadherin 6, type 2, K-cadherin (fetal kidney)	O	cadherin-6	20130505
9606	1005	CDH7	-	CDH7L1	HGNC:1766|MIM:605806|Ensembl:ENSG00000081138|HPRD:12049|Vega:OTTHUMG00000132800	18	18q22.1	cadherin 7, type 2	protein-coding	CDH7	cadherin 7, type 2	O	cadherin-7	20130505
9606	1006	CDH8	-	Nbla04261	HGNC:1767|MIM:603008|HPRD:04306	16	16q22.1	cadherin 8, type 2	protein-coding	CDH8	cadherin 8, type 2	O	cadherin-8	20130505
9606	1007	CDH9	-	-	HGNC:1768|MIM:609974|Ensembl:ENSG00000113100|HPRD:13021|Vega:OTTHUMG00000090671	5	5p14	cadherin 9, type 2 (T1-cadherin)	protein-coding	CDH9	cadherin 9, type 2 (T1-cadherin)	O	T1-cadherin|cadherin-9	20130505
9606	1008	CDH10	-	-	HGNC:1749|MIM:604555|Ensembl:ENSG00000040731|HPRD:05187|Vega:OTTHUMG00000090667	5	5p14.2	cadherin 10, type 2 (T2-cadherin)	protein-coding	CDH10	cadherin 10, type 2 (T2-cadherin)	O	T2-cadherin|cadherin-10	20130505
9606	1009	CDH11	-	CAD11|CDHOB|OB|OSF-4	HGNC:1750|MIM:600023|HPRD:08960	16	16q21	cadherin 11, type 2, OB-cadherin (osteoblast)	protein-coding	CDH11	cadherin 11, type 2, OB-cadherin (osteoblast)	O	cadherin-11	20130505
9606	1010	CDH12	-	CDHB	HGNC:1751|MIM:600562|Ensembl:ENSG00000154162|HPRD:11081|Vega:OTTHUMG00000090591	5	5p14.3	cadherin 12, type 2 (N-cadherin 2)	protein-coding	CDH12	cadherin 12, type 2 (N-cadherin 2)	O	Br-cadherin|N-cadherin 2|brain cadherin|brain-cadherin|cadherin, neural type, 2|cadherin-12|neural type cadherin 2|neuronal cadherin 2	20130226
9606	1011	CDH12P2	-	C41-CAD|CDH12P	HGNC:1752	5	5q13.1	cadherin 12 (N-cadherin 2) pseudogene 2	pseudo	CDH12P2	cadherin 12 (N-cadherin 2) pseudogene 2	O	-	20130226
9606	1012	CDH13	-	CDHH|P105	HGNC:1753|MIM:601364|Ensembl:ENSG00000140945|HPRD:03219|Vega:OTTHUMG00000176635	16	16q23.3	cadherin 13, H-cadherin (heart)	protein-coding	CDH13	cadherin 13, H-cadherin (heart)	O	H-cadherin|T-cad|T-cadherin|cadherin-13|heart cadherin	20130512
9606	1013	CDH15	-	CDH14|CDH3|CDHM|MCAD|MRD3	HGNC:1754|MIM:114019|Ensembl:ENSG00000129910|HPRD:00225|Vega:OTTHUMG00000138045	16	16q24.3	cadherin 15, type 1, M-cadherin (myotubule)	protein-coding	CDH15	cadherin 15, type 1, M-cadherin (myotubule)	O	cadherin-14|cadherin-15|cadherin-3|muscle-cadherin	20130505
9606	1014	CDH16	UNQ695/PRO1340	-	HGNC:1755|MIM:603118|Ensembl:ENSG00000166589|HPRD:11929|Vega:OTTHUMG00000137518	16	16q22.1	cadherin 16, KSP-cadherin	protein-coding	CDH16	cadherin 16, KSP-cadherin	O	KSP-cadherin|cadherin-16|kidney-specific cadherin	20130505
9606	1015	CDH17	-	CDH16|HPT-1|HPT1	HGNC:1756|MIM:603017|Ensembl:ENSG00000079112|HPRD:04312|Vega:OTTHUMG00000164391	8	8q22.1	cadherin 17, LI cadherin (liver-intestine)	protein-coding	CDH17	cadherin 17, LI cadherin (liver-intestine)	O	HPT-1 cadherin|LI cadherin|LI-cadherin|cadherin-16|cadherin-17|human intestinal peptide-associated transporter HPT-1|human peptide transporter 1|intestinal peptide-associated transporter HPT-1|liver-intestine cadherin	20130505
9606	1016	CDH18	-	CDH14|CDH14L|CDH24	HGNC:1757|MIM:603019|Ensembl:ENSG00000145526|HPRD:04314|Vega:OTTHUMG00000090578	5	5p14.3	cadherin 18, type 2	protein-coding	CDH18	cadherin 18, type 2	O	cadherin-14|cadherin-18|cadherin-like 24|ey-cadherin	20130505
9606	1017	CDK2	-	p33(CDK2)	HGNC:1771|MIM:116953|Ensembl:ENSG00000123374|HPRD:00310|Vega:OTTHUMG00000170575	12	12q13	cyclin-dependent kinase 2	protein-coding	CDK2	cyclin-dependent kinase 2	O	cdc2-related protein kinase|cell devision kinase 2|cell division protein kinase 2|p33 protein kinase	20130512
9606	1018	CDK3	-	-	HGNC:1772|MIM:123828|Ensembl:ENSG00000250506|HPRD:00446|Vega:OTTHUMG00000154861	17	17q25.1	cyclin-dependent kinase 3	protein-coding	CDK3	cyclin-dependent kinase 3	O	cell division protein kinase 3	20130505
9606	1019	CDK4	-	CMM3|PSK-J3	HGNC:1773|MIM:123829|Ensembl:ENSG00000135446|HPRD:00447|Vega:OTTHUMG00000170382	12	12q14	cyclin-dependent kinase 4	protein-coding	CDK4	cyclin-dependent kinase 4	O	cell division protein kinase 4	20130505
9606	1020	CDK5	-	PSSALRE	HGNC:1774|MIM:123831|HPRD:00449	7	7q36	cyclin-dependent kinase 5	protein-coding	CDK5	cyclin-dependent kinase 5	O	TPKII catalytic subunit|cell division protein kinase 5|protein kinase CDK5 splicing|serine/threonine-protein kinase PSSALRE|tau protein kinase II catalytic subunit	20130505
9606	1021	CDK6	-	PLSTIRE	HGNC:1777|MIM:603368|Ensembl:ENSG00000105810|HPRD:04533|Vega:OTTHUMG00000131697	7	7q21-q22	cyclin-dependent kinase 6	protein-coding	CDK6	cyclin-dependent kinase 6	O	cell division protein kinase 6|serine/threonine-protein kinase PLSTIRE	20130505
9606	1022	CDK7	-	CAK1|CDKN7|HCAK|MO15|STK1|p39MO15	HGNC:1778|MIM:601955|Ensembl:ENSG00000134058|HPRD:15993|Vega:OTTHUMG00000099358	5	5q12.1	cyclin-dependent kinase 7	protein-coding	CDK7	cyclin-dependent kinase 7	O	39 KDa protein kinase|CAK|CDK-activating kinase 1|TFIIH basal transcription factor complex kinase subunit|cell division protein kinase 7|cyclin-dependent kinase 7 (MO15 homolog, Xenopus laevis, cdk-activating kinase)|homolog of Xenopus MO15 Cdk-activating kinase|kinase subunit of CAK|p39 Mo15|protein kinase|serine/threonine kinase stk1|serine/threonine protein kinase 1|serine/threonine protein ki…	20130505
9606	1023	CDL2	-	-	HGNC:1793	-	-	Cornelia de Lange syndrome 2	unknown	CDL2	Cornelia de Lange syndrome 2	O	-	20130226
9606	1024	CDK8	-	K35	HGNC:1779|MIM:603184|HPRD:04422	13	13q12	cyclin-dependent kinase 8	protein-coding	CDK8	cyclin-dependent kinase 8	O	CDK8 protein kinase|cell division protein kinase 8|mediator complex subunit CDK8|mediator of RNA polymerase II transcription subunit CDK8|protein kinase K35	20130505
9606	1025	CDK9	RP11-228B15.5	C-2k|CDC2L4|CTK1|PITALRE|TAK	HGNC:1780|MIM:603251|Ensembl:ENSG00000136807|HPRD:16016|Vega:OTTHUMG00000020715	9	9q34.1	cyclin-dependent kinase 9	protein-coding	CDK9	cyclin-dependent kinase 9	O	CDC2-related kinase|cell division cycle 2-like protein kinase 4|cell division protein kinase 9|serine/threonine protein kinase PITALRE|serine/threonine-protein kinase PITALRE|tat-associated kinase complex catalytic subunit	20130512
9606	1026	CDKN1A	-	CAP20|CDKN1|CIP1|MDA-6|P21|SDI1|WAF1|p21CIP1	HGNC:1784|MIM:116899|Ensembl:ENSG00000124762|HPRD:00298|Vega:OTTHUMG00000014603	6	6p21.2	cyclin-dependent kinase inhibitor 1A (p21, Cip1)	protein-coding	CDKN1A	cyclin-dependent kinase inhibitor 1A (p21, Cip1)	O	CDK-interacting protein 1|CDK-interaction protein 1|DNA synthesis inhibitor|cyclin-dependent kinase inhibitor 1|melanoma differentiation associated protein 6|wild-type p53-activated fragment 1	20130512
9606	1027	CDKN1B	-	CDKN4|KIP1|MEN1B|MEN4|P27KIP1	HGNC:1785|MIM:600778|Ensembl:ENSG00000111276|HPRD:02867|Vega:OTTHUMG00000149914	12	12p13.1-p12	cyclin-dependent kinase inhibitor 1B (p27, Kip1)	protein-coding	CDKN1B	cyclin-dependent kinase inhibitor 1B (p27, Kip1)	O	cyclin-dependent kinase inhibitor 1B	20130512
9606	1028	CDKN1C	-	BWCR|BWS|KIP2|WBS|p57|p57Kip2	HGNC:1786|MIM:600856|Ensembl:ENSG00000129757|HPRD:02913|Vega:OTTHUMG00000010040	11	11p15.5	cyclin-dependent kinase inhibitor 1C (p57, Kip2)	protein-coding	CDKN1C	cyclin-dependent kinase inhibitor 1C (p57, Kip2)	O	cyclin-dependent kinase inhibitor 1C|cyclin-dependent kinase inhibitor p57	20130512
9606	1029	CDKN2A	-	ARF|CDK4I|CDKN2|CMM2|INK4|INK4A|MLM|MTS-1|MTS1|P14|P14ARF|P16|P16-INK4A|P16INK4|P16INK4A|P19|P19ARF|TP16	HGNC:1787|MIM:600160|Ensembl:ENSG00000147889|HPRD:02542|Vega:OTTHUMG00000019686	9	9p21	cyclin-dependent kinase inhibitor 2A	protein-coding	CDKN2A	cyclin-dependent kinase inhibitor 2A	O	CDK4 inhibitor p16-INK4|cell cycle negative regulator beta|cyclin-dependent kinase 4 inhibitor A|cyclin-dependent kinase inhibitor 2A (melanoma, p16, inhibits CDK4)|multiple tumor suppressor 1	20130512
9606	1030	CDKN2B	RP11-149I2.1	CDK4I|INK4B|MTS2|P15|TP15|p15INK4b	HGNC:1788|MIM:600431|Ensembl:ENSG00000147883|HPRD:02696|Vega:OTTHUMG00000019691	9	9p21	cyclin-dependent kinase inhibitor 2B (p15, inhibits CDK4)	protein-coding	CDKN2B	cyclin-dependent kinase inhibitor 2B (p15, inhibits CDK4)	O	CDK inhibitory protein|CDK4B inhibitor|MTS-2|cyclin-dependent kinase 4 inhibitor B|cyclin-dependent kinases 4 and 6 binding protein|multiple tumor suppressor 2|p14-INK4b|p14_CDK inhibitor|p14_INK4B|p15 CDK inhibitor|p15-INK4b|p15_INK4B	20130505
9606	1031	CDKN2C	RP11-278J17.2	INK4C|p18|p18-INK4C	HGNC:1789|MIM:603369|Ensembl:ENSG00000123080|HPRD:04534|Vega:OTTHUMG00000008046	1	1p32	cyclin-dependent kinase inhibitor 2C (p18, inhibits CDK4)	protein-coding	CDKN2C	cyclin-dependent kinase inhibitor 2C (p18, inhibits CDK4)	O	CDK6 inhibitor p18|cyclin-dependent inhibitor|cyclin-dependent kinase 4 inhibitor C|cyclin-dependent kinase 6 inhibitor p18|p18-INK6	20130505
9606	1032	CDKN2D	-	INK4D|p19|p19-INK4D	HGNC:1790|MIM:600927|Ensembl:ENSG00000129355|HPRD:02957|Vega:OTTHUMG00000180583	19	19p13	cyclin-dependent kinase inhibitor 2D (p19, inhibits CDK4)	protein-coding	CDKN2D	cyclin-dependent kinase inhibitor 2D (p19, inhibits CDK4)	O	CDK inhibitor p19INK4d|cell cycle inhibitor, Nur77 associating protein|cyclin-dependent kinase 4 inhibitor D|cyclin-dependent kinase 4 inhibitor D p19|inhibitor of cyclin-dependent kinase 4d	20130505
9606	1033	CDKN3	-	CDI1|CIP2|KAP|KAP1	HGNC:1791|MIM:123832|Ensembl:ENSG00000100526|HPRD:00450|Vega:OTTHUMG00000140302	14	14q22	cyclin-dependent kinase inhibitor 3	protein-coding	CDKN3	cyclin-dependent kinase inhibitor 3	O	CDK2-associated dual specificity phosphatase|CDK2-associated dual-specificity phosphatase|Cdk-associated protein phosphatase|cyclin-dependent kinase interacting protein 2|cyclin-dependent kinase interactor 1|cyclin-dependent kinase-interacting protein 2|kinase associated phosphatase|kinase-associated phosphatase	20130505
9606	1036	CDO1	-	-	HGNC:1795|MIM:603943|Ensembl:ENSG00000129596|HPRD:06806|Vega:OTTHUMG00000128891	5	5q23.2	cysteine dioxygenase, type I	protein-coding	CDO1	cysteine dioxygenase, type I	O	CDO|CDO-I|cysteine dioxygenase type 1	20130505
9606	1038	CDR1	RP1-177G6.1	CDR|CDR34|CDR62A	HGNC:1798|MIM:302650|Ensembl:ENSG00000184258|HPRD:02361|Vega:OTTHUMG00000137398	X	Xq27.1-q27.2	cerebellar degeneration-related protein 1, 34kDa	protein-coding	CDR1	cerebellar degeneration-related protein 1, 34kDa	O	cerebellar degeneration-related antigen 1	20130226
9606	1039	CDR2	-	CDR62|Yo	HGNC:1799|MIM:117340|Ensembl:ENSG00000140743|HPRD:06681|Vega:OTTHUMG00000175463	16	16p12.3	cerebellar degeneration-related protein 2, 62kDa	protein-coding	CDR2	cerebellar degeneration-related protein 2, 62kDa	O	Yo paraneoplastic antigen|cerebellar degeneration-related protein 2|major Yo paraneoplastic antigen|paraneoplastic cerebellar degeneration-associated antigen	20130505
9606	1040	CDS1	-	CDS	HGNC:1800|MIM:603548|Ensembl:ENSG00000163624|HPRD:11944|Vega:OTTHUMG00000130428	4	4q21.23	CDP-diacylglycerol synthase (phosphatidate cytidylyltransferase) 1	protein-coding	CDS1	CDP-diacylglycerol synthase (phosphatidate cytidylyltransferase) 1	O	CDP-DAG synthase 1|CDP-DG synthase 1|CDP-DG synthetase 1|CDP-diacylglycerol synthase 1|CDP-diglyceride pyrophosphorylase 1|CDP-diglyceride synthase 1|CDP-diglyceride synthetase 1|CDS 1|CTP:phosphatidate cytidylyltransferase 1|phosphatidate cytidylyltransferase 1	20130505
9606	1041	CDSN	DADB-141O4.5	D6S586E|HTSS|HTSS1|PSS|S	HGNC:1802|MIM:602593|Ensembl:ENSG00000204539|HPRD:03998|Vega:OTTHUMG00000031150	6	6p21.3	corneodesmosin	protein-coding	CDSN	corneodesmosin	O	differentiated keratinocyte S protein	20130505
9606	1043	CD52	-	CDW52	HGNC:1804|MIM:114280|Ensembl:ENSG00000169442|HPRD:00257|Vega:OTTHUMG00000003491	1	1p36	CD52 molecule	protein-coding	CD52	CD52 molecule	O	CAMPATH-1 antigen|CD52 antigen (CAMPATH-1 antigen)|CDW52 antigen (CAMPATH-1 antigen)|cambridge pathology 1 antigen|epididymal secretory protein E5|he5|human epididymis-specific protein 5	20130505
9606	1044	CDX1	-	-	HGNC:1805|MIM:600746|HPRD:02849	5	5q32	caudal type homeobox 1	protein-coding	CDX1	caudal type homeobox 1	O	caudal type homeo box transcription factor 1|caudal type homeobox transcription factor 1|caudal-type homeobox protein 1|caudal-type homeobox protein CDX1|homeobox protein CDX-1	20130502
9606	1045	CDX2	-	CDX-3|CDX3	HGNC:1806|MIM:600297|HPRD:02622	13	13q12.3	caudal type homeobox 2	protein-coding	CDX2	caudal type homeobox 2	O	caudal type homeo box transcription factor 2|caudal type homeobox transcription factor 2|caudal-type homeobox protein 2|homeobox protein CDX-2	20130512
9606	1046	CDX4	-	-	HGNC:1808|MIM:300025|HPRD:02065	X	Xq13.2	caudal type homeobox 4	protein-coding	CDX4	caudal type homeobox 4	O	caudal type homeobox transcription factor 4|caudal-type homeobox protein 4|homeobox protein CDX-4	20130406
9606	1047	CLGN	-	-	HGNC:2060|MIM:601858|Ensembl:ENSG00000153132|HPRD:03513|Vega:OTTHUMG00000133414	4	4q28.3-q31.1	calmegin	protein-coding	CLGN	calmegin	O	-	20130505
9606	1048	CEACAM5	-	CD66e|CEA	HGNC:1817|MIM:114890|HPRD:00274	19	19q13.1-q13.2	carcinoembryonic antigen-related cell adhesion molecule 5	protein-coding	CEACAM5	carcinoembryonic antigen-related cell adhesion molecule 5	O	meconium antigen 100	20130505
9606	1050	CEBPA	-	C/EBP-alpha|CEBP	HGNC:1833|MIM:116897|Ensembl:ENSG00000245848|HPRD:00296|Vega:OTTHUMG00000161461	19	19q13.1	CCAAT/enhancer binding protein (C/EBP), alpha	protein-coding	CEBPA	CCAAT/enhancer binding protein (C/EBP), alpha	O	CCAAT/enhancer-binding protein alpha	20130505
9606	1051	CEBPB	PP9092	C/EBP-beta|CRP2|IL6DBP|LAP|NF-IL6|TCF5	HGNC:1834|MIM:189965|Ensembl:ENSG00000172216|HPRD:01801|Vega:OTTHUMG00000032715	20	20q13.1	CCAAT/enhancer binding protein (C/EBP), beta	protein-coding	CEBPB	CCAAT/enhancer binding protein (C/EBP), beta	O	CCAAT/enhancer-binding protein beta|TCF-5|interleukin 6-dependent DNA-binding protein|liver-enriched transcriptional activator protein|nuclear factor NF-IL6|nuclear factor of interleukin 6|transcription factor 5	20130505
9606	1052	CEBPD	-	C/EBP-delta|CELF|CRP3|NF-IL6-beta	HGNC:1835|MIM:116898|HPRD:00297	8	8p11.2-p11.1	CCAAT/enhancer binding protein (C/EBP), delta	protein-coding	CEBPD	CCAAT/enhancer binding protein (C/EBP), delta	O	CCAAT/enhancer-binding protein delta|c/EBP delta|nuclear factor NF-IL6-beta	20130505
9606	1053	CEBPE	-	C/EBP-epsilon|CRP1	HGNC:1836|MIM:600749|Ensembl:ENSG00000092067|HPRD:02852|Vega:OTTHUMG00000028719	14	14q11.2	CCAAT/enhancer binding protein (C/EBP), epsilon	protein-coding	CEBPE	CCAAT/enhancer binding protein (C/EBP), epsilon	O	CCAAT/enhancer-binding protein epsilon|c/EBP epsilon	20130505
9606	1054	CEBPG	-	GPE1BP|IG/EBP-1	HGNC:1837|MIM:138972|Ensembl:ENSG00000153879|HPRD:00738|Vega:OTTHUMG00000180469	19	19q13.11	CCAAT/enhancer binding protein (C/EBP), gamma	protein-coding	CEBPG	CCAAT/enhancer binding protein (C/EBP), gamma	O	CCAAT/enhancer-binding protein gamma|c/EBP gamma	20130505
9606	1055	CECR	-	CES	HGNC:1838|MIM:115470	22	22pter-q11	cat eye syndrome chromosome region	unknown	CECR	cat eye syndrome chromosome region	O	-	20130226
9606	1056	CEL	-	BAL|BSDL|BSSL|CELL|CEase|FAP|FAPP|LIPA|MODY8	HGNC:1848|MIM:114840|Ensembl:ENSG00000170835|HPRD:07509|Vega:OTTHUMG00000020855	9	9q34.3	carboxyl ester lipase	protein-coding	CEL	carboxyl ester lipase	O	bile salt-activated lipase|bile salt-dependent lipase, oncofetal isoform|bile-salt-activated lipase|bucelipase|carboxyl ester hydrolase|carboxyl ester lipase (bile salt-stimulated lipase)|cholesterol esterase|fetoacinar pancreatic protein|lysophospholipase, pancreatic|pancreatic lysophospholipase|sterol esterase	20130505
9606	1057	CELP	-	CELL|cell1|cell2|cell3	HGNC:1849	9	9q34.3	carboxyl ester lipase pseudogene	pseudo	CELP	carboxyl ester lipase pseudogene	O	-	20130416
9606	1058	CENPA	-	CENP-A|CenH3	HGNC:1851|MIM:117139|Ensembl:ENSG00000115163|HPRD:00313|Vega:OTTHUMG00000097073	2	2p23.3	centromere protein A	protein-coding	CENPA	centromere protein A	O	centromere autoantigen A|centromere protein A, 17kDa|centromere-specific histone|histone H3-like centromeric protein A	20130505
9606	1059	CENPB	-	-	HGNC:1852|MIM:117140|Ensembl:ENSG00000125817|HPRD:00314|Vega:OTTHUMG00000031761	20	20p13	centromere protein B, 80kDa	protein-coding	CENPB	centromere protein B, 80kDa	O	CENP-B|centromere autoantigen B|major centromere autoantigen B	20130505
9606	1060	CENPC1	-	CENP-C|CENPC|MIF2|hcp-4	HGNC:1854|MIM:117141|Ensembl:ENSG00000145241|HPRD:00315|Vega:OTTHUMG00000160735	4	4q13.2	centromere protein C 1	protein-coding	CENPC1	centromere protein C 1	O	CENP-C 1|centromere autoantigen C|centromere autoantigen C1|interphase centromere complex protein 7	20130505
9606	1061	CENPC1P1	-	CENPC|CENPC2	HGNC:1855	12	12q21.33	centromere protein C 1 pseudogene 1	pseudo	CENPC1P1	centromere protein C 1 pseudogene 1	O	-	20130226
9606	1062	CENPE	-	CENP-E|KIF10|PPP1R61	HGNC:1856|MIM:117143|Ensembl:ENSG00000138778|HPRD:00316|Vega:OTTHUMG00000160980	4	4q24-q25	centromere protein E, 312kDa	protein-coding	CENPE	centromere protein E, 312kDa	O	Centromere autoantigen E (312kD)|centromere-associated protein E|kinesin family member 10|kinesin-related protein CENPE|protein phosphatase 1, regulatory subunit 61	20130505
9606	1063	CENPF	RP11-262H5.1	CENF|PRO1779|hcp-1	HGNC:1857|MIM:600236|Ensembl:ENSG00000117724|HPRD:02582|Vega:OTTHUMG00000036955	1	1q41	centromere protein F, 350/400kDa	protein-coding	CENPF	centromere protein F, 350/400kDa	O	AH antigen|CENP-F kinetochore protein|cell-cycle-dependent 350K nuclear protein|centromere protein F|centromere protein F, 350/400kDa (mitosin)|centromere protein F, 350/400ka (mitosin)|kinetochore protein CENPF|mitosin	20130505
9606	1066	CES1	-	ACAT|CE-1|CEH|CES2|HMSE|HMSE1|PCE-1|REH|SES1|TGH|hCE-1	HGNC:1863|MIM:114835|Ensembl:ENSG00000198848|HPRD:00268|Vega:OTTHUMG00000176718	16	16q22.2	carboxylesterase 1	protein-coding	CES1	carboxylesterase 1	O	acyl coenzyme A:cholesterol acyltransferase|acyl-coenzyme A:cholesterol acyltransferase|brain carboxylesterase hBr1|carboxylesterase 1 (monocyte/macrophage serine esterase 1)|carboxylesterase 2 (liver)|cholesteryl ester hydrolase|cocaine carboxylesterase|egasyn|human monocyte/macrophage serine esterase 1|liver carboxylesterase 1|methylumbelliferyl-acetate deacetylase 1|monocyte/macrophage serine …	20130505
9606	1068	CETN1	-	CEN1|CETN	HGNC:1866|MIM:603187|HPRD:04425	18	18p11.32	centrin, EF-hand protein, 1	protein-coding	CETN1	centrin, EF-hand protein, 1	O	EF-hand protein|calcium binding protein|caltractin|centrin-1	20130505
9606	1069	CETN2	-	CALT|CEN2	HGNC:1867|MIM:300006|HPRD:02051	X	Xq28	centrin, EF-hand protein, 2	protein-coding	CETN2	centrin, EF-hand protein, 2	O	caltractin (20kD calcium-binding protein)|centrin-2	20130505
9606	1070	CETN3	-	CEN3	HGNC:1868|MIM:602907|Ensembl:ENSG00000153140|HPRD:04216|Vega:OTTHUMG00000131326	5	5q14.3	centrin, EF-hand protein, 3	protein-coding	CETN3	centrin, EF-hand protein, 3	O	CDC31 yeast homolog|EF-hand superfamily member|centrin, EF-hand protein, 3 (CDC31 homolog, yeast)|centrin-3	20130505
9606	1071	CETP	-	BPIFF|HDLCQ10	HGNC:1869|MIM:118470|Ensembl:ENSG00000087237|HPRD:00325|Vega:OTTHUMG00000133279	16	16q21	cholesteryl ester transfer protein, plasma	protein-coding	CETP	cholesteryl ester transfer protein, plasma	O	BPI fold containing family F|cholesteryl ester transfer protein|lipid transfer protein I	20130505
9606	1072	CFL1	-	CFL	HGNC:1874|MIM:601442|Ensembl:ENSG00000172757|HPRD:03261	11	11q13	cofilin 1 (non-muscle)	protein-coding	CFL1	cofilin 1 (non-muscle)	O	18 kDa phosphoprotein|cofilin, non-muscle isoform|cofilin-1|p18	20130512
9606	1073	CFL2	-	NEM7	HGNC:1875|MIM:601443|Ensembl:ENSG00000165410|HPRD:03262|Vega:OTTHUMG00000029536	14	14q12	cofilin 2 (muscle)	protein-coding	CFL2	cofilin 2 (muscle)	O	cofilin, muscle isoform|cofilin-2|nemaline myopathy type 7	20130505
9606	1074	CFL1P5	-	CFLL1|CFLP5	HGNC:1877	5	5q13.2	cofilin 1 (non-muscle) pseudogene 5	pseudo	CFL1P5	cofilin 1 (non-muscle) pseudogene 5	O	-	20130226
9606	1075	CTSC	-	CPPI|DPP-I|DPP1|DPPI|HMS|JP|JPD|PALS|PDON1|PLS	HGNC:2528|MIM:602365|Ensembl:ENSG00000109861|HPRD:03841|Vega:OTTHUMG00000167290	11	11q14.2	cathepsin C	protein-coding	CTSC	cathepsin C	O	cathepsin J|dipeptidyl peptidase 1|dipeptidyl peptidase I|dipeptidyl transferase|dipeptidyl-peptidase I	20130505
9606	1080	CFTR	tcag7.78	ABC35|ABCC7|CF|CFTR/MRP|MRP7|TNR-CFTR|dJ760C5.1	HGNC:1884|MIM:602421|Ensembl:ENSG00000001626|HPRD:03883|Vega:OTTHUMG00000023076	7	7q31.2	cystic fibrosis transmembrane conductance regulator (ATP-binding cassette sub-family C, member 7)	protein-coding	CFTR	cystic fibrosis transmembrane conductance regulator (ATP-binding cassette sub-family C, member 7)	O	cAMP-dependent chloride channel|channel conductance-controlling ATPase|cystic fibrosis transmembrane conductance regulator	20130505
9606	1081	CGA	RP11-156F23.1	CG-ALPHA|FSHA|GPHA1|GPHa|HCG|LHA|TSHA	HGNC:1885|MIM:118850|Ensembl:ENSG00000135346|HPRD:00342|Vega:OTTHUMG00000015161	6	6q12-q21	glycoprotein hormones, alpha polypeptide	protein-coding	CGA	glycoprotein hormones, alpha polypeptide	O	FSH-alpha|LSH-alpha|TSH-alpha|anterior pituitary glycoprotein hormones common subunit alpha|choriogonadotropin alpha chain|chorionic gonadotrophin subunit alpha|chorionic gonadotropin, alpha polypeptide|follicle-stimulating hormone alpha chain|follicle-stimulating hormone alpha subunit|follitropin alpha chain|glycoprotein hormones alpha chain|luteinizing hormone alpha chain|lutropin alpha chain|t…	20130512
9606	1082	CGB	-	CGB3|CGB5|CGB7|CGB8|hCGB	HGNC:1886|MIM:118860|Ensembl:ENSG00000104827|HPRD:00343|Vega:OTTHUMG00000180605	19	19q13.32	chorionic gonadotropin, beta polypeptide	protein-coding	CGB	chorionic gonadotropin, beta polypeptide	O	CG-beta|choriogonadotropin subunit beta|chorionic gonadotrophin chain beta|chorionic gonadotropin beta 3 subunit|chorionic gonadotropin beta chain|chorionic gonadotropin beta subunit	20130505
9606	1083	CGF1	-	-	HGNC:1887|MIM:300082	X	Xp11.22-qter	cognitive function 1, social	unknown	CGF1	cognitive function 1, social	O	-	20130226
9606	1084	CEACAM3	-	CD66D|CEA|CGM1|W264|W282	HGNC:1815|MIM:609142|Ensembl:ENSG00000170956|HPRD:16450|Vega:OTTHUMG00000150142	19	19q13.2	carcinoembryonic antigen-related cell adhesion molecule 3	protein-coding	CEACAM3	carcinoembryonic antigen-related cell adhesion molecule 3	O	CD66d antigen|carcinoembryonic antigen CGM1|carcinoembryonic antigen gene family member 1|nonspecific cross-reacting antigen	20130330
9606	1085	CEACAMP5	-	CEACAM26P|CGM12	HGNC:1827	19	19q13.2	carcinoembryonic antigen-related cell adhesion molecule pseudogene 5	pseudo	CEACAMP5	carcinoembryonic antigen-related cell adhesion molecule pseudogene 5	O	-	20130226
9606	1086	CEACAMP11	-	CEACAM32P|CGM18	HGNC:1823	19	19q13.2	carcinoembryonic antigen-related cell adhesion molecule pseudogene 11	pseudo	CEACAMP11	carcinoembryonic antigen-related cell adhesion molecule pseudogene 11	O	-	20130226
9606	1087	CEACAM7	-	CEA|CGM2	HGNC:1819|Ensembl:ENSG00000007306|HPRD:07629|Vega:OTTHUMG00000151063	19	19q13.2	carcinoembryonic antigen-related cell adhesion molecule 7	protein-coding	CEACAM7	carcinoembryonic antigen-related cell adhesion molecule 7	O	carcinoembryonic antigen CGM2|carcinoembryonic antigen gene family member 2	20130226
9606	1088	CEACAM8	-	CD66b|CD67|CGM6|NCA-95	HGNC:1820|Ensembl:ENSG00000124469|HPRD:07630|Vega:OTTHUMG00000151124	19	19q13.2	carcinoembryonic antigen-related cell adhesion molecule 8	protein-coding	CEACAM8	carcinoembryonic antigen-related cell adhesion molecule 8	O	CD67 antigen|carcinoembryonic antigen CGM6|carcinoembryonic antigen gene family member 6|non-specific cross-reacting antigen NCA-95	20130505
9606	1089	CEACAM4	-	CGM7|CGM7_HUMAN|NCA	HGNC:1816|Ensembl:ENSG00000105352|HPRD:07628|Vega:OTTHUMG00000151065	19	19q13.2	carcinoembryonic antigen-related cell adhesion molecule 4	protein-coding	CEACAM4	carcinoembryonic antigen-related cell adhesion molecule 4	O	Nonspecific cross-reacting antigen (NCA)|carcinoembryonic antigen CGM7|carcinoembryonic antigen gene family member 7|non-specific cross-reacting antigen W236|nonspecific cross-reacting antigen W236	20130226
9606	1090	CEACAMP1	-	CEACAM22P|CGM8	HGNC:1821	19	19q13.2	carcinoembryonic antigen-related cell adhesion molecule pseudogene 1	pseudo	CEACAMP1	carcinoembryonic antigen-related cell adhesion molecule pseudogene 1	O	-	20130226
9606	1091	CEACAMP2	-	CEACAM23P|CGM9	HGNC:1824	19	19q13.2	carcinoembryonic antigen-related cell adhesion molecule pseudogene 2	pseudo	CEACAMP2	carcinoembryonic antigen-related cell adhesion molecule pseudogene 2	O	-	20130226
9606	1092	CEACAMP3	-	CEACAM24P|CGM10	HGNC:1825	19	19q13.2	carcinoembryonic antigen-related cell adhesion molecule pseudogene 3	pseudo	CEACAMP3	carcinoembryonic antigen-related cell adhesion molecule pseudogene 3	O	-	20130226
9606	1093	CEACAMP4	-	CEACAM25P|CGM11	HGNC:1826	19	19q13.2	carcinoembryonic antigen-related cell adhesion molecule pseudogene 4	pseudo	CEACAMP4	carcinoembryonic antigen-related cell adhesion molecule pseudogene 4	O	-	20130226
9606	1094	CEACAMP6	-	CEACAM27P|CGM13	HGNC:1828	19	19q13.2	carcinoembryonic antigen-related cell adhesion molecule pseudogene 6	pseudo	CEACAMP6	carcinoembryonic antigen-related cell adhesion molecule pseudogene 6	O	-	20130226
9606	1095	CEACAMP7	-	CEACAM28P|CGM14	HGNC:1829	19	19q13.2	carcinoembryonic antigen-related cell adhesion molecule pseudogene 7	pseudo	CEACAMP7	carcinoembryonic antigen-related cell adhesion molecule pseudogene 7	O	-	20130226
9606	1096	CEACAMP8	-	CEACAM29P|CGM15	HGNC:1830	19	19q13.2	carcinoembryonic antigen-related cell adhesion molecule pseudogene 8	pseudo	CEACAMP8	carcinoembryonic antigen-related cell adhesion molecule pseudogene 8	O	-	20130226
9606	1097	CEACAMP9	-	CEACAM30P|CGM16	HGNC:1831	19	19q13.2	carcinoembryonic antigen-related cell adhesion molecule pseudogene 9	pseudo	CEACAMP9	carcinoembryonic antigen-related cell adhesion molecule pseudogene 9	O	-	20130226
9606	1098	CEACAMP10	-	CEACAM31P|CGM17	HGNC:1822	19	19q13.2	carcinoembryonic antigen-related cell adhesion molecule pseudogene 10	pseudo	CEACAMP10	carcinoembryonic antigen-related cell adhesion molecule pseudogene 10	O	-	20130226
9606	1101	CHAD	-	SLRR4A	HGNC:1909|MIM:602178|Ensembl:ENSG00000136457|HPRD:03711|Vega:OTTHUMG00000162129	17	17q21.33	chondroadherin	protein-coding	CHAD	chondroadherin	O	cartilage leucine-rich protein|chondroadherin proteoglycan	20130504
9606	1102	RCBTB2	-	CHC1L	HGNC:1914|MIM:603524|Ensembl:ENSG00000136161|HPRD:04631|Vega:OTTHUMG00000016902	13	13q14.3	regulator of chromosome condensation (RCC1) and BTB (POZ) domain containing protein 2	protein-coding	RCBTB2	regulator of chromosome condensation (RCC1) and BTB (POZ) domain containing protein 2	O	CHC1-L|RCC1 and BTB domain-containing protein 2|RCC1-like G exchanging factor RLG|regulator of chromosome condensation and BTB domain containing protein 2|regulator of chromosome condensation and BTB domain-containing protein 2	20130505
9606	1103	CHAT	-	CHOACTASE|CMS1A|CMS1A2	HGNC:1912|MIM:118490|Ensembl:ENSG00000070748|HPRD:07510|Vega:OTTHUMG00000018198	10	10q11.2	choline O-acetyltransferase	protein-coding	CHAT	choline O-acetyltransferase	O	acetyl CoA:choline O-acetyltransferase|choline acetylase	20130504
9606	1104	RCC1	RP4-669K10.2	CHC1|RCC1-I|SNHG3-RCC1	HGNC:1913|MIM:179710|Ensembl:ENSG00000180198|HPRD:01559|Vega:OTTHUMG00000003645	1	1p36.1	regulator of chromosome condensation 1	protein-coding	RCC1	regulator of chromosome condensation 1	O	SNHG3-RCC1 readthrough transcript|cell cycle regulatory protein|guanine nucleotide-releasing protein|regulator of chromosome condensation	20130505
9606	1105	CHD1	-	-	HGNC:1915|MIM:602118|Ensembl:ENSG00000153922|HPRD:03668|Vega:OTTHUMG00000162744	5	5q15-q21	chromodomain helicase DNA binding protein 1	protein-coding	CHD1	chromodomain helicase DNA binding protein 1	O	ATP-dependent helicase CHD1|CHD-1|chromodomain-helicase-DNA-binding protein 1	20130505
9606	1106	CHD2	-	-	HGNC:1917|MIM:602119|Ensembl:ENSG00000173575|HPRD:03669|Vega:OTTHUMG00000149845	15	15q26	chromodomain helicase DNA binding protein 2	protein-coding	CHD2	chromodomain helicase DNA binding protein 2	O	ATP-dependent helicase CHD2|CHD-2|chromodomain-helicase-DNA-binding protein 2	20130505
9606	1107	CHD3	-	Mi-2a|Mi2-ALPHA|ZFH	HGNC:1918|MIM:602120|Ensembl:ENSG00000170004|HPRD:09071|Vega:OTTHUMG00000150427	17	17p13.1	chromodomain helicase DNA binding protein 3	protein-coding	CHD3	chromodomain helicase DNA binding protein 3	O	ATP-dependent helicase CHD3|CHD-3|chromodomain-helicase-DNA-binding protein 3|hZFH|mi-2 autoantigen 240 kDa protein|zinc finger helicase|zinc-finger helicase (Snf2-like)	20130505
9606	1108	CHD4	-	Mi-2b|Mi2-BETA	HGNC:1919|MIM:603277|Ensembl:ENSG00000111642|HPRD:04472|Vega:OTTHUMG00000169164	12	12p13	chromodomain helicase DNA binding protein 4	protein-coding	CHD4	chromodomain helicase DNA binding protein 4	O	ATP-dependent helicase CHD4|CHD-4|Mi-2 autoantigen 218 kDa protein|chromodomain-helicase-DNA-binding protein 4	20130505
9606	1109	AKR1C4	-	3-alpha-HSD|C11|CDR|CHDR|DD-4|DD4|HAKRA	HGNC:387|MIM:600451|Ensembl:ENSG00000198610|HPRD:07040|Vega:OTTHUMG00000017591	10	10p15.1	aldo-keto reductase family 1, member C4	protein-coding	AKR1C4	aldo-keto reductase family 1, member C4	O	3-alpha-HSD1|aldo-keto reductase family 1 member C4|chlordecone reductase; 3-alpha hydroxysteroid dehydrogenase, type I; dihydrodiol dehydrogenase 4|dihydrodiol dehydrogenase isozyme DD4|type I 3-alpha-hydroxysteroid dehydrogenase	20130504
9606	1110	CHE2	-	-	HGNC:1922|MIM:177500	2	2q33-q35	cholinesterase (serum) 2	protein-coding	CHE2	cholinesterase (serum) 2	O	-	20130226
9606	1111	CHEK1	-	CHK1	HGNC:1925|MIM:603078|Ensembl:ENSG00000149554|HPRD:04356|Vega:OTTHUMG00000165853	11	11q24.2	checkpoint kinase 1	protein-coding	CHEK1	checkpoint kinase 1	O	CHK1 checkpoint homolog|Checkpoint, S. pombe, homolog of, 1|Chk1-S|cell cycle checkpoint kinase|checkpoint kinase-1|serine/threonine-protein kinase Chk1	20130505
9606	1112	FOXN3	-	C14orf116|CHES1|PRO1635	HGNC:1928|MIM:602628|Ensembl:ENSG00000053254|HPRD:07533|Vega:OTTHUMG00000170898	14	14q31.3	forkhead box N3	protein-coding	FOXN3	forkhead box N3	O	checkpoint suppressor 1|forkhead box protein N3	20130512
9606	1113	CHGA	-	CGA	HGNC:1929|MIM:118910|Ensembl:ENSG00000100604|HPRD:07170|Vega:OTTHUMG00000171225	14	14q32	chromogranin A (parathyroid secretory protein 1)	protein-coding	CHGA	chromogranin A (parathyroid secretory protein 1)	O	SP-I|betagranin (N-terminal fragment of chromogranin A)|chromogranin-A|parathyroid secretory protein 1|pituitary secretory protein I	20130505
9606	1114	CHGB	-	SCG1	HGNC:1930|MIM:118920|Ensembl:ENSG00000089199|HPRD:07512|Vega:OTTHUMG00000031821	20	20pter-p12	chromogranin B (secretogranin 1)	protein-coding	CHGB	chromogranin B (secretogranin 1)	O	cgB|chromogranin-B|secretogranin B|secretogranin I|secretogranin-1|sgI	20130505
9606	1116	CHI3L1	-	ASRT7|CGP-39|GP-39|GP39|HC-gp39|HCGP-3P|YKL-40|YKL40|YYL-40|hCGP-39	HGNC:1932|MIM:601525|Ensembl:ENSG00000133048|HPRD:03314|Vega:OTTHUMG00000042122	1	1q32.1	chitinase 3-like 1 (cartilage glycoprotein-39)	protein-coding	CHI3L1	chitinase 3-like 1 (cartilage glycoprotein-39)	O	39 kDa synovial protein|cartilage glycoprotein 39|chitinase-3-like protein 1	20130505
9606	1117	CHI3L2	-	CHIL2|YKL-39|YKL39	HGNC:1933|MIM:601526|Ensembl:ENSG00000064886|HPRD:03315|Vega:OTTHUMG00000012174	1	1p13.3	chitinase 3-like 2	protein-coding	CHI3L2	chitinase 3-like 2	O	chitinase-3-like protein 2|chondrocyte protein 39	20130505
9606	1118	CHIT1	-	CHI3|CHIT|CHITD	HGNC:1936|MIM:600031|Ensembl:ENSG00000133063|HPRD:02494|Vega:OTTHUMG00000042126	1	1q31-q32	chitinase 1 (chitotriosidase)	protein-coding	CHIT1	chitinase 1 (chitotriosidase)	O	chitotriosidase-1|plasma methylumbelliferyl tetra-N-acetylchitotetraoside hydrolase	20130428
9606	1119	CHKA	-	CHK|CK|CKI|EK	HGNC:1937|MIM:118491|Ensembl:ENSG00000110721|HPRD:00327|Vega:OTTHUMG00000167424	11	11q13.2	choline kinase alpha	protein-coding	CHKA	choline kinase alpha	O	CHETK-alpha|ethanolamine kinase	20130508
9606	1120	CHKB	-	CHETK|CHKL|CK|CKB|CKEKB|EK|EKB|MDCMC	HGNC:1938|MIM:612395|Ensembl:ENSG00000100288|HPRD:07631|Vega:OTTHUMG00000150275	22	22q13.33	choline kinase beta	protein-coding	CHKB	choline kinase beta	O	choline kinase-like protein|choline/ethanolamine kinase|ethanolamine kinase beta	20130505
9606	1121	CHM	RP1-93L7.1	DXS540|GGTA|HSD-32|REP-1|TCD	HGNC:1940|MIM:300390|Ensembl:ENSG00000188419|HPRD:02312|HPRD:06563|Vega:OTTHUMG00000021937	X	Xq21.2	choroideremia (Rab escort protein 1)	protein-coding	CHM	choroideremia (Rab escort protein 1)	O	choroideremia protein|rab proteins geranylgeranyltransferase component A 1	20130505
9606	1122	CHML	-	REP2	HGNC:1941|MIM:118825|Ensembl:ENSG00000203668|HPRD:00341|Vega:OTTHUMG00000039690	1	1q42-qter	choroideremia-like (Rab escort protein 2)	protein-coding	CHML	choroideremia-like (Rab escort protein 2)	O	choroideraemia-like protein|choroideremia-like protein|rab proteins geranylgeranyltransferase component A 2	20130505
9606	1123	CHN1	-	ARHGAP2|CHN|DURS2|NC|RHOGAP2	HGNC:1943|MIM:118423|Ensembl:ENSG00000128656|HPRD:00319|Vega:OTTHUMG00000154225	2	2q31.1	chimerin 1	protein-coding	CHN1	chimerin 1	O	A-chimaerin|N-chimaerin|Rho GTPase-activating protein 2|a2-chimaerin|alpha-chimerin|chimaerin 1|chimerin (chimaerin) 1|n-chimerin	20130505
9606	1124	CHN2	-	ARHGAP3|BCH|CHN2-3|RHOGAP3	HGNC:1944|MIM:602857|Ensembl:ENSG00000106069|HPRD:04173|Vega:OTTHUMG00000023063	7	7p15.3	chimerin 2	protein-coding	CHN2	chimerin 2	O	beta-chimaerin|beta-chimerin|beta3-chimaerin|chimaerin 2|chimerin (chimaerin) 2|rho-GTPase-activating protein 3	20130505
9606	1125	CHR	-	-	HGNC:1945|MIM:118840	5	5q35	chromate resistance; sulfate transport	unknown	CHR	chromate resistance; sulfate transport	O	-	20130226
9606	1128	CHRM1	-	HM1|M1|M1R	HGNC:1950|MIM:118510|Ensembl:ENSG00000168539|HPRD:00338|Vega:OTTHUMG00000167765	11	11q13	cholinergic receptor, muscarinic 1	protein-coding	CHRM1	cholinergic receptor, muscarinic 1	O	acetylcholine receptor, muscarinic 1|muscarinic acetylcholine receptor M1	20130505
9606	1129	CHRM2	-	HM2	HGNC:1951|MIM:118493|Ensembl:ENSG00000181072|HPRD:00328|Vega:OTTHUMG00000155658	7	7q31-q35	cholinergic receptor, muscarinic 2	protein-coding	CHRM2	cholinergic receptor, muscarinic 2	O	7TM receptor|acetylcholine receptor, muscarinic 2|muscarinic M2 receptor|muscarinic acetylcholine receptor M2	20130505
9606	1130	LYST	-	CHS|CHS1	HGNC:1968|MIM:606897|Ensembl:ENSG00000143669|HPRD:06060|Vega:OTTHUMG00000040527	1	1q42.1-q42.2	lysosomal trafficking regulator	protein-coding	LYST	lysosomal trafficking regulator	O	Chediak-Higashi syndrome 1|beige homolog|lysosomal-trafficking regulator	20130505
9606	1131	CHRM3	-	EGBRS|HM3	HGNC:1952|MIM:118494|HPRD:00329	1	1q43	cholinergic receptor, muscarinic 3	protein-coding	CHRM3	cholinergic receptor, muscarinic 3	O	acetylcholine receptor, muscarinic 3|m3 muscarinic receptor|muscarinic acetylcholine receptor M3	20130505
9606	1132	CHRM4	-	HM4|M4R	HGNC:1953|MIM:118495|Ensembl:ENSG00000180720|HPRD:00330|Vega:OTTHUMG00000154371	11	11p12-p11.2	cholinergic receptor, muscarinic 4	protein-coding	CHRM4	cholinergic receptor, muscarinic 4	O	acetylcholine receptor, muscarinic 4|muscarinic acetylcholine receptor M4	20130504
9606	1133	CHRM5	-	HM5	HGNC:1954|MIM:118496|Ensembl:ENSG00000184984|HPRD:00331|Vega:OTTHUMG00000129369	15	15q26	cholinergic receptor, muscarinic 5	protein-coding	CHRM5	cholinergic receptor, muscarinic 5	O	acetylcholine receptor, muscarinic 5|muscarinic acetylcholine receptor M5	20130504
9606	1134	CHRNA1	-	ACHRA|ACHRD|CHRNA|CMS2A|FCCMS|SCCMS	HGNC:1955|MIM:100690|Ensembl:ENSG00000138435|HPRD:00007|Vega:OTTHUMG00000132357	2	2q31.1	cholinergic receptor, nicotinic, alpha 1 (muscle)	protein-coding	CHRNA1	cholinergic receptor, nicotinic, alpha 1 (muscle)	O	acetylcholine receptor subunit alpha|acetylcholine receptor, nicotinic, alpha 1 (muscle)|cholinergic receptor, nicotinic, alpha polypeptide 1 (muscle)|muscle nicotinic acetylcholine receptor|nicotinic acetylcholine receptor alpha subunit|nicotinic cholinergic receptor alpha 1	20130505
9606	1135	CHRNA2	-	-	HGNC:1956|MIM:118502|Ensembl:ENSG00000120903|HPRD:00332|Vega:OTTHUMG00000102083	8	8p21	cholinergic receptor, nicotinic, alpha 2 (neuronal)	protein-coding	CHRNA2	cholinergic receptor, nicotinic, alpha 2 (neuronal)	O	acetylcholine receptor, nicotinic, alpha 2 (neuronal)|cholinergic receptor, nicotinic, alpha polypeptide 2 (neuronal)|neuronal acetylcholine receptor subunit alpha-2	20130417
9606	1136	CHRNA3	-	LNCR2|NACHRA3|PAOD2	HGNC:1957|MIM:118503|Ensembl:ENSG00000080644|HPRD:07511|Vega:OTTHUMG00000143863	15	15q24	cholinergic receptor, nicotinic, alpha 3 (neuronal)	protein-coding	CHRNA3	cholinergic receptor, nicotinic, alpha 3 (neuronal)	O	cholinergic receptor, nicotinic, alpha polypeptide 3|neuronal acetylcholine receptor subunit alpha-3|neuronal nicotinic acetylcholine receptor, alpha3 subunit	20130505
9606	1137	CHRNA4	-	BFNC|EBN|EBN1|NACHR|NACHRA4|NACRA4	HGNC:1958|MIM:118504|Ensembl:ENSG00000101204|HPRD:00333|Vega:OTTHUMG00000033080	20	20q13.2-q13.3	cholinergic receptor, nicotinic, alpha 4 (neuronal)	protein-coding	CHRNA4	cholinergic receptor, nicotinic, alpha 4 (neuronal)	O	cholinergic receptor, nicotinic, alpha polypeptide 4|neuronal acetylcholine receptor subunit alpha-4|neuronal nicotinic acetylcholine receptor alpha-4 subunit	20130505
9606	1138	CHRNA5	-	LNCR2	HGNC:1959|MIM:118505|Ensembl:ENSG00000169684|HPRD:00334|Vega:OTTHUMG00000143858	15	15q24	cholinergic receptor, nicotinic, alpha 5 (neuronal)	protein-coding	CHRNA5	cholinergic receptor, nicotinic, alpha 5 (neuronal)	O	Cholinergic receptor, neuronal nicotinic, alpha polypeptide-5|acetylcholine receptor, nicotinic, alpha 5 (neuronal)|neuronal acetylcholine receptor subunit alpha-5|neuronal nicotinic acetylcholine receptor, alpha5 subunit	20130505
9606	1139	CHRNA7	-	CHRNA7-2|NACHRA7	HGNC:1960|MIM:118511|HPRD:00339	15	15q14	cholinergic receptor, nicotinic, alpha 7 (neuronal)	protein-coding	CHRNA7	cholinergic receptor, nicotinic, alpha 7 (neuronal)	O	a7 nicotinic acetylcholine receptor|alpha 7 neuronal nicotinic acetylcholine receptor|alpha-7 nicotinic cholinergic receptor subunit|cholinergic receptor, nicotinic, alpha polypeptide 7|neuronal acetylcholine receptor protein, alpha-7 chain|neuronal acetylcholine receptor subunit alpha-7	20130512
9606	1140	CHRNB1	-	ACHRB|CHRNB|CMS1D|CMS2A|SCCMS	HGNC:1961|MIM:100710|Ensembl:ENSG00000170175|HPRD:01156|Vega:OTTHUMG00000108139	17	17p13.1	cholinergic receptor, nicotinic, beta 1 (muscle)	protein-coding	CHRNB1	cholinergic receptor, nicotinic, beta 1 (muscle)	O	acetylcholine receptor subunit beta|acetylcholine receptor, nicotinic, beta 1 (muscle)|cholinergic receptor, nicotinic, beta polypeptide 1 (muscle)	20130505
9606	1141	CHRNB2	RP11-61L14.4	EFNL3|nAChRB2	HGNC:1962|MIM:118507|Ensembl:ENSG00000160716|HPRD:00335|Vega:OTTHUMG00000037262	1	1q21.3	cholinergic receptor, nicotinic, beta 2 (neuronal)	protein-coding	CHRNB2	cholinergic receptor, nicotinic, beta 2 (neuronal)	O	acetylcholine receptor, nicotinic, beta 2 (neuronal)|cholinergic receptor, nicotinic, beta polypeptide 2 (neuronal)|neuronal acetylcholine receptor subunit beta-2|neuronal nicotinic acetylcholine receptor beta 2	20130504
9606	1142	CHRNB3	-	-	HGNC:1963|MIM:118508|Ensembl:ENSG00000147432|HPRD:00336|Vega:OTTHUMG00000165262	8	8p11.2	cholinergic receptor, nicotinic, beta 3 (neuronal)	protein-coding	CHRNB3	cholinergic receptor, nicotinic, beta 3 (neuronal)	O	acetylcholine receptor, neuronal nicotinic, beta-3 subunit|acetylcholine receptor, nicotinic, beta 3 (neuronal)|cholinergic receptor, nicotinic, beta polypeptide 3|neuronal acetylcholine receptor subunit beta-3	20130316
9606	1143	CHRNB4	hCG_1731645	-	HGNC:1964|MIM:118509|Ensembl:ENSG00000117971|HPRD:00337|Vega:OTTHUMG00000143860	15	15q24	cholinergic receptor, nicotinic, beta 4 (neuronal)	protein-coding	CHRNB4	cholinergic receptor, nicotinic, beta 4 (neuronal)	O	acetylcholine receptor, nicotinic, beta 4 (neuronal)|cholinergic receptor, nicotinic, beta polypeptide 4|neuronal acetylcholine receptor subunit beta-4|neuronal nicotinic receptor beta 4 subunit	20130505
9606	1144	CHRND	-	ACHRD|CMS2A|FCCMS|SCCMS	HGNC:1965|MIM:100720|HPRD:01516	2	2q37.1	cholinergic receptor, nicotinic, delta (muscle)	protein-coding	CHRND	cholinergic receptor, nicotinic, delta (muscle)	O	acetylcholine receptor subunit delta|acetylcholine receptor, nicotinic, delta (muscle)|cholinergic receptor, nicotinic, delta polypeptide	20130505
9606	1145	CHRNE	-	ACHRE|CMS1D|CMS1E|CMS2A|FCCMS|SCCMS	HGNC:1966|MIM:100725|Ensembl:ENSG00000108556|HPRD:00008|Vega:OTTHUMG00000090778	17	17p13.2	cholinergic receptor, nicotinic, epsilon (muscle)	protein-coding	CHRNE	cholinergic receptor, nicotinic, epsilon (muscle)	O	AchR epsilon subunit|acetylcholine receptor subunit epsilon|acetylcholine receptor, nicotinic, epsilon (muscle)|cholinergic receptor, nicotinic, epsilon polypeptide	20130505
9606	1146	CHRNG	-	ACHRG	HGNC:1967|MIM:100730|Ensembl:ENSG00000196811|HPRD:00009|Vega:OTTHUMG00000153327	2	2q37.1	cholinergic receptor, nicotinic, gamma (muscle)	protein-coding	CHRNG	cholinergic receptor, nicotinic, gamma (muscle)	O	acetylcholine receptor subunit gamma|acetylcholine receptor, muscle, gamma subunit|acetylcholine receptor, nicotinic, gamma (muscle)|cholinergic receptor, nicotinic, gamma polypeptide	20130505
9606	1147	CHUK	-	IKBKA|IKK-alpha|IKK1|IKKA|NFKBIKA|TCF16	HGNC:1974|MIM:600664|Ensembl:ENSG00000213341|HPRD:02811|Vega:OTTHUMG00000018899	10	10q24-q25	conserved helix-loop-helix ubiquitous kinase	protein-coding	CHUK	conserved helix-loop-helix ubiquitous kinase	O	I-kappa-B kinase 1|I-kappa-B kinase-alpha|IKK-a kinase|IkB kinase alpha subunit|Nuclear factor NFkappaB inhibitor kinase alpha|TCF-16|inhibitor of nuclear factor kappa-B kinase subunit alpha|transcription factor 16	20130505
9606	1149	CIDEA	-	CIDE-A	HGNC:1976|MIM:604440|HPRD:08380	18	18p11.21|18	cell death-inducing DFFA-like effector a	protein-coding	CIDEA	cell death-inducing DFFA-like effector a	O	cell death activator CIDE-A	20130505
9606	1152	CKB	-	B-CK|CKBB	HGNC:1991|MIM:123280|Ensembl:ENSG00000166165|HPRD:00423|Vega:OTTHUMG00000171786	14	14q32	creatine kinase, brain	protein-coding	CKB	creatine kinase, brain	O	creatine kinase B chain|creatine kinase B-type|creatine kinase-B	20130512
9606	1153	CIRBP	-	CIRP	HGNC:1982|MIM:602649|Ensembl:ENSG00000099622|HPRD:08375|Vega:OTTHUMG00000180145	19	19p13.3	cold inducible RNA binding protein	protein-coding	CIRBP	cold inducible RNA binding protein	O	A18 hnRNP|cold inducible RNA-binding protein|cold-inducible RNA-binding protein|glycine-rich RNA binding protein|glycine-rich RNA-binding protein CIRP	20130505
9606	1154	CISH	-	BACTS2|CIS|CIS-1|G18|SOCS	HGNC:1984|MIM:602441|Ensembl:ENSG00000114737|HPRD:03897|Vega:OTTHUMG00000156853	3	3p21.3	cytokine inducible SH2-containing protein	protein-coding	CISH	cytokine inducible SH2-containing protein	O	cytokine-inducible SH2-containing protein|cytokine-inducible inhibitor of signaling type 1B|suppressor of cytokine signaling	20130505
9606	1155	TBCB	-	CG22|CKAP1|CKAPI	HGNC:1989|MIM:601303|Ensembl:ENSG00000105254|HPRD:03196|Vega:OTTHUMG00000048143	19	19q13.11-q13.12	tubulin folding cofactor B	protein-coding	TBCB	tubulin folding cofactor B	O	cytoskeleton associated protein 1|cytoskeleton-associated protein 1|cytoskeleton-associated protein CKAPI|tubulin-folding cofactor B|tubulin-specific chaperone B	20130505
9606	1156	CKBE	-	-	HGNC:1992|MIM:123270	14	14q32	creatine kinase, ectopic expression	unknown	CKBE	creatine kinase, ectopic expression	O	-	20130226
9606	1157	CKBP1	-	-	HGNC:1993	16	16q11.2	creatine kinase B pseudogene 1	pseudo	CKBP1	creatine kinase B pseudogene 1	O	-	20130226
9606	1158	CKM	-	CKMM|M-CK	HGNC:1994|MIM:123310|Ensembl:ENSG00000104879|HPRD:00426|Vega:OTTHUMG00000181782	19	19q13.32	creatine kinase, muscle	protein-coding	CKM	creatine kinase, muscle	O	creatine kinase M chain|creatine kinase M-type	20130505
9606	1159	CKMT1B	-	CKMT|CKMT1|UMTCK	HGNC:1995|MIM:123290|Ensembl:ENSG00000237289|HPRD:00424	15	15q15	creatine kinase, mitochondrial 1B	protein-coding	CKMT1B	creatine kinase, mitochondrial 1B	O	U-MtCK|acidic-type mitochondrial creatine kinase|creatine kinase U-type, mitochondrial|creatine kinase, mitochondrial 1 (ubiquitous)|mia-CK|ubiquitous mitochondrial creatine kinase	20130505
9606	1160	CKMT2	-	SMTCK	HGNC:1996|MIM:123295|Ensembl:ENSG00000131730|HPRD:00425|Vega:OTTHUMG00000119013	5	5q13.3	creatine kinase, mitochondrial 2 (sarcomeric)	protein-coding	CKMT2	creatine kinase, mitochondrial 2 (sarcomeric)	O	S-MtCK|basic-type mitochondrial creatine kinase|creatine kinase S-type, mitochondrial|mib-CK|sarcomeric mitochondrial creatine kinase	20130505
9606	1161	ERCC8	-	CKN1|CSA|UVSS2	HGNC:3439|MIM:609412|Ensembl:ENSG00000049167|HPRD:07523|Vega:OTTHUMG00000097741	5	5q12.1	excision repair cross-complementing rodent repair deficiency, complementation group 8	protein-coding	ERCC8	excision repair cross-complementing rodent repair deficiency, complementation group 8	O	Cockayne syndrome WD-repeat protein CSA|DNA excision repair protein ERCC-8|cockayne syndrome WD repeat protein CSA	20130505
9606	1163	CKS1B	RP11-307C12.6	CKS1|PNAS-16|PNAS-18|ckshs1	HGNC:19083|MIM:116900|Ensembl:ENSG00000173207|HPRD:00299|Vega:OTTHUMG00000037413	1	1q21.2	CDC28 protein kinase regulatory subunit 1B	protein-coding	CKS1B	CDC28 protein kinase regulatory subunit 1B	O	CDC2-associated protein CKS1|CDC28 protein kinase 1|CDC28 protein kinase 1B|CKS-1|NB4 apoptosis/differentiation related protein|PNAS-143|cell division control protein CKS1|cyclin-dependent kinases regulatory subunit 1	20130505
9606	1164	CKS2	RP11-8C21.2	CKSHS2	HGNC:2000|MIM:116901|Ensembl:ENSG00000123975|HPRD:00300|Vega:OTTHUMG00000020180	9	9q22	CDC28 protein kinase regulatory subunit 2	protein-coding	CKS2	CDC28 protein kinase regulatory subunit 2	O	CDC28 protein kinase 2|CKS-2|CKS1(S. cerevisiae Cdc28/Cdc2 kinase subunit) homolog-2|cyclin-dependent kinases regulatory subunit 2	20130505
9606	1165	SCAR2	-	CLA1|CPD3	HGNC:2002|MIM:213200	9	9q34.3	spinocerebellar ataxia, autosomal recessive 2	unknown	SCAR2	spinocerebellar ataxia, autosomal recessive 2	O	-	20130226
9606	1166	SCAX1	-	CLA2|OPCA	HGNC:2003|MIM:302500	X	Xp11.21-q21.3	spinocerebellar ataxia, X-linked 1	unknown	SCAX1	spinocerebellar ataxia, X-linked 1	O	-	20130226
9606	1167	CLA3	-	CPD1|SCAR6	HGNC:2004|MIM:608029	20	20q11-q13	cerebellar ataxia 3 (cerebellar parenchyma disorder 1)	unknown	CLA3	cerebellar ataxia 3 (cerebellar parenchyma disorder 1)	O	-	20130226
9606	1173	AP2M1	-	AP50|CLAPM1|mu2	HGNC:564|MIM:601024|Ensembl:ENSG00000161203|HPRD:03014|Vega:OTTHUMG00000156822	3	3q28	adaptor-related protein complex 2, mu 1 subunit	protein-coding	AP2M1	adaptor-related protein complex 2, mu 1 subunit	O	AP-2 complex subunit mu|AP-2 mu 2 chain|AP-2 mu chain|HA2 50 kDA subunit|adapter-related protein complex 2 mu subunit|adaptin-mu2|adaptor protein complex AP-2 subunit mu|clathrin adaptor complex AP2, mu subunit|clathrin assembly protein complex 2 medium chain|clathrin coat adaptor protein AP50|clathrin coat assembly protein AP50|clathrin coat-associated protein AP50|clathrin-associated/assembly/a…	20130505
9606	1174	AP1S1	-	AP19|CLAPS1|MEDNIK|SIGMA1A|WUGSC:H_DJ0747G18.2	HGNC:559|MIM:603531|Ensembl:ENSG00000106367|HPRD:04635|Vega:OTTHUMG00000157103	7	7q22.1	adaptor-related protein complex 1, sigma 1 subunit	protein-coding	AP1S1	adaptor-related protein complex 1, sigma 1 subunit	O	AP-1 complex subunit sigma-1A|HA1 19 kDa subunit|adapter-related protein complex 1 sigma-1A subunit|clathrin assembly protein complex 1 sigma-1A small chain|clathrin coat assembly protein AP19|clathrin-associated/assembly/adaptor protein, small 1 (19kD)|golgi adaptor HA1/AP1 adaptin sigma-1A subunit|sigma1A subunit of AP-1 clathrin adaptor complex|sigma1A-adaptin	20130505
9606	1175	AP2S1	-	AP17|AP17-DELTA|CLAPS2|HHC3	HGNC:565|MIM:602242|Ensembl:ENSG00000042753|HPRD:03762|Vega:OTTHUMG00000183437	19	19q13.2-q13.3	adaptor-related protein complex 2, sigma 1 subunit	protein-coding	AP2S1	adaptor-related protein complex 2, sigma 1 subunit	O	AP-2 complex subunit sigma|HA2 17 kDa subunit|adaptor protein complex AP-2 subunit sigma|clathrin assembly protein 2 small chain|clathrin coat assembly protein AP17|clathrin coat-associated protein AP17|clathrin-associated/assembly/adaptor protein, small 2 (17kD)|plasma membrane adaptor AP-2 17 kDa protein|sigma2-adaptin	20130505
9606	1176	AP3S1	-	CLAPS3|Sigma3A	HGNC:2013|MIM:601507|HPRD:03298	5	5q22	adaptor-related protein complex 3, sigma 1 subunit	protein-coding	AP3S1	adaptor-related protein complex 3, sigma 1 subunit	O	AP-3 complex sigma-3A subunit|AP-3 complex subunit sigma-1|AP-3 complex subunit sigma-3A|adapter-related protein complex 3 sigma-1 subunit|clathrin-associated/assembly/adapter protein, small 3|clathrin-associated/assembly/adaptor protein, small 3 (22kD)|sigma-3A-adaptin|sigma-adaptin 3a|sigma3A-adaptin	20130505
9606	1178	CLC	-	GAL10|Gal-10|LGALS10|LGALS10A|LPPL_HUMAN	HGNC:2014|MIM:153310|Ensembl:ENSG00000105205|HPRD:08351|Vega:OTTHUMG00000183144	19	19q13.1	Charcot-Leyden crystal protein	protein-coding	CLC	Charcot-Leyden crystal protein	O	eosinophil lysophospholipase|galectin 10|galectin-10|lysolecithin acylhydrolase	20130226
9606	1179	CLCA1	-	CACC|CACC1|CLCRG1|CaCC-1|GOB5|hCLCA1|hCaCC-1	HGNC:2015|MIM:603906|Ensembl:ENSG00000016490|HPRD:04880|Vega:OTTHUMG00000010254	1	1p22.3	chloride channel accessory 1	protein-coding	CLCA1	chloride channel accessory 1	O	CLCA family member 1, chloride channel regulator|calcium-activated chloride channel family member 1|calcium-activated chloride channel protein 1|calcium-activated chloride channel regulator 1|calcium-dependent chloride channel-1|chloride channel regulator 1|chloride channel, calcium activated, family member 1	20130505
9606	1180	CLCN1	-	CLC1	HGNC:2019|MIM:118425|Ensembl:ENSG00000188037|HPRD:00320|Vega:OTTHUMG00000152695	7	7q35	chloride channel, voltage-sensitive 1	protein-coding	CLCN1	chloride channel, voltage-sensitive 1	O	chloride channel 1, skeletal muscle|chloride channel protein 1|chloride channel protein, skeletal muscle|clC-1	20130512
9606	1181	CLCN2	-	CIC-2|CLC2|ECA2|ECA3|EGI11|EGI3|EGMA|EJM6|EJM8|clC-2	HGNC:2020|MIM:600570|Ensembl:ENSG00000114859|HPRD:02782|Vega:OTTHUMG00000156747	3	3q27-q28	chloride channel, voltage-sensitive 2	protein-coding	CLCN2	chloride channel, voltage-sensitive 2	O	chloride channel 2|chloride channel protein 2	20130505
9606	1182	CLCN3	-	CLC3|ClC-3	HGNC:2021|MIM:600580|Ensembl:ENSG00000109572|HPRD:02785|Vega:OTTHUMG00000160973	4	4q33	chloride channel, voltage-sensitive 3	protein-coding	CLCN3	chloride channel, voltage-sensitive 3	O	H(+)/Cl(-) exchange transporter 3|chloride channel 3|chloride channel protein 3|chloride transporter ClC-3	20130505
9606	1183	CLCN4	-	CLC4|ClC-4|ClC-4A	HGNC:2022|MIM:302910|Ensembl:ENSG00000073464|HPRD:02362|Vega:OTTHUMG00000021125	X	Xp22.3	chloride channel, voltage-sensitive 4	protein-coding	CLCN4	chloride channel, voltage-sensitive 4	O	H(+)/Cl(-) exchange transporter 4|chloride channel 4|chloride channel protein 4|chloride transporter ClC-4	20130416
9606	1184	CLCN5	-	CLC5|CLCK2|ClC-5|DENTS|NPHL1|NPHL2|XLRH|XRN|hCIC-K2	HGNC:2023|MIM:300008|Ensembl:ENSG00000171365|HPRD:02053|Vega:OTTHUMG00000021514	X	Xp11.23-p11.22	chloride channel, voltage-sensitive 5	protein-coding	CLCN5	chloride channel, voltage-sensitive 5	O	H(+)/Cl(-) exchange transporter 5|chloride channel 5|chloride transporter ClC-5|voltage-gated chloride ion channel CLCN5	20130505
9606	1185	CLCN6	RP5-934G17.1	CLC-6	HGNC:2024|MIM:602726|Ensembl:ENSG00000011021|HPRD:04102|Vega:OTTHUMG00000002299	1	1p36	chloride channel, voltage-sensitive 6	protein-coding	CLCN6	chloride channel, voltage-sensitive 6	O	chloride transport protein 6	20130505
9606	1186	CLCN7	LA16c-390E6.1	CLC-7|CLC7|OPTA2|OPTB4|PPP1R63	HGNC:2025|MIM:602727|Ensembl:ENSG00000103249|HPRD:04103|Vega:OTTHUMG00000044467	16	16p13	chloride channel, voltage-sensitive 7	protein-coding	CLCN7	chloride channel, voltage-sensitive 7	O	H(+)/Cl(-) exchange transporter 7|chloride channel 7 alpha subunit|chloride channel protein 7|protein phosphatase 1, regulatory subunit 63	20130505
9606	1187	CLCNKA	RP11-5P18.7	CLCK1|ClC-K1|hClC-Ka	HGNC:2026|MIM:602024|Ensembl:ENSG00000186510|HPRD:03608|Vega:OTTHUMG00000009529	1	1p36	chloride channel, voltage-sensitive Ka	protein-coding	CLCNKA	chloride channel, voltage-sensitive Ka	O	chloride channel Ka|chloride channel protein ClC-Ka|chloride channel, kidney, A	20130416
9606	1188	CLCNKB	RP11-5P18.8	CLCKB|ClC-K2|ClC-Kb	HGNC:2027|MIM:602023|Ensembl:ENSG00000184908|HPRD:03607|Vega:OTTHUMG00000009530	1	1p36	chloride channel, voltage-sensitive Kb	protein-coding	CLCNKB	chloride channel, voltage-sensitive Kb	O	chloride channel protein ClC-Kb|chloride channel, kidney, B	20130512
9606	1191	CLU	AAG4	APO-J|APOJ|CLI|CLU1|CLU2|KUB1|NA1/NA2|SGP-2|SGP2|SP-40|TRPM-2|TRPM2	HGNC:2095|MIM:185430|Ensembl:ENSG00000120885|HPRD:01706|Vega:OTTHUMG00000102114	8	8p21-p12	clusterin	protein-coding	CLU	clusterin	O	aging-associated protein 4|apolipoprotein J|complement cytolysis inhibitor|complement lysis inhibitor|complement-associated protein SP-40,40|ku70-binding protein 1|sulfated glycoprotein 2|testosterone-repressed prostate message 2	20130505
9606	1192	CLIC1	DADB-110M10.1	G6|NCC27	HGNC:2062|MIM:602872|Ensembl:ENSG00000213719|HPRD:04188|Vega:OTTHUMG00000031103	6	6p21.3	chloride intracellular channel 1	protein-coding	CLIC1	chloride intracellular channel 1	O	RNCC protein|chloride channel ABP|chloride intracellular channel protein 1|hRNCC|nuclear chloride ion channel 27|nuclear chloride ion channel protein|p64CLCP|regulatory nuclear chloride ion channel protein	20130505
9606	1193	CLIC2	RP13-228J13.7	CLIC2b|MRXS32|XAP121	HGNC:2063|MIM:300138|Ensembl:ENSG00000155962|HPRD:02139|Vega:OTTHUMG00000022660	X	Xq28	chloride intracellular channel 2	protein-coding	CLIC2	chloride intracellular channel 2	O	chloride intracellular channel protein 2	20130505
9606	1195	CLK1	-	CLK|CLK/STY|STY	HGNC:2068|MIM:601951|Ensembl:ENSG00000013441|HPRD:09058|Vega:OTTHUMG00000132784	2	2q33	CDC-like kinase 1	protein-coding	CLK1	CDC-like kinase 1	O	CDC28/CDC2-like kinase|dual specificity protein kinase CLK1|protein tyrosine kinase STY	20130505
9606	1196	CLK2	-	hCLK2	HGNC:2069|MIM:602989|Ensembl:ENSG00000176444|HPRD:04289|Vega:OTTHUMG00000035873	1	1q21	CDC-like kinase 2	protein-coding	CLK2	CDC-like kinase 2	O	CLK kinase|dual specificity protein kinase CLK2	20130505
9606	1197	CLK2P	tcag7.1259	-	HGNC:2070	7	7p15.3	CDC-like kinase 2, pseudogene	pseudo	CLK2P	CDC-like kinase 2, pseudogene	O	-	20130226
9606	1198	CLK3	-	PHCLK3|PHCLK3/152	HGNC:2071|MIM:602990|Ensembl:ENSG00000179335|HPRD:04290|Vega:OTTHUMG00000141320	15	15q24	CDC-like kinase 3	protein-coding	CLK3	CDC-like kinase 3	O	dual specificity protein kinase CLK3	20130505
9606	1200	TPP1	GIG1	CLN2|LPIC|TPP-1	HGNC:2073|MIM:607998|Ensembl:ENSG00000166340|HPRD:06415|Vega:OTTHUMG00000133404	11	11p15	tripeptidyl peptidase I	protein-coding	TPP1	tripeptidyl peptidase I	O	cell growth-inhibiting gene 1 protein|growth-inhibiting protein 1|lysosomal pepstatin insensitive protease|tripeptidyl aminopeptidase|tripeptidyl-peptidase 1	20130505
9606	1201	CLN3	-	BTS|JNCL	HGNC:2074|MIM:607042|Ensembl:ENSG00000188603|HPRD:08450|Vega:OTTHUMG00000097024	16	16p12.1	ceroid-lipofuscinosis, neuronal 3	protein-coding	CLN3	ceroid-lipofuscinosis, neuronal 3	O	batten disease protein|battenin	20130505
9606	1203	CLN5	-	NCL	HGNC:2076|MIM:608102|HPRD:07619	13	13q21.1-q32	ceroid-lipofuscinosis, neuronal 5	protein-coding	CLN5	ceroid-lipofuscinosis, neuronal 5	O	ceroid-lipofuscinosis neuronal protein 5	20130505
9606	1204	CLNS1AP1	-	CLNS1B|ICln	HGNC:2081	6	6p12-q13	chloride channel, nucleotide-sensitive, 1A pseudogene 1	pseudo	CLNS1AP1	chloride channel, nucleotide-sensitive, 1A pseudogene 1	O	-	20130226
9606	1207	CLNS1A	-	CLCI|CLNS1B|ICln	HGNC:2080|MIM:602158|Ensembl:ENSG00000074201|HPRD:03694|Vega:OTTHUMG00000165143	11	11q13.5-q14	chloride channel, nucleotide-sensitive, 1A	protein-coding	CLNS1A	chloride channel, nucleotide-sensitive, 1A	O	chloride channel regulatory protein|chloride channel, nucleotide sensitive 1A|chloride conductance regulatory protein ICln|chloride ion current inducer protein|i(Cln)|methylosome subunit pICln|reticulocyte pICln|reticulocyte protein ICln	20130505
9606	1208	CLPS	-	-	HGNC:2085|MIM:120105|Ensembl:ENSG00000137392|HPRD:00356|Vega:OTTHUMG00000014578	6	6p21.31	colipase, pancreatic	protein-coding	CLPS	colipase, pancreatic	O	colipase|pancreatic colipase preproprotein	20130504
9606	1209	CLPTM1	-	-	HGNC:2087|MIM:604783|Ensembl:ENSG00000104853|Vega:OTTHUMG00000180849	19	19q13.3	cleft lip and palate associated transmembrane protein 1	protein-coding	CLPTM1	cleft lip and palate associated transmembrane protein 1	O	cleft lip and palate transmembrane protein 1	20130505
9606	1211	CLTA	-	LCA	HGNC:2090|MIM:118960|Ensembl:ENSG00000122705|HPRD:00351|Vega:OTTHUMG00000019896	9	9p13	clathrin, light chain A	protein-coding	CLTA	clathrin, light chain A	O	clathrin light chain A|clathrin, light polypeptide (Lca)	20130505
9606	1212	CLTB	-	LCB	HGNC:2091|MIM:118970|Ensembl:ENSG00000175416|HPRD:00352|Vega:OTTHUMG00000130662	5	5q35	clathrin, light chain B	protein-coding	CLTB	clathrin, light chain B	O	clathrin light chain B|clathrin, light chain (Lcb)|clathrin, light polypeptide (Lcb)	20130505
9606	1213	CLTC	-	CHC|CHC17|CLH-17|CLTCL2|Hc	HGNC:2092|MIM:118955|Ensembl:ENSG00000141367|HPRD:00350|Vega:OTTHUMG00000134279	17	17q11-qter	clathrin, heavy chain (Hc)	protein-coding	CLTC	clathrin, heavy chain (Hc)	O	clathrin heavy chain 1|clathrin heavy chain on chromosome 17|clathrin, heavy polypeptide (Hc)|clathrin, heavy polypeptide-like 2	20130505
9606	1215	CMA1	-	CYH|MCT1|chymase	HGNC:2097|MIM:118938|Ensembl:ENSG00000092009|HPRD:00346|Vega:OTTHUMG00000140181	14	14q11.2	chymase 1, mast cell	protein-coding	CMA1	chymase 1, mast cell	O	alpha-chymase|chymase|chymase 1 preproprotein transcript E|chymase 1 preproprotein transcript I|chymase, heart|chymase, mast cell|mast cell protease I	20130504
9606	1218	CMD1B	-	CMPD1|FDC	HGNC:2102|MIM:600884	9	9q13-q22	cardiomyopathy, dilated 1B (autosomal dominant)	unknown	CMD1B	cardiomyopathy, dilated 1B (autosomal dominant)	O	-	20130226
9606	1219	CMD1C	-	CMPD3	HGNC:2103|MIM:601493	10	10q21-q23	cardiomyopathy, dilated 1C (autosomal dominant)	unknown	CMD1C	cardiomyopathy, dilated 1C (autosomal dominant)	O	-	20130226
9606	1222	CMD1F	-	CDCD3|LGMD1D|LGMD1E	HGNC:2106|MIM:602067	6	6q23	cardiomyopathy, dilated 1F (autosomal dominant)	unknown	CMD1F	cardiomyopathy, dilated 1F (autosomal dominant)	O	-	20130226
9606	1224	CMD2A	-	-	HGNC:2110	-	-	cardiomyopathy, dilated 2A (autosomal recessive)	unknown	CMD2A	cardiomyopathy, dilated 2A (autosomal recessive)	O	-	20130226
9606	1230	CCR1	-	CD191|CKR-1|CKR1|CMKBR1|HM145|MIP1aR|SCYAR1	HGNC:1602|MIM:601159|Ensembl:ENSG00000163823|HPRD:03101|Vega:OTTHUMG00000133451	3	3p21	chemokine (C-C motif) receptor 1	protein-coding	CCR1	chemokine (C-C motif) receptor 1	O	C-C CKR-1|C-C chemokine receptor type 1|CC-CKR-1|CCR-1|LD78 receptor|MIP-1alpha-R|RANTES receptor|RANTES-R|macrophage inflammatory protein 1-alpha receptor	20130505
9606	1232	CCR3	-	CC-CKR-3|CD193|CKR3|CMKBR3	HGNC:1604|MIM:601268|Ensembl:ENSG00000183625|HPRD:03167|Vega:OTTHUMG00000133484	3	3p21.3	chemokine (C-C motif) receptor 3	protein-coding	CCR3	chemokine (C-C motif) receptor 3	O	C-C CKR-3|C-C chemokine receptor type 3|CC chemokine receptor 3|CCR-3|b-chemokine receptor|eosinophil CC chemokine receptor 3|eosinophil eotaxin receptor	20130505
9606	1233	CCR4	-	CC-CKR-4|CD194|CKR4|CMKBR4|ChemR13|HGCN:14099|K5-5	HGNC:1605|MIM:604836|HPRD:05324	3	3p24	chemokine (C-C motif) receptor 4	protein-coding	CCR4	chemokine (C-C motif) receptor 4	O	C-C CKR-4|C-C chemokine receptor type 4|CCR-4|chemokine (C-C) receptor 4	20130505
9606	1234	CCR5	-	CC-CKR-5|CCCKR5|CCR-5|CD195|CKR-5|CKR5|CMKBR5|IDDM22	HGNC:1606|MIM:601373|Ensembl:ENSG00000160791|HPRD:03223	3	3p21.31	chemokine (C-C motif) receptor 5 (gene/pseudogene)	protein-coding	CCR5	chemokine (C-C motif) receptor 5 (gene/pseudogene)	O	C-C chemokine receptor type 5|C-C motif chemokine receptor 5 A159A|HIV-1 fusion coreceptor|chemokine receptor CCR5|chemr13	20130505
9606	1235	CCR6	-	BN-1|C-C CKR-6|CC-CKR-6|CCR-6|CD196|CKR-L3|CKRL3|CMKBR6|DCR2|DRY6|GPR29|GPRCY4|STRL22	HGNC:1607|MIM:601835|Ensembl:ENSG00000112486|HPRD:03498|Vega:OTTHUMG00000016015	6	6q27	chemokine (C-C motif) receptor 6	protein-coding	CCR6	chemokine (C-C motif) receptor 6	O	C-C chemokine receptor type 6|G protein-coupled receptor 29|G-protein coupled receptor 29|LARC receptor|chemokine (C-C) receptor 6|chemokine receptor-like 3|seven-transmembrane receptor, lymphocyte, 22	20130505
9606	1236	CCR7	-	BLR2|CD197|CDw197|CMKBR7|EBI1	HGNC:1608|MIM:600242|Ensembl:ENSG00000126353|HPRD:02588|Vega:OTTHUMG00000133375	17	17q12-q21.2	chemokine (C-C motif) receptor 7	protein-coding	CCR7	chemokine (C-C motif) receptor 7	O	C-C CKR-7|C-C chemokine receptor type 7|CC chemokine receptor 7|CC-CKR-7|CCR-7|EBV-induced G protein-coupled receptor 1|EBV-induced G-protein coupled receptor 1|Epstein-Barr virus induced G-protein coupled receptor|Epstein-Barr virus induced gene 1|MIP-3 beta receptor|chemokine (C-C) receptor 7|epstein-Barr virus-induced G-protein coupled receptor 1|lymphocyte-specific G protein-coupled peptide r…	20130512
9606	1237	CCR8	-	CC-CKR-8|CCR-8|CDw198|CKRL1|CMKBR8|CMKBRL2|CY6|GPRCY6|TER1	HGNC:1609|MIM:601834|Ensembl:ENSG00000179934|HPRD:03497|Vega:OTTHUMG00000131290	3	3p22	chemokine (C-C motif) receptor 8	protein-coding	CCR8	chemokine (C-C motif) receptor 8	O	C-C chemokine receptor type 8|CC chemokine receptor 8|CC chemokine receptor CHEMR1|CC-chemokine receptor chemr1|chemokine (C-C) receptor 8|chemokine (C-C) receptor-like 2|chemokine receptor-like 1	20130504
9606	1238	CCBP2	-	CCR10|CCR9|CMKBR9|D6|hD6	HGNC:1565|MIM:602648|Ensembl:ENSG00000144648|HPRD:09095|Vega:OTTHUMG00000133040	3	3p21.3	chemokine binding protein 2	protein-coding	CCBP2	chemokine binding protein 2	O	C-C chemokine receptor D6|CC-chemokine-binding receptor JAB61|chemokine (C-C motif) receptor 9|chemokine (C-C) receptor 9|chemokine receptor CCR-10|chemokine receptor CCR-9|chemokine receptor D6|chemokine-binding protein 2|chemokine-binding protein D6	20130505
9606	1240	CMKLR1	-	CHEMERINR|ChemR23|DEZ|RVER1	HGNC:2121|MIM:602351|Ensembl:ENSG00000174600|HPRD:03829|Vega:OTTHUMG00000169576	12	12q24.1	chemokine-like receptor 1	protein-coding	CMKLR1	chemokine-like receptor 1	O	G-protein coupled receptor ChemR23|G-protein coupled receptor DEZ|chemokine receptor-like 1|orphan G-protein coupled receptor, Dez|resolvin E1 receptor	20130416
9606	1241	LTB4R	-	BLT1|BLTR|CMKRL1|GPR16|LTB4R1|LTBR1|P2RY7|P2Y7	HGNC:6713|MIM:601531|Ensembl:ENSG00000213903|HPRD:03320|Vega:OTTHUMG00000029346	14	14q11.2-q12	leukotriene B4 receptor	protein-coding	LTB4R	leukotriene B4 receptor	O	G protein-coupled receptor 16|G-protein coupled receptor 16|LTB4-R 1|LTB4-R1|P2Y purinoceptor 7|chemoattractant receptor-like 1|chemokine receptor-like 1|leukotriene B4 receptor 1|purinergic receptor P2Y, G-protein coupled, 7	20130505
9606	1243	CMM	-	CMM1|DNS|FAMMM|MLM	HGNC:2124|MIM:155600	1	1p36	cutaneous malignant melanoma/dysplastic nevus	unknown	CMM	cutaneous malignant melanoma/dysplastic nevus	O	-	20130226
9606	1244	ABCC2	RP11-114F7.2	ABC30|CMOAT|DJS|MRP2|cMRP	HGNC:53|MIM:601107|Ensembl:ENSG00000023839|HPRD:03065|Vega:OTTHUMG00000018895	10	10q24	ATP-binding cassette, sub-family C (CFTR/MRP), member 2	protein-coding	ABCC2	ATP-binding cassette, sub-family C (CFTR/MRP), member 2	O	ATP-binding cassette sub-family C member 2|canalicular multidrug resistance protein|canalicular multispecific organic anion transporter 1|multidrug resistance-associated protein 2	20130512
9606	1245	CMR1A	-	-	HGNC:2126	-	-	cardiomyopathy, restrictive 1A (autosomal dominant)	unknown	CMR1A	cardiomyopathy, restrictive 1A (autosomal dominant)	O	-	20130226
9606	1246	CMR2A	-	-	HGNC:2127	-	-	cardiomyopathy, restrictive 2A (autosomal recessive)	unknown	CMR2A	cardiomyopathy, restrictive 2A (autosomal recessive)	O	-	20130226
9606	1247	CMR3A	-	-	HGNC:2128	X	Xpter-qter	cardiomyopathy, restrictive 3A (X-linked)	unknown	CMR3A	cardiomyopathy, restrictive 3A (X-linked)	O	-	20130226
9606	1253	CMTX2	-	-	HGNC:2137|MIM:302801	X	Xp22	Charcot-Marie-Tooth neuropathy, X-linked 2 (recessive)	unknown	CMTX2	Charcot-Marie-Tooth neuropathy, X-linked 2 (recessive)	O	-	20130226
9606	1254	CMTX3	-	-	HGNC:2138|MIM:302802	X	-	Charcot-Marie-Tooth neuropathy, X-linked 3 (dominant)	unknown	CMTX3	Charcot-Marie-Tooth neuropathy, X-linked 3 (dominant)	O	-	20130226
9606	1255	CNA1	-	-	HGNC:2139|MIM:121400	12	12q	cornea plana 1 (autosomal dominant)	unknown	CNA1	cornea plana 1 (autosomal dominant)	O	-	20130226
9606	1257	CNC	-	CNC2	HGNC:2141|MIM:605244	2	2p16	Carney complex, multiple neoplasia and lentiginosis	unknown	CNC	Carney complex, multiple neoplasia and lentiginosis	O	-	20130226
9606	1258	CNGB1	-	CNCG2|CNCG3L|CNCG4|CNG4|CNGB1B|GAR1|GARP|RCNC2|RCNCb|RCNCbeta|RP45	HGNC:2151|MIM:600724|Ensembl:ENSG00000070729|HPRD:07204|Vega:OTTHUMG00000154810	16	16q13	cyclic nucleotide gated channel beta 1	protein-coding	CNGB1	cyclic nucleotide gated channel beta 1	O	CNG channel beta-1|CNG-4|cyclic nucleotide-gated cation channel 4|cyclic nucleotide-gated cation channel beta-1|cyclic nucleotide-gated cation channel gamma|cyclic nucleotide-gated cation channel modulatory subunit|cyclic nucleotide-gated channel beta-1|glutamic acid-rich protein|glutamic-acid-rich protein	20130505
9606	1259	CNGA1	-	CNCG|CNCG1|CNG-1|CNG1|RCNC1|RCNCa|RCNCalpha|RP49	HGNC:2148|MIM:123825|Ensembl:ENSG00000198515|HPRD:00445|Vega:OTTHUMG00000160668	4	4p12	cyclic nucleotide gated channel alpha 1	protein-coding	CNGA1	cyclic nucleotide gated channel alpha 1	O	CNG channel alpha-1|cGMP-gated cation channel alpha-1|cyclic nucleotide-gated cation channel 1|cyclic nucleotide-gated channel alpha-1|cyclic nucleotide-gated channel, photoreceptor|interleukin-1 homologue|rod photoreceptor cGMP-gated channel subunit alpha	20130505
9606	1260	CNGA2	-	CNCA|CNCA1|CNG2|OCNC1|OCNCALPHA|OCNCa	HGNC:2149|MIM:300338|Ensembl:ENSG00000183862|HPRD:08946|Vega:OTTHUMG00000024173	X	Xq27	cyclic nucleotide gated channel alpha 2	protein-coding	CNGA2	cyclic nucleotide gated channel alpha 2	O	CNG channel alpha-2|CNG-2|cyclic nucleotide-gated cation channel 2|cyclic nucleotide-gated channel alpha-2|cyclic nucleotide-gated olfactory channel|cyclic-nucleotide-gated cation channel 2|cyclic-nucleotide-gated olfactory channel	20130416
9606	1261	CNGA3	-	ACHM2|CCNC1|CCNCa|CCNCalpha|CNCG3|CNG3	HGNC:2150|MIM:600053|Ensembl:ENSG00000144191|HPRD:02504|Vega:OTTHUMG00000130561	2	2q11.2	cyclic nucleotide gated channel alpha 3	protein-coding	CNGA3	cyclic nucleotide gated channel alpha 3	O	CNG channel alpha-3|CNG-3|cone photoreceptor cGMP-gated channel alpha subunit|cone photoreceptor cGMP-gated channel subunit alpha|cyclic nucleotide-gated cation channel alpha-3|cyclic nucleotide-gated channel alpha-3	20130505
9606	1262	CNGA4	-	CNCA2|CNG-4|CNG4|CNG5|CNGB2|OCNC2|OCNCBETA|OCNCb	HGNC:2152|MIM:609472|Ensembl:ENSG00000132259|HPRD:18724|Vega:OTTHUMG00000165379	11	11p15.4	cyclic nucleotide gated channel alpha 4	protein-coding	CNGA4	cyclic nucleotide gated channel alpha 4	O	CNG channel alpha-4|cyclic nucleotide gated channel beta 2|cyclic nucleotide-gated cation channel alpha-4	20130226
9606	1263	PLK3	RP11-269F19.6	CNK|FNK|PRK	HGNC:2154|MIM:602913|Ensembl:ENSG00000173846|HPRD:04222|Vega:OTTHUMG00000008491	1	1p34.1	polo-like kinase 3	protein-coding	PLK3	polo-like kinase 3	O	FGF-inducible kinase|PLK-3|cytokine-inducible kinase|cytokine-inducible serine/threonine-protein kinase|proliferation-related kinase|serine/threonine-protein kinase PLK3	20130505
9606	1264	CNN1	-	SMCC|Sm-Calp	HGNC:2155|MIM:600806|Ensembl:ENSG00000130176|HPRD:02884|Vega:OTTHUMG00000182033	19	19p13.2-p13.1	calponin 1, basic, smooth muscle	protein-coding	CNN1	calponin 1, basic, smooth muscle	O	basic calponin|calponin H1, smooth muscle|calponin-1|calponins, basic	20130505
9606	1265	CNN2	-	-	HGNC:2156|MIM:602373|Ensembl:ENSG00000064666|HPRD:03847|Vega:OTTHUMG00000172729	19	19p13.3	calponin 2	protein-coding	CNN2	calponin 2	O	calponin H2, smooth muscle|calponin-2|neutral calponin	20130505
9606	1266	CNN3	-	-	HGNC:2157|MIM:602374|Ensembl:ENSG00000117519|HPRD:03848|Vega:OTTHUMG00000010783	1	1p22-p21	calponin 3, acidic	protein-coding	CNN3	calponin 3, acidic	O	calponin, acidic isoform|calponin-3|dJ639P13.2.2 (acidic calponin 3)	20130505
9606	1267	CNP	-	CNP1	HGNC:2158|MIM:123830|HPRD:00448	17	17q21	2',3'-cyclic nucleotide 3' phosphodiesterase	protein-coding	CNP	2',3'-cyclic nucleotide 3' phosphodiesterase	O	2', 3' cyclic nucleotide 3' phosphohydrolase|2',3'-cyclic-nucleotide 3'-phosphodiesterase|CNPase	20130505
9606	1268	CNR1	RP1-23D17.1	CANN6|CB-R|CB1|CB1A|CB1K5|CB1R|CNR	HGNC:2159|MIM:114610|Ensembl:ENSG00000118432|HPRD:00259|Vega:OTTHUMG00000015184	6	6q14-q15	cannabinoid receptor 1 (brain)	protein-coding	CNR1	cannabinoid receptor 1 (brain)	O	cannabinoid receptor 1|central cannabinoid receptor	20130505
9606	1269	CNR2	RP11-4M23.1	CB-2|CB2|CX5	HGNC:2160|MIM:605051|HPRD:05444	1	1p36.11	cannabinoid receptor 2 (macrophage)	protein-coding	CNR2	cannabinoid receptor 2 (macrophage)	O	cannabinoid receptor 2|testis-dominant CNR2 isoform CB2	20130226
9606	1270	CNTF	-	HCNTF	HGNC:2169|MIM:118945|Ensembl:ENSG00000242689|HPRD:00347|Vega:OTTHUMG00000137476	11	11q12.2	ciliary neurotrophic factor	protein-coding	CNTF	ciliary neurotrophic factor	O	-	20130505
9606	1271	CNTFR	RP11-296L22.1	-	HGNC:2170|MIM:118946|Ensembl:ENSG00000122756|HPRD:00348|Vega:OTTHUMG00000019821	9	9p13	ciliary neurotrophic factor receptor	protein-coding	CNTFR	ciliary neurotrophic factor receptor	O	CNTF receptor subunit alpha|CNTFR-alpha|ciliary neurotrophic factor receptor subunit alpha	20130505
9606	1272	CNTN1	-	F3|GP135	HGNC:2171|MIM:600016|Ensembl:ENSG00000018236|HPRD:07189|Vega:OTTHUMG00000169362	12	12q11-q12	contactin 1	protein-coding	CNTN1	contactin 1	O	contactin-1|glycoprotein gP135|neural cell surface protein F3	20130505
9606	1275	COD2	-	CORDX2	HGNC:2182|MIM:300085	X	Xq27	cone dystrophy 2 (X-linked)	unknown	COD2	cone dystrophy 2 (X-linked)	O	-	20130226
9606	1277	COL1A1	-	OI4	HGNC:2197|MIM:120150|Ensembl:ENSG00000108821|HPRD:00362|Vega:OTTHUMG00000148674	17	17q21.33	collagen, type I, alpha 1	protein-coding	COL1A1	collagen, type I, alpha 1	O	alpha-1 type I collagen|collagen alpha 1 chain type I|collagen alpha-1(I) chain|collagen alpha-1(I) chain preproprotein|collagen of skin, tendon and bone, alpha-1 chain|pro-alpha-1 collagen type 1	20130512
9606	1278	COL1A2	-	OI4	HGNC:2198|MIM:120160|Ensembl:ENSG00000164692|HPRD:00363|Vega:OTTHUMG00000148675	7	7q22.1	collagen, type I, alpha 2	protein-coding	COL1A2	collagen, type I, alpha 2	O	alpha 2(I)-collagen|alpha-2 type I collagen|collagen I, alpha-2 polypeptide|collagen alpha-2(I) chain|collagen of skin, tendon and bone, alpha-2 chain|type I procollagen	20130512
9606	1279	COL1AR	-	COLR	HGNC:2199|MIM:120340	15	-	collagen, type I, alpha, receptor	unknown	COL1AR	collagen, type I, alpha, receptor	O	-	20130226
9606	1280	COL2A1	-	ANFH|AOM|COL11A3|SEDC	HGNC:2200|MIM:120140|Ensembl:ENSG00000139219|HPRD:00361|Vega:OTTHUMG00000149896	12	12q13.11	collagen, type II, alpha 1	protein-coding	COL2A1	collagen, type II, alpha 1	O	alpha-1 type II collagen|cartilage collagen|chondrocalcin|collagen II, alpha-1 polypeptide|collagen alpha-1(II) chain	20130505
9606	1281	COL3A1	-	EDS4A	HGNC:2201|MIM:120180|Ensembl:ENSG00000168542|HPRD:00365|Vega:OTTHUMG00000132648	2	2q31	collagen, type III, alpha 1	protein-coding	COL3A1	collagen, type III, alpha 1	O	Ehlers-Danlos syndrome type IV, autosomal dominant|alpha1 (III) collagen|collagen alpha-1(III) chain|collagen, fetal	20130505
9606	1282	COL4A1	RP11-472K17.2	HANAC|ICH|POREN1|arresten	HGNC:2202|MIM:120130|Ensembl:ENSG00000187498|HPRD:00359|Vega:OTTHUMG00000017342	13	13q34	collagen, type IV, alpha 1	protein-coding	COL4A1	collagen, type IV, alpha 1	O	COL4A1 NC1 domain|collagen IV, alpha-1 polypeptide|collagen alpha-1(IV) chain|collagen of basement membrane, alpha-1 chain	20130505
9606	1283	CTD	-	-	HGNC:2497|MIM:300216	-	-	Coats disease	unknown	CTD	Coats disease	O	-	20130505
9606	1284	COL4A2	RP11-90L1.2	ICH|POREN2	HGNC:2203|MIM:120090|Ensembl:ENSG00000134871|HPRD:00355|Vega:OTTHUMG00000017344	13	13q34	collagen, type IV, alpha 2	protein-coding	COL4A2	collagen, type IV, alpha 2	O	canstatin|collagen alpha-2(IV) chain	20130505
9606	1285	COL4A3	-	-	HGNC:2204|MIM:120070|Ensembl:ENSG00000169031|HPRD:00354|Vega:OTTHUMG00000149891	2	2q36-q37	collagen, type IV, alpha 3 (Goodpasture antigen)	protein-coding	COL4A3	collagen, type IV, alpha 3 (Goodpasture antigen)	O	collagen IV, alpha-3 polypeptide|collagen alpha-3(IV) chain|tumstatin	20130505
9606	1286	COL4A4	-	CA44	HGNC:2206|MIM:120131|Ensembl:ENSG00000081052|HPRD:00360|Vega:OTTHUMG00000149892	2	2q35-q37	collagen, type IV, alpha 4	protein-coding	COL4A4	collagen, type IV, alpha 4	O	Collagen IV, alpha-4 polypeptide|collagen alpha-4(IV) chain|collagen of basement membrane, alpha-4 chain	20130505
9606	1287	COL4A5	RP6-24A23.5	ASLN|ATS|CA54	HGNC:2207|MIM:303630|Ensembl:ENSG00000188153|HPRD:02363|Vega:OTTHUMG00000022182	X	Xq22	collagen, type IV, alpha 5	protein-coding	COL4A5	collagen, type IV, alpha 5	O	collagen IV, alpha-5 polypeptide|collagen alpha-5(IV) chain|collagen of basement membrane, alpha-5 chain|dA149D17.3|dA24A23.1	20130505
9606	1288	COL4A6	RP5-889N15.4	CXDELq22.3|DELXq22.3	HGNC:2208|MIM:303631|Ensembl:ENSG00000197565|HPRD:02364|Vega:OTTHUMG00000022179	X	Xq22	collagen, type IV, alpha 6	protein-coding	COL4A6	collagen, type IV, alpha 6	O	collagen IV, alpha-6 polypeptide|collagen alpha-6(IV) chain|collagen of basement membrane, alpha-6|dJ889N15.4 (Collagen Alpha 6(IV))	20130505
9606	1289	COL5A1	RP11-263F14.1	-	HGNC:2209|MIM:120215|Ensembl:ENSG00000130635|HPRD:00368|Vega:OTTHUMG00000020891	9	9q34.2-q34.3	collagen, type V, alpha 1	protein-coding	COL5A1	collagen, type V, alpha 1	O	collagen alpha-1(V) chain	20130512
9606	1290	COL5A2	-	-	HGNC:2210|MIM:120190|Ensembl:ENSG00000204262|HPRD:00366|Vega:OTTHUMG00000149842	2	2q14-q32	collagen, type V, alpha 2	protein-coding	COL5A2	collagen, type V, alpha 2	O	AB collagen|collagen alpha-2(V) chain|collagen, fetal membrane, A polypeptide|type V preprocollagen alpha 2 chain	20130504
9606	1291	COL6A1	-	OPLL	HGNC:2211|MIM:120220|Ensembl:ENSG00000142156|HPRD:00370|Vega:OTTHUMG00000090440	21	21q22.3	collagen, type VI, alpha 1	protein-coding	COL6A1	collagen, type VI, alpha 1	O	alpha 1 (VI) chain (61 AA)|collagen VI, alpha-1 polypeptide|collagen alpha-1(VI) chain	20130505
9606	1292	COL6A2	-	PP3610	HGNC:2212|MIM:120240|Ensembl:ENSG00000142173|HPRD:02110|Vega:OTTHUMG00000090489	21	21q22.3	collagen, type VI, alpha 2	protein-coding	COL6A2	collagen, type VI, alpha 2	O	collagen VI, alpha-2 polypeptide|collagen alpha-2(VI) chain|human mRNA for collagen VI alpha-2 C-terminal globular domain	20130505
9606	1293	COL6A3	-	-	HGNC:2213|MIM:120250|Ensembl:ENSG00000163359|HPRD:00371|Vega:OTTHUMG00000150020	2	2q37	collagen, type VI, alpha 3	protein-coding	COL6A3	collagen, type VI, alpha 3	O	collagen VI, alpha-3 polypeptide|collagen alpha-3(VI) chain	20130504
9606	1294	COL7A1	-	EBD1|EBDCT|EBR1	HGNC:2214|MIM:120120|Ensembl:ENSG00000114270|HPRD:00358|Vega:OTTHUMG00000133541	3	3p21.1	collagen, type VII, alpha 1	protein-coding	COL7A1	collagen, type VII, alpha 1	O	LC collagen|collagen VII, alpha-1 polypeptide|collagen alpha-1(VII) chain|long-chain collagen	20130505
9606	1295	COL8A1	-	C3orf7	HGNC:2215|MIM:120251|Ensembl:ENSG00000144810|HPRD:00372	3	3q12.3	collagen, type VIII, alpha 1	protein-coding	COL8A1	collagen, type VIII, alpha 1	O	cell proliferation-inducing protein 41|collagen VIII, alpha-1 polypeptide|collagen alpha-1(VIII) chain|endothelial collagen|smooth muscle cell-expressed and macrophage conditioned medium-induced protein smag-64	20130505
9606	1296	COL8A2	RP4-665N4.3	FECD|FECD1|PPCD|PPCD2	HGNC:2216|MIM:120252|Ensembl:ENSG00000171812|HPRD:08347|Vega:OTTHUMG00000007665	1	1p34.2	collagen, type VIII, alpha 2	protein-coding	COL8A2	collagen, type VIII, alpha 2	O	collagen VIII, alpha-2 polypeptide|collagen alpha-2(VIII) chain|dJ665N4.1 (collagen type VIII alpha 2)|endothelial collagen	20130505
9606	1297	COL9A1	RP1-138F4.2	DJ149L1.1.2|EDM6|MED|STL4	HGNC:2217|MIM:120210|Ensembl:ENSG00000112280|HPRD:00367|Vega:OTTHUMG00000014988	6	6q13	collagen, type IX, alpha 1	protein-coding	COL9A1	collagen, type IX, alpha 1	O	alpha-1(IX) collagen chain|cartilage-specific short collagen|collagen IX, alpha-1 polypeptide|collagen alpha-1(IX) chain	20130508
9606	1298	COL9A2	-	DJ39G22.4|EDM2|MED|STL5	HGNC:2218|MIM:120260|Ensembl:ENSG00000049089|HPRD:00373|Vega:OTTHUMG00000005761	1	1p33-p32	collagen, type IX, alpha 2	protein-coding	COL9A2	collagen, type IX, alpha 2	O	alpha 2 type IX collagen|collagen IX, alpha-2 polypeptide|collagen alpha-2(IX) chain	20130512
9606	1299	COL9A3	RP5-885L7.6	DJ885L7.4.1|EDM3|IDD|MED	HGNC:2219|MIM:120270|Ensembl:ENSG00000092758|HPRD:00374|Vega:OTTHUMG00000032938	20	20q13.3	collagen, type IX, alpha 3	protein-coding	COL9A3	collagen, type IX, alpha 3	O	collagen IX, alpha-3 polypeptide|collagen alpha-3(IX) chain|collagen type IX proteoglycan	20130505
9606	1300	COL10A1	RP1-136O14.2	-	HGNC:2185|MIM:120110|Ensembl:ENSG00000123500|HPRD:00357	6	6q21-q22	collagen, type X, alpha 1	protein-coding	COL10A1	collagen, type X, alpha 1	O	Schmid metaphyseal chondrodysplasia|collagen X, alpha-1 polypeptide|collagen alpha-1(X) chain	20130506
9606	1301	COL11A1	-	CO11A1|COLL6|STL2	HGNC:2186|MIM:120280|Ensembl:ENSG00000060718|HPRD:00375|Vega:OTTHUMG00000010872	1	1p21	collagen, type XI, alpha 1	protein-coding	COL11A1	collagen, type XI, alpha 1	O	collagen XI, alpha-1 polypeptide|collagen alpha-1(XI) chain	20130505
9606	1302	COL11A2	DADB-100D22.2	DFNA13|DFNB53|FBCG2|HKE5|PARP|STL3	HGNC:2187|MIM:120290|Ensembl:ENSG00000204248|HPRD:00376|HPRD:09049|Vega:OTTHUMG00000031036	6	6p21.3	collagen, type XI, alpha 2	protein-coding	COL11A2	collagen, type XI, alpha 2	O	collagen alpha-2(XI) chain|pro-a2 chain of collagen type XI	20130505
9606	1303	COL12A1	RP1-238D15.1	BA209D8.1|COL12A1L|DJ234P15.1	HGNC:2188|MIM:120320|Ensembl:ENSG00000111799|HPRD:00377|HPRD:00378|Vega:OTTHUMG00000015051	6	6q12-q13	collagen, type XII, alpha 1	protein-coding	COL12A1	collagen, type XII, alpha 1	O	collagen alpha-1(XII) chain|collagen type XII proteoglycan	20130505
9606	1305	COL13A1	-	COLXIIIA1	HGNC:2190|MIM:120350|Ensembl:ENSG00000197467|HPRD:00383|Vega:OTTHUMG00000018394	10	10q22	collagen, type XIII, alpha 1	protein-coding	COL13A1	collagen, type XIII, alpha 1	O	collagen alpha-1(XIII) chain	20130416
9606	1306	COL15A1	-	-	HGNC:2192|MIM:120325|Ensembl:ENSG00000204291|HPRD:00380|Vega:OTTHUMG00000020351	9	9q21-q22	collagen, type XV, alpha 1	protein-coding	COL15A1	collagen, type XV, alpha 1	O	collagen XV, alpha-1 polypeptide|collagen alpha-1(XV) chain|collagen type XV proteoglycan|endostatin-XV|restin	20130511
9606	1307	COL16A1	FP1572	447AA	HGNC:2193|MIM:120326|Ensembl:ENSG00000084636|HPRD:00381|Vega:OTTHUMG00000003883	1	1p35-p34	collagen, type XVI, alpha 1	protein-coding	COL16A1	collagen, type XVI, alpha 1	O	alpha 1 type XVI collagen|collagen XVI, alpha-1 polypeptide|collagen alpha-1(XVI) chain	20130505
9606	1308	COL17A1	RP11-16H23.2	BA16H23.2|BP180|BPA-2|BPAG2|LAD-1	HGNC:2194|MIM:113811|Ensembl:ENSG00000065618|HPRD:00223|Vega:OTTHUMG00000018998	10	10q24.3	collagen, type XVII, alpha 1	protein-coding	COL17A1	collagen, type XVII, alpha 1	O	180 kDa bullous pemphigoid antigen 2|alpha 1 type XVII collagen|bA16H23.2 (collagen, type XVII, alpha 1 (BP180))|bullous pemphigoid antigen 2 (180kD)|collagen XVII, alpha-1 polypeptide|collagen alpha-1(XVII) chain	20130505
9606	1310	COL19A1	RP1-138F4.1	COL9A1L|D6S228E	HGNC:2196|MIM:120165|HPRD:00364	6	6q12-q13	collagen, type XIX, alpha 1	protein-coding	COL19A1	collagen, type XIX, alpha 1	O	a1 chain of type XIX collagen|collagen XIX, alpha-1 polypeptide|collagen alpha 1 (Y) chain|collagen alpha-1(XIX) chain|collagen alpha-1(Y) chain	20130505
9606	1311	COMP	-	EDM1|EPD1|MED|PSACH|THBS5	HGNC:2227|MIM:600310|Ensembl:ENSG00000105664|HPRD:02632|Vega:OTTHUMG00000169318	19	19p13.1	cartilage oligomeric matrix protein	protein-coding	COMP	cartilage oligomeric matrix protein	O	TSP5|cartilage oligomeric matrix protein (pseudoachondroplasia, epiphyseal dysplasia 1, multiple)|cartilage oligomeric matrix protein(pseudoachondroplasia, epiphyseal dysplasia 1, multiple)|pseudoachondroplasia (epiphyseal dysplasia 1, multiple)|thrombospondin-5	20130512
9606	1312	COMT	-	-	HGNC:2228|MIM:116790|Ensembl:ENSG00000093010|HPRD:00284|Vega:OTTHUMG00000150529	22	22q11.21	catechol-O-methyltransferase	protein-coding	COMT	catechol-O-methyltransferase	O	catechol O-methyltransferase	20130512
9606	1313	COP	-	CLTO	HGNC:2229	-	-	clathrin-ordered protein	protein-coding	COP	clathrin-ordered protein	O	-	20130505
9606	1314	COPA	-	HEP-COP	HGNC:2230|MIM:601924|Ensembl:ENSG00000122218|HPRD:03564|Vega:OTTHUMG00000033111	1	1q23.2	coatomer protein complex, subunit alpha	protein-coding	COPA	coatomer protein complex, subunit alpha	O	HEPCOP|alpha coat protein|alpha-COP|alpha-coat protein|coatomer subunit alpha|proxenin|xenin	20130505
9606	1315	COPB1	MSTP026	COPB	HGNC:2231|MIM:600959|Ensembl:ENSG00000129083|HPRD:02981|Vega:OTTHUMG00000165824	11	11p15.2	coatomer protein complex, subunit beta 1	protein-coding	COPB1	coatomer protein complex, subunit beta 1	O	beta coat protein|beta-coat protein|beta-cop|coatomer subunit beta	20130505
9606	1316	KLF6	RP11-184A2.1	BCD1|CBA1|COPEB|CPBP|GBF|PAC1|ST12|ZF9	HGNC:2235|MIM:602053|Ensembl:ENSG00000067082|HPRD:03632|Vega:OTTHUMG00000017567	10	10p15	Kruppel-like factor 6	protein-coding	KLF6	Kruppel-like factor 6	O	B-cell-derived protein 1|GC-rich binding factor|GC-rich sites-binding factor GBF|Krueppel-like factor 6|Kruppel-like zinc finger protein Zf9|core promoter element binding protein|core promoter element-binding protein|proto-oncogene BCD1|protooncogene B-cell derived 1|suppression of tumorigenicity 12 (prostate)|suppressor of tumorigenicity 12 protein|transcription factor Zf9	20130512
9606	1317	SLC31A1	RP11-110L1.1	COPT1|CTR1	HGNC:11016|MIM:603085|Ensembl:ENSG00000136868|HPRD:04362|Vega:OTTHUMG00000020519	9	9q32	solute carrier family 31 (copper transporters), member 1	protein-coding	SLC31A1	solute carrier family 31 (copper transporters), member 1	O	copper transport 1 homolog|copper transporter 1|high affinity copper uptake protein 1|solute carrier family 31 member 1	20130505
9606	1318	SLC31A2	RP11-9H12.2	COPT2|CTR2|hCTR2	HGNC:11017|MIM:603088|Ensembl:ENSG00000136867|HPRD:04365|Vega:OTTHUMG00000021037	9	9q32	solute carrier family 31 (copper transporters), member 2	protein-coding	SLC31A2	solute carrier family 31 (copper transporters), member 2	O	copper transporter 2|probable low affinity copper uptake protein 2|solute carrier family 31 member 2	20130505
9606	1319	CORD1	-	CORD|CRD1	HGNC:2245|MIM:600624	18	18q21.1-q21.3	cone rod dystrophy 1 (autosomal dominant)	unknown	CORD1	cone rod dystrophy 1 (autosomal dominant)	O	-	20130505
9606	1321	CORD4	-	-	HGNC:2247	17	17q	cone rod dystrophy 4	unknown	CORD4	cone rod dystrophy 4	O	-	20130226
9606	1325	CORT	UNQ307/PRO350	CST-14|CST-17|CST-29	HGNC:2257|MIM:602784|Ensembl:ENSG00000241563|HPRD:04150|Vega:OTTHUMG00000001906	1	1p36.22	cortistatin	protein-coding	CORT	cortistatin	O	cortistatin-14|cortistatin-17|cortistatin-29|prepro-cortistatin|preprocortistatin	20130505
9606	1326	MAP3K8	RP11-449I17.8	COT|EST|ESTF|MEKK8|TPL2|Tpl-2|c-COT	HGNC:6860|MIM:191195|Ensembl:ENSG00000107968|HPRD:01863|Vega:OTTHUMG00000017889	10	10p11.23	mitogen-activated protein kinase kinase kinase 8	protein-coding	MAP3K8	mitogen-activated protein kinase kinase kinase 8	O	Ewing sarcoma transformant|cot (cancer Osaka thyroid) oncogene|proto-oncogene c-Cot|proto-oncogene serine/threoine protein kinase|tumor progression locus 2	20130505
9606	1327	COX4I1	-	COX4|COX4-1|COXIV	HGNC:2265|MIM:123864|Ensembl:ENSG00000131143|HPRD:00466|Vega:OTTHUMG00000137649	16	16q24.1	cytochrome c oxidase subunit IV isoform 1	protein-coding	COX4I1	cytochrome c oxidase subunit IV isoform 1	O	COX IV-1|cytochrome c oxidase polypeptide IV|cytochrome c oxidase subunit 4 isoform 1, mitochondrial	20130505
9606	1329	COX5B	-	COXVB	HGNC:2269|MIM:123866|HPRD:00467	2	2q11.2	cytochrome c oxidase subunit Vb	protein-coding	COX5B	cytochrome c oxidase subunit Vb	O	cytochrome c oxidase polypeptide VB, mitochondrial|cytochrome c oxidase subunit 5B, mitochondrial	20130505
9606	1330	COX5BP1	-	COX5BL1	HGNC:2270	4	4q21.3	cytochrome c oxidase subunit Vb pseudogene 1	pseudo	COX5BP1	cytochrome c oxidase subunit Vb pseudogene 1	O	-	20130226
9606	1331	COX5BP2	-	COX5BL2	HGNC:2271	6	6q23.3	cytochrome c oxidase subunit Vb pseudogene 2	pseudo	COX5BP2	cytochrome c oxidase subunit Vb pseudogene 2	O	-	20130226
9606	1332	COX5BP3	-	COX5BL3	HGNC:2272	7	7q33	cytochrome c oxidase subunit Vb pseudogene 3	pseudo	COX5BP3	cytochrome c oxidase subunit Vb pseudogene 3	O	-	20130226
9606	1333	COX5BP4	-	COX5BL4	HGNC:2273	11	11q	cytochrome c oxidase subunit Vb pseudogene 4	pseudo	COX5BP4	cytochrome c oxidase subunit Vb pseudogene 4	O	-	20130226
9606	1336	COX5BP7	-	COX5BL7	HGNC:2276	22	22q13.1	cytochrome c oxidase subunit Vb pseudogene 7	pseudo	COX5BP7	cytochrome c oxidase subunit Vb pseudogene 7	O	-	20130226
9606	1337	COX6A1	-	COX6A|COX6AL	HGNC:2277|MIM:602072|Ensembl:ENSG00000111775|HPRD:03644|Vega:OTTHUMG00000047791	12	12q24.2|12q24.2	cytochrome c oxidase subunit VIa polypeptide 1	protein-coding	COX6A1	cytochrome c oxidase subunit VIa polypeptide 1	O	COX VIa-L|cytochrome C oxidase subunit VIa homolog|cytochrome c oxidase polypeptide VIa-liver|cytochrome c oxidase subunit 6A1, mitochondrial|cytochrome c oxidase subunit VIA-liver	20130505
9606	1338	COX6A1P1	-	COX6A1P	HGNC:2278	1	1p31.1	cytochrome c oxidase subunit VIa polypeptide 1 pseudogene 1	pseudo	COX6A1P1	cytochrome c oxidase subunit VIa polypeptide 1 pseudogene 1	O	-	20130226
9606	1339	COX6A2	-	COX6AH|COXVIAH	HGNC:2279|MIM:602009|Ensembl:ENSG00000156885|HPRD:03598|Vega:OTTHUMG00000132463	16	16p11.12	cytochrome c oxidase subunit VIa polypeptide 2	protein-coding	COX6A2	cytochrome c oxidase subunit VIa polypeptide 2	O	COX VIa-M|cytochrome c oxidase polypeptide VIa-heart|cytochrome c oxidase subunit 6A2, mitochondrial|cytochrome c oxidase subunit VIA-muscle	20130505
9606	1340	COX6B1	-	COX6B|COXG|COXVIb1	HGNC:2280|MIM:124089|Ensembl:ENSG00000126267|HPRD:00493|Vega:OTTHUMG00000048112	19	19q13.1	cytochrome c oxidase subunit VIb polypeptide 1 (ubiquitous)	protein-coding	COX6B1	cytochrome c oxidase subunit VIb polypeptide 1 (ubiquitous)	O	COX VIb-1|cytochrome c oxidase subunit 6B1	20130505
9606	1342	COX6B1P2	-	COX6BP-2|COX6BP2	HGNC:2282	17	17q21.32	cytochrome c oxidase subunit VIb polypeptide 1 (ubiquitous) pseudogene 2	pseudo	COX6B1P2	cytochrome c oxidase subunit VIb polypeptide 1 (ubiquitous) pseudogene 2	O	-	20130226
9606	1343	COX6B1P3	-	COX6BP-3|COX6BP3	HGNC:2283	22	22q13.2	cytochrome c oxidase subunit VIb polypeptide 1 (ubiquitous) pseudogene 3	pseudo	COX6B1P3	cytochrome c oxidase subunit VIb polypeptide 1 (ubiquitous) pseudogene 3	O	-	20130226
9606	1345	COX6C	-	-	HGNC:2285|MIM:124090|Ensembl:ENSG00000164919|HPRD:00494|Vega:OTTHUMG00000164703	8	8q22.2	cytochrome c oxidase subunit VIc	protein-coding	COX6C	cytochrome c oxidase subunit VIc	O	cytochrome c oxidase polypeptide VIc|cytochrome c oxidase subunit 6C|cytochrome c oxidase subunit VIc preprotein	20130505
9606	1346	COX7A1	-	COX7A|COX7AH|COX7AM	HGNC:2287|MIM:123995|Ensembl:ENSG00000161281|HPRD:00481|Vega:OTTHUMG00000048144	19	19q13.1	cytochrome c oxidase subunit VIIa polypeptide 1 (muscle)	protein-coding	COX7A1	cytochrome c oxidase subunit VIIa polypeptide 1 (muscle)	O	cytochrome c oxidase subunit 7A1, mitochondrial|cytochrome c oxidase subunit VIIa heart/muscle isoform|cytochrome c oxidase subunit VIIa-H|cytochrome c oxidase subunit VIIa-M|cytochrome c oxidase subunit VIIa-heart|cytochrome c oxidase subunit VIIa-muscle	20130504
9606	1347	COX7A2	-	COX7AL|COX7AL1|COXVIIAL|COXVIIa-L|VIIAL	HGNC:2288|MIM:123996|Ensembl:ENSG00000112695|HPRD:00482|Vega:OTTHUMG00000015049	6	6q12	cytochrome c oxidase subunit VIIa polypeptide 2 (liver)	protein-coding	COX7A2	cytochrome c oxidase subunit VIIa polypeptide 2 (liver)	O	cytochrome c oxidase polypeptide 7A2, mitochondrial|cytochrome c oxidase polypeptide VIIa-liver/heart|cytochrome c oxidase subunit 7A2, mitochondrial|cytochrome c oxidase subunit VIIa-L|cytochrome c oxidase subunit VIIa-liver/heart|cytochrome c oxidase subunit VIIaL|hepatic cytochrome-c oxidase chain VIIa	20130505
9606	1348	COX7A2P2	-	COX7A3|COX7AL|COX7AL2|COX7AP2	HGNC:2290|MIM:123997|HPRD:00483	4	4q22.3	cytochrome c oxidase subunit VIIa polypeptide 2 (liver) pseudogene 2	pseudo	COX7A2P2	cytochrome c oxidase subunit VIIa polypeptide 2 (liver) pseudogene 2	O	-	20130226
9606	1349	COX7B	-	APLCC	HGNC:2291|MIM:300885|HPRD:04812	X	Xq21.1	cytochrome c oxidase subunit VIIb	protein-coding	COX7B	cytochrome c oxidase subunit VIIb	O	cytochrome c oxidase polypeptide VIIb|cytochrome c oxidase subunit 7B, mitochondrial|cytochrome-c oxidase chain VIIb	20130505
9606	1350	COX7C	-	-	HGNC:2292|MIM:603774|HPRD:04800	5	5q14	cytochrome c oxidase subunit VIIc	protein-coding	COX7C	cytochrome c oxidase subunit VIIc	O	cytochrome c oxidase polypeptide VIIc|cytochrome c oxidase subunit 7C, mitochondrial|cytochrome-c oxidase chain VIIc	20130505
9606	1351	COX8A	-	COX|COX8|COX8-2|COX8L|VIII|VIII-L	HGNC:2294|MIM:123870|Ensembl:ENSG00000176340|HPRD:00468|Vega:OTTHUMG00000167785	11	11q12-q13	cytochrome c oxidase subunit VIIIA (ubiquitous)	protein-coding	COX8A	cytochrome c oxidase subunit VIIIA (ubiquitous)	O	cytochrome c oxidase polypeptide VIII-liver/heart|cytochrome c oxidase subunit 8-2|cytochrome c oxidase subunit 8A (ubiquitous)|cytochrome c oxidase subunit 8A, mitochondrial|cytochrome c oxidase subunit VIII	20130505
9606	1352	COX10	-	-	HGNC:2260|MIM:602125|Ensembl:ENSG00000006695|HPRD:03673|Vega:OTTHUMG00000058814	17	17p12	cytochrome c oxidase assembly homolog 10 (yeast)	protein-coding	COX10	cytochrome c oxidase assembly homolog 10 (yeast)	O	COX10 homolog, cytochrome c oxidase assembly protein, heme A: farnesyltransferase|cytochrome c oxidase assembly protein|cytochrome c oxidase subunit X|heme A: farnesyltransferase|heme O synthase|protoheme IX farnesyltransferase, mitochondrial	20130504
9606	1353	COX11	-	COX11P	HGNC:2261|MIM:603648|Ensembl:ENSG00000166260|HPRD:04709|Vega:OTTHUMG00000177838	17	17q22	cytochrome c oxidase assembly homolog 11 (yeast)	protein-coding	COX11	cytochrome c oxidase assembly homolog 11 (yeast)	O	COX11 cytochrome c oxidase assembly homolog|COX11 homolog, cytochrome c oxidase assembly protein|cytochrome c oxidase assembly protein COX11, mitochondrial|cytochrome c oxidase subunit 11	20130505
9606	1355	COX15	-	CEMCOX2	HGNC:2263|MIM:603646|HPRD:04707	10	10q24	cytochrome c oxidase assembly homolog 15 (yeast)	protein-coding	COX15	cytochrome c oxidase assembly homolog 15 (yeast)	O	COX15 homolog, cytochrome c oxidase assembly protein|cytochrome c oxidase assembly protein COX15 homolog|cytochrome c oxidase subunit 15	20130505
9606	1356	CP	-	CP-2	HGNC:2295|MIM:117700|Ensembl:ENSG00000047457|HPRD:00317|Vega:OTTHUMG00000159563	3	3q23-q25	ceruloplasmin (ferroxidase)	protein-coding	CP	ceruloplasmin (ferroxidase)	O	ceruloplasmin	20130512
9606	1357	CPA1	-	CPA	HGNC:2296|MIM:114850|Ensembl:ENSG00000091704|HPRD:00269|Vega:OTTHUMG00000157826	7	7q32	carboxypeptidase A1 (pancreatic)	protein-coding	CPA1	carboxypeptidase A1 (pancreatic)	O	carboxypeptidase A1|pancreatic carboxypeptidase A	20130505
9606	1358	CPA2	-	-	HGNC:2297|MIM:600688|Ensembl:ENSG00000158516|HPRD:02821|Vega:OTTHUMG00000157019	7	7q32	carboxypeptidase A2 (pancreatic)	protein-coding	CPA2	carboxypeptidase A2 (pancreatic)	O	carboxypeptidase A2	20130504
9606	1359	CPA3	-	MC-CPA	HGNC:2298|MIM:114851|Ensembl:ENSG00000163751|HPRD:00270|Vega:OTTHUMG00000159526	3	3q24	carboxypeptidase A3 (mast cell)	protein-coding	CPA3	carboxypeptidase A3 (mast cell)	O	mast cell carboxypeptidase A|tissue carboxypeptidase A	20130504
9606	1360	CPB1	-	CPB|PASP|PCPB	HGNC:2299|MIM:114852|Ensembl:ENSG00000153002|HPRD:00271|Vega:OTTHUMG00000159520	3	3q24	carboxypeptidase B1 (tissue)	protein-coding	CPB1	carboxypeptidase B1 (tissue)	O	carboxypeptidase B|pancreas-specific protein|pancreatic carboxypeptidase B|procarboxypeptidase B|protaminase|tissue carboxypeptidase B	20130427
9606	1361	CPB2	-	CPU|PCPB|TAFI	HGNC:2300|MIM:603101|Ensembl:ENSG00000080618|HPRD:04374|Vega:OTTHUMG00000016867	13	13q14.11	carboxypeptidase B2 (plasma)	protein-coding	CPB2	carboxypeptidase B2 (plasma)	O	carboxypeptidase B-like protein|carboxypeptidase B2|carboxypeptidase B2 (plasma, carboxypeptidase U)|carboxypeptidase R|thrombin-activable fibrinolysis inhibitor|thrombin-activatable fibrinolysis inhibitor	20130512
9606	1362	CPD	-	GP180	HGNC:2301|MIM:603102|Ensembl:ENSG00000108582|HPRD:04375|Vega:OTTHUMG00000132797	17	17q11.2	carboxypeptidase D	protein-coding	CPD	carboxypeptidase D	O	metallocarboxypeptidase D	20130505
9606	1363	CPE	-	-	HGNC:2303|MIM:114855|Ensembl:ENSG00000109472|HPRD:00272|Vega:OTTHUMG00000150252	4	4q32.3	carboxypeptidase E	protein-coding	CPE	carboxypeptidase E	O	CPH|carboxypeptidase H|cobalt-stimulated chromaffin granule carboxypeptidase|enkephalin convertase|insulin granule-associated carboxypeptidase|prohormone-processing carboxypeptidase	20130505
9606	1364	CLDN4	-	CPE-R|CPER|CPETR|CPETR1|WBSCR8|hCPE-R	HGNC:2046|MIM:602909|Ensembl:ENSG00000189143|HPRD:04218	7	7q11.23	claudin 4	protein-coding	CLDN4	claudin 4	O	CPE-receptor|Clostridium perfringens enterotoxin receptor 1|Williams-Beuren syndrome chromosomal region 8 protein|claudin-4	20130505
9606	1365	CLDN3	-	C7orf1|CPE-R2|CPETR2|HRVP1|RVP1	HGNC:2045|MIM:602910|Ensembl:ENSG00000165215|HPRD:04219|Vega:OTTHUMG00000023424	7	7q11.23	claudin 3	protein-coding	CLDN3	claudin 3	O	CPE-R 2|CPE-receptor 2|Clostridium perfringens enterotoxin receptor 2|claudin-3|ventral prostate.1 protein homolog|ventral prostate.1-like protein	20130505
9606	1366	CLDN7	-	CEPTRL2|CLDN-7|CPETRL2|Hs.84359|claudin-1	HGNC:2049|MIM:609131|Ensembl:ENSG00000181885|HPRD:07633|Vega:OTTHUMG00000178005	17	-	claudin 7	protein-coding	CLDN7	claudin 7	O	claudin-7|clostridium perfringens enterotoxin receptor-like 2	20130512
9606	1368	CPM	-	-	HGNC:2311|MIM:114860|Ensembl:ENSG00000135678|HPRD:00273|Vega:OTTHUMG00000169300	12	12q14.3	carboxypeptidase M	protein-coding	CPM	carboxypeptidase M	O	renal carboxypeptidase|urinary carboxypeptidase B	20130505
9606	1369	CPN1	-	CPN|SCPN	HGNC:2312|MIM:603103|Ensembl:ENSG00000120054|HPRD:09120|Vega:OTTHUMG00000018896	10	10q24.2	carboxypeptidase N, polypeptide 1	protein-coding	CPN1	carboxypeptidase N, polypeptide 1	O	anaphylatoxin inactivator|arginine carboxypeptidase|carboxypeptidase K|carboxypeptidase N catalytic chain|carboxypeptidase N catalytic subunit|carboxypeptidase N polypeptide 1 50 kD|carboxypeptidase N small subunit|kininase I|kininase-1|lysine carboxypeptidase|plasma carboxypeptidase B|serum carboxypeptidase N	20130505
9606	1370	CPN2	-	ACBP	HGNC:2313|MIM:603104|Ensembl:ENSG00000178772|HPRD:11928|Vega:OTTHUMG00000156047	3	3q29	carboxypeptidase N, polypeptide 2	protein-coding	CPN2	carboxypeptidase N, polypeptide 2	O	arginine carboxypeptidase (carboxypeptidase N)|carboxypeptidase N 83 kDa chain|carboxypeptidase N large subunit|carboxypeptidase N regulatory subunit|carboxypeptidase N subunit 2|carboxypeptidase N, polypeptide 2, 83kD	20130505
9606	1371	CPOX	-	CPO|CPX|HCP	HGNC:2321|MIM:612732|Ensembl:ENSG00000080819|HPRD:00417|Vega:OTTHUMG00000160016	3	3q12	coproporphyrinogen oxidase	protein-coding	CPOX	coproporphyrinogen oxidase	O	COX|coprogen oxidase|coproporphyrinogen-III oxidase, mitochondrial|coproporphyrinogenase	20130505
9606	1373	CPS1	-	CPSASE1	HGNC:2323|MIM:608307|Ensembl:ENSG00000021826|HPRD:01995|Vega:OTTHUMG00000132994	2	2q35	carbamoyl-phosphate synthase 1, mitochondrial	protein-coding	CPS1	carbamoyl-phosphate synthase 1, mitochondrial	O	carbamoyl-phosphate synthase [ammonia], mitochondrial|carbamoylphosphate synthetase I	20130505
9606	1374	CPT1A	-	CPT1|CPT1-L|L-CPT1	HGNC:2328|MIM:600528|Ensembl:ENSG00000110090|HPRD:02755|Vega:OTTHUMG00000167892	11	11q13.2	carnitine palmitoyltransferase 1A (liver)	protein-coding	CPT1A	carnitine palmitoyltransferase 1A (liver)	O	CPT I|CPTI-L|carnitine O-palmitoyltransferase 1, liver isoform|carnitine O-palmitoyltransferase I, liver isoform|carnitine palmitoyltransferase I, liver	20130505
9606	1375	CPT1B	-	CPT1-M|CPT1M|CPTI|CPTI-M|M-CPT1|MCCPT1|MCPT1	HGNC:2329|MIM:601987|Ensembl:ENSG00000205560|HPRD:09065|Vega:OTTHUMG00000137390	22	22q13.33	carnitine palmitoyltransferase 1B (muscle)	protein-coding	CPT1B	carnitine palmitoyltransferase 1B (muscle)	O	carnitine O-palmitoyltransferase 1, muscle isoform|carnitine O-palmitoyltransferase I, mitochondrial muscle isoform|carnitine palmitoyltransferase I-like protein	20130427
9606	1376	CPT2	-	CPT1|CPTASE|IIAE4	HGNC:2330|MIM:600650|Ensembl:ENSG00000157184|HPRD:02802|Vega:OTTHUMG00000008942	1	1p32	carnitine palmitoyltransferase 2	protein-coding	CPT2	carnitine palmitoyltransferase 2	O	CPT II|carnitine O-palmitoyltransferase 2, mitochondrial|carnitine palmitoyltransferase II	20130505
9606	1378	CR1	RP11-57I17.1	C3BR|C4BR|CD35|KN	HGNC:2334|MIM:120620|Ensembl:ENSG00000203710|HPRD:00398|Vega:OTTHUMG00000036311	1	1q32	complement component (3b/4b) receptor 1 (Knops blood group)	protein-coding	CR1	complement component (3b/4b) receptor 1 (Knops blood group)	O	C3-binding protein|C3b/C4b receptor|CD35 antigen|Knops blood group antigen|complement component receptor 1|complement receptor type 1	20130512
9606	1379	CR1L	-	-	HGNC:2335|MIM:605886|Ensembl:ENSG00000197721|Vega:OTTHUMG00000036354	1	1q32.1	complement component (3b/4b) receptor 1-like	protein-coding	CR1L	complement component (3b/4b) receptor 1-like	O	complement C4b-binding protein CR-1-like protein|complement component receptor 1-like protein	20130226
9606	1380	CR2	RP11-78B10.1	C3DR|CD21|CR|CVID7|SLEB9	HGNC:2336|MIM:120650|Ensembl:ENSG00000117322|HPRD:00399|Vega:OTTHUMG00000036307	1	1q32	complement component (3d/Epstein Barr virus) receptor 2	protein-coding	CR2	complement component (3d/Epstein Barr virus) receptor 2	O	EBV receptor|complement C3d receptor|complement receptor type 2|epstein-Barr virus receptor	20130505
9606	1381	CRABP1	-	CRABP|CRABP-I|CRABPI|RBP5	HGNC:2338|MIM:180230|Ensembl:ENSG00000166426|HPRD:07520|Vega:OTTHUMG00000143862	15	15q24	cellular retinoic acid binding protein 1	protein-coding	CRABP1	cellular retinoic acid binding protein 1	O	cellular retinoic acid-binding protein 1|cellular retinoic acid-binding protein I	20130505
9606	1382	CRABP2	RP11-66D17.4	CRABP-II|RBP6	HGNC:2339|MIM:180231|Ensembl:ENSG00000143320|HPRD:08353|Vega:OTTHUMG00000041300	1	1q21.3	cellular retinoic acid binding protein 2	protein-coding	CRABP2	cellular retinoic acid binding protein 2	O	cellular retinoic acid-binding protein 2|cellular retinoic acid-binding protein II	20130505
9606	1384	CRAT	RP11-247A12.5	CAT1	HGNC:2342|MIM:600184|Ensembl:ENSG00000095321|HPRD:08971|Vega:OTTHUMG00000147343	9	9q34.1	carnitine O-acetyltransferase	protein-coding	CRAT	carnitine O-acetyltransferase	O	CAT|carnitine acetylase|carnitine acetyltransferase	20130505
9606	1385	CREB1	-	CREB	HGNC:2345|MIM:123810|HPRD:00442	2	2q34	cAMP responsive element binding protein 1	protein-coding	CREB1	cAMP responsive element binding protein 1	O	CREB-1|active transcription factor CREB|cAMP-response element-binding protein-1|cAMP-responsive element-binding protein 1|cyclic AMP-responsive element-binding protein 1|transactivator protein	20130512
9606	1386	ATF2	-	CRE-BP1|CREB2|HB16|TREB7	HGNC:784|MIM:123811|Ensembl:ENSG00000115966|HPRD:00443|Vega:OTTHUMG00000132424	2	2q32	activating transcription factor 2	protein-coding	ATF2	activating transcription factor 2	O	CREB-2|activating transcription factor 2 splice variant ATF2-var2|cAMP response element-binding protein CRE-BP1|cAMP responsive element binding protein 2, formerly|cAMP-dependent transcription factor ATF-2|cAMP-responsive element-binding protein 2|cyclic AMP-dependent transcription factor ATF-2|cyclic AMP-responsive element-binding protein 2	20130505
9606	1387	CREBBP	-	CBP|KAT3A|RSTS	HGNC:2348|MIM:600140|Ensembl:ENSG00000005339|HPRD:02534|Vega:OTTHUMG00000129431	16	16p13.3	CREB binding protein	protein-coding	CREBBP	CREB binding protein	O	CREB-binding protein	20130505
9606	1388	ATF6B	DADB-220I18.4	CREB-RP|CREBL1|G13	HGNC:2349|MIM:600984|Ensembl:ENSG00000213676|HPRD:02992|Vega:OTTHUMG00000031296	6	6p21.3	activating transcription factor 6 beta	protein-coding	ATF6B	activating transcription factor 6 beta	O	ATF6-beta|Creb-related protein|cAMP response element-binding protein-related protein|cAMP responsive element binding protein-like 1|cAMP-dependent transcription factor ATF-6 beta|cAMP-responsive element-binding protein-like 1|cyclic AMP-dependent transcription factor ATF-6 beta|protein G13	20130505
9606	1389	CREBL2	-	-	HGNC:2350|MIM:603476|Ensembl:ENSG00000111269|HPRD:07541|Vega:OTTHUMG00000168704	12	12p13	cAMP responsive element binding protein-like 2	protein-coding	CREBL2	cAMP responsive element binding protein-like 2	O	MHBs-binding protein 1|cAMP-responsive element-binding protein-like 2	20130505
9606	1390	CREM	RP11-324I22.1	CREM-2|ICER|hCREM-2	HGNC:2352|MIM:123812|Ensembl:ENSG00000095794|HPRD:00444|Vega:OTTHUMG00000017953	10	10p11.21	cAMP responsive element modulator	protein-coding	CREM	cAMP responsive element modulator	O	CREM 2alpha-b protein|CREM 2beta-a protein|cAMP response element modulator|cAMP-responsive element modulator|inducible cAMP early repressor ICER	20130505
9606	1391	CRG	-	-	HGNC:2354	-	-	CHARGE association	unknown	CRG	CHARGE association	O	-	20130226
9606	1392	CRH	-	CRF	HGNC:2355|MIM:122560|Ensembl:ENSG00000147571|HPRD:07172|Vega:OTTHUMG00000164474	8	8q13	corticotropin releasing hormone	protein-coding	CRH	corticotropin releasing hormone	O	corticoliberin|corticotropin-releasing factor	20130505
9606	1393	CRHBP	-	CRF-BP|CRFBP	HGNC:2356|MIM:122559|Ensembl:ENSG00000145708|HPRD:08348|Vega:OTTHUMG00000102133	5	5q11.2-q13.3	corticotropin releasing hormone binding protein	protein-coding	CRHBP	corticotropin releasing hormone binding protein	O	CRF-binding protein|CRH-BP|corticotropin releasing hormone-binding protein|corticotropin-releasing factor-binding protein|corticotropin-releasing hormone-binding protein	20130505
9606	1394	CRHR1	-	CRF-R|CRF-R-1|CRF-R1|CRF1|CRFR-1|CRFR1|CRH-R-1|CRH-R1|CRH-R1h|CRHR|CRHR1L|CRHR1f	HGNC:2357|MIM:122561|Ensembl:ENSG00000120088|HPRD:08830|Vega:OTTHUMG00000178271	17	17q12-q22	corticotropin releasing hormone receptor 1	protein-coding	CRHR1	corticotropin releasing hormone receptor 1	O	corticotropin releasing hormone receptor variant 1e|corticotropin releasing hormone receptor variant 1g|corticotropin-releasing factor receptor 1|corticotropin-releasing factor type 1 receptor|corticotropin-releasing hormone receptor 1|seven transmembrane helix receptor	20130512
9606	1395	CRHR2	-	CRF-RB|CRF2|CRFR2|HM-CRF	HGNC:2358|MIM:602034|HPRD:03614	7	7p14.3	corticotropin releasing hormone receptor 2	protein-coding	CRHR2	corticotropin releasing hormone receptor 2	O	CRF2 receptor, beta isoform|CRH-R2|corticotropin-releasing factor receptor 2	20130512
9606	1396	CRIP1	-	CRHP|CRIP|CRP-1|CRP1	HGNC:2360|MIM:123875|Ensembl:ENSG00000213145|HPRD:00469|Vega:OTTHUMG00000029908	14	14q32.33	cysteine-rich protein 1 (intestinal)	protein-coding	CRIP1	cysteine-rich protein 1 (intestinal)	O	cysteine-rich heart protein|cysteine-rich intestinal protein|cysteine-rich protein 1	20130505
9606	1397	CRIP2	-	CRIP|CRP2|ESP1	HGNC:2361|MIM:601183|Ensembl:ENSG00000182809|HPRD:03113|Vega:OTTHUMG00000029906	14	14q32.3	cysteine-rich protein 2	protein-coding	CRIP2	cysteine-rich protein 2	O	Cysteine-rich intestinal protein|LIM domain protein ESP1/CRP2	20130505
9606	1398	CRK	-	CRKII|p38	HGNC:2362|MIM:164762|Ensembl:ENSG00000167193|HPRD:01267|Vega:OTTHUMG00000090317	17	17p13.3	v-crk sarcoma virus CT10 oncogene homolog (avian)	protein-coding	CRK	v-crk sarcoma virus CT10 oncogene homolog (avian)	O	adapter molecule crk|proto-oncogene c-Crk	20130505
9606	1399	CRKL	-	-	HGNC:2363|MIM:602007|Ensembl:ENSG00000099942|HPRD:03596|Vega:OTTHUMG00000150807	22	22q11.21	v-crk sarcoma virus CT10 oncogene homolog (avian)-like	protein-coding	CRKL	v-crk sarcoma virus CT10 oncogene homolog (avian)-like	O	crk-like protein	20130505
9606	1400	CRMP1	-	CRMP-1|DPYSL1|DRP-1|DRP1|ULIP-3	HGNC:2365|MIM:602462|Ensembl:ENSG00000072832|HPRD:03913|Vega:OTTHUMG00000125489	4	4p16.1	collapsin response mediator protein 1	protein-coding	CRMP1	collapsin response mediator protein 1	O	dihydropyrimidinase related protein-1|dihydropyrimidinase-like 1|dihydropyrimidinase-related protein 1|unc-33-like phosphoprotein 3	20130505
9606	1401	CRP	RP11-419N10.4	PTX1	HGNC:2367|MIM:123260|Ensembl:ENSG00000132693|HPRD:00422|Vega:OTTHUMG00000035344	1	1q21-q23	C-reactive protein, pentraxin-related	protein-coding	CRP	C-reactive protein, pentraxin-related	O	C-reactive protein|pentraxin 1	20130505
9606	1403	CRS	-	CRS1|CSO	HGNC:2369|MIM:123100	7	7p21	craniosynostosis	unknown	CRS	craniosynostosis	O	-	20130226
9606	1404	HAPLN1	-	CRTL1	HGNC:2380|MIM:115435|Ensembl:ENSG00000145681|HPRD:00275|Vega:OTTHUMG00000119045	5	5q14.3	hyaluronan and proteoglycan link protein 1	protein-coding	HAPLN1	hyaluronan and proteoglycan link protein 1	O	Cartilage link protein|cartilage linking protein 1|cartilage-link protein|cartilage-linking protein 1|proteoglycan link protein	20130505
9606	1406	CRX	-	CORD2|CRD|LCA7|OTX3	HGNC:2383|MIM:602225|Ensembl:ENSG00000105392|HPRD:03748|Vega:OTTHUMG00000170610	19	19q13.3	cone-rod homeobox	protein-coding	CRX	cone-rod homeobox	O	cone-rod homeobox protein|orthodenticle homeobox 3	20130505
9606	1407	CRY1	-	PHLL1	HGNC:2384|MIM:601933|Ensembl:ENSG00000008405|HPRD:09050|Vega:OTTHUMG00000170005	12	12q23-q24.1	cryptochrome 1 (photolyase-like)	protein-coding	CRY1	cryptochrome 1 (photolyase-like)	O	cryptochrome-1	20130512
9606	1408	CRY2	-	HCRY2|PHLL2	HGNC:2385|MIM:603732|Ensembl:ENSG00000121671|HPRD:07226|Vega:OTTHUMG00000153225	11	11p11.2	cryptochrome 2 (photolyase-like)	protein-coding	CRY2	cryptochrome 2 (photolyase-like)	O	cryptochrome-2|growth-inhibiting protein 37	20130505
9606	1409	CRYAA	-	CRYA1|HSPB4	HGNC:2388|MIM:123580|Ensembl:ENSG00000160202|HPRD:00427|Vega:OTTHUMG00000086842	21	21q22.3	crystallin, alpha A	protein-coding	CRYAA	crystallin, alpha A	O	alpha-crystallin A chain|crystallin, alpha-1|heat shock protein beta-4|human alphaA-crystallin (CRYA1)	20130505
9606	1410	CRYAB	-	CMD1II|CRYA2|CTPP2|HSPB5	HGNC:2389|MIM:123590|Ensembl:ENSG00000109846|HPRD:00428|Vega:OTTHUMG00000166885	11	11q22.3-q23.1	crystallin, alpha B	protein-coding	CRYAB	crystallin, alpha B	O	alpha-crystallin B chain|heat shock protein beta-5|heat-shock 20 kD like-protein|renal carcinoma antigen NY-REN-27|rosenthal fiber component	20130512
9606	1411	CRYBA1	-	CRYB1	HGNC:2394|MIM:123610|Ensembl:ENSG00000108255|HPRD:00429|Vega:OTTHUMG00000132729	17	17q11.2	crystallin, beta A1	protein-coding	CRYBA1	crystallin, beta A1	O	beta-crystallin A3|crystallin, beta A3|eye lens structural protein	20130505
9606	1412	CRYBA2	-	-	HGNC:2395|MIM:600836|Ensembl:ENSG00000163499|HPRD:02905|Vega:OTTHUMG00000133084	2	2q35	crystallin, beta A2	protein-coding	CRYBA2	crystallin, beta A2	O	beta-crystallin A2|eye lens structural protein	20130505
9606	1413	CRYBA4	CTA-445C9.1	MCOPCT4	HGNC:2396|MIM:123631|Ensembl:ENSG00000196431|HPRD:00432|Vega:OTTHUMG00000150983	22	22q12.1	crystallin, beta A4	protein-coding	CRYBA4	crystallin, beta A4	O	beta-A4 crystallin|beta-crystallin A4|crystallin, beta polypeptide A4|eye lens structural protein	20130225
9606	1414	CRYBB1	-	CATCN3	HGNC:2397|MIM:600929|Ensembl:ENSG00000100122|HPRD:09021|Vega:OTTHUMG00000150980	22	22q12.1	crystallin, beta B1	protein-coding	CRYBB1	crystallin, beta B1	O	beta-B1 crystallin|beta-crystallin B1|eye lens structural protein	20130505
9606	1415	CRYBB2	-	CCA2|CRYB2|CRYB2A|CTRCT3|D22S665	HGNC:2398|MIM:123620|Ensembl:ENSG00000244752|HPRD:00430|Vega:OTTHUMG00000150905	22	22q11.23	crystallin, beta B2	protein-coding	CRYBB2	crystallin, beta B2	O	beta-B2 crystallin|beta-crystallin B2|beta-crystallin Bp|eye lens structural protein	20130505
9606	1416	CRYBB2P1	-	CRYB2B	HGNC:2399|Ensembl:ENSG00000100058	22	22q11.2-q12.1	crystallin, beta B2 pseudogene 1	pseudo	CRYBB2P1	crystallin, beta B2 pseudogene 1	O	-	20130226
9606	1417	CRYBB3	CTA-221G9.6	CATCN2|CRYB3	HGNC:2400|MIM:123630|Ensembl:ENSG00000100053|HPRD:00431|Vega:OTTHUMG00000150869	22	22q11.23	crystallin, beta B3	protein-coding	CRYBB3	crystallin, beta B3	O	beta-B3 crystallin|beta-crystallin B3|eye lens structural protein	20130505
9606	1418	CRYGA	-	CRY-g-A|CRYG1|CRYG5	HGNC:2408|MIM:123660|Ensembl:ENSG00000168582|HPRD:00433|Vega:OTTHUMG00000154796	2	2q34	crystallin, gamma A	protein-coding	CRYGA	crystallin, gamma A	O	crystallin, gamma 1|gamma-crystallin 5|gamma-crystallin A	20130319
9606	1419	CRYGB	-	CRYG2	HGNC:2409|MIM:123670|Ensembl:ENSG00000182187|HPRD:00434|Vega:OTTHUMG00000132941	2	2q34	crystallin, gamma B	protein-coding	CRYGB	crystallin, gamma B	O	crystallin, gamma 1-2|gamma-crystallin B	20130226
9606	1420	CRYGC	-	CCL|CRYG3|CTRCT2	HGNC:2410|MIM:123680|Ensembl:ENSG00000163254|HPRD:00435|Vega:OTTHUMG00000132942	2	2q33.3	crystallin, gamma C	protein-coding	CRYGC	crystallin, gamma C	O	crystallin, gamma-3|gamma-C-crystallin|gamma-crystallin 2-1|gamma-crystallin 3|gamma-crystallin C	20130505
9606	1421	CRYGD	-	CACA|CCA3|CCP|CRYG4|CTRCT4|PCC|cry-g-D	HGNC:2411|MIM:123690|Ensembl:ENSG00000118231|HPRD:00436|Vega:OTTHUMG00000132944	2	2q33.3	crystallin, gamma D	protein-coding	CRYGD	crystallin, gamma D	O	gamma crystallin 4|gamma-D-crystallin|gamma-crystallin 4|gamma-crystallin D	20130505
9606	1423	CRYGFP	-	CRYG6|CRYGFP1|p1	HGNC:2413	2	2q34	crystallin, gamma F pseudogene	pseudo	CRYGFP	crystallin, gamma F pseudogene	O	-	20130226
9606	1424	CRYGGP	-	CRYGGP1	HGNC:2414	2	2p16.3	crystallin, gamma G, pseudogene	pseudo	CRYGGP	crystallin, gamma G, pseudogene	O	-	20130226
9606	1427	CRYGS	-	CRYG8	HGNC:2417|MIM:123730|HPRD:00439	3	3q27.3	crystallin, gamma S	protein-coding	CRYGS	crystallin, gamma S	O	beta-crystallin S|crystallin, gamma 8|gamma-S-crystallin|gamma-crystallin S	20130505
9606	1428	CRYM	-	DFNA40|THBP	HGNC:2418|MIM:123740|Ensembl:ENSG00000103316|HPRD:08831|Vega:OTTHUMG00000090707	16	16p12.2	crystallin, mu	protein-coding	CRYM	crystallin, mu	O	NADP-regulated thyroid-hormone binding protein|ketimine reductase|mu-crystallin homolog|thiomorpholine-carboxylate dehydrogenase	20130505
9606	1429	CRYZ	-	-	HGNC:2419|MIM:123691|Ensembl:ENSG00000116791|HPRD:00437|Vega:OTTHUMG00000009620	1	1p31.1	crystallin, zeta (quinone reductase)	protein-coding	CRYZ	crystallin, zeta (quinone reductase)	O	NADPH:quinone reductase|quinone oxidoreductase	20130505
9606	1430	CRYZP1	-	-	HGNC:2421	7	7q22	crystallin, zeta (quinone reductase) pseudogene 1	pseudo	CRYZP1	crystallin, zeta (quinone reductase) pseudogene 1	O	-	20130226
9606	1431	CS	-	-	HGNC:2422|MIM:118950|Ensembl:ENSG00000062485|HPRD:00349|Vega:OTTHUMG00000170344	12	12q13.2	citrate synthase	protein-coding	CS	citrate synthase	O	citrate synthase, mitochondrial	20130505
9606	1432	MAPK14	RP1-179N16.5	CSBP|CSBP1|CSBP2|CSPB1|EXIP|Mxi2|PRKM14|PRKM15|RK|SAPK2A|p38|p38ALPHA	HGNC:6876|MIM:600289|Ensembl:ENSG00000112062|HPRD:02619|Vega:OTTHUMG00000159806	6	6p21.3-p21.2	mitogen-activated protein kinase 14	protein-coding	MAPK14	mitogen-activated protein kinase 14	O	CSAID-binding protein|Csaids binding protein|MAP kinase 14|MAP kinase Mxi2|MAP kinase p38 alpha|MAX-interacting protein 2|cytokine suppressive anti-inflammatory drug binding protein|cytokine suppressive anti-inflammatory drug-binding protein|mitogen-activated protein kinase p38 alpha|p38 MAP kinase|p38 mitogen activated protein kinase|p38alpha Exip|stress-activated protein kinase 2A	20130512
9606	1433	CSE	-	DYT9	HGNC:2430|MIM:601042	1	1p31	choreoathetosis/spasticity, episodic (paroxysmal choreoathetosis/spasticity)	unknown	CSE	choreoathetosis/spasticity, episodic (paroxysmal choreoathetosis/spasticity)	O	-	20130226
9606	1434	CSE1L	-	CAS|CSE1|XPO2	HGNC:2431|MIM:601342|Ensembl:ENSG00000124207|HPRD:03217|Vega:OTTHUMG00000033046	20	20q13	CSE1 chromosome segregation 1-like (yeast)	protein-coding	CSE1L	CSE1 chromosome segregation 1-like (yeast)	O	cellular apoptosis susceptibility protein|chromosome segregation 1-like protein|exp2|exportin-2|importin-alpha re-exporter	20130512
9606	1435	CSF1	RP11-195M16.2	CSF-1|MCSF	HGNC:2432|MIM:120420|Ensembl:ENSG00000184371|HPRD:00388|Vega:OTTHUMG00000011646	1	1p13.3	colony stimulating factor 1 (macrophage)	protein-coding	CSF1	colony stimulating factor 1 (macrophage)	O	lanimostim|macrophage colony-stimulating factor 1	20130505
9606	1436	CSF1R	-	C-FMS|CD115|CSF-1R|CSFR|FIM2|FMS|HDLS|M-CSF-R	HGNC:2433|MIM:164770|Ensembl:ENSG00000182578|HPRD:01269|Vega:OTTHUMG00000130050	5	5q32	colony stimulating factor 1 receptor	protein-coding	CSF1R	colony stimulating factor 1 receptor	O	CD115 antigen|CSF-1 receptor|FMS proto-oncogene|McDonough feline sarcoma viral (v-fms) oncogene homolog|macrophage colony stimulating factor I receptor|macrophage colony-stimulating factor 1 receptor|proto-oncogene c-Fms	20130512
9606	1437	CSF2	-	GMCSF	HGNC:2434|MIM:138960|Ensembl:ENSG00000164400|HPRD:00734|Vega:OTTHUMG00000059637	5	5q31.1	colony stimulating factor 2 (granulocyte-macrophage)	protein-coding	CSF2	colony stimulating factor 2 (granulocyte-macrophage)	O	CSF|granulocyte-macrophage colony-stimulating factor|molgramostin|sargramostim	20130505
9606	1438	CSF2RA	-	CD116|CDw116|CSF2R|CSF2RAX|CSF2RAY|CSF2RX|CSF2RY|GM-CSF-R-alpha|GMCSFR|GMR|SMDP4	HGNC:2435|MIM:306250|MIM:425000|Ensembl:ENSG00000198223|HPRD:02381|Vega:OTTHUMG00000012533	X|Y	Xp22.32 and Yp11.3	colony stimulating factor 2 receptor, alpha, low-affinity (granulocyte-macrophage)	protein-coding	CSF2RA	colony stimulating factor 2 receptor, alpha, low-affinity (granulocyte-macrophage)	O	CD116 antigen|GM-CSF receptor alpha subunit|GMCSFR-alpha|GMR-alpha|colony stimulating factor 2 receptor alpha subunit|granulocyte-macrophage colony-stimulating factor receptor alpha chain|granulocyte-macrophage colony-stimulating factor receptor subunit alpha	20130505
9606	1439	CSF2RB	CITF22-45C1.4	CD131|CDw131|IL3RB|IL5RB|SMDP5	HGNC:2436|MIM:138981|Ensembl:ENSG00000100368|HPRD:00739|Vega:OTTHUMG00000150546	22	22q13.1	colony stimulating factor 2 receptor, beta, low-affinity (granulocyte-macrophage)	protein-coding	CSF2RB	colony stimulating factor 2 receptor, beta, low-affinity (granulocyte-macrophage)	O	GM-CSF/IL-3/IL-5 receptor common beta subunit|GM-CSF/IL-3/IL-5 receptor common beta-chain|colony-stimulating factor-2 receptor, beta, low-affinity|cytokine receptor common subunit beta|interleukin 3 receptor/granulocyte-macrophage colony stimulating factor 3 receptor, beta (high affinity)	20130505
[truncated: 42,675 more rows]
