# Supplementary material for: Protein-Protein Interactions: Gene Acronym Redundancies and Current Limitations Precluding Automated Data Integration
Source: Proteomes. 2013 May 31;1(1):3–24. doi: 10.3390/proteomes1010003 (PMC5314489; doi:10.3390/proteomes1010003)
Supplement: Supplementary file 2 [file proteomes-01-00003-s002.csv]

Entry	Entry name	Status	Protein names	Gene names	Organism	Length
P31946	1433B_HUMAN	reviewed	14-3-3 protein beta/alpha (Protein 1054) (Protein kinase C inhibitor protein 1) (KCIP-1) [Cleaved into: 14-3-3 protein beta/alpha, N-terminally processed]	YWHAB	Homo sapiens (Human)	246
P62258	1433E_HUMAN	reviewed	14-3-3 protein epsilon (14-3-3E)	YWHAE	Homo sapiens (Human)	255
Q04917	1433F_HUMAN	reviewed	14-3-3 protein eta (Protein AS1)	YWHAH YWHA1	Homo sapiens (Human)	246
P61981	1433G_HUMAN	reviewed	14-3-3 protein gamma (Protein kinase C inhibitor protein 1) (KCIP-1) [Cleaved into: 14-3-3 protein gamma, N-terminally processed]	YWHAG	Homo sapiens (Human)	247
P31947	1433S_HUMAN	reviewed	14-3-3 protein sigma (Epithelial cell marker protein 1) (Stratifin)	SFN HME1	Homo sapiens (Human)	248
P27348	1433T_HUMAN	reviewed	14-3-3 protein theta (14-3-3 protein T-cell) (14-3-3 protein tau) (Protein HS1)	YWHAQ	Homo sapiens (Human)	245
P63104	1433Z_HUMAN	reviewed	14-3-3 protein zeta/delta (Protein kinase C inhibitor protein 1) (KCIP-1)	YWHAZ	Homo sapiens (Human)	245
P30443	1A01_HUMAN	reviewed	HLA class I histocompatibility antigen, A-1 alpha chain (MHC class I antigen A*1)	HLA-A HLAA	Homo sapiens (Human)	365
P01892	1A02_HUMAN	reviewed	HLA class I histocompatibility antigen, A-2 alpha chain (MHC class I antigen A*2)	HLA-A HLAA	Homo sapiens (Human)	365
P04439	1A03_HUMAN	reviewed	HLA class I histocompatibility antigen, A-3 alpha chain (MHC class I antigen A*3)	HLA-A HLAA	Homo sapiens (Human)	365
P13746	1A11_HUMAN	reviewed	HLA class I histocompatibility antigen, A-11 alpha chain (MHC class I antigen A*11)	HLA-A HLAA	Homo sapiens (Human)	365
Q96QU6	1A1L1_HUMAN	reviewed	1-aminocyclopropane-1-carboxylate synthase-like protein 1 (ACC synthase-like protein 1)	ACCS PHACS	Homo sapiens (Human)	501
Q4AC99	1A1L2_HUMAN	reviewed	Probable inactive 1-aminocyclopropane-1-carboxylate synthase-like protein 2 (ACC synthase-like protein 2)	ACCSL	Homo sapiens (Human)	568
P30447	1A23_HUMAN	reviewed	HLA class I histocompatibility antigen, A-23 alpha chain (HLA class I histocompatibility antigen, A-9 alpha chain) (MHC class I antigen A*23)	HLA-A HLAA	Homo sapiens (Human)	365
P05534	1A24_HUMAN	reviewed	HLA class I histocompatibility antigen, A-24 alpha chain (Aw-24) (HLA class I histocompatibility antigen, A-9 alpha chain) (MHC class I antigen A*24)	HLA-A HLAA	Homo sapiens (Human)	365
P18462	1A25_HUMAN	reviewed	HLA class I histocompatibility antigen, A-25 alpha chain (HLA class I histocompatibility antigen, A-10 alpha chain) (MHC class I antigen A*25)	HLA-A HLAA	Homo sapiens (Human)	365
P30450	1A26_HUMAN	reviewed	HLA class I histocompatibility antigen, A-26 alpha chain (MHC class I antigen A*26)	HLA-A HLAA	Homo sapiens (Human)	365
P30512	1A29_HUMAN	reviewed	HLA class I histocompatibility antigen, A-29 alpha chain (Aw-19) (MHC class I antigen A*29)	HLA-A HLAA	Homo sapiens (Human)	365
P16188	1A30_HUMAN	reviewed	HLA class I histocompatibility antigen, A-30 alpha chain (MHC class I antigen A*30)	HLA-A HLAA	Homo sapiens (Human)	365
P16189	1A31_HUMAN	reviewed	HLA class I histocompatibility antigen, A-31 alpha chain (MHC class I antigen A*31)	HLA-A HLAA	Homo sapiens (Human)	365
P10314	1A32_HUMAN	reviewed	HLA class I histocompatibility antigen, A-32 alpha chain (MHC class I antigen A*32)	HLA-A HLAA	Homo sapiens (Human)	365
P16190	1A33_HUMAN	reviewed	HLA class I histocompatibility antigen, A-33 alpha chain (Aw-19) (Aw-33) (MHC class I antigen A*33)	HLA-A HLAA	Homo sapiens (Human)	365
P30453	1A34_HUMAN	reviewed	HLA class I histocompatibility antigen, A-34 alpha chain (Aw-34) (HLA class I histocompatibility antigen, A-10 alpha chain) (MHC class I antigen A*34)	HLA-A HLAA	Homo sapiens (Human)	365
P30455	1A36_HUMAN	reviewed	HLA class I histocompatibility antigen, A-36 alpha chain (Aw-36) (MHC class I antigen A*36)	HLA-A HLAA	Homo sapiens (Human)	365
P30456	1A43_HUMAN	reviewed	HLA class I histocompatibility antigen, A-43 alpha chain (Aw-43) (MHC class I antigen A*43)	HLA-A HLAA	Homo sapiens (Human)	365
P30457	1A66_HUMAN	reviewed	HLA class I histocompatibility antigen, A-66 alpha chain (Aw-66) (HLA class I histocompatibility antigen, A-10 alpha chain) (MHC class I antigen A*66)	HLA-A HLAA	Homo sapiens (Human)	365
P01891	1A68_HUMAN	reviewed	HLA class I histocompatibility antigen, A-68 alpha chain (Aw-68) (HLA class I histocompatibility antigen, A-28 alpha chain) (MHC class I antigen A*68)	HLA-A HLAA	Homo sapiens (Human)	365
P10316	1A69_HUMAN	reviewed	HLA class I histocompatibility antigen, A-69 alpha chain (Aw-69) (HLA class I histocompatibility antigen, A-28 alpha chain) (MHC class I antigen A*69)	HLA-A HLAA	Homo sapiens (Human)	365
P30459	1A74_HUMAN	reviewed	HLA class I histocompatibility antigen, A-74 alpha chain (Aw-19) (Aw-74) (MHC class I antigen A*74)	HLA-A HLAA	Homo sapiens (Human)	365
Q09160	1A80_HUMAN	reviewed	HLA class I histocompatibility antigen, A-80 alpha chain (Aw-80) (HLA class I histocompatibility antigen, A-1 alpha chain) (MHC class I antigen A*80)	HLA-A HLAA	Homo sapiens (Human)	365
P01889	1B07_HUMAN	reviewed	HLA class I histocompatibility antigen, B-7 alpha chain (MHC class I antigen B*7)	HLA-B HLAB	Homo sapiens (Human)	362
P30460	1B08_HUMAN	reviewed	HLA class I histocompatibility antigen, B-8 alpha chain (MHC class I antigen B*8)	HLA-B HLAB	Homo sapiens (Human)	362
P30461	1B13_HUMAN	reviewed	HLA class I histocompatibility antigen, B-13 alpha chain (MHC class I antigen B*13)	HLA-B HLAB	Homo sapiens (Human)	362
P30462	1B14_HUMAN	reviewed	HLA class I histocompatibility antigen, B-14 alpha chain (MHC class I antigen B*14)	HLA-B HLAB	Homo sapiens (Human)	362
P30464	1B15_HUMAN	reviewed	HLA class I histocompatibility antigen, B-15 alpha chain (MHC class I antigen B*15)	HLA-B HLAB	Homo sapiens (Human)	362
P30466	1B18_HUMAN	reviewed	HLA class I histocompatibility antigen, B-18 alpha chain (MHC class I antigen B*18)	HLA-B HLAB	Homo sapiens (Human)	362
P03989	1B27_HUMAN	reviewed	HLA class I histocompatibility antigen, B-27 alpha chain (MHC class I antigen B*27)	HLA-B HLAB	Homo sapiens (Human)	362
P30685	1B35_HUMAN	reviewed	HLA class I histocompatibility antigen, B-35 alpha chain (MHC class I antigen B*35)	HLA-B HLAB	Homo sapiens (Human)	362
P18463	1B37_HUMAN	reviewed	HLA class I histocompatibility antigen, B-37 alpha chain (MHC class I antigen B*37)	HLA-B HLAB	Homo sapiens (Human)	362
Q95365	1B38_HUMAN	reviewed	HLA class I histocompatibility antigen, B-38 alpha chain (Bw-4) (MHC class I antigen B*38)	HLA-B HLAB	Homo sapiens (Human)	362
P30475	1B39_HUMAN	reviewed	HLA class I histocompatibility antigen, B-39 alpha chain (MHC class I antigen B*39)	HLA-B HLAB	Homo sapiens (Human)	362
Q04826	1B40_HUMAN	reviewed	HLA class I histocompatibility antigen, B-40 alpha chain (Bw-60) (MHC class I antigen B*40)	HLA-B HLAB	Homo sapiens (Human)	362
P30479	1B41_HUMAN	reviewed	HLA class I histocompatibility antigen, B-41 alpha chain (Bw-41) (MHC class I antigen B*41)	HLA-B HLAB	Homo sapiens (Human)	362
P30480	1B42_HUMAN	reviewed	HLA class I histocompatibility antigen, B-42 alpha chain (MHC class I antigen B*42)	HLA-B HLAB	Homo sapiens (Human)	362
P30481	1B44_HUMAN	reviewed	HLA class I histocompatibility antigen, B-44 alpha chain (Bw-44) (MHC class I antigen B*44)	HLA-B HLAB	Homo sapiens (Human)	362
P30483	1B45_HUMAN	reviewed	HLA class I histocompatibility antigen, B-45 alpha chain (Bw-45) (MHC class I antigen B*45)	HLA-B HLAB	Homo sapiens (Human)	362
P30484	1B46_HUMAN	reviewed	HLA class I histocompatibility antigen, B-46 alpha chain (Bw-46) (MHC class I antigen B*46)	HLA-B HLAB	Homo sapiens (Human)	362
P30485	1B47_HUMAN	reviewed	HLA class I histocompatibility antigen, B-47 alpha chain (Bw-47) (MHC class I antigen B*47)	HLA-B HLAB	Homo sapiens (Human)	362
P30486	1B48_HUMAN	reviewed	HLA class I histocompatibility antigen, B-48 alpha chain (Bw-48) (MHC class I antigen B*48)	HLA-B HLAB	Homo sapiens (Human)	362
P30487	1B49_HUMAN	reviewed	HLA class I histocompatibility antigen, B-49 alpha chain (HLA class I histocompatibility antigen, B-21 alpha chain) (MHC class I antigen B*49)	HLA-B HLAB	Homo sapiens (Human)	362
P30488	1B50_HUMAN	reviewed	HLA class I histocompatibility antigen, B-50 alpha chain (Bw-50) (HLA class I histocompatibility antigen, B-21 alpha chain) (MHC class I antigen B*50)	HLA-B HLAB	Homo sapiens (Human)	362
P18464	1B51_HUMAN	reviewed	HLA class I histocompatibility antigen, B-51 alpha chain (MHC class I antigen B*51)	HLA-B HLAB	Homo sapiens (Human)	362
P30490	1B52_HUMAN	reviewed	HLA class I histocompatibility antigen, B-52 alpha chain (Bw-52) (HLA class I histocompatibility antigen, B-5 alpha chain) (MHC class I antigen B*52)	HLA-B HLAB	Homo sapiens (Human)	362
P30491	1B53_HUMAN	reviewed	HLA class I histocompatibility antigen, B-53 alpha chain (Bw-53) (MHC class I antigen B*53)	HLA-B HLAB	Homo sapiens (Human)	362
P30492	1B54_HUMAN	reviewed	HLA class I histocompatibility antigen, B-54 alpha chain (Bw-22) (Bw-54) (MHC class I antigen B*54)	HLA-B HLAB	Homo sapiens (Human)	362
P30493	1B55_HUMAN	reviewed	HLA class I histocompatibility antigen, B-55 alpha chain (Bw-55) (HLA class I histocompatibility antigen, B-12 alpha chain) (MHC class I antigen B*55)	HLA-B HLAB CDABP0067	Homo sapiens (Human)	362
P30495	1B56_HUMAN	reviewed	HLA class I histocompatibility antigen, B-56 alpha chain (Bw-22) (Bw-56) (MHC class I antigen B*56)	HLA-B HLAB	Homo sapiens (Human)	362
P18465	1B57_HUMAN	reviewed	HLA class I histocompatibility antigen, B-57 alpha chain (Bw-57) (MHC class I antigen B*57)	HLA-B HLAB	Homo sapiens (Human)	362
P10319	1B58_HUMAN	reviewed	HLA class I histocompatibility antigen, B-58 alpha chain (Bw-58) (MHC class I antigen B*58)	HLA-B HLAB	Homo sapiens (Human)	362
Q29940	1B59_HUMAN	reviewed	HLA class I histocompatibility antigen, B-59 alpha chain (MHC class I antigen B*59)	HLA-B HLAB	Homo sapiens (Human)	362
Q29836	1B67_HUMAN	reviewed	HLA class I histocompatibility antigen, B-67 alpha chain (MHC class I antigen B*67)	HLA-B HLAB	Homo sapiens (Human)	362
Q31612	1B73_HUMAN	reviewed	HLA class I histocompatibility antigen, B-73 alpha chain (MHC class I antigen B*73)	HLA-B HLAB	Homo sapiens (Human)	363
P30498	1B78_HUMAN	reviewed	HLA class I histocompatibility antigen, B-78 alpha chain (MHC class I antigen B*78)	HLA-B HLAB	Homo sapiens (Human)	362
Q31610	1B81_HUMAN	reviewed	HLA class I histocompatibility antigen, B-81 alpha chain (B'DT) (MHC class I antigen B*81)	HLA-B HLAB	Homo sapiens (Human)	362
Q29718	1B82_HUMAN	reviewed	HLA class I histocompatibility antigen, B-82 alpha chain (MHC class I antigen B*82)	HLA-B HLAB	Homo sapiens (Human)	362
P30499	1C01_HUMAN	reviewed	HLA class I histocompatibility antigen, Cw-1 alpha chain (MHC class I antigen Cw*1)	HLA-C HLAC	Homo sapiens (Human)	366
P30501	1C02_HUMAN	reviewed	HLA class I histocompatibility antigen, Cw-2 alpha chain (MHC class I antigen Cw*2)	HLA-C HLAC	Homo sapiens (Human)	366
P04222	1C03_HUMAN	reviewed	HLA class I histocompatibility antigen, Cw-3 alpha chain (MHC class I antigen Cw*3)	HLA-C HLAC	Homo sapiens (Human)	366
P30504	1C04_HUMAN	reviewed	HLA class I histocompatibility antigen, Cw-4 alpha chain (MHC class I antigen Cw*4)	HLA-C HLAC	Homo sapiens (Human)	366
Q9TNN7	1C05_HUMAN	reviewed	HLA class I histocompatibility antigen, Cw-5 alpha chain (MHC class I antigen Cw*5)	HLA-C HLAC	Homo sapiens (Human)	366
Q29963	1C06_HUMAN	reviewed	HLA class I histocompatibility antigen, Cw-6 alpha chain (MHC class I antigen Cw*6)	HLA-C HLAC	Homo sapiens (Human)	366
P10321	1C07_HUMAN	reviewed	HLA class I histocompatibility antigen, Cw-7 alpha chain (MHC class I antigen Cw*7)	HLA-C HLAC	Homo sapiens (Human)	366
P30505	1C08_HUMAN	reviewed	HLA class I histocompatibility antigen, Cw-8 alpha chain (MHC class I antigen Cw*8)	HLA-C HLAC	Homo sapiens (Human)	366
P30508	1C12_HUMAN	reviewed	HLA class I histocompatibility antigen, Cw-12 alpha chain (MHC class I antigen Cw*12)	HLA-C HLAC	Homo sapiens (Human)	366
P30510	1C14_HUMAN	reviewed	HLA class I histocompatibility antigen, Cw-14 alpha chain (MHC class I antigen Cw*14)	HLA-C HLAC	Homo sapiens (Human)	366
Q07000	1C15_HUMAN	reviewed	HLA class I histocompatibility antigen, Cw-15 alpha chain (MHC class I antigen Cw*15)	HLA-C HLAC	Homo sapiens (Human)	366
Q29960	1C16_HUMAN	reviewed	HLA class I histocompatibility antigen, Cw-16 alpha chain (MHC class I antigen Cw*16)	HLA-C HLAC	Homo sapiens (Human)	366
Q95604	1C17_HUMAN	reviewed	HLA class I histocompatibility antigen, Cw-17 alpha chain (MHC class I antigen Cw*17)	HLA-C D6S204 HLA-JY3 HLAC	Homo sapiens (Human)	372
Q29865	1C18_HUMAN	reviewed	HLA class I histocompatibility antigen, Cw-18 alpha chain (MHC class I antigen Cw*18)	HLA-C HLAC	Homo sapiens (Human)	366
Q15172	2A5A_HUMAN	reviewed	Serine/threonine-protein phosphatase 2A 56 kDa regulatory subunit alpha isoform (PP2A B subunit isoform B'-alpha) (PP2A B subunit isoform B56-alpha) (PP2A B subunit isoform PR61-alpha) (PR61alpha) (PP2A B subunit isoform R5-alpha)	PPP2R5A	Homo sapiens (Human)	486
Q15173	2A5B_HUMAN	reviewed	Serine/threonine-protein phosphatase 2A 56 kDa regulatory subunit beta isoform (PP2A B subunit isoform B'-beta) (PP2A B subunit isoform B56-beta) (PP2A B subunit isoform PR61-beta) (PP2A B subunit isoform R5-beta)	PPP2R5B	Homo sapiens (Human)	497
Q14738	2A5D_HUMAN	reviewed	Serine/threonine-protein phosphatase 2A 56 kDa regulatory subunit delta isoform (PP2A B subunit isoform B'-delta) (PP2A B subunit isoform B56-delta) (PP2A B subunit isoform PR61-delta) (PP2A B subunit isoform R5-delta)	PPP2R5D	Homo sapiens (Human)	602
Q16537	2A5E_HUMAN	reviewed	Serine/threonine-protein phosphatase 2A 56 kDa regulatory subunit epsilon isoform (PP2A B subunit isoform B'-epsilon) (PP2A B subunit isoform B56-epsilon) (PP2A B subunit isoform PR61-epsilon) (PP2A B subunit isoform R5-epsilon)	PPP2R5E	Homo sapiens (Human)	467
Q13362	2A5G_HUMAN	reviewed	Serine/threonine-protein phosphatase 2A 56 kDa regulatory subunit gamma isoform (PP2A B subunit isoform B'-gamma) (PP2A B subunit isoform B56-gamma) (PP2A B subunit isoform PR61-gamma) (PP2A B subunit isoform R5-gamma) (Renal carcinoma antigen NY-REN-29)	PPP2R5C KIAA0044	Homo sapiens (Human)	524
P30153	2AAA_HUMAN	reviewed	Serine/threonine-protein phosphatase 2A 65 kDa regulatory subunit A alpha isoform (Medium tumor antigen-associated 61 kDa protein) (PP2A subunit A isoform PR65-alpha) (PP2A subunit A isoform R1-alpha)	PPP2R1A	Homo sapiens (Human)	589
P30154	2AAB_HUMAN	reviewed	Serine/threonine-protein phosphatase 2A 65 kDa regulatory subunit A beta isoform (PP2A subunit A isoform PR65-beta) (PP2A subunit A isoform R1-beta)	PPP2R1B	Homo sapiens (Human)	601
P63151	2ABA_HUMAN	reviewed	Serine/threonine-protein phosphatase 2A 55 kDa regulatory subunit B alpha isoform (PP2A subunit B isoform B55-alpha) (PP2A subunit B isoform PR55-alpha) (PP2A subunit B isoform R2-alpha) (PP2A subunit B isoform alpha)	PPP2R2A	Homo sapiens (Human)	447
Q00005	2ABB_HUMAN	reviewed	Serine/threonine-protein phosphatase 2A 55 kDa regulatory subunit B beta isoform (PP2A subunit B isoform B55-beta) (PP2A subunit B isoform PR55-beta) (PP2A subunit B isoform R2-beta) (PP2A subunit B isoform beta)	PPP2R2B	Homo sapiens (Human)	443
Q66LE6	2ABD_HUMAN	reviewed	Serine/threonine-protein phosphatase 2A 55 kDa regulatory subunit B delta isoform (PP2A subunit B isoform B55-delta) (PP2A subunit B isoform PR55-delta) (PP2A subunit B isoform R2-delta) (PP2A subunit B isoform delta)	PPP2R2D KIAA1541	Homo sapiens (Human)	453
Q9Y2T4	2ABG_HUMAN	reviewed	Serine/threonine-protein phosphatase 2A 55 kDa regulatory subunit B gamma isoform (IMYPNO1) (PP2A subunit B isoform B55-gamma) (PP2A subunit B isoform PR55-gamma) (PP2A subunit B isoform R2-gamma) (PP2A subunit B isoform gamma)	PPP2R2C	Homo sapiens (Human)	447
P04229	2B11_HUMAN	reviewed	HLA class II histocompatibility antigen, DRB1-1 beta chain (MHC class II antigen DRB1*1) (DR-1) (DR1)	HLA-DRB1	Homo sapiens (Human)	266
P01912	2B13_HUMAN	reviewed	HLA class II histocompatibility antigen, DRB1-3 chain (Clone P2-beta-3) (MHC class II antigen DRB1*3)	HLA-DRB1	Homo sapiens (Human)	266
P13760	2B14_HUMAN	reviewed	HLA class II histocompatibility antigen, DRB1-4 beta chain (MHC class II antigen DRB1*4) (DR-4) (DR4)	HLA-DRB1	Homo sapiens (Human)	266
P13761	2B17_HUMAN	reviewed	HLA class II histocompatibility antigen, DRB1-7 beta chain (MHC class II antigen DRB1*7) (DR-7) (DR7)	HLA-DRB1	Homo sapiens (Human)	266
Q30134	2B18_HUMAN	reviewed	HLA class II histocompatibility antigen, DRB1-8 beta chain (MHC class II antigen DRB1*8) (DR-8) (DR8) (DRw8)	HLA-DRB1	Homo sapiens (Human)	266
Q9TQE0	2B19_HUMAN	reviewed	HLA class II histocompatibility antigen, DRB1-9 beta chain (MHC class II antigen DRB1*9) (DR-9) (DR9)	HLA-DRB1	Homo sapiens (Human)	266
Q30167	2B1A_HUMAN	reviewed	HLA class II histocompatibility antigen, DRB1-10 beta chain (DRw10) (MHC class II antigen DRB1*10)	HLA-DRB1	Homo sapiens (Human)	266
P20039	2B1B_HUMAN	reviewed	HLA class II histocompatibility antigen, DRB1-11 beta chain (DR-5) (DR5) (DRw11) (MHC class II antigen DRB1*11)	HLA-DRB1	Homo sapiens (Human)	266
Q95IE3	2B1C_HUMAN	reviewed	HLA class II histocompatibility antigen, DRB1-12 beta chain (MHC class II antigen DRB1*12) (DR-12) (DR12)	HLA-DRB1	Homo sapiens (Human)	266
Q5Y7A7	2B1D_HUMAN	reviewed	HLA class II histocompatibility antigen, DRB1-13 beta chain (MHC class II antigen DRB1*13) (DR-13) (DR13)	HLA-DRB1	Homo sapiens (Human)	266
Q9GIY3	2B1E_HUMAN	reviewed	HLA class II histocompatibility antigen, DRB1-14 beta chain (MHC class II antigen DRB1*14) (DR-14) (DR14)	HLA-DRB1	Homo sapiens (Human)	266
P01911	2B1F_HUMAN	reviewed	HLA class II histocompatibility antigen, DRB1-15 beta chain (DW2.2/DR2.2) (MHC class II antigen DRB1*15)	HLA-DRB1 HLA-DRB2	Homo sapiens (Human)	266
Q29974	2B1G_HUMAN	reviewed	HLA class II histocompatibility antigen, DRB1-16 beta chain (MHC class II antigen DRB1*16) (DR-16) (DR16)	HLA-DRB1	Homo sapiens (Human)	266
P14060	3BHS1_HUMAN	reviewed	3 beta-hydroxysteroid dehydrogenase/Delta 5-->4-isomerase type 1 (3 beta-hydroxysteroid dehydrogenase/Delta 5-->4-isomerase type I) (3-beta-HSD I) (Trophoblast antigen FDO161G) [Includes: 3-beta-hydroxy-Delta(5)-steroid dehydrogenase (EC 1.1.1.145) (3-beta-hydroxy-5-ene steroid dehydrogenase) (Progesterone reductase); Steroid Delta-isomerase (EC 5.3.3.1) (Delta-5-3-ketosteroid isomerase)]	HSD3B1 3BH HSDB3A	Homo sapiens (Human)	373
P26439	3BHS2_HUMAN	reviewed	3 beta-hydroxysteroid dehydrogenase/Delta 5-->4-isomerase type 2 (3 beta-hydroxysteroid dehydrogenase/Delta 5-->4-isomerase type II) (3-beta-HSD II) (3-beta-HSD adrenal and gonadal type) [Includes: 3-beta-hydroxy-Delta(5)-steroid dehydrogenase (EC 1.1.1.145) (3-beta-hydroxy-5-ene steroid dehydrogenase) (Progesterone reductase); Steroid Delta-isomerase (EC 5.3.3.1) (Delta-5-3-ketosteroid isomerase…	HSD3B2 HSDB3B	Homo sapiens (Human)	372
Q9H2F3	3BHS7_HUMAN	reviewed	3 beta-hydroxysteroid dehydrogenase type 7 (3 beta-hydroxysteroid dehydrogenase type VII) (3-beta-HSD VII) (3-beta-hydroxy-Delta(5)-C27 steroid oxidoreductase) (C(27) 3-beta-HSD) (EC 1.1.1.-) (Cholest-5-ene-3-beta,7-alpha-diol 3-beta-dehydrogenase) (EC 1.1.1.181)	HSD3B7	Homo sapiens (Human)	369
Q9Y3L3	3BP1_HUMAN	reviewed	SH3 domain-binding protein 1 (3BP-1)	SH3BP1	Homo sapiens (Human)	701
P78314	3BP2_HUMAN	reviewed	SH3 domain-binding protein 2 (3BP-2)	SH3BP2 3BP2 RES4-23	Homo sapiens (Human)	561
Q7L8J4	3BP5L_HUMAN	reviewed	SH3 domain-binding protein 5-like (SH3BP-5-like)	SH3BP5L KIAA1720 UNQ2766/PRO7133	Homo sapiens (Human)	393
O60239	3BP5_HUMAN	reviewed	SH3 domain-binding protein 5 (SH3BP-5) (SH3 domain-binding protein that preferentially associates with BTK)	SH3BP5 SAB	Homo sapiens (Human)	455
P46952	3HAO_HUMAN	reviewed	3-hydroxyanthranilate 3,4-dioxygenase (EC 1.13.11.6) (3-hydroxyanthranilate oxygenase) (3-HAO) (3-hydroxyanthranilic acid dioxygenase) (HAD)	HAAO	Homo sapiens (Human)	286
P31937	3HIDH_HUMAN	reviewed	3-hydroxyisobutyrate dehydrogenase, mitochondrial (HIBADH) (EC 1.1.1.31)	HIBADH	Homo sapiens (Human)	336
P29372	3MG_HUMAN	reviewed	DNA-3-methyladenine glycosylase (EC 3.2.2.21) (3-alkyladenine DNA glycosylase) (3-methyladenine DNA glycosidase) (ADPG) (N-methylpurine-DNA glycosylase)	MPG AAG ANPG MID1	Homo sapiens (Human)	298
P11171	41_HUMAN	reviewed	Protein 4.1 (P4.1) (4.1R) (Band 4.1) (EPB4.1)	EPB41 E41P	Homo sapiens (Human)	864
Q13541	4EBP1_HUMAN	reviewed	Eukaryotic translation initiation factor 4E-binding protein 1 (4E-BP1) (eIF4E-binding protein 1) (Phosphorylated heat- and acid-stable protein regulated by insulin 1) (PHAS-I)	EIF4EBP1	Homo sapiens (Human)	118
Q13542	4EBP2_HUMAN	reviewed	Eukaryotic translation initiation factor 4E-binding protein 2 (4E-BP2) (eIF4E-binding protein 2)	EIF4EBP2	Homo sapiens (Human)	120
O60516	4EBP3_HUMAN	reviewed	Eukaryotic translation initiation factor 4E-binding protein 3 (4E-BP3) (eIF4E-binding protein 3)	EIF4EBP3	Homo sapiens (Human)	100
Q9NRA8	4ET_HUMAN	reviewed	Eukaryotic translation initiation factor 4E transporter (4E-T) (eIF4E transporter) (Eukaryotic translation initiation factor 4E nuclear import factor 1)	EIF4ENIF1	Homo sapiens (Human)	985
P08195	4F2_HUMAN	reviewed	4F2 cell-surface antigen heavy chain (4F2hc) (4F2 heavy chain antigen) (Lymphocyte activation antigen 4F2 large subunit) (CD antigen CD98)	SLC3A2 MDU1	Homo sapiens (Human)	630
P08908	5HT1A_HUMAN	reviewed	5-hydroxytryptamine receptor 1A (5-HT-1A) (5-HT1A) (G-21) (Serotonin receptor 1A)	HTR1A ADRB2RL1 ADRBRL1	Homo sapiens (Human)	422
P28222	5HT1B_HUMAN	reviewed	5-hydroxytryptamine receptor 1B (5-HT-1B) (5-HT1B) (S12) (Serotonin 1D beta receptor) (5-HT-1D-beta) (Serotonin receptor 1B)	HTR1B HTR1DB	Homo sapiens (Human)	390
P28221	5HT1D_HUMAN	reviewed	5-hydroxytryptamine receptor 1D (5-HT-1D) (5-HT1D) (Serotonin 1D alpha receptor) (5-HT-1D-alpha) (Serotonin receptor 1D)	HTR1D HTR1DA HTRL	Homo sapiens (Human)	377
P28566	5HT1E_HUMAN	reviewed	5-hydroxytryptamine receptor 1E (5-HT-1E) (5-HT1E) (S31) (Serotonin receptor 1E)	HTR1E	Homo sapiens (Human)	365
P30939	5HT1F_HUMAN	reviewed	5-hydroxytryptamine receptor 1F (5-HT-1F) (5-HT1F) (Serotonin receptor 1F)	HTR1F HTR1EL	Homo sapiens (Human)	366
P28223	5HT2A_HUMAN	reviewed	5-hydroxytryptamine receptor 2A (5-HT-2) (5-HT-2A) (Serotonin receptor 2A)	HTR2A HTR2	Homo sapiens (Human)	471
P41595	5HT2B_HUMAN	reviewed	5-hydroxytryptamine receptor 2B (5-HT-2B) (5-HT2B) (Serotonin receptor 2B)	HTR2B	Homo sapiens (Human)	481
P28335	5HT2C_HUMAN	reviewed	5-hydroxytryptamine receptor 2C (5-HT-2C) (5-HT2C) (5-HTR2C) (5-hydroxytryptamine receptor 1C) (5-HT-1C) (5-HT1C) (Serotonin receptor 2C)	HTR2C HTR1C	Homo sapiens (Human)	458
P46098	5HT3A_HUMAN	reviewed	5-hydroxytryptamine receptor 3A (5-HT3-A) (5-HT3A) (5-hydroxytryptamine receptor 3) (5-HT-3) (5-HT3R) (Serotonin receptor 3A) (Serotonin-gated ion channel receptor)	HTR3A 5HT3R HTR3	Homo sapiens (Human)	478
O95264	5HT3B_HUMAN	reviewed	5-hydroxytryptamine receptor 3B (5-HT3-B) (5-HT3B) (Serotonin receptor 3B)	HTR3B	Homo sapiens (Human)	441
Q8WXA8	5HT3C_HUMAN	reviewed	5-hydroxytryptamine receptor 3C (5-HT3-C) (5-HT3C) (Serotonin receptor 3C)	HTR3C	Homo sapiens (Human)	447
Q70Z44	5HT3D_HUMAN	reviewed	5-hydroxytryptamine receptor 3D (5-HT3-D) (5-HT3D) (Serotonin receptor 3D)	HTR3D	Homo sapiens (Human)	454
A5X5Y0	5HT3E_HUMAN	reviewed	5-hydroxytryptamine receptor 3E (5-HT3-E) (5-HT3E) (Serotonin receptor 3E)	HTR3E	Homo sapiens (Human)	456
Q13639	5HT4R_HUMAN	reviewed	5-hydroxytryptamine receptor 4 (5-HT-4) (5-HT4) (Serotonin receptor 4)	HTR4	Homo sapiens (Human)	388
P47898	5HT5A_HUMAN	reviewed	5-hydroxytryptamine receptor 5A (5-HT-5) (5-HT-5A) (5-HT5A) (Serotonin receptor 5A)	HTR5A	Homo sapiens (Human)	357
P50406	5HT6R_HUMAN	reviewed	5-hydroxytryptamine receptor 6 (5-HT-6) (5-HT6) (Serotonin receptor 6)	HTR6	Homo sapiens (Human)	440
P34969	5HT7R_HUMAN	reviewed	5-hydroxytryptamine receptor 7 (5-HT-7) (5-HT7) (5-HT-X) (Serotonin receptor 7)	HTR7	Homo sapiens (Human)	479
Q9BXI3	5NT1A_HUMAN	reviewed	Cytosolic 5'-nucleotidase 1A (cN1A) (EC 3.1.3.5) (Cytosolic 5'-nucleotidase IA) (cN-I) (cN-IA)	NT5C1A	Homo sapiens (Human)	368
Q96P26	5NT1B_HUMAN	reviewed	Cytosolic 5'-nucleotidase 1B (cN1B) (EC 3.1.3.5) (Autoimmune infertility-related protein) (Cytosolic 5'-nucleotidase IB) (cN-IB)	NT5C1B AIRP FKSG85	Homo sapiens (Human)	610
Q969T7	5NT3B_HUMAN	reviewed	7-methylguanosine phosphate-specific 5'-nucleotidase (EC 3.1.3.-) (Cytosolic 5'-nucleotidase 3B) (Cytosolic 5'-nucleotidase III-like protein) (cN-III-like protein) (EC 3.1.3.5)	NT5C3B NT5C3L	Homo sapiens (Human)	300
Q9H0P0	5NT3_HUMAN	reviewed	Cytosolic 5'-nucleotidase 3 (EC 3.1.3.5) (Cytosolic 5'-nucleotidase III) (cN-III) (Pyrimidine 5'-nucleotidase 1) (P5'N-1) (P5N-1) (PN-I) (Uridine 5'-monophosphate hydrolase 1) (p36)	NT5C3 P5N1 UMPH1 HSPC233	Homo sapiens (Human)	336
P49902	5NTC_HUMAN	reviewed	Cytosolic purine 5'-nucleotidase (EC 3.1.3.5) (Cytosolic 5'-nucleotidase II)	NT5C2 NT5B NT5CP PNT5	Homo sapiens (Human)	561
P21589	5NTD_HUMAN	reviewed	5'-nucleotidase (5'-NT) (EC 3.1.3.5) (Ecto-5'-nucleotidase) (CD antigen CD73)	NT5E NT5 NTE	Homo sapiens (Human)	574
P56378	68MP_HUMAN	reviewed	6.8 kDa mitochondrial proteolipid	MP68 C14orf2 PRO1574	Homo sapiens (Human)	58
P52209	6PGD_HUMAN	reviewed	6-phosphogluconate dehydrogenase, decarboxylating (EC 1.1.1.44)	PGD PGDH	Homo sapiens (Human)	483
O95336	6PGL_HUMAN	reviewed	6-phosphogluconolactonase (6PGL) (EC 3.1.1.31)	PGLS	Homo sapiens (Human)	258
P05408	7B2_HUMAN	reviewed	Neuroendocrine protein 7B2 (Pituitary polypeptide) (Secretogranin V) (Secretogranin-5) (Secretory granule endocrine protein I) [Cleaved into: N-terminal peptide; C-terminal peptide]	SCG5 SGNE1	Homo sapiens (Human)	212
P36639	8ODP_HUMAN	reviewed	7,8-dihydro-8-oxoguanine triphosphatase (EC 3.6.1.55) (2-hydroxy-dATP diphosphatase) (EC 3.6.1.56) (8-oxo-dGTPase) (Nucleoside diphosphate-linked moiety X motif 1) (Nudix motif 1)	NUDT1 MTH1	Homo sapiens (Human)	197
P0DKL9	A14EL_HUMAN	reviewed	ARL14 effector protein-like	ARL14EPL	Homo sapiens (Human)	152
Q8IZ83	A16A1_HUMAN	reviewed	Aldehyde dehydrogenase family 16 member A1	ALDH16A1	Homo sapiens (Human)	802
Q676U5	A16L1_HUMAN	reviewed	Autophagy-related protein 16-1 (APG16-like 1)	ATG16L1 APG16L UNQ9393/PRO34307	Homo sapiens (Human)	607
Q8NAA4	A16L2_HUMAN	reviewed	Autophagy-related protein 16-2 (APG16-like 2) (WD repeat-containing protein 80)	ATG16L2 WDR80	Homo sapiens (Human)	619
P02763	A1AG1_HUMAN	reviewed	Alpha-1-acid glycoprotein 1 (AGP 1) (Orosomucoid-1) (OMD 1)	ORM1 AGP1	Homo sapiens (Human)	201
P19652	A1AG2_HUMAN	reviewed	Alpha-1-acid glycoprotein 2 (AGP 2) (Orosomucoid-2) (OMD 2)	ORM2 AGP2	Homo sapiens (Human)	201
P20848	A1ATR_HUMAN	reviewed	Putative alpha-1-antitrypsin-related protein (Serpin A2)	SERPINA2P ARGS ATR PIL SERPINA2	Homo sapiens (Human)	420
P01009	A1AT_HUMAN	reviewed	Alpha-1-antitrypsin (Alpha-1 protease inhibitor) (Alpha-1-antiproteinase) (Serpin A1) [Cleaved into: Short peptide from AAT (SPAAT)]	SERPINA1 AAT PI PRO0684 PRO2209	Homo sapiens (Human)	418
P04217	A1BG_HUMAN	reviewed	Alpha-1B-glycoprotein (Alpha-1-B glycoprotein)	A1BG	Homo sapiens (Human)	495
Q9NQ94	A1CF_HUMAN	reviewed	APOBEC1 complementation factor (APOBEC1-stimulating protein)	A1CF ACF ASP	Homo sapiens (Human)	594
Q5TYW2	A20A1_HUMAN	reviewed	Ankyrin repeat domain-containing protein 20A1	ANKRD20A1 ANKRD20A	Homo sapiens (Human)	823
Q5SQ80	A20A2_HUMAN	reviewed	Ankyrin repeat domain-containing protein 20A2	ANKRD20A2	Homo sapiens (Human)	823
Q5VUR7	A20A3_HUMAN	reviewed	Ankyrin repeat domain-containing protein 20A3	ANKRD20A3	Homo sapiens (Human)	823
Q4UJ75	A20A4_HUMAN	reviewed	Ankyrin repeat domain-containing protein 20A4	ANKRD20A4	Homo sapiens (Human)	823
A0PJZ0	A20A5_HUMAN	reviewed	Putative ankyrin repeat domain-containing protein 20A5 (Ankyrin repeat domain-containing protein 20A5 pseudogene)	ANKRD20A5P ANKRD20A5	Homo sapiens (Human)	165
Q96IX9	A26L1_HUMAN	reviewed	Putative ankyrin repeat domain-containing protein 26-like 1 (Ankyrin repeat domain-containing protein 36B pseudogene 1)	ANKRD36BP1 ANKRD26L1	Homo sapiens (Human)	119
P08697	A2AP_HUMAN	reviewed	Alpha-2-antiplasmin (Alpha-2-AP) (Alpha-2-plasmin inhibitor) (Alpha-2-PI) (Serpin F2)	SERPINF2 AAP PLI	Homo sapiens (Human)	491
P02750	A2GL_HUMAN	reviewed	Leucine-rich alpha-2-glycoprotein (LRG)	LRG1 LRG	Homo sapiens (Human)	347
P01023	A2MG_HUMAN	reviewed	Alpha-2-macroglobulin (Alpha-2-M) (C3 and PZP-like alpha-2-macroglobulin domain-containing protein 5)	A2M CPAMD5 FWP007	Homo sapiens (Human)	1474
A8K2U0	A2ML1_HUMAN	reviewed	Alpha-2-macroglobulin-like protein 1 (C3 and PZP-like alpha-2-macroglobulin domain-containing protein 9)	A2ML1 CPAMD9	Homo sapiens (Human)	1454
A7E2S9	A30BL_HUMAN	reviewed	Putative ankyrin repeat domain-containing protein 30B-like	ANKRD30BL NCRNA00164	Homo sapiens (Human)	258
Q9NPC4	A4GAT_HUMAN	reviewed	Lactosylceramide 4-alpha-galactosyltransferase (EC 2.4.1.228) (Alpha-1,4-N-acetylglucosaminyltransferase) (Alpha-1,4-galactosyltransferase) (Alpha4Gal-T1) (CD77 synthase) (Globotriaosylceramide synthase) (Gb3 synthase) (P1/Pk synthase) (UDP-galactose:beta-D-galactosyl-beta1-R 4-alpha-D-galactosyltransferase)	A4GALT A14GALT A4GALT1	Homo sapiens (Human)	353
Q9UNA3	A4GCT_HUMAN	reviewed	Alpha-1,4-N-acetylglucosaminyltransferase (Alpha4GnT) (EC 2.4.1.-)	A4GNT	Homo sapiens (Human)	340
P05067	A4_HUMAN	reviewed	Amyloid beta A4 protein (ABPP) (APPI) (APP) (Alzheimer disease amyloid protein) (Cerebral vascular amyloid peptide) (CVAP) (PreA4) (Protease nexin-II) (PN-II) [Cleaved into: N-APP; Soluble APP-alpha (S-APP-alpha); Soluble APP-beta (S-APP-beta); C99; Beta-amyloid protein 42 (Beta-APP42); Beta-amyloid protein 40 (Beta-APP40); C83; P3(42); P3(40); C80; Gamma-secretase C-terminal fragment 59 (Amyloid…	APP A4 AD1	Homo sapiens (Human)	770
Q96GX2	A7L3B_HUMAN	reviewed	Putative ataxin-7-like protein 3B	ATXN7L3B	Homo sapiens (Human)	97
P30542	AA1R_HUMAN	reviewed	Adenosine receptor A1	ADORA1	Homo sapiens (Human)	326
P29274	AA2AR_HUMAN	reviewed	Adenosine receptor A2a	ADORA2A ADORA2	Homo sapiens (Human)	412
P29275	AA2BR_HUMAN	reviewed	Adenosine receptor A2b	ADORA2B	Homo sapiens (Human)	332
Q6P2N6	AA3RB_HUMAN	reviewed	Protein ADORA3, isoform 3	ADORA3 UNQ1931/PRO4406	Homo sapiens (Human)	266
P33765	AA3R_HUMAN	reviewed	Adenosine receptor A3	ADORA3 UNQ1931/PRO4406	Homo sapiens (Human)	318
Q9NS82	AAA1_HUMAN	reviewed	Asc-type amino acid transporter 1 (Asc-1) (Solute carrier family 7 member 10)	SLC7A10 ASC1	Homo sapiens (Human)	523
P22760	AAAD_HUMAN	reviewed	Arylacetamide deacetylase (EC 3.1.1.3)	AADAC DAC	Homo sapiens (Human)	399
Q9NRG9	AAAS_HUMAN	reviewed	Aladin (Adracalin)	AAAS ADRACALA GL003	Homo sapiens (Human)	546
Q15758	AAAT_HUMAN	reviewed	Neutral amino acid transporter B(0) (ATB(0)) (Baboon M7 virus receptor) (RD114/simian type D retrovirus receptor) (Sodium-dependent neutral amino acid transporter type 2) (Solute carrier family 1 member 5)	SLC1A5 ASCT2 M7V1 RDR RDRC	Homo sapiens (Human)	541
Q86V21	AACS_HUMAN	reviewed	Acetoacetyl-CoA synthetase (EC 6.2.1.16) (Acyl-CoA synthetase family member 1) (Protein sur-5 homolog)	AACS ACSF1	Homo sapiens (Human)	672
P01011	AACT_HUMAN	reviewed	Alpha-1-antichymotrypsin (ACT) (Cell growth-inhibiting gene 24/25 protein) (Serpin A3) [Cleaved into: Alpha-1-antichymotrypsin His-Pro-less]	SERPINA3 AACT GIG24 GIG25	Homo sapiens (Human)	423
Q8N5Z0	AADAT_HUMAN	reviewed	Kynurenine/alpha-aminoadipate aminotransferase, mitochondrial (KAT/AadAT) (2-aminoadipate aminotransferase) (2-aminoadipate transaminase) (EC 2.6.1.39) (Alpha-aminoadipate aminotransferase) (AadAT) (Kynurenine aminotransferase II) (Kynurenine--oxoglutarate aminotransferase II) (Kynurenine--oxoglutarate transaminase 2) (EC 2.6.1.7) (Kynurenine--oxoglutarate transaminase II)	AADAT KAT2	Homo sapiens (Human)	425
Q7RTV5	AAED1_HUMAN	reviewed	Thioredoxin-like protein AAED1 (AhpC/TSA antioxidant enzyme domain-containing protein 1)	AAED1 C9orf21	Homo sapiens (Human)	226
Q6PD74	AAGAB_HUMAN	reviewed	Alpha- and gamma-adaptin-binding protein p34	AAGAB	Homo sapiens (Human)	315
Q2M2I8	AAK1_HUMAN	reviewed	AP2-associated protein kinase 1 (EC 2.7.11.1) (Adaptor-associated kinase 1)	AAK1 KIAA1048	Homo sapiens (Human)	961
Q9Y478	AAKB1_HUMAN	reviewed	5'-AMP-activated protein kinase subunit beta-1 (AMPK subunit beta-1) (AMPKb)	PRKAB1 AMPK	Homo sapiens (Human)	270
O43741	AAKB2_HUMAN	reviewed	5'-AMP-activated protein kinase subunit beta-2 (AMPK subunit beta-2)	PRKAB2	Homo sapiens (Human)	272
P54619	AAKG1_HUMAN	reviewed	5'-AMP-activated protein kinase subunit gamma-1 (AMPK gamma1) (AMPK subunit gamma-1) (AMPKg)	PRKAG1	Homo sapiens (Human)	331
Q9UGJ0	AAKG2_HUMAN	reviewed	5'-AMP-activated protein kinase subunit gamma-2 (AMPK gamma2) (AMPK subunit gamma-2) (H91620p)	PRKAG2	Homo sapiens (Human)	569
Q9UGI9	AAKG3_HUMAN	reviewed	5'-AMP-activated protein kinase subunit gamma-3 (AMPK gamma3) (AMPK subunit gamma-3)	PRKAG3 AMPKG3	Homo sapiens (Human)	489
Q9H7C9	AAMDC_HUMAN	reviewed	Mth938 domain-containing protein (Adipogenesis associated Mth938 domain-containing protein)	AAMDC C11orf67 PTD015	Homo sapiens (Human)	122
Q13685	AAMP_HUMAN	reviewed	Angio-associated migratory cell protein	AAMP	Homo sapiens (Human)	434
Q13131	AAPK1_HUMAN	reviewed	5'-AMP-activated protein kinase catalytic subunit alpha-1 (AMPK subunit alpha-1) (EC 2.7.11.1) (Acetyl-CoA carboxylase kinase) (ACACA kinase) (EC 2.7.11.27) (Hydroxymethylglutaryl-CoA reductase kinase) (HMGCR kinase) (EC 2.7.11.31) (Tau-protein kinase PRKAA1) (EC 2.7.11.26)	PRKAA1 AMPK1	Homo sapiens (Human)	559
P54646	AAPK2_HUMAN	reviewed	5'-AMP-activated protein kinase catalytic subunit alpha-2 (AMPK subunit alpha-2) (EC 2.7.11.1) (Acetyl-CoA carboxylase kinase) (ACACA kinase) (EC 2.7.11.27) (Hydroxymethylglutaryl-CoA reductase kinase) (HMGCR kinase) (EC 2.7.11.31)	PRKAA2 AMPK AMPK2	Homo sapiens (Human)	552
Q9Y312	AAR2_HUMAN	reviewed	Protein AAR2 homolog (AAR2 splicing factor homolog)	AAR2 C20orf4 CGI-23 PRO0225	Homo sapiens (Human)	384
Q4LEZ3	AARD_HUMAN	reviewed	Alanine and arginine-rich domain-containing protein	AARD C8orf85	Homo sapiens (Human)	155
P86434	AAS1_HUMAN	reviewed	Putative uncharacterized protein ADORA2A-AS1 (ADORA2A antisense RNA 1) (ADORA2A antisense gene protein 1)	ADORA2A-AS1 C22orf45	Homo sapiens (Human)	159
Q9BTE6	AASD1_HUMAN	reviewed	Alanyl-tRNA editing protein Aarsd1 (Alanyl-tRNA synthetase domain-containing protein 1)	AARSD1	Homo sapiens (Human)	412
Q9UDR5	AASS_HUMAN	reviewed	Alpha-aminoadipic semialdehyde synthase, mitochondrial (LKR/SDH) [Includes: Lysine ketoglutarate reductase (LKR) (LOR) (EC 1.5.1.8); Saccharopine dehydrogenase (SDH) (EC 1.5.1.9)]	AASS	Homo sapiens (Human)	926
Q8NHS2	AATC2_HUMAN	reviewed	Putative aspartate aminotransferase, cytoplasmic 2 (EC 2.6.1.-) (Glutamate oxaloacetate transaminase 1-like protein 1) (Transaminase A-like protein 1)	GOT1L1	Homo sapiens (Human)	421
P17174	AATC_HUMAN	reviewed	Aspartate aminotransferase, cytoplasmic (cAspAT) (EC 2.6.1.1) (EC 2.6.1.3) (Cysteine aminotransferase, cytoplasmic) (Cysteine transaminase, cytoplasmic) (cCAT) (Glutamate oxaloacetate transaminase 1) (Transaminase A)	GOT1	Homo sapiens (Human)	413
Q9NY61	AATF_HUMAN	reviewed	Protein AATF (Apoptosis-antagonizing transcription factor) (Rb-binding protein Che-1)	AATF CHE1 DED HSPC277	Homo sapiens (Human)	560
P00505	AATM_HUMAN	reviewed	Aspartate aminotransferase, mitochondrial (mAspAT) (EC 2.6.1.1) (EC 2.6.1.7) (Fatty acid-binding protein) (FABP-1) (Glutamate oxaloacetate transaminase 2) (Kynurenine aminotransferase 4) (Kynurenine aminotransferase IV) (Kynurenine--oxoglutarate transaminase 4) (Kynurenine--oxoglutarate transaminase IV) (Plasma membrane-associated fatty acid-binding protein) (FABPpm) (Transaminase A)	GOT2	Homo sapiens (Human)	430
Q7Z5M8	AB12B_HUMAN	reviewed	Abhydrolase domain-containing protein 12B (EC 3.-.-.-)	ABHD12B C14orf29	Homo sapiens (Human)	362
Q7Z5R6	AB1IP_HUMAN	reviewed	Amyloid beta A4 precursor protein-binding family B member 1-interacting protein (APBB1-interacting protein 1) (Proline-rich EVH1 ligand 1) (PREL-1) (Proline-rich protein 73) (Rap1-GTP-interacting adapter molecule) (RIAM) (Retinoic acid-responsive proline-rich protein 1) (RARP-1)	APBB1IP PREL1 RARP1 RIAM	Homo sapiens (Human)	666
P31941	ABC3A_HUMAN	reviewed	DNA dC->dU-editing enzyme APOBEC-3A (A3A) (EC 3.5.4.-) (Phorbolin-1)	APOBEC3A	Homo sapiens (Human)	199
Q9UH17	ABC3B_HUMAN	reviewed	DNA dC->dU-editing enzyme APOBEC-3B (A3B) (EC 3.5.4.-) (Phorbolin-1-related protein) (Phorbolin-2/3)	APOBEC3B	Homo sapiens (Human)	382
Q9NRW3	ABC3C_HUMAN	reviewed	DNA dC->dU-editing enzyme APOBEC-3C (A3C) (EC 3.5.4.-) (APOBEC1-like) (Phorbolin I)	APOBEC3C APOBEC1L PBI	Homo sapiens (Human)	190
Q96AK3	ABC3D_HUMAN	reviewed	DNA dC->dU-editing enzyme APOBEC-3D (A3D) (EC 3.5.4.-)	APOBEC3D	Homo sapiens (Human)	386
Q8IUX4	ABC3F_HUMAN	reviewed	DNA dC->dU-editing enzyme APOBEC-3F (EC 3.5.4.-) (Apolipoprotein B mRNA-editing enzyme catalytic polypeptide-like 3F) (A3F)	APOBEC3F	Homo sapiens (Human)	373
Q9HC16	ABC3G_HUMAN	reviewed	DNA dC->dU-editing enzyme APOBEC-3G (EC 3.5.4.14) (APOBEC-related cytidine deaminase) (APOBEC-related protein) (ARCD) (APOBEC-related protein 9) (ARP-9) (CEM-15) (CEM15) (Deoxycytidine deaminase) (A3G)	APOBEC3G MDS019	Homo sapiens (Human)	384
Q6NTF7	ABC3H_HUMAN	reviewed	DNA dC->dU-editing enzyme APOBEC-3H (EC 3.5.4.-) (APOBEC-related protein 10) (ARP-10) (Apolipoprotein B mRNA-editing enzyme catalytic polypeptide-like 3H) (A3H)	APOBEC3H	Homo sapiens (Human)	200
O95477	ABCA1_HUMAN	reviewed	ATP-binding cassette sub-family A member 1 (ATP-binding cassette transporter 1) (ABC-1) (ATP-binding cassette 1) (Cholesterol efflux regulatory protein)	ABCA1 ABC1 CERP	Homo sapiens (Human)	2261
Q9BZC7	ABCA2_HUMAN	reviewed	ATP-binding cassette sub-family A member 2 (ATP-binding cassette transporter 2) (ATP-binding cassette 2)	ABCA2 ABC2 KIAA1062	Homo sapiens (Human)	2435
Q99758	ABCA3_HUMAN	reviewed	ATP-binding cassette sub-family A member 3 (ABC-C transporter) (ATP-binding cassette transporter 3) (ATP-binding cassette 3)	ABCA3 ABC3	Homo sapiens (Human)	1704
P78363	ABCA4_HUMAN	reviewed	Retinal-specific ATP-binding cassette transporter (ATP-binding cassette sub-family A member 4) (RIM ABC transporter) (RIM protein) (RmP) (Stargardt disease protein)	ABCA4 ABCR	Homo sapiens (Human)	2273
Q8WWZ7	ABCA5_HUMAN	reviewed	ATP-binding cassette sub-family A member 5	ABCA5 KIAA1888	Homo sapiens (Human)	1642
Q8N139	ABCA6_HUMAN	reviewed	ATP-binding cassette sub-family A member 6	ABCA6	Homo sapiens (Human)	1617
Q8IZY2	ABCA7_HUMAN	reviewed	ATP-binding cassette sub-family A member 7 (ABCA-SSN) (Autoantigen SS-N) (Macrophage ABC transporter)	ABCA7	Homo sapiens (Human)	2146
O94911	ABCA8_HUMAN	reviewed	ATP-binding cassette sub-family A member 8	ABCA8 KIAA0822	Homo sapiens (Human)	1581
Q8IUA7	ABCA9_HUMAN	reviewed	ATP-binding cassette sub-family A member 9	ABCA9	Homo sapiens (Human)	1624
Q8WWZ4	ABCAA_HUMAN	reviewed	ATP-binding cassette sub-family A member 10	ABCA10	Homo sapiens (Human)	1543
Q4W5N1	ABCAB_HUMAN	reviewed	Putative ATP-binding cassette sub-family A member 11	ABCA11P ABCA11	Homo sapiens (Human)	156
Q86UK0	ABCAC_HUMAN	reviewed	ATP-binding cassette sub-family A member 12 (ATP-binding cassette transporter 12) (ATP-binding cassette 12)	ABCA12 ABC12	Homo sapiens (Human)	2595
Q86UQ4	ABCAD_HUMAN	reviewed	ATP-binding cassette sub-family A member 13	ABCA13	Homo sapiens (Human)	5058
Q2M3G0	ABCB5_HUMAN	reviewed	ATP-binding cassette sub-family B member 5 (ABCB5 P-gp) (P-glycoprotein ABCB5)	ABCB5	Homo sapiens (Human)	812
Q9NP58	ABCB6_HUMAN	reviewed	ATP-binding cassette sub-family B member 6, mitochondrial (Mitochondrial ABC transporter 3) (Mt-ABC transporter 3) (P-glycoprotein-related protein) (Ubiquitously-expressed mammalian ABC half transporter)	ABCB6 MTABC3 PRP UMAT	Homo sapiens (Human)	842
O75027	ABCB7_HUMAN	reviewed	ATP-binding cassette sub-family B member 7, mitochondrial (ATP-binding cassette transporter 7) (ABC transporter 7 protein)	ABCB7 ABC7	Homo sapiens (Human)	752
Q9NUT2	ABCB8_HUMAN	reviewed	ATP-binding cassette sub-family B member 8, mitochondrial (Mitochondrial ATP-binding cassette 1) (M-ABC1)	ABCB8 MABC1	Homo sapiens (Human)	735
Q9NP78	ABCB9_HUMAN	reviewed	ATP-binding cassette sub-family B member 9 (ATP-binding cassette transporter 9) (ABC transporter 9 protein) (hABCB9) (TAP-like protein) (TAPL)	ABCB9 KIAA1520	Homo sapiens (Human)	766
Q9NRK6	ABCBA_HUMAN	reviewed	ATP-binding cassette sub-family B member 10, mitochondrial (ATP-binding cassette transporter 10) (ABC transporter 10 protein) (Mitochondrial ATP-binding cassette 2) (M-ABC2)	ABCB10	Homo sapiens (Human)	738
O95342	ABCBB_HUMAN	reviewed	Bile salt export pump (ATP-binding cassette sub-family B member 11)	ABCB11 BSEP	Homo sapiens (Human)	1321
Q09428	ABCC8_HUMAN	reviewed	ATP-binding cassette sub-family C member 8 (Sulfonylurea receptor 1)	ABCC8 HRINS SUR SUR1	Homo sapiens (Human)	1581
O60706	ABCC9_HUMAN	reviewed	ATP-binding cassette sub-family C member 9 (Sulfonylurea receptor 2)	ABCC9 SUR2	Homo sapiens (Human)	1549
Q96J66	ABCCB_HUMAN	reviewed	ATP-binding cassette sub-family C member 11 (Multidrug resistance-associated protein 8)	ABCC11 MRP8	Homo sapiens (Human)	1382
Q9NSE7	ABCCD_HUMAN	reviewed	Putative ATP-binding cassette sub-family C member 13	ABCC13 C21orf73 PRED6	Homo sapiens (Human)	274
P33897	ABCD1_HUMAN	reviewed	ATP-binding cassette sub-family D member 1 (Adrenoleukodystrophy protein) (ALDP)	ABCD1 ALD	Homo sapiens (Human)	745
Q9UBJ2	ABCD2_HUMAN	reviewed	ATP-binding cassette sub-family D member 2 (Adrenoleukodystrophy-like 1) (Adrenoleukodystrophy-related protein) (hALDR)	ABCD2 ALD1 ALDL1 ALDR ALDRP	Homo sapiens (Human)	740
P28288	ABCD3_HUMAN	reviewed	ATP-binding cassette sub-family D member 3 (70 kDa peroxisomal membrane protein) (PMP70)	ABCD3 PMP70 PXMP1	Homo sapiens (Human)	659
O14678	ABCD4_HUMAN	reviewed	ATP-binding cassette sub-family D member 4 (PMP70-related protein) (P70R) (Peroxisomal membrane protein 1-like) (PXMP1-L) (Peroxisomal membrane protein 69) (PMP69)	ABCD4 PXMP1L	Homo sapiens (Human)	606
P61221	ABCE1_HUMAN	reviewed	ATP-binding cassette sub-family E member 1 (2'-5'-oligoadenylate-binding protein) (HuHP68) (RNase L inhibitor) (Ribonuclease 4 inhibitor) (RNS4I)	ABCE1 RLI RNASEL1 RNASELI RNS4I OK/SW-cl.40	Homo sapiens (Human)	599
Q8NE71	ABCF1_HUMAN	reviewed	ATP-binding cassette sub-family F member 1 (ATP-binding cassette 50) (TNF-alpha-stimulated ABC protein)	ABCF1 ABC50	Homo sapiens (Human)	845
Q9UG63	ABCF2_HUMAN	reviewed	ATP-binding cassette sub-family F member 2 (Iron-inhibited ABC transporter 2)	ABCF2 HUSSY-18	Homo sapiens (Human)	623
Q9NUQ8	ABCF3_HUMAN	reviewed	ATP-binding cassette sub-family F member 3	ABCF3	Homo sapiens (Human)	709
P45844	ABCG1_HUMAN	reviewed	ATP-binding cassette sub-family G member 1 (ATP-binding cassette transporter 8) (White protein homolog)	ABCG1 ABC8 WHT1	Homo sapiens (Human)	678
Q9UNQ0	ABCG2_HUMAN	reviewed	ATP-binding cassette sub-family G member 2 (Breast cancer resistance protein) (CDw338) (Mitoxantrone resistance-associated protein) (Placenta-specific ATP-binding cassette transporter) (CD antigen CD338)	ABCG2 ABCP BCRP BCRP1 MXR	Homo sapiens (Human)	655
Q9H172	ABCG4_HUMAN	reviewed	ATP-binding cassette sub-family G member 4	ABCG4 WHITE2	Homo sapiens (Human)	646
Q9H222	ABCG5_HUMAN	reviewed	ATP-binding cassette sub-family G member 5 (Sterolin-1)	ABCG5	Homo sapiens (Human)	651
Q9H221	ABCG8_HUMAN	reviewed	ATP-binding cassette sub-family G member 8 (Sterolin-2)	ABCG8	Homo sapiens (Human)	673
Q8N2K0	ABD12_HUMAN	reviewed	Monoacylglycerol lipase ABHD12 (EC 3.1.1.23) (2-arachidonoylglycerol hydrolase) (Abhydrolase domain-containing protein 12)	ABHD12 C20orf22	Homo sapiens (Human)	398
P41238	ABEC1_HUMAN	reviewed	C->U-editing enzyme APOBEC-1 (EC 3.5.4.-) (Apolipoprotein B mRNA-editing enzyme 1) (HEPR)	APOBEC1	Homo sapiens (Human)	236
Q9Y235	ABEC2_HUMAN	reviewed	Probable C->U-editing enzyme APOBEC-2 (EC 3.5.4.-)	APOBEC2	Homo sapiens (Human)	224
Q8WW27	ABEC4_HUMAN	reviewed	Putative C->U-editing enzyme APOBEC-4 (EC 3.5.4.-) (Apolipoprotein B mRNA-editing enzyme catalytic polypeptide-like 4)	APOBEC4 C1orf169	Homo sapiens (Human)	367
Q6UXT9	ABH15_HUMAN	reviewed	Abhydrolase domain-containing protein 15 (EC 3.1.1.-)	ABHD15 UNQ6510/PRO21435	Homo sapiens (Human)	468
Q96SE0	ABHD1_HUMAN	reviewed	Abhydrolase domain-containing protein 1 (EC 3.1.1.-) (Lung alpha/beta hydrolase 1)	ABHD1 LABH1	Homo sapiens (Human)	405
P08910	ABHD2_HUMAN	reviewed	Abhydrolase domain-containing protein 2 (EC 3.1.1.-) (Lung alpha/beta hydrolase 2) (Protein PHPS1-2)	ABHD2 LABH2	Homo sapiens (Human)	425
Q8WU67	ABHD3_HUMAN	reviewed	Abhydrolase domain-containing protein 3 (EC 3.1.1.-) (Lung alpha/beta hydrolase 3)	ABHD3 LABH3	Homo sapiens (Human)	409
Q8TB40	ABHD4_HUMAN	reviewed	Abhydrolase domain-containing protein 4 (EC 3.1.1.-) (Alpha/beta-hydrolase 4) (Lyso-N-acylphosphatidylethanolamine lipase)	ABHD4	Homo sapiens (Human)	342
Q8WTS1	ABHD5_HUMAN	reviewed	1-acylglycerol-3-phosphate O-acyltransferase ABHD5 (EC 2.3.1.51) (Abhydrolase domain-containing protein 5) (Lipid droplet-binding protein CGI-58)	ABHD5 NCIE2 CGI-58	Homo sapiens (Human)	349
Q9BV23	ABHD6_HUMAN	reviewed	Monoacylglycerol lipase ABHD6 (EC 3.1.1.23) (2-arachidonoylglycerol hydrolase) (Abhydrolase domain-containing protein 6)	ABHD6	Homo sapiens (Human)	337
Q96I13	ABHD8_HUMAN	reviewed	Abhydrolase domain-containing protein 8 (EC 3.-.-.-)	ABHD8	Homo sapiens (Human)	439
Q9NUJ1	ABHDA_HUMAN	reviewed	Mycophenolic acid acyl-glucuronide esterase, mitochondrial (EC 3.1.1.93) (Alpha/beta hydrolase domain-containing protein 10) (Abhydrolase domain-containing protein 10)	ABHD10	Homo sapiens (Human)	306
Q8NFV4	ABHDB_HUMAN	reviewed	Alpha/beta hydrolase domain-containing protein 11 (Abhydrolase domain-containing protein 11) (EC 3.-.-.-) (Williams-Beuren syndrome chromosomal region 21 protein)	ABHD11 WBSCR21 PP1226	Homo sapiens (Human)	315
Q7L211	ABHDD_HUMAN	reviewed	Alpha/beta hydrolase domain-containing protein 13 (Abhydrolase domain-containing protein 13) (EC 3.-.-.-)	ABHD13 C13orf6	Homo sapiens (Human)	337
Q9BUJ0	ABHEA_HUMAN	reviewed	Alpha/beta hydrolase domain-containing protein 14A (Abhydrolase domain-containing protein 14A) (EC 3.-.-.-)	ABHD14A UNQ1913/PRO4373	Homo sapiens (Human)	271
Q96IU4	ABHEB_HUMAN	reviewed	Alpha/beta hydrolase domain-containing protein 14B (Abhydrolase domain-containing protein 14B) (EC 3.-.-.-) (CCG1-interacting factor B)	ABHD14B CIB	Homo sapiens (Human)	210
O95870	ABHGA_HUMAN	reviewed	Abhydrolase domain-containing protein 16A (EC 3.-.-.-) (HLA-B-associated transcript 5) (Protein G5)	ABHD16A BAT5 G5 NG26 PP199	Homo sapiens (Human)	558
Q9H3Z7	ABHGB_HUMAN	reviewed	Abhydrolase domain-containing protein 16B (EC 3.-.-.-)	ABHD16B C20orf135	Homo sapiens (Human)	469
Q8IZP0	ABI1_HUMAN	reviewed	Abl interactor 1 (Abelson interactor 1) (Abi-1) (Abl-binding protein 4) (AblBP4) (Eps8 SH3 domain-binding protein) (Eps8-binding protein) (Nap1-binding protein) (Nap1BP) (Spectrin SH3 domain-binding protein 1) (e3B1)	ABI1 SSH3BP1	Homo sapiens (Human)	508
Q9NYB9	ABI2_HUMAN	reviewed	Abl interactor 2 (Abelson interactor 2) (Abi-2) (Abl-binding protein 3) (AblBP3) (Arg-binding protein 1) (ArgBP1)	ABI2 ARGBPIA	Homo sapiens (Human)	513
Q9P2A4	ABI3_HUMAN	reviewed	ABI gene family member 3 (New molecule including SH3) (Nesh)	ABI3 NESH	Homo sapiens (Human)	366
P00519	ABL1_HUMAN	reviewed	Tyrosine-protein kinase ABL1 (EC 2.7.10.2) (Abelson murine leukemia viral oncogene homolog 1) (Abelson tyrosine-protein kinase 1) (Proto-oncogene c-Abl) (p150)	ABL1 ABL JTK7	Homo sapiens (Human)	1130
P42684	ABL2_HUMAN	reviewed	Abelson tyrosine-protein kinase 2 (EC 2.7.10.2) (Abelson murine leukemia viral oncogene homolog 2) (Abelson-related gene protein) (Tyrosine-protein kinase ARG)	ABL2 ABLL ARG	Homo sapiens (Human)	1182
O14639	ABLM1_HUMAN	reviewed	Actin-binding LIM protein 1 (abLIM-1) (Actin-binding LIM protein family member 1) (Actin-binding double zinc finger protein) (LIMAB1) (Limatin)	ABLIM1 ABLIM KIAA0059 LIMAB1	Homo sapiens (Human)	778
Q6H8Q1	ABLM2_HUMAN	reviewed	Actin-binding LIM protein 2 (abLIM-2) (Actin-binding LIM protein family member 2)	ABLIM2 KIAA1808	Homo sapiens (Human)	611
O94929	ABLM3_HUMAN	reviewed	Actin-binding LIM protein 3 (abLIM-3) (Actin-binding LIM protein family member 3)	ABLIM3 KIAA0843 HMFN1661	Homo sapiens (Human)	683
P19801	ABP1_HUMAN	reviewed	Amiloride-sensitive amine oxidase [copper-containing] (DAO) (Diamine oxidase) (EC 1.4.3.22) (Amiloride-binding protein) (ABP) (Histaminase) (Kidney amine oxidase) (KAO)	ABP1 AOC1 DAO1	Homo sapiens (Human)	751
Q9P1F3	ABRAL_HUMAN	reviewed	Costars family protein ABRACL (ABRA C-terminal-like protein)	ABRACL C6orf115 HSPC280 PRO2013	Homo sapiens (Human)	81
Q8N0Z2	ABRA_HUMAN	reviewed	Actin-binding Rho-activating protein (Striated muscle activator of Rho-dependent signaling) (STARS)	ABRA	Homo sapiens (Human)	381
Q12979	ABR_HUMAN	reviewed	Active breakpoint cluster region-related protein	ABR	Homo sapiens (Human)	859
Q9ULW3	ABT1_HUMAN	reviewed	Activator of basal transcription 1 (hABT1) (Basal transcriptional activator)	ABT1	Homo sapiens (Human)	272
Q969K4	ABTB1_HUMAN	reviewed	Ankyrin repeat and BTB/POZ domain-containing protein 1 (Elongation factor 1A-binding protein)	ABTB1 BPOZ PP2259	Homo sapiens (Human)	478
Q8N961	ABTB2_HUMAN	reviewed	Ankyrin repeat and BTB/POZ domain-containing protein 2	ABTB2	Homo sapiens (Human)	1025
Q13085	ACACA_HUMAN	reviewed	Acetyl-CoA carboxylase 1 (ACC1) (EC 6.4.1.2) (ACC-alpha) [Includes: Biotin carboxylase (EC 6.3.4.14)]	ACACA ACAC ACC1 ACCA	Homo sapiens (Human)	2346
O00763	ACACB_HUMAN	reviewed	Acetyl-CoA carboxylase 2 (EC 6.4.1.2) (ACC-beta) [Includes: Biotin carboxylase (EC 6.3.4.14)]	ACACB ACC2 ACCB	Homo sapiens (Human)	2458
Q9UKU7	ACAD8_HUMAN	reviewed	Isobutyryl-CoA dehydrogenase, mitochondrial (EC 1.3.99.-) (Activator-recruited cofactor 42 kDa component) (ARC42) (Acyl-CoA dehydrogenase family member 8) (ACAD-8)	ACAD8 ARC42 IBD	Homo sapiens (Human)	415
Q9H845	ACAD9_HUMAN	reviewed	Acyl-CoA dehydrogenase family member 9, mitochondrial (ACAD-9) (EC 1.3.99.-)	ACAD9	Homo sapiens (Human)	621
P28330	ACADL_HUMAN	reviewed	Long-chain specific acyl-CoA dehydrogenase, mitochondrial (LCAD) (EC 1.3.8.8)	ACADL	Homo sapiens (Human)	430
P11310	ACADM_HUMAN	reviewed	Medium-chain specific acyl-CoA dehydrogenase, mitochondrial (MCAD) (EC 1.3.8.7)	ACADM	Homo sapiens (Human)	421
P16219	ACADS_HUMAN	reviewed	Short-chain specific acyl-CoA dehydrogenase, mitochondrial (SCAD) (EC 1.3.8.1) (Butyryl-CoA dehydrogenase)	ACADS	Homo sapiens (Human)	412
P49748	ACADV_HUMAN	reviewed	Very long-chain specific acyl-CoA dehydrogenase, mitochondrial (VLCAD) (EC 1.3.8.9)	ACADVL VLCAD	Homo sapiens (Human)	655
Q15027	ACAP1_HUMAN	reviewed	Arf-GAP with coiled-coil, ANK repeat and PH domain-containing protein 1 (Centaurin-beta-1) (Cnt-b1)	ACAP1 CENTB1 KIAA0050	Homo sapiens (Human)	740
Q15057	ACAP2_HUMAN	reviewed	Arf-GAP with coiled-coil, ANK repeat and PH domain-containing protein 2 (Centaurin-beta-2) (Cnt-b2)	ACAP2 CENTB2 KIAA0041	Homo sapiens (Human)	778
Q96P50	ACAP3_HUMAN	reviewed	Arf-GAP with coiled-coil, ANK repeat and PH domain-containing protein 3 (Centaurin-beta-5) (Cnt-b5)	ACAP3 CENTB5 KIAA1716	Homo sapiens (Human)	834
O00400	ACATN_HUMAN	reviewed	Acetyl-coenzyme A transporter 1 (AT-1) (Acetyl-CoA transporter 1) (Solute carrier family 33 member 1)	SLC33A1 ACATN AT1	Homo sapiens (Human)	549
Q8NC06	ACBD4_HUMAN	reviewed	Acyl-CoA-binding domain-containing protein 4	ACBD4 HMFT0700	Homo sapiens (Human)	268
Q5T8D3	ACBD5_HUMAN	reviewed	Acyl-CoA-binding domain-containing protein 5	ACBD5 KIAA1996	Homo sapiens (Human)	534
Q9BR61	ACBD6_HUMAN	reviewed	Acyl-CoA-binding domain-containing protein 6	ACBD6	Homo sapiens (Human)	282
Q8N6N7	ACBD7_HUMAN	reviewed	Acyl-CoA-binding domain-containing protein 7	ACBD7	Homo sapiens (Human)	88
Q96GR2	ACBG1_HUMAN	reviewed	Long-chain-fatty-acid--CoA ligase ACSBG1 (EC 6.2.1.3) (Acyl-CoA synthetase bubblegum family member 1) (hBG1) (hsBG) (hsBGM) (Lipidosin)	ACSBG1 BGM KIAA0631 LPD	Homo sapiens (Human)	724
Q5FVE4	ACBG2_HUMAN	reviewed	Long-chain-fatty-acid--CoA ligase ACSBG2 (EC 6.2.1.3) (Acyl-CoA synthetase bubblegum family member 2) (Bubblegum-related protein) (PRTD-NY3)	ACSBG2 BGR UNQ2443/PRO5005	Homo sapiens (Human)	666
P07108	ACBP_HUMAN	reviewed	Acyl-CoA-binding protein (ACBP) (Diazepam-binding inhibitor) (DBI) (Endozepine) (EP)	DBI	Homo sapiens (Human)	87
Q6JQN1	ACD10_HUMAN	reviewed	Acyl-CoA dehydrogenase family member 10 (ACAD-10) (EC 1.3.99.-)	ACAD10	Homo sapiens (Human)	1059
Q709F0	ACD11_HUMAN	reviewed	Acyl-CoA dehydrogenase family member 11 (ACAD-11) (EC 1.3.99.-)	ACAD11	Homo sapiens (Human)	780
P45954	ACDSB_HUMAN	reviewed	Short/branched chain specific acyl-CoA dehydrogenase, mitochondrial (SBCAD) (EC 1.3.8.5) (2-methyl branched chain acyl-CoA dehydrogenase) (2-MEBCAD) (2-methylbutyryl-coenzyme A dehydrogenase) (2-methylbutyryl-CoA dehydrogenase)	ACADSB	Homo sapiens (Human)	432
Q96AP0	ACD_HUMAN	reviewed	Adrenocortical dysplasia protein homolog (POT1 and TIN2-interacting protein)	ACD PIP1 PTOP TINT1 TPP1	Homo sapiens (Human)	544
Q9BYF1	ACE2_HUMAN	reviewed	Angiotensin-converting enzyme 2 (EC 3.4.17.23) (ACE-related carboxypeptidase) (Angiotensin-converting enzyme homolog) (ACEH) (Metalloprotease MPROT15) [Cleaved into: Processed angiotensin-converting enzyme 2]	ACE2 UNQ868/PRO1885	Homo sapiens (Human)	805
Q8TDN7	ACER1_HUMAN	reviewed	Alkaline ceramidase 1 (AlkCDase 1) (Alkaline CDase 1) (EC 3.5.1.23) (Acylsphingosine deacylase 3) (N-acylsphingosine amidohydrolase 3)	ACER1 ASAH3	Homo sapiens (Human)	264
Q5QJU3	ACER2_HUMAN	reviewed	Alkaline ceramidase 2 (AlkCDase 2) (Alkaline CDase 2) (haCER2) (EC 3.5.1.23) (Acylsphingosine deacylase 3-like) (N-acylsphingosine amidohydrolase 3-like)	ACER2 ASAH3L PP11646	Homo sapiens (Human)	275
Q9NUN7	ACER3_HUMAN	reviewed	Alkaline ceramidase 3 (AlkCDase 3) (Alkaline CDase 3) (EC 3.5.1.-) (Alkaline dihydroceramidase SB89) (Alkaline phytoceramidase) (aPHC)	ACER3 APHC PHCA	Homo sapiens (Human)	267
P22303	ACES_HUMAN	reviewed	Acetylcholinesterase (AChE) (EC 3.1.1.7)	ACHE	Homo sapiens (Human)	614
P12821	ACE_HUMAN	reviewed	Angiotensin-converting enzyme (ACE) (EC 3.2.1.-) (EC 3.4.15.1) (Dipeptidyl carboxypeptidase I) (Kininase II) (CD antigen CD143) [Cleaved into: Angiotensin-converting enzyme, soluble form]	ACE DCP DCP1	Homo sapiens (Human)	1306
Q9GZZ6	ACH10_HUMAN	reviewed	Neuronal acetylcholine receptor subunit alpha-10 (Nicotinic acetylcholine receptor subunit alpha-10) (NACHR alpha-10)	CHRNA10 NACHRA10	Homo sapiens (Human)	450
Q15822	ACHA2_HUMAN	reviewed	Neuronal acetylcholine receptor subunit alpha-2	CHRNA2	Homo sapiens (Human)	529
P32297	ACHA3_HUMAN	reviewed	Neuronal acetylcholine receptor subunit alpha-3	CHRNA3 NACHRA3	Homo sapiens (Human)	505
P43681	ACHA4_HUMAN	reviewed	Neuronal acetylcholine receptor subunit alpha-4	CHRNA4 NACRA4	Homo sapiens (Human)	627
P30532	ACHA5_HUMAN	reviewed	Neuronal acetylcholine receptor subunit alpha-5	CHRNA5 NACHRA5	Homo sapiens (Human)	468
Q15825	ACHA6_HUMAN	reviewed	Neuronal acetylcholine receptor subunit alpha-6	CHRNA6	Homo sapiens (Human)	494
P36544	ACHA7_HUMAN	reviewed	Neuronal acetylcholine receptor subunit alpha-7	CHRNA7 NACHRA7	Homo sapiens (Human)	502
Q9UGM1	ACHA9_HUMAN	reviewed	Neuronal acetylcholine receptor subunit alpha-9 (Nicotinic acetylcholine receptor subunit alpha-9) (NACHR alpha-9)	CHRNA9 NACHRA9	Homo sapiens (Human)	479
P02708	ACHA_HUMAN	reviewed	Acetylcholine receptor subunit alpha	CHRNA1 ACHRA CHNRA	Homo sapiens (Human)	482
P17787	ACHB2_HUMAN	reviewed	Neuronal acetylcholine receptor subunit beta-2	CHRNB2	Homo sapiens (Human)	502
Q05901	ACHB3_HUMAN	reviewed	Neuronal acetylcholine receptor subunit beta-3	CHRNB3	Homo sapiens (Human)	458
P30926	ACHB4_HUMAN	reviewed	Neuronal acetylcholine receptor subunit beta-4	CHRNB4	Homo sapiens (Human)	498
P11230	ACHB_HUMAN	reviewed	Acetylcholine receptor subunit beta	CHRNB1 ACHRB CHRNB	Homo sapiens (Human)	501
Q07001	ACHD_HUMAN	reviewed	Acetylcholine receptor subunit delta	CHRND ACHRD	Homo sapiens (Human)	517
Q04844	ACHE_HUMAN	reviewed	Acetylcholine receptor subunit epsilon	CHRNE ACHRE	Homo sapiens (Human)	493
P07510	ACHG_HUMAN	reviewed	Acetylcholine receptor subunit gamma	CHRNG ACHRG	Homo sapiens (Human)	517
Q9UKV3	ACINU_HUMAN	reviewed	Apoptotic chromatin condensation inducer in the nucleus (Acinus)	ACIN1 ACINUS KIAA0670	Homo sapiens (Human)	1341
Q07912	ACK1_HUMAN	reviewed	Activated CDC42 kinase 1 (ACK-1) (EC 2.7.10.2) (EC 2.7.11.1) (Tyrosine kinase non-receptor protein 2)	TNK2 ACK1	Homo sapiens (Human)	1038
Q5JWF8	ACL10_HUMAN	reviewed	Actin-like protein 10	ACTL10 C20orf134	Homo sapiens (Human)	245
O96019	ACL6A_HUMAN	reviewed	Actin-like protein 6A (53 kDa BRG1-associated factor A) (Actin-related protein Baf53a) (ArpNbeta) (BRG1-associated factor 53A) (BAF53A) (INO80 complex subunit K)	ACTL6A BAF53 BAF53A INO80K	Homo sapiens (Human)	429
O94805	ACL6B_HUMAN	reviewed	Actin-like protein 6B (53 kDa BRG1-associated factor B) (Actin-related protein Baf53b) (ArpNalpha) (BRG1-associated factor 53B) (BAF53B)	ACTL6B ACTL6 BAF53B	Homo sapiens (Human)	426
Q9Y615	ACL7A_HUMAN	reviewed	Actin-like protein 7A (Actin-like-7-alpha)	ACTL7A	Homo sapiens (Human)	435
Q9Y614	ACL7B_HUMAN	reviewed	Actin-like protein 7B (Actin-like-7-beta)	ACTL7B	Homo sapiens (Human)	415
P53396	ACLY_HUMAN	reviewed	ATP-citrate synthase (EC 2.3.3.8) (ATP-citrate (pro-S-)-lyase) (ACL) (Citrate cleavage enzyme)	ACLY	Homo sapiens (Human)	1101
P11229	ACM1_HUMAN	reviewed	Muscarinic acetylcholine receptor M1	CHRM1	Homo sapiens (Human)	460
P08172	ACM2_HUMAN	reviewed	Muscarinic acetylcholine receptor M2	CHRM2	Homo sapiens (Human)	466
P20309	ACM3_HUMAN	reviewed	Muscarinic acetylcholine receptor M3	CHRM3	Homo sapiens (Human)	590
P08173	ACM4_HUMAN	reviewed	Muscarinic acetylcholine receptor M4	CHRM4	Homo sapiens (Human)	479
P08912	ACM5_HUMAN	reviewed	Muscarinic acetylcholine receptor M5	CHRM5	Homo sapiens (Human)	532
Q8TDX5	ACMSD_HUMAN	reviewed	2-amino-3-carboxymuconate-6-semialdehyde decarboxylase (EC 4.1.1.45) (Picolinate carboxylase)	ACMSD	Homo sapiens (Human)	336
Q9NRP4	ACN9_HUMAN	reviewed	Protein ACN9 homolog, mitochondrial	ACN9 DC11	Homo sapiens (Human)	125
Q8WXI4	ACO11_HUMAN	reviewed	Acyl-coenzyme A thioesterase 11 (Acyl-CoA thioesterase 11) (EC 3.1.2.-) (Acyl-CoA thioester hydrolase 11) (Adipose-associated thioesterase) (Brown fat-inducible thioesterase) (BFIT)	ACOT11 BFIT KIAA0707 THEA	Homo sapiens (Human)	607
Q8WYK0	ACO12_HUMAN	reviewed	Acyl-coenzyme A thioesterase 12 (Acyl-CoA thioesterase 12) (EC 3.1.2.1) (Acyl-CoA thioester hydrolase 12) (Cytoplasmic acetyl-CoA hydrolase 1) (CACH-1) (hCACH-1) (START domain-containing protein 15) (StARD15)	ACOT12 CACH CACH1 STARD15	Homo sapiens (Human)	555
Q9NPJ3	ACO13_HUMAN	reviewed	Acyl-coenzyme A thioesterase 13 (Acyl-CoA thioesterase 13) (EC 3.1.2.-) (Thioesterase superfamily member 2)	ACOT13 THEM2 HT012 PNAS-27	Homo sapiens (Human)	140
Q8N1Q8	ACO15_HUMAN	reviewed	Acyl-coenzyme A thioesterase THEM5 (Acyl-CoA thioesterase THEM5) (EC 3.1.2.2) (Acyl-coenzyme A thioesterase 15) (Thioesterase superfamily member 5)	THEM5 ACOT15	Homo sapiens (Human)	247
P21399	ACOC_HUMAN	reviewed	Cytoplasmic aconitate hydratase (Aconitase) (EC 4.2.1.3) (Citrate hydro-lyase) (Ferritin repressor protein) (Iron regulatory protein 1) (IRP1) (Iron-responsive element-binding protein 1) (IRE-BP 1)	ACO1 IREB1	Homo sapiens (Human)	889
O00767	ACOD_HUMAN	reviewed	Acyl-CoA desaturase (EC 1.14.19.1) (Delta(9)-desaturase) (Delta-9 desaturase) (Fatty acid desaturase) (Stearoyl-CoA desaturase)	SCD	Homo sapiens (Human)	359
Q99798	ACON_HUMAN	reviewed	Aconitate hydratase, mitochondrial (Aconitase) (EC 4.2.1.3) (Citrate hydro-lyase)	ACO2	Homo sapiens (Human)	780
Q86TX2	ACOT1_HUMAN	reviewed	Acyl-coenzyme A thioesterase 1 (Acyl-CoA thioesterase 1) (EC 3.1.2.2) (CTE-I) (CTE-Ib) (Inducible cytosolic acyl-coenzyme A thioester hydrolase) (Long chain acyl-CoA thioester hydrolase) (Long chain acyl-CoA hydrolase)	ACOT1 CTE1	Homo sapiens (Human)	421
P49753	ACOT2_HUMAN	reviewed	Acyl-coenzyme A thioesterase 2, mitochondrial (Acyl-CoA thioesterase 2) (EC 3.1.2.2) (Acyl-coenzyme A thioester hydrolase 2a) (CTE-Ia) (Long-chain acyl-CoA thioesterase 2) (ZAP128)	ACOT2 PTE2 PTE2A	Homo sapiens (Human)	483
Q8N9L9	ACOT4_HUMAN	reviewed	Acyl-coenzyme A thioesterase 4 (Acyl-CoA thioesterase 4) (EC 3.1.2.2) (PTE-2b) (Peroxisomal acyl coenzyme A thioester hydrolase Ib) (Peroxisomal long-chain acyl-CoA thioesterase Ib) (PTE-Ib)	ACOT4 PTE2B PTEIB	Homo sapiens (Human)	421
Q3I5F7	ACOT6_HUMAN	reviewed	Putative acyl-coenzyme A thioesterase 6 (Putative acyl-CoA thioesterase 6) (EC 3.1.2.-)	ACOT6 C14orf42	Homo sapiens (Human)	207
O14734	ACOT8_HUMAN	reviewed	Acyl-coenzyme A thioesterase 8 (Acyl-CoA thioesterase 8) (EC 3.1.2.27) (Choloyl-coenzyme A thioesterase) (HIV-Nef-associated acyl-CoA thioesterase) (PTE-2) (Peroxisomal acyl-coenzyme A thioester hydrolase 1) (PTE-1) (Peroxisomal long-chain acyl-CoA thioesterase 1) (Thioesterase II) (hACTE-III) (hACTEIII) (hTE)	ACOT8 ACTEIII PTE1 PTE2	Homo sapiens (Human)	319
Q9Y305	ACOT9_HUMAN	reviewed	Acyl-coenzyme A thioesterase 9, mitochondrial (Acyl-CoA thioesterase 9) (EC 3.1.2.-) (Acyl-CoA thioester hydrolase 9)	ACOT9 CGI-16	Homo sapiens (Human)	439
Q15067	ACOX1_HUMAN	reviewed	Peroxisomal acyl-coenzyme A oxidase 1 (AOX) (EC 1.3.3.6) (Palmitoyl-CoA oxidase) (Straight-chain acyl-CoA oxidase) (SCOX)	ACOX1 ACOX	Homo sapiens (Human)	660
Q99424	ACOX2_HUMAN	reviewed	Peroxisomal acyl-coenzyme A oxidase 2 (EC 1.17.99.3) (3-alpha,7-alpha,12-alpha-trihydroxy-5-beta-cholestanoyl-CoA 24-hydroxylase) (3-alpha,7-alpha,12-alpha-trihydroxy-5-beta-cholestanoyl-CoA oxidase) (Trihydroxycoprostanoyl-CoA oxidase) (THCA-CoA oxidase) (THCCox)	ACOX2	Homo sapiens (Human)	681
O15254	ACOX3_HUMAN	reviewed	Peroxisomal acyl-coenzyme A oxidase 3 (EC 1.3.3.6) (Branched-chain acyl-CoA oxidase) (BRCACox) (Pristanoyl-CoA oxidase)	ACOX3 BRCOX PRCOX	Homo sapiens (Human)	700
Q9NUZ1	ACOXL_HUMAN	reviewed	Acyl-coenzyme A oxidase-like protein (Acyl-CoA oxidase-like protein) (EC 1.3.3.-)	ACOXL	Homo sapiens (Human)	547
P13798	ACPH_HUMAN	reviewed	Acylamino-acid-releasing enzyme (AARE) (EC 3.4.19.1) (Acyl-peptide hydrolase) (APH) (Acylaminoacyl-peptidase) (Oxidized protein hydrolase) (OPH)	APEH D3F15S2 D3S48E DNF15S2	Homo sapiens (Human)	732
Q8TE99	ACPL2_HUMAN	reviewed	Acid phosphatase-like protein 2 (EC 3.1.3.2)	ACPL2 UNQ370/PRO706	Homo sapiens (Human)	480
O14561	ACPM_HUMAN	reviewed	Acyl carrier protein, mitochondrial (ACP) (CI-SDAP) (NADH-ubiquinone oxidoreductase 9.6 kDa subunit)	NDUFAB1	Homo sapiens (Human)	156
Q8NEB7	ACRBP_HUMAN	reviewed	Acrosin-binding protein (Cancer/testis antigen 23) (CT23) (Cancer/testis antigen OY-TES-1) (Proacrosin-binding protein sp32)	ACRBP	Homo sapiens (Human)	543
Q96QF7	ACRC_HUMAN	reviewed	Acidic repeat-containing protein	ACRC	Homo sapiens (Human)	691
P10323	ACRO_HUMAN	reviewed	Acrosin (EC 3.4.21.10) [Cleaved into: Acrosin light chain; Acrosin heavy chain]	ACR ACRS	Homo sapiens (Human)	421
Q08AH3	ACS2A_HUMAN	reviewed	Acyl-coenzyme A synthetase ACSM2A, mitochondrial (EC 6.2.1.2) (Acyl-CoA synthetase medium-chain family member 2A) (Butyrate--CoA ligase 2A) (Butyryl-coenzyme A synthetase 2A) (Middle-chain acyl-CoA synthetase 2A)	ACSM2A ACSM2 MACS2	Homo sapiens (Human)	577
Q68CK6	ACS2B_HUMAN	reviewed	Acyl-coenzyme A synthetase ACSM2B, mitochondrial (EC 6.2.1.2) (Acyl-CoA synthetase medium-chain family member 2B) (Butyrate--CoA ligase 2B) (Butyryl-coenzyme A synthetase 2B) (Middle-chain acyl-CoA synthetase 2B) (Xenobiotic/medium-chain fatty acid-CoA ligase HXM-A)	ACSM2B ACSM2 HYST1046	Homo sapiens (Human)	577
Q9NUB1	ACS2L_HUMAN	reviewed	Acetyl-coenzyme A synthetase 2-like, mitochondrial (EC 6.2.1.1) (Acetate--CoA ligase 2) (Acetyl-CoA synthetase 2) (AceCS2) (Acyl-CoA synthetase short-chain family member 1)	ACSS1 ACAS2L KIAA1846	Homo sapiens (Human)	689
Q9NR19	ACSA_HUMAN	reviewed	Acetyl-coenzyme A synthetase, cytoplasmic (EC 6.2.1.1) (Acetate--CoA ligase) (Acetyl-CoA synthetase) (ACS) (AceCS) (Acyl-CoA synthetase short-chain family member 2) (Acyl-activating enzyme)	ACSS2 ACAS2	Homo sapiens (Human)	701
Q96CM8	ACSF2_HUMAN	reviewed	Acyl-CoA synthetase family member 2, mitochondrial (EC 6.2.1.-)	ACSF2 UNQ493/PRO1009	Homo sapiens (Human)	615
Q4G176	ACSF3_HUMAN	reviewed	Acyl-CoA synthetase family member 3, mitochondrial (EC 6.2.1.-)	ACSF3 PSEC0197	Homo sapiens (Human)	576
Q4L235	ACSF4_HUMAN	reviewed	Acyl-CoA synthetase family member 4 (EC 6.2.1.-) (Aminoadipate-semialdehyde dehydrogenase) (Protein NRPS998)	AASDH ACSF4 U26 HSPC318	Homo sapiens (Human)	1098
P33121	ACSL1_HUMAN	reviewed	Long-chain-fatty-acid--CoA ligase 1 (EC 6.2.1.3) (Acyl-CoA synthetase 1) (ACS1) (Long-chain acyl-CoA synthetase 1) (LACS 1) (Long-chain acyl-CoA synthetase 2) (LACS 2) (Long-chain fatty acid-CoA ligase 2) (Palmitoyl-CoA ligase 1) (Palmitoyl-CoA ligase 2)	ACSL1 FACL1 FACL2 LACS LACS1 LACS2	Homo sapiens (Human)	698
O95573	ACSL3_HUMAN	reviewed	Long-chain-fatty-acid--CoA ligase 3 (EC 6.2.1.3) (Long-chain acyl-CoA synthetase 3) (LACS 3)	ACSL3 ACS3 FACL3 LACS3	Homo sapiens (Human)	720
O60488	ACSL4_HUMAN	reviewed	Long-chain-fatty-acid--CoA ligase 4 (EC 6.2.1.3) (Long-chain acyl-CoA synthetase 4) (LACS 4)	ACSL4 ACS4 FACL4 LACS4	Homo sapiens (Human)	711
Q9ULC5	ACSL5_HUMAN	reviewed	Long-chain-fatty-acid--CoA ligase 5 (EC 6.2.1.3) (Long-chain acyl-CoA synthetase 5) (LACS 5)	ACSL5 ACS5 FACL5 UNQ633/PRO1250	Homo sapiens (Human)	683
Q9UKU0	ACSL6_HUMAN	reviewed	Long-chain-fatty-acid--CoA ligase 6 (EC 6.2.1.3) (Long-chain acyl-CoA synthetase 6) (LACS 6)	ACSL6 ACS2 FACL6 KIAA0837 LACS5	Homo sapiens (Human)	697
Q08AH1	ACSM1_HUMAN	reviewed	Acyl-coenzyme A synthetase ACSM1, mitochondrial (EC 6.2.1.2) (Acyl-CoA synthetase medium-chain family member 1) (Butyrate--CoA ligase 1) (Butyryl-coenzyme A synthetase 1) (Lipoate-activating enzyme) (Middle-chain acyl-CoA synthetase 1)	ACSM1 BUCS1 LAE MACS1	Homo sapiens (Human)	577
Q53FZ2	ACSM3_HUMAN	reviewed	Acyl-coenzyme A synthetase ACSM3, mitochondrial (EC 6.2.1.2) (Acyl-CoA synthetase medium-chain family member 3) (Butyrate--CoA ligase 3) (Butyryl-coenzyme A synthetase 3) (Middle-chain acyl-CoA synthetase 3) (Protein SA homolog)	ACSM3 SAH	Homo sapiens (Human)	586
P0C7M7	ACSM4_HUMAN	reviewed	Acyl-coenzyme A synthetase ACSM4, mitochondrial (EC 6.2.1.2) (Acyl-CoA synthetase medium-chain family member 4)	ACSM4	Homo sapiens (Human)	580
Q6NUN0	ACSM5_HUMAN	reviewed	Acyl-coenzyme A synthetase ACSM5, mitochondrial (EC 6.2.1.2) (Acyl-CoA synthetase medium-chain family member 5)	ACSM5 MACS3	Homo sapiens (Human)	579
Q6P461	ACSM6_HUMAN	reviewed	Acyl-coenzyme A synthetase ACSM6, mitochondrial (EC 6.2.1.2)	ACSM6 C10orf129	Homo sapiens (Human)	480
Q9H6R3	ACSS3_HUMAN	reviewed	Acyl-CoA synthetase short-chain family member 3, mitochondrial (EC 6.2.1.1) (Acyl-CoA synthetase short-chain family member 3)	ACSS3	Homo sapiens (Human)	686
P62736	ACTA_HUMAN	reviewed	Actin, aortic smooth muscle (Alpha-actin-2) (Cell growth-inhibiting gene 46 protein)	ACTA2 ACTSA ACTVS GIG46	Homo sapiens (Human)	377
Q562R1	ACTBL_HUMAN	reviewed	Beta-actin-like protein 2 (Kappa-actin)	ACTBL2	Homo sapiens (Human)	376
Q9BYX7	ACTBM_HUMAN	reviewed	Putative beta-actin-like protein 3 (Kappa-actin) (POTE ankyrin domain family member K)	POTEKP ACTBL3 FKSG30	Homo sapiens (Human)	375
P60709	ACTB_HUMAN	reviewed	Actin, cytoplasmic 1 (Beta-actin) [Cleaved into: Actin, cytoplasmic 1, N-terminally processed]	ACTB	Homo sapiens (Human)	375
P68032	ACTC_HUMAN	reviewed	Actin, alpha cardiac muscle 1 (Alpha-cardiac actin)	ACTC1 ACTC	Homo sapiens (Human)	377
P63261	ACTG_HUMAN	reviewed	Actin, cytoplasmic 2 (Gamma-actin) [Cleaved into: Actin, cytoplasmic 2, N-terminally processed]	ACTG1 ACTB ACTG	Homo sapiens (Human)	375
Q01718	ACTHR_HUMAN	reviewed	Adrenocorticotropic hormone receptor (ACTH receptor) (ACTH-R) (Adrenocorticotropin receptor) (Melanocortin receptor 2) (MC2-R)	MC2R ACTHR	Homo sapiens (Human)	297
P63267	ACTH_HUMAN	reviewed	Actin, gamma-enteric smooth muscle (Alpha-actin-3) (Gamma-2-actin) (Smooth muscle gamma-actin)	ACTG2 ACTA3 ACTL3 ACTSG	Homo sapiens (Human)	376
Q9H568	ACTL8_HUMAN	reviewed	Actin-like protein 8 (Cancer/testis antigen 57) (CT57)	ACTL8	Homo sapiens (Human)	366
Q8TC94	ACTL9_HUMAN	reviewed	Actin-like protein 9	ACTL9 ACTL7C HSD21	Homo sapiens (Human)	416
P12814	ACTN1_HUMAN	reviewed	Alpha-actinin-1 (Alpha-actinin cytoskeletal isoform) (F-actin cross-linking protein) (Non-muscle alpha-actinin-1)	ACTN1	Homo sapiens (Human)	892
P35609	ACTN2_HUMAN	reviewed	Alpha-actinin-2 (Alpha-actinin skeletal muscle isoform 2) (F-actin cross-linking protein)	ACTN2	Homo sapiens (Human)	894
Q08043	ACTN3_HUMAN	reviewed	Alpha-actinin-3 (Alpha-actinin skeletal muscle isoform 3) (F-actin cross-linking protein)	ACTN3	Homo sapiens (Human)	901
O43707	ACTN4_HUMAN	reviewed	Alpha-actinin-4 (F-actin cross-linking protein) (Non-muscle alpha-actinin 4)	ACTN4	Homo sapiens (Human)	911
P68133	ACTS_HUMAN	reviewed	Actin, alpha skeletal muscle (Alpha-actin-1)	ACTA1 ACTA	Homo sapiens (Human)	377
Q8TDG2	ACTT1_HUMAN	reviewed	Actin-related protein T1 (ARP-T1)	ACTRT1 ARPT1 HSD27	Homo sapiens (Human)	376
Q8TDY3	ACTT2_HUMAN	reviewed	Actin-related protein T2 (ARP-T2) (Actin-related protein M2)	ACTRT2 ARPM2	Homo sapiens (Human)	377
Q9BYD9	ACTT3_HUMAN	reviewed	Actin-related protein T3 (ARP-T3) (Actin-related protein M1)	ACTRT3 ARPM1	Homo sapiens (Human)	372
P42025	ACTY_HUMAN	reviewed	Beta-centractin (Actin-related protein 1B) (ARP1B)	ACTR1B CTRN2	Homo sapiens (Human)	376
P61163	ACTZ_HUMAN	reviewed	Alpha-centractin (Centractin) (ARP1) (Actin-RPV) (Centrosome-associated actin homolog)	ACTR1A CTRN1	Homo sapiens (Human)	376
P36896	ACV1B_HUMAN	reviewed	Activin receptor type-1B (EC 2.7.11.30) (Activin receptor type IB) (ACTR-IB) (Activin receptor-like kinase 4) (ALK-4) (Serine/threonine-protein kinase receptor R2) (SKR2)	ACVR1B ACVRLK4 ALK4	Homo sapiens (Human)	505
Q8NER5	ACV1C_HUMAN	reviewed	Activin receptor type-1C (EC 2.7.11.30) (Activin receptor type IC) (ACTR-IC) (Activin receptor-like kinase 7) (ALK-7)	ACVR1C ALK7	Homo sapiens (Human)	493
P37023	ACVL1_HUMAN	reviewed	Serine/threonine-protein kinase receptor R3 (SKR3) (EC 2.7.11.30) (Activin receptor-like kinase 1) (ALK-1) (TGF-B superfamily receptor type I) (TSR-I)	ACVRL1 ACVRLK1 ALK1	Homo sapiens (Human)	503
Q04771	ACVR1_HUMAN	reviewed	Activin receptor type-1 (EC 2.7.11.30) (Activin receptor type I) (ACTR-I) (Activin receptor-like kinase 2) (ALK-2) (Serine/threonine-protein kinase receptor R1) (SKR1) (TGF-B superfamily receptor type I) (TSR-I)	ACVR1 ACVRLK2	Homo sapiens (Human)	509
Q03154	ACY1_HUMAN	reviewed	Aminoacylase-1 (ACY-1) (EC 3.5.1.14) (N-acyl-L-amino-acid amidohydrolase)	ACY1	Homo sapiens (Human)	408
P45381	ACY2_HUMAN	reviewed	Aspartoacylase (EC 3.5.1.15) (Aminoacylase-2) (ACY-2)	ASPA ACY2 ASP	Homo sapiens (Human)	313
Q96HD9	ACY3_HUMAN	reviewed	Aspartoacylase-2 (EC 3.5.1.-) (Acylase III) (Aminoacylase-3) (ACY-3) (Hepatitis C virus core-binding protein 1) (HCBP1) (HCV core-binding protein 1)	ACY3 ASPA2	Homo sapiens (Human)	319
P07311	ACYP1_HUMAN	reviewed	Acylphosphatase-1 (EC 3.6.1.7) (Acylphosphatase, erythrocyte isozyme) (Acylphosphatase, organ-common type isozyme) (Acylphosphate phosphohydrolase 1)	ACYP1 ACYPE	Homo sapiens (Human)	99
P14621	ACYP2_HUMAN	reviewed	Acylphosphatase-2 (EC 3.6.1.7) (Acylphosphatase, muscle type isozyme) (Acylphosphate phosphohydrolase 2)	ACYP2 ACYP	Homo sapiens (Human)	99
O14672	ADA10_HUMAN	reviewed	Disintegrin and metalloproteinase domain-containing protein 10 (ADAM 10) (EC 3.4.24.81) (CDw156) (Kuzbanian protein homolog) (Mammalian disintegrin-metalloprotease) (CD antigen CD156c)	ADAM10 KUZ MADM	Homo sapiens (Human)	748
O75078	ADA11_HUMAN	reviewed	Disintegrin and metalloproteinase domain-containing protein 11 (ADAM 11) (Metalloproteinase-like, disintegrin-like, and cysteine-rich protein) (MDC)	ADAM11 MDC	Homo sapiens (Human)	769
O43184	ADA12_HUMAN	reviewed	Disintegrin and metalloproteinase domain-containing protein 12 (ADAM 12) (EC 3.4.24.-) (Meltrin-alpha)	ADAM12 MLTN UNQ346/PRO545	Homo sapiens (Human)	909
Q13444	ADA15_HUMAN	reviewed	Disintegrin and metalloproteinase domain-containing protein 15 (ADAM 15) (EC 3.4.24.-) (Metalloprotease RGD disintegrin protein) (Metalloproteinase-like, disintegrin-like, and cysteine-rich protein 15) (MDC-15) (Metargidin)	ADAM15 MDC15	Homo sapiens (Human)	863
P78536	ADA17_HUMAN	reviewed	Disintegrin and metalloproteinase domain-containing protein 17 (ADAM 17) (EC 3.4.24.86) (Snake venom-like protease) (TNF-alpha convertase) (TNF-alpha-converting enzyme) (CD antigen CD156b)	ADAM17 CSVP TACE	Homo sapiens (Human)	824
Q9Y3Q7	ADA18_HUMAN	reviewed	Disintegrin and metalloproteinase domain-containing protein 18 (ADAM 18) (Transmembrane metalloproteinase-like, disintegrin-like, and cysteine-rich protein III) (tMDC III)	ADAM18 TMDC3 UNQ858/PRO1867	Homo sapiens (Human)	739
Q9H013	ADA19_HUMAN	reviewed	Disintegrin and metalloproteinase domain-containing protein 19 (ADAM 19) (EC 3.4.24.-) (Meltrin-beta) (Metalloprotease and disintegrin dendritic antigen marker) (MADDAM)	ADAM19 MLTNB FKSG34	Homo sapiens (Human)	955
P35348	ADA1A_HUMAN	reviewed	Alpha-1A adrenergic receptor (Alpha-1A adrenoreceptor) (Alpha-1A adrenoceptor) (Alpha-1C adrenergic receptor) (Alpha-adrenergic receptor 1c)	ADRA1A ADRA1C	Homo sapiens (Human)	466
P35368	ADA1B_HUMAN	reviewed	Alpha-1B adrenergic receptor (Alpha-1B adrenoreceptor) (Alpha-1B adrenoceptor)	ADRA1B	Homo sapiens (Human)	520
P25100	ADA1D_HUMAN	reviewed	Alpha-1D adrenergic receptor (Alpha-1A adrenergic receptor) (Alpha-1D adrenoreceptor) (Alpha-1D adrenoceptor) (Alpha-adrenergic receptor 1a)	ADRA1D ADRA1A	Homo sapiens (Human)	572
O43506	ADA20_HUMAN	reviewed	Disintegrin and metalloproteinase domain-containing protein 20 (ADAM 20) (EC 3.4.24.-)	ADAM20	Homo sapiens (Human)	726
Q9UKJ8	ADA21_HUMAN	reviewed	Disintegrin and metalloproteinase domain-containing protein 21 (ADAM 21) (EC 3.4.24.-)	ADAM21	Homo sapiens (Human)	722
Q9P0K1	ADA22_HUMAN	reviewed	Disintegrin and metalloproteinase domain-containing protein 22 (ADAM 22) (Metalloproteinase-disintegrin ADAM22-3) (Metalloproteinase-like, disintegrin-like, and cysteine-rich protein 2)	ADAM22 MDC2	Homo sapiens (Human)	906
O75077	ADA23_HUMAN	reviewed	Disintegrin and metalloproteinase domain-containing protein 23 (ADAM 23) (Metalloproteinase-like, disintegrin-like, and cysteine-rich protein 3) (MDC-3)	ADAM23 MDC3	Homo sapiens (Human)	832
Q9UKQ2	ADA28_HUMAN	reviewed	Disintegrin and metalloproteinase domain-containing protein 28 (ADAM 28) (EC 3.4.24.-) (Epididymal metalloproteinase-like, disintegrin-like, and cysteine-rich protein II) (eMDC II) (Metalloproteinase-like, disintegrin-like, and cysteine-rich protein L) (MDC-L)	ADAM28 ADAM23 MDCL	Homo sapiens (Human)	775
Q9UKF5	ADA29_HUMAN	reviewed	Disintegrin and metalloproteinase domain-containing protein 29 (ADAM 29) (Cancer/testis antigen 73) (CT73)	ADAM29	Homo sapiens (Human)	820
P08913	ADA2A_HUMAN	reviewed	Alpha-2A adrenergic receptor (Alpha-2 adrenergic receptor subtype C10) (Alpha-2A adrenoreceptor) (Alpha-2A adrenoceptor) (Alpha-2AAR)	ADRA2A ADRA2R ADRAR	Homo sapiens (Human)	450
P18089	ADA2B_HUMAN	reviewed	Alpha-2B adrenergic receptor (Alpha-2 adrenergic receptor subtype C2) (Alpha-2B adrenoreceptor) (Alpha-2B adrenoceptor) (Alpha-2BAR)	ADRA2B ADRA2L1 ADRA2RL1	Homo sapiens (Human)	450
P18825	ADA2C_HUMAN	reviewed	Alpha-2C adrenergic receptor (Alpha-2 adrenergic receptor subtype C4) (Alpha-2C adrenoreceptor) (Alpha-2C adrenoceptor) (Alpha-2CAR)	ADRA2C ADRA2L2 ADRA2RL2	Homo sapiens (Human)	462
Q9UKF2	ADA30_HUMAN	reviewed	Disintegrin and metalloproteinase domain-containing protein 30 (ADAM 30) (EC 3.4.24.-)	ADAM30 UNQ2509/PRO5997	Homo sapiens (Human)	790
Q8TC27	ADA32_HUMAN	reviewed	Disintegrin and metalloproteinase domain-containing protein 32 (ADAM 32)	ADAM32 UNQ5982/PRO21340	Homo sapiens (Human)	787
Q9BZ11	ADA33_HUMAN	reviewed	Disintegrin and metalloproteinase domain-containing protein 33 (ADAM 33) (EC 3.4.24.-)	ADAM33 C20orf153 UNQ873/PRO1891	Homo sapiens (Human)	813
Q96M93	ADAD1_HUMAN	reviewed	Adenosine deaminase domain-containing protein 1 (Testis nuclear RNA-binding protein)	ADAD1 TENR	Homo sapiens (Human)	576
Q8NCV1	ADAD2_HUMAN	reviewed	Adenosine deaminase domain-containing protein 2 (Testis nuclear RNA-binding protein-like)	ADAD2 TENRL	Homo sapiens (Human)	583
Q6DHV7	ADAL_HUMAN	reviewed	Adenosine deaminase-like protein (EC 3.5.4.-)	ADAL	Homo sapiens (Human)	355
Q99965	ADAM2_HUMAN	reviewed	Disintegrin and metalloproteinase domain-containing protein 2 (ADAM 2) (Cancer/testis antigen 15) (CT15) (Fertilin subunit beta) (PH-30) (PH30) (PH30-beta)	ADAM2 FTNB	Homo sapiens (Human)	735
Q6NVV9	ADAM5_HUMAN	reviewed	Putative disintegrin and metalloproteinase domain-containing protein 5 (Putative transmembrane metalloproteinase-like, disintegrin-like, and cysteine-rich protein II) (tMDC II)	ADAM5 ADAM5P TMDC2	Homo sapiens (Human)	412
Q9H2U9	ADAM7_HUMAN	reviewed	Disintegrin and metalloproteinase domain-containing protein 7 (ADAM 7) (Sperm maturation-related glycoprotein GP-83)	ADAM7 GP83	Homo sapiens (Human)	754
P78325	ADAM8_HUMAN	reviewed	Disintegrin and metalloproteinase domain-containing protein 8 (ADAM 8) (EC 3.4.24.-) (Cell surface antigen MS2) (CD antigen CD156a)	ADAM8 MS2	Homo sapiens (Human)	824
Q13443	ADAM9_HUMAN	reviewed	Disintegrin and metalloproteinase domain-containing protein 9 (ADAM 9) (EC 3.4.24.-) (Cellular disintegrin-related protein) (Meltrin-gamma) (Metalloprotease/disintegrin/cysteine-rich protein 9) (Myeloma cell metalloproteinase)	ADAM9 KIAA0021 MCMP MDC9 MLTNG	Homo sapiens (Human)	819
O75689	ADAP1_HUMAN	reviewed	Arf-GAP with dual PH domain-containing protein 1 (Centaurin-alpha-1) (Cnt-a1) (Putative MAPK-activating protein PM25)	ADAP1 CENTA1	Homo sapiens (Human)	374
Q9NPF8	ADAP2_HUMAN	reviewed	Arf-GAP with dual PH domain-containing protein 2 (Centaurin-alpha-2) (Cnt-a2)	ADAP2 CENTA2	Homo sapiens (Human)	381
A8MUL3	ADAS1_HUMAN	reviewed	Putative uncharacterized protein ADARB2-AS1 (ADARB2 antisense RNA 1) (ADARB2 antisense gene protein 1)	ADARB2-AS1 C10orf109 NCRNA00168	Homo sapiens (Human)	147
O00116	ADAS_HUMAN	reviewed	Alkyldihydroxyacetonephosphate synthase, peroxisomal (Alkyl-DHAP synthase) (EC 2.5.1.26) (Aging-associated gene 5 protein) (Alkylglycerone-phosphate synthase)	AGPS AAG5	Homo sapiens (Human)	658
Q9BUB4	ADAT1_HUMAN	reviewed	tRNA-specific adenosine deaminase 1 (hADAT1) (EC 3.5.4.34) (tRNA-specific adenosine-37 deaminase)	ADAT1	Homo sapiens (Human)	502
Q7Z6V5	ADAT2_HUMAN	reviewed	tRNA-specific adenosine deaminase 2 (EC 3.5.4.-) (Deaminase domain-containing protein 1) (tRNA-specific adenosine-34 deaminase subunit ADAT2)	ADAT2 DEADC1	Homo sapiens (Human)	191
Q96EY9	ADAT3_HUMAN	reviewed	Probable inactive tRNA-specific adenosine deaminase-like protein 3 (tRNA-specific adenosine-34 deaminase subunit ADAT3)	ADAT3	Homo sapiens (Human)	351
P00813	ADA_HUMAN	reviewed	Adenosine deaminase (EC 3.5.4.4) (Adenosine aminohydrolase)	ADA ADA1	Homo sapiens (Human)	363
Q86TW2	ADCK1_HUMAN	reviewed	Uncharacterized aarF domain-containing protein kinase 1 (EC 2.7.11.-)	ADCK1	Homo sapiens (Human)	530
Q7Z695	ADCK2_HUMAN	reviewed	Uncharacterized aarF domain-containing protein kinase 2 (EC 2.7.11.-)	ADCK2 AARF	Homo sapiens (Human)	626
Q8NI60	ADCK3_HUMAN	reviewed	Chaperone activity of bc1 complex-like, mitochondrial (Chaperone-ABC1-like) (EC 2.7.11.-) (aarF domain-containing protein kinase 3)	ADCK3 CABC1 PP265	Homo sapiens (Human)	647
Q96D53	ADCK4_HUMAN	reviewed	Uncharacterized aarF domain-containing protein kinase 4 (EC 2.7.11.-)	ADCK4	Homo sapiens (Human)	544
Q3MIX3	ADCK5_HUMAN	reviewed	Uncharacterized aarF domain-containing protein kinase 5 (EC 2.7.11.-)	ADCK5	Homo sapiens (Human)	580
Q6P093	ADCL2_HUMAN	reviewed	Arylacetamide deacetylase-like 2 (EC 3.1.1.-)	AADACL2	Homo sapiens (Human)	401
Q5VUY0	ADCL3_HUMAN	reviewed	Arylacetamide deacetylase-like 3 (EC 3.1.1.-)	AADACL3	Homo sapiens (Human)	350
Q5VUY2	ADCL4_HUMAN	reviewed	Arylacetamide deacetylase-like 4 (EC 3.1.1.-)	AADACL4	Homo sapiens (Human)	407
Q08828	ADCY1_HUMAN	reviewed	Adenylate cyclase type 1 (EC 4.6.1.1) (ATP pyrophosphate-lyase 1) (Adenylate cyclase type I) (Adenylyl cyclase 1) (Ca(2+)/calmodulin-activated adenylyl cyclase)	ADCY1	Homo sapiens (Human)	1119
Q08462	ADCY2_HUMAN	reviewed	Adenylate cyclase type 2 (EC 4.6.1.1) (ATP pyrophosphate-lyase 2) (Adenylate cyclase type II) (Adenylyl cyclase 2)	ADCY2 KIAA1060	Homo sapiens (Human)	1091
O60266	ADCY3_HUMAN	reviewed	Adenylate cyclase type 3 (EC 4.6.1.1) (ATP pyrophosphate-lyase 3) (Adenylate cyclase type III) (AC-III) (Adenylate cyclase, olfactive type) (Adenylyl cyclase 3) (AC3)	ADCY3 KIAA0511	Homo sapiens (Human)	1144
Q8NFM4	ADCY4_HUMAN	reviewed	Adenylate cyclase type 4 (EC 4.6.1.1) (ATP pyrophosphate-lyase 4) (Adenylate cyclase type IV) (Adenylyl cyclase 4)	ADCY4	Homo sapiens (Human)	1077
O95622	ADCY5_HUMAN	reviewed	Adenylate cyclase type 5 (EC 4.6.1.1) (ATP pyrophosphate-lyase 5) (Adenylate cyclase type V) (Adenylyl cyclase 5)	ADCY5	Homo sapiens (Human)	1261
O43306	ADCY6_HUMAN	reviewed	Adenylate cyclase type 6 (EC 4.6.1.1) (ATP pyrophosphate-lyase 6) (Adenylate cyclase type VI) (Adenylyl cyclase 6) (Ca(2+)-inhibitable adenylyl cyclase)	ADCY6 KIAA0422	Homo sapiens (Human)	1168
P51828	ADCY7_HUMAN	reviewed	Adenylate cyclase type 7 (EC 4.6.1.1) (ATP pyrophosphate-lyase 7) (Adenylate cyclase type VII) (Adenylyl cyclase 7)	ADCY7 KIAA0037	Homo sapiens (Human)	1080
P40145	ADCY8_HUMAN	reviewed	Adenylate cyclase type 8 (EC 4.6.1.1) (ATP pyrophosphate-lyase 8) (Adenylate cyclase type VIII) (Adenylyl cyclase 8) (AC8) (Ca(2+)/calmodulin-activated adenylyl cyclase)	ADCY8	Homo sapiens (Human)	1251
O60503	ADCY9_HUMAN	reviewed	Adenylate cyclase type 9 (EC 4.6.1.1) (ATP pyrophosphate-lyase 9) (Adenylate cyclase type IX) (Adenylyl cyclase 9)	ADCY9 KIAA0520	Homo sapiens (Human)	1353
Q96PN6	ADCYA_HUMAN	reviewed	Adenylate cyclase type 10 (EC 4.6.1.1) (AH-related protein) (Adenylate cyclase homolog) (Germ cell soluble adenylyl cyclase) (hsAC) (sAC) (Testicular soluble adenylyl cyclase)	ADCY10 SAC	Homo sapiens (Human)	1610
Q96A70	ADC_HUMAN	reviewed	Arginine decarboxylase (ADC) (ARGDC) (EC 4.1.1.19) (ODC-paralogue) (ODC-p) (Ornithine decarboxylase-like protein)	ADC KIAA1945 ODCP	Homo sapiens (Human)	460
P35611	ADDA_HUMAN	reviewed	Alpha-adducin (Erythrocyte adducin subunit alpha)	ADD1 ADDA	Homo sapiens (Human)	737
P35612	ADDB_HUMAN	reviewed	Beta-adducin (Erythrocyte adducin subunit beta)	ADD2 ADDB	Homo sapiens (Human)	726
Q9UEY8	ADDG_HUMAN	reviewed	Gamma-adducin (Adducin-like protein 70)	ADD3 ADDL	Homo sapiens (Human)	706
O15204	ADEC1_HUMAN	reviewed	ADAM DEC1 (EC 3.4.24.-) (A disintegrin and metalloproteinase domain-like protein decysin-1) (ADAM-like protein decysin-1)	ADAMDEC1	Homo sapiens (Human)	470
Q8N7X0	ADGB_HUMAN	reviewed	Androglobin (Calpain-7-like protein)	ADGB C6orf103 CAPN7L	Homo sapiens (Human)	1667
P07327	ADH1A_HUMAN	reviewed	Alcohol dehydrogenase 1A (EC 1.1.1.1) (Alcohol dehydrogenase subunit alpha)	ADH1A ADH1	Homo sapiens (Human)	375
P00325	ADH1B_HUMAN	reviewed	Alcohol dehydrogenase 1B (EC 1.1.1.1) (Alcohol dehydrogenase subunit beta)	ADH1B ADH2	Homo sapiens (Human)	375
P00326	ADH1G_HUMAN	reviewed	Alcohol dehydrogenase 1C (EC 1.1.1.1) (Alcohol dehydrogenase subunit gamma)	ADH1C ADH3	Homo sapiens (Human)	375
P08319	ADH4_HUMAN	reviewed	Alcohol dehydrogenase 4 (EC 1.1.1.1) (Alcohol dehydrogenase class II pi chain)	ADH4	Homo sapiens (Human)	380
P28332	ADH6_HUMAN	reviewed	Alcohol dehydrogenase 6 (EC 1.1.1.1)	ADH6	Homo sapiens (Human)	368
P40394	ADH7_HUMAN	reviewed	Alcohol dehydrogenase class 4 mu/sigma chain (EC 1.1.1.1) (Alcohol dehydrogenase class IV mu/sigma chain) (Gastric alcohol dehydrogenase) (Retinol dehydrogenase)	ADH7	Homo sapiens (Human)	386
P11766	ADHX_HUMAN	reviewed	Alcohol dehydrogenase class-3 (EC 1.1.1.1) (Alcohol dehydrogenase 5) (Alcohol dehydrogenase class chi chain) (Alcohol dehydrogenase class-III) (Glutathione-dependent formaldehyde dehydrogenase) (FALDH) (FDH) (GSH-FDH) (EC 1.1.1.-) (S-(hydroxymethyl)glutathione dehydrogenase) (EC 1.1.1.284)	ADH5 ADHX FDH	Homo sapiens (Human)	374
Q0VDE8	ADIG_HUMAN	reviewed	Adipogenin	ADIG	Homo sapiens (Human)	80
Q15848	ADIPO_HUMAN	reviewed	Adiponectin (30 kDa adipocyte complement-related protein) (Adipocyte complement-related 30 kDa protein) (ACRP30) (Adipocyte, C1q and collagen domain-containing protein) (Adipose most abundant gene transcript 1 protein) (apM-1) (Gelatin-binding protein)	ADIPOQ ACDC ACRP30 APM1 GBP28	Homo sapiens (Human)	244
Q9Y2D8	ADIP_HUMAN	reviewed	Afadin- and alpha-actinin-binding protein (ADIP) (Afadin DIL domain-interacting protein) (SSX2-interacting protein)	SSX2IP KIAA0923	Homo sapiens (Human)	614
Q15847	ADIRF_HUMAN	reviewed	Adipogenesis regulatory factor (Adipogenesis factor rich in obesity) (Adipose most abundant gene transcript 2 protein) (Adipose-specific protein 2) (apM-2)	ADIRF AFRO APM2 C10orf116	Homo sapiens (Human)	76
P55263	ADK_HUMAN	reviewed	Adenosine kinase (AK) (EC 2.7.1.20) (Adenosine 5'-phosphotransferase)	ADK	Homo sapiens (Human)	362
Q7Z4H4	ADM2_HUMAN	reviewed	ADM2 (Intermedin) [Cleaved into: Adrenomedullin-2 (AM2) (Intermedin-long) (IMDL); Intermedin-short (IMDS)]	ADM2 AM2	Homo sapiens (Human)	148
C9JUS6	ADM5_HUMAN	reviewed	Putative adrenomedullin-5-like protein	ADM5 C19orf76	Homo sapiens (Human)	153
P35318	ADML_HUMAN	reviewed	ADM [Cleaved into: Adrenomedullin (AM); Proadrenomedullin N-20 terminal peptide (ProAM N-terminal 20 peptide) (PAMP) (ProAM-N20)]	ADM AM	Homo sapiens (Human)	185
Q6IQ32	ADNP2_HUMAN	reviewed	ADNP homeobox protein 2 (Zinc finger protein 508)	ADNP2 KIAA0863 ZNF508	Homo sapiens (Human)	1131
Q9H2P0	ADNP_HUMAN	reviewed	Activity-dependent neuroprotector homeobox protein (Activity-dependent neuroprotective protein)	ADNP ADNP1 KIAA0784	Homo sapiens (Human)	1102
Q06278	ADO_HUMAN	reviewed	Aldehyde oxidase (EC 1.2.3.1)	AOX1 AO	Homo sapiens (Human)	1338
Q9BRR6	ADPGK_HUMAN	reviewed	ADP-dependent glucokinase (ADP-GK) (ADPGK) (EC 2.7.1.147) (RbBP-35)	ADPGK PSEC0260	Homo sapiens (Human)	497
Q9NRN7	ADPPT_HUMAN	reviewed	L-aminoadipate-semialdehyde dehydrogenase-phosphopantetheinyl transferase (EC 2.7.8.-) (4'-phosphopantetheinyl transferase) (Alpha-aminoadipic semialdehyde dehydrogenase-phosphopantetheinyl transferase) (AASD-PPT) (LYS5 ortholog)	AASDHPPT CGI-80 HAH-P HSPC223 x0005	Homo sapiens (Human)	309
P54922	ADPRH_HUMAN	reviewed	[Protein ADP-ribosylarginine] hydrolase (ADP-ribosylarginine hydrolase) (EC 3.2.2.19) (ADP-ribose-L-arginine cleaving enzyme)	ADPRH ARH1	Homo sapiens (Human)	357
Q3LIE5	ADPRM_HUMAN	reviewed	Manganese-dependent ADP-ribose/CDP-alcohol diphosphatase (EC 3.6.1.13) (EC 3.6.1.16) (EC 3.6.1.53) (ADPRibase-Mn) (CDP-choline phosphohydrolase)	ADPRM C17orf48 MDS006 Nbla03831	Homo sapiens (Human)	342
Q96A54	ADR1_HUMAN	reviewed	Adiponectin receptor protein 1 (Progestin and adipoQ receptor family member I)	ADIPOR1 PAQR1 TESBP1A CGI-45	Homo sapiens (Human)	375
Q86V24	ADR2_HUMAN	reviewed	Adiponectin receptor protein 2 (Progestin and adipoQ receptor family member II)	ADIPOR2 PAQR2	Homo sapiens (Human)	386
P08588	ADRB1_HUMAN	reviewed	Beta-1 adrenergic receptor (Beta-1 adrenoreceptor) (Beta-1 adrenoceptor)	ADRB1 ADRB1R B1AR	Homo sapiens (Human)	477
P07550	ADRB2_HUMAN	reviewed	Beta-2 adrenergic receptor (Beta-2 adrenoreceptor) (Beta-2 adrenoceptor)	ADRB2 ADRB2R B2AR	Homo sapiens (Human)	413
P13945	ADRB3_HUMAN	reviewed	Beta-3 adrenergic receptor (Beta-3 adrenoreceptor) (Beta-3 adrenoceptor)	ADRB3 ADRB3R B3AR	Homo sapiens (Human)	408
Q16186	ADRM1_HUMAN	reviewed	Proteasomal ubiquitin receptor ADRM1 (110 kDa cell membrane glycoprotein) (Gp110) (Adhesion-regulating molecule 1) (ARM-1) (Proteasome regulatory particle non-ATPase 13) (hRpn13) (Rpn13 homolog)	ADRM1 GP110	Homo sapiens (Human)	407
P22570	ADRO_HUMAN	reviewed	NADPH:adrenodoxin oxidoreductase, mitochondrial (AR) (Adrenodoxin reductase) (EC 1.18.1.6) (Ferredoxin--NADP(+) reductase) (Ferredoxin reductase)	FDXR ADXR	Homo sapiens (Human)	491
Q9Y6U3	ADSV_HUMAN	reviewed	Adseverin (Scinderin)	SCIN KIAA1905	Homo sapiens (Human)	715
P12235	ADT1_HUMAN	reviewed	ADP/ATP translocase 1 (ADP,ATP carrier protein 1) (ADP,ATP carrier protein, heart/skeletal muscle isoform T1) (Adenine nucleotide translocator 1) (ANT 1) (Solute carrier family 25 member 4)	SLC25A4 ANT1	Homo sapiens (Human)	298
P05141	ADT2_HUMAN	reviewed	ADP/ATP translocase 2 (ADP,ATP carrier protein 2) (ADP,ATP carrier protein, fibroblast isoform) (Adenine nucleotide translocator 2) (ANT 2) (Solute carrier family 25 member 5)	SLC25A5 ANT2	Homo sapiens (Human)	298
P12236	ADT3_HUMAN	reviewed	ADP/ATP translocase 3 (ADP,ATP carrier protein 3) (ADP,ATP carrier protein, isoform T2) (ANT 2) (Adenine nucleotide translocator 3) (ANT 3) (Solute carrier family 25 member 6)	SLC25A6 ANT3 CDABP0051	Homo sapiens (Human)	298
Q9H0C2	ADT4_HUMAN	reviewed	ADP/ATP translocase 4 (ADP,ATP carrier protein 4) (Adenine nucleotide translocator 4) (ANT 4) (Solute carrier family 25 member 31) (Sperm flagellar energy carrier protein)	SLC25A31 AAC4 ANT4 SFEC	Homo sapiens (Human)	315
Q96IZ2	ADTRP_HUMAN	reviewed	Androgen-dependent TFPI-regulating protein	ADTRP C6orf105	Homo sapiens (Human)	230
Q6P4F2	ADXL_HUMAN	reviewed	Adrenodoxin-like protein, mitochondrial (Ferredoxin-1-like protein)	FDX1L	Homo sapiens (Human)	183
P10109	ADX_HUMAN	reviewed	Adrenodoxin, mitochondrial (Adrenal ferredoxin) (Ferredoxin-1) (Hepatoredoxin)	FDX1 ADX	Homo sapiens (Human)	184
Q8IUX7	AEBP1_HUMAN	reviewed	Adipocyte enhancer-binding protein 1 (AE-binding protein 1) (Aortic carboxypeptidase-like protein)	AEBP1 ACLP	Homo sapiens (Human)	1158
Q6ZN18	AEBP2_HUMAN	reviewed	Zinc finger protein AEBP2 (Adipocyte enhancer-binding protein 2) (AE-binding protein 2)	AEBP2	Homo sapiens (Human)	517
Q96SZ5	AEDO_HUMAN	reviewed	2-aminoethanethiol dioxygenase (EC 1.13.11.19) (Cysteamine dioxygenase)	ADO C10orf22	Homo sapiens (Human)	270
Q6UXC1	AEGP_HUMAN	reviewed	Apical endosomal glycoprotein (MAM domain-containing protein 4)	MAMDC4 AEGP UNQ3001/PRO9742	Homo sapiens (Human)	1216
Q8WTP8	AEN_HUMAN	reviewed	Apoptosis-enhancing nuclease (EC 3.1.-.-) (Interferon-stimulated 20 kDa exonuclease-like 1)	AEN ISG20L1 SBBI58	Homo sapiens (Human)	325
Q08117	AES_HUMAN	reviewed	Amino-terminal enhancer of split (Amino enhancer of split) (Gp130-associated protein GAM) (Protein ESP1) (Protein GRG)	AES GRG	Homo sapiens (Human)	197
P55197	AF10_HUMAN	reviewed	Protein AF-10 (ALL1-fused gene from chromosome 10 protein)	MLLT10 AF10	Homo sapiens (Human)	1027
P55198	AF17_HUMAN	reviewed	Protein AF-17 (ALL1-fused gene from chromosome 17 protein)	MLLT6 AF17	Homo sapiens (Human)	1093
Q8TED9	AF1L1_HUMAN	reviewed	Actin filament-associated protein 1-like 1 (AFAP1-like protein 1)	AFAP1L1	Homo sapiens (Human)	768
Q8N4X5	AF1L2_HUMAN	reviewed	Actin filament-associated protein 1-like 2 (AFAP1-like protein 2)	AFAP1L2 KIAA1914 XB130	Homo sapiens (Human)	818
Q13015	AF1Q_HUMAN	reviewed	Protein AF1q	MLLT11 AF1Q	Homo sapiens (Human)	90
P42568	AF9_HUMAN	reviewed	Protein AF-9 (ALL1-fused gene from chromosome 9 protein) (Myeloid/lymphoid or mixed-lineage leukemia translocated to chromosome 3 protein) (YEATS domain-containing protein 3)	MLLT3 AF9 YEATS3	Homo sapiens (Human)	568
P55196	AFAD_HUMAN	reviewed	Afadin (ALL1-fused gene from chromosome 6 protein) (Protein AF-6)	MLLT4 AF6	Homo sapiens (Human)	1824
P43652	AFAM_HUMAN	reviewed	Afamin (Alpha-albumin) (Alpha-Alb)	AFM ALB2 ALBA	Homo sapiens (Human)	599
Q8N556	AFAP1_HUMAN	reviewed	Actin filament-associated protein 1 (110 kDa actin filament-associated protein) (AFAP-110)	AFAP1 AFAP	Homo sapiens (Human)	730
P51825	AFF1_HUMAN	reviewed	AF4/FMR2 family member 1 (ALL1-fused gene from chromosome 4 protein) (Protein AF-4) (Protein FEL) (Proto-oncogene AF4)	AFF1 AF4 FEL MLLT2 PBM1	Homo sapiens (Human)	1210
P51816	AFF2_HUMAN	reviewed	AF4/FMR2 family member 2 (Fragile X E mental retardation syndrome protein) (Fragile X mental retardation 2 protein) (FMR2P) (Protein FMR-2) (Protein Ox19)	AFF2 FMR2 OX19	Homo sapiens (Human)	1311
P51826	AFF3_HUMAN	reviewed	AF4/FMR2 family member 3 (Lymphoid nuclear protein related to AF4) (Protein LAF-4)	AFF3 LAF4	Homo sapiens (Human)	1226
Q9UHB7	AFF4_HUMAN	reviewed	AF4/FMR2 family member 4 (ALL1-fused gene from chromosome 5q31 protein) (Protein AF-5q31) (Major CDK9 elongation factor-associated protein)	AFF4 AF5Q31 MCEF HSPC092	Homo sapiens (Human)	1163
Q9Y4W6	AFG32_HUMAN	reviewed	AFG3-like protein 2 (EC 3.4.24.-) (Paraplegin-like protein)	AFG3L2	Homo sapiens (Human)	797
Q6ULP2	AFTIN_HUMAN	reviewed	Aftiphilin	AFTPH AFTH	Homo sapiens (Human)	937
Q5BKT4	AG10A_HUMAN	reviewed	Dol-P-Glc:Glc(2)Man(9)GlcNAc(2)-PP-Dol alpha-1,2-glucosyltransferase (EC 2.4.1.256) (Alpha-1,2-glucosyltransferase ALG10-A) (Alpha-2-glucosyltransferase ALG10-A) (Asparagine-linked glycosylation protein 10 homolog A)	ALG10 ALG10A	Homo sapiens (Human)	473
Q5I7T1	AG10B_HUMAN	reviewed	Putative Dol-P-Glc:Glc(2)Man(9)GlcNAc(2)-PP-Dol alpha-1,2-glucosyltransferase (EC 2.4.1.256) (Alpha-1,2-glucosyltransferase ALG10-A) (Alpha-2-glucosyltransferase ALG10-B) (Asparagine-linked glycosylation protein 10 homolog B) (Potassium channel regulator 1)	ALG10B KCR1	Homo sapiens (Human)	473
C9J202	AG1L2_HUMAN	reviewed	Putative glycosyltransferase ALG1L2 (EC 2.4.1.-)	ALG1L2	Homo sapiens (Human)	215
Q5T2P9	AGA10_HUMAN	reviewed	Arf-GAP with GTPase, ANK repeat and PH domain-containing protein 10 (AGAP-10) (Centaurin-gamma-like family member 7)	AGAP10 CTGLF7	Homo sapiens (Human)	658
Q8TF27	AGA11_HUMAN	reviewed	Arf-GAP with GTPase, ANK repeat and PH domain-containing protein 11 (AGAP-11) (Centaurin-gamma-like protein KIAA1975)	AGAP11 KIAA1975	Homo sapiens (Human)	550
P06280	AGAL_HUMAN	reviewed	Alpha-galactosidase A (EC 3.2.1.22) (Alpha-D-galactosidase A) (Alpha-D-galactoside galactohydrolase) (Melibiase) (Agalsidase)	GLA	Homo sapiens (Human)	429
Q9UPQ3	AGAP1_HUMAN	reviewed	Arf-GAP with GTPase, ANK repeat and PH domain-containing protein 1 (AGAP-1) (Centaurin-gamma-2) (Cnt-g2) (GTP-binding and GTPase-activating protein 1) (GGAP1)	AGAP1 CENTG2 KIAA1099	Homo sapiens (Human)	857
Q99490	AGAP2_HUMAN	reviewed	Arf-GAP with GTPase, ANK repeat and PH domain-containing protein 2 (AGAP-2) (Centaurin-gamma-1) (Cnt-g1) (GTP-binding and GTPase-activating protein 2) (GGAP2) (Phosphatidylinositol 3-kinase enhancer) (PIKE)	AGAP2 CENTG1 KIAA0167	Homo sapiens (Human)	1192
Q96P47	AGAP3_HUMAN	reviewed	Arf-GAP with GTPase, ANK repeat and PH domain-containing protein 3 (AGAP-3) (CRAM-associated GTPase) (CRAG) (Centaurin-gamma-3) (Cnt-g3) (MR1-interacting protein) (MRIP-1)	AGAP3 CENTG3	Homo sapiens (Human)	875
Q96P64	AGAP4_HUMAN	reviewed	Arf-GAP with GTPase, ANK repeat and PH domain-containing protein 4 (AGAP-4) (Centaurin-gamma-like family member 1)	AGAP4 CTGLF1 MRIP2	Homo sapiens (Human)	663
A6NIR3	AGAP5_HUMAN	reviewed	Arf-GAP with GTPase, ANK repeat and PH domain-containing protein 5 (AGAP-5) (Centaurin-gamma-like family member 2)	AGAP5 CTGLF2	Homo sapiens (Human)	686
Q5VW22	AGAP6_HUMAN	reviewed	Arf-GAP with GTPase, ANK repeat and PH domain-containing protein 6 (AGAP-6) (Centaurin-gamma-like family member 3)	AGAP6 CTGLF3	Homo sapiens (Human)	663
Q5VUJ5	AGAP7_HUMAN	reviewed	Arf-GAP with GTPase, ANK repeat and PH domain-containing protein 7 (AGAP-7) (Centaurin-gamma-like family member 4)	AGAP7 CTGLF4	Homo sapiens (Human)	663
Q5SRD3	AGAP8_HUMAN	reviewed	Arf-GAP with GTPase, ANK repeat and PH domain-containing protein 8 (AGAP-8) (Centaurin-gamma-like family member 5)	AGAP8 CTGLF5	Homo sapiens (Human)	663
Q5VTM2	AGAP9_HUMAN	reviewed	Arf-GAP with GTPase, ANK repeat and PH domain-containing protein 9 (AGAP-9) (Centaurin-gamma-like family member 6)	AGAP9 CTGLF6	Homo sapiens (Human)	703
P52594	AGFG1_HUMAN	reviewed	Arf-GAP domain and FG repeat-containing protein 1 (HIV-1 Rev-binding protein) (Nucleoporin-like protein RIP) (Rev-interacting protein) (Rev/Rex activation domain-binding protein)	AGFG1 HRB RAB RIP	Homo sapiens (Human)	562
O95081	AGFG2_HUMAN	reviewed	Arf-GAP domain and FG repeat-containing protein 2 (HIV-1 Rev-binding protein-like protein) (Rev/Rex activation domain-binding protein related) (RAB-R)	AGFG2 HRBL RABR	Homo sapiens (Human)	481
Q8N302	AGGF1_HUMAN	reviewed	Angiogenic factor with G patch and FHA domains 1 (Angiogenic factor VG5Q) (hVG5Q) (G patch domain-containing protein 7) (Vasculogenesis gene on 5q protein)	AGGF1 GPATC7 GPATCH7 VG5Q	Homo sapiens (Human)	714
Q9H0P7	AGIT1_HUMAN	reviewed	Putative uncharacterized protein encoded by AGPAT4-IT1 (AGPAT4 intronic transcript 1)	AGPAT4-IT1 C6orf59 NCRNA00241	Homo sapiens (Human)	198
Q53H12	AGK_HUMAN	reviewed	Acylglycerol kinase, mitochondrial (hAGK) (EC 2.7.1.107) (EC 2.7.1.94) (Multiple substrate lipid kinase) (HsMuLK) (MuLK) (Multi-substrate lipid kinase)	AGK MULK	Homo sapiens (Human)	422
O95394	AGM1_HUMAN	reviewed	Phosphoacetylglucosamine mutase (PAGM) (EC 5.4.2.3) (Acetylglucosamine phosphomutase) (N-acetylglucosamine-phosphate mutase) (Phosphoglucomutase-3) (PGM 3)	PGM3 AGM1	Homo sapiens (Human)	542
Q9UL18	AGO1_HUMAN	reviewed	Protein argonaute-1 (Argonaute1) (hAgo1) (Eukaryotic translation initiation factor 2C 1) (eIF-2C 1) (eIF2C 1) (Putative RNA-binding protein Q99)	EIF2C1 AGO1	Homo sapiens (Human)	857
Q9UKV8	AGO2_HUMAN	reviewed	Protein argonaute-2 (Argonaute2) (hAgo2) (EC 3.1.26.n2) (Eukaryotic translation initiation factor 2C 2) (eIF-2C 2) (eIF2C 2) (PAZ Piwi domain protein) (PPD) (Protein slicer)	EIF2C2 AGO2	Homo sapiens (Human)	859
Q9H9G7	AGO3_HUMAN	reviewed	Protein argonaute-3 (Argonaute3) (hAgo3) (Eukaryotic translation initiation factor 2C 3) (eIF-2C 3) (eIF2C 3)	EIF2C3 AGO3	Homo sapiens (Human)	860
Q9HCK5	AGO4_HUMAN	reviewed	Protein argonaute-4 (Argonaute4) (hAgo4) (Eukaryotic translation initiation factor 2C 4) (eIF-2C 4) (eIF2C 4)	EIF2C4 AGO4 KIAA1567	Homo sapiens (Human)	861
A2RU49	AGPD1_HUMAN	reviewed	Hydroxylysine kinase (5-hydroxy-L-lysine kinase) (EC 2.7.1.81) (Aminoglycoside phosphotransferase domain-containing protein 1)	AGPHD1	Homo sapiens (Human)	373
O95994	AGR2_HUMAN	reviewed	Anterior gradient protein 2 homolog (AG-2) (hAG-2) (HPC8) (Secreted cement gland protein XAG-2 homolog)	AGR2 AG2 UNQ515/PRO1030	Homo sapiens (Human)	175
Q8TD06	AGR3_HUMAN	reviewed	Anterior gradient protein 3 homolog (AG-3) (AG3) (hAG-3) (Breast cancer membrane protein 11)	AGR3 BCMP11 UNQ642/PRO1272	Homo sapiens (Human)	166
O00468	AGRIN_HUMAN	reviewed	Agrin [Cleaved into: Agrin N-terminal 110 kDa subunit; Agrin C-terminal 110 kDa subunit; Agrin C-terminal 90 kDa fragment (C90); Agrin C-terminal 22 kDa fragment (C22)]	AGRN AGRIN	Homo sapiens (Human)	2067
O00253	AGRP_HUMAN	reviewed	Agouti-related protein	AGRP AGRT ART	Homo sapiens (Human)	132
Q9BXM8	AGSK1_HUMAN	reviewed	Putative colon cancer-associated antigen SK1 (AgSK1)		Homo sapiens (Human)	129
Q9BYV1	AGT2_HUMAN	reviewed	Alanine--glyoxylate aminotransferase 2, mitochondrial (AGT 2) (EC 2.6.1.44) ((R)-3-amino-2-methylpropionate--pyruvate transaminase) (EC 2.6.1.40) (Beta-ALAAT II) (Beta-alanine-pyruvate aminotransferase) (D-AIBAT)	AGXT2 AGT2	Homo sapiens (Human)	514
P30556	AGTR1_HUMAN	reviewed	Type-1 angiotensin II receptor (AT1AR) (AT1BR) (Angiotensin II type-1 receptor) (AT1)	AGTR1 AGTR1A AGTR1B AT2R1 AT2R1B	Homo sapiens (Human)	359
P50052	AGTR2_HUMAN	reviewed	Type-2 angiotensin II receptor (Angiotensin II type-2 receptor) (AT2)	AGTR2	Homo sapiens (Human)	363
Q5TGY3	AHDC1_HUMAN	reviewed	AT-hook DNA-binding motif-containing protein 1	AHDC1	Homo sapiens (Human)	1603
Q8N157	AHI1_HUMAN	reviewed	Jouberin (Abelson helper integration site 1 protein homolog) (AHI-1)	AHI1	Homo sapiens (Human)	1196
Q8IVF2	AHNK2_HUMAN	reviewed	Protein AHNAK2	AHNAK2 C14orf78 KIAA2019	Homo sapiens (Human)	5795
Q09666	AHNK_HUMAN	reviewed	Neuroblast differentiation-associated protein AHNAK (Desmoyokin)	AHNAK PM227	Homo sapiens (Human)	5890
A9YTQ3	AHRR_HUMAN	reviewed	Aryl hydrocarbon receptor repressor (AhR repressor) (AhRR) (Class E basic helix-loop-helix protein 77) (bHLHe77)	AHRR BHLHE77 KIAA1234	Homo sapiens (Human)	701
P35869	AHR_HUMAN	reviewed	Aryl hydrocarbon receptor (Ah receptor) (AhR) (Class E basic helix-loop-helix protein 76) (bHLHe76)	AHR BHLHE76	Homo sapiens (Human)	848
O95433	AHSA1_HUMAN	reviewed	Activator of 90 kDa heat shock protein ATPase homolog 1 (AHA1) (p38)	AHSA1 C14orf3 HSPC322	Homo sapiens (Human)	338
Q719I0	AHSA2_HUMAN	reviewed	Activator of 90 kDa heat shock protein ATPase homolog 2	AHSA2	Homo sapiens (Human)	299
Q9NZD4	AHSP_HUMAN	reviewed	Alpha-hemoglobin-stabilizing protein (Erythroid differentiation-related factor) (Erythroid-associated factor)	AHSP EDRF ERAF	Homo sapiens (Human)	102
Q9GZX7	AICDA_HUMAN	reviewed	Activation-induced cytidine deaminase (EC 3.5.4.5) (Cytidine aminohydrolase)	AICDA AID	Homo sapiens (Human)	198
Q96BJ3	AIDA_HUMAN	reviewed	Axin interactor, dorsalization-associated protein (Axin interaction partner and dorsalization antagonist)	AIDA C1orf80	Homo sapiens (Human)	306
Q9BQI0	AIF1L_HUMAN	reviewed	Allograft inflammatory factor 1-like (Ionized calcium-binding adapter molecule 2)	AIF1L C9orf58 IBA2 UNQ672/PRO1306	Homo sapiens (Human)	150
P55008	AIF1_HUMAN	reviewed	Allograft inflammatory factor 1 (AIF-1) (Ionized calcium-binding adapter molecule 1) (Protein G1)	AIF1 G1 IBA1	Homo sapiens (Human)	147
O95831	AIFM1_HUMAN	reviewed	Apoptosis-inducing factor 1, mitochondrial (EC 1.-.-.-) (Programmed cell death protein 8)	AIFM1 AIF PDCD8	Homo sapiens (Human)	613
Q9BRQ8	AIFM2_HUMAN	reviewed	Apoptosis-inducing factor 2 (EC 1.-.-.-) (Apoptosis-inducing factor homologous mitochondrion-associated inducer of death) (Apoptosis-inducing factor-like mitochondrion-associated inducer of death) (p53-responsive gene 3 protein)	AIFM2 AMID PRG3	Homo sapiens (Human)	373
Q96NN9	AIFM3_HUMAN	reviewed	Apoptosis-inducing factor 3 (EC 1.-.-.-) (Apoptosis-inducing factor-like protein)	AIFM3 AIFL	Homo sapiens (Human)	605
Q9NVV5	AIG1_HUMAN	reviewed	Androgen-induced gene 1 protein (AIG-1)	AIG1 CGI-103	Homo sapiens (Human)	245
Q8N1P7	AIM1L_HUMAN	reviewed	Absent in melanoma 1-like protein (Beta/gamma crystallin domain-containing protein 2)	AIM1L CRYBG2	Homo sapiens (Human)	616
Q9Y4K1	AIM1_HUMAN	reviewed	Absent in melanoma 1 protein (Beta/gamma crystallin domain-containing protein 1)	AIM1 CRYBG1	Homo sapiens (Human)	1723
O14862	AIM2_HUMAN	reviewed	Interferon-inducible protein AIM2 (Absent in melanoma 2)	AIM2	Homo sapiens (Human)	343
Q12904	AIMP1_HUMAN	reviewed	Aminoacyl tRNA synthase complex-interacting multifunctional protein 1 (Multisynthase complex auxiliary component p43) [Cleaved into: Endothelial monocyte-activating polypeptide 2 (EMAP-2) (Endothelial monocyte-activating polypeptide II) (EMAP-II) (Small inducible cytokine subfamily E member 1)]	AIMP1 EMAP2 SCYE1	Homo sapiens (Human)	312
Q13155	AIMP2_HUMAN	reviewed	Aminoacyl tRNA synthase complex-interacting multifunctional protein 2 (Multisynthase complex auxiliary component p38) (Protein JTV-1)	AIMP2 JTV1 PRO0992	Homo sapiens (Human)	320
Q16352	AINX_HUMAN	reviewed	Alpha-internexin (Alpha-Inx) (66 kDa neurofilament protein) (NF-66) (Neurofilament-66) (Neurofilament 5)	INA NEF5	Homo sapiens (Human)	499
Q9NZN9	AIPL1_HUMAN	reviewed	Aryl-hydrocarbon-interacting protein-like 1	AIPL1 AIPL2	Homo sapiens (Human)	384
O00170	AIP_HUMAN	reviewed	AH receptor-interacting protein (AIP) (Aryl-hydrocarbon receptor-interacting protein) (HBV X-associated protein 2) (XAP-2) (Immunophilin homolog ARA9)	AIP XAP2	Homo sapiens (Human)	330
O43918	AIRE_HUMAN	reviewed	Autoimmune regulator (Autoimmune polyendocrinopathy candidiasis ectodermal dystrophy protein) (APECED protein)	AIRE APECED	Homo sapiens (Human)	545
Q9UKB5	AJAP1_HUMAN	reviewed	Adherens junction-associated protein 1 (Membrane protein shrew-1)	AJAP1 MOT8 SHREW1	Homo sapiens (Human)	411
Q96IF1	AJUBA_HUMAN	reviewed	LIM domain-containing protein ajuba	AJUBA JUB	Homo sapiens (Human)	538
Q02040	AK17A_HUMAN	reviewed	A-kinase anchor protein 17A (AKAP-17A) (721P) (B-lymphocyte antigen) (Protein XE7) (Protein kinase A-anchoring protein 17A) (PRKA17A) (Splicing factor, arginine/serine-rich 17A)	AKAP17A CXYorf3 DXYS155E SFRS17A XE7	Homo sapiens (Human)	695
P14550	AK1A1_HUMAN	reviewed	Alcohol dehydrogenase [NADP(+)] (EC 1.1.1.2) (Aldehyde reductase) (Aldo-keto reductase family 1 member A1)	AKR1A1 ALDR1 ALR	Homo sapiens (Human)	325
O60218	AK1BA_HUMAN	reviewed	Aldo-keto reductase family 1 member B10 (EC 1.1.1.-) (ARL-1) (Aldose reductase-like) (Aldose reductase-related protein) (ARP) (hARP) (Small intestine reductase) (SI reductase)	AKR1B10 AKR1B11	Homo sapiens (Human)	316
C9JRZ8	AK1BF_HUMAN	reviewed	Aldo-keto reductase family 1 member B15 (EC 1.1.1.-)	AKR1B15	Homo sapiens (Human)	344
Q04828	AK1C1_HUMAN	reviewed	Aldo-keto reductase family 1 member C1 (EC 1.1.1.-) (20-alpha-hydroxysteroid dehydrogenase) (20-alpha-HSD) (EC 1.1.1.149) (Chlordecone reductase homolog HAKRC) (Dihydrodiol dehydrogenase 1/2) (DD1/DD2) (High-affinity hepatic bile acid-binding protein) (HBAB) (Indanol dehydrogenase) (EC 1.1.1.112) (Trans-1,2-dihydrobenzene-1,2-diol dehydrogenase) (EC 1.3.1.20)	AKR1C1 DDH DDH1	Homo sapiens (Human)	323
P52895	AK1C2_HUMAN	reviewed	Aldo-keto reductase family 1 member C2 (EC 1.-.-.-) (3-alpha-HSD3) (Chlordecone reductase homolog HAKRD) (Dihydrodiol dehydrogenase 2) (DD-2) (DD2) (Dihydrodiol dehydrogenase/bile acid-binding protein) (DD/BABP) (Trans-1,2-dihydrobenzene-1,2-diol dehydrogenase) (EC 1.3.1.20) (Type III 3-alpha-hydroxysteroid dehydrogenase) (EC 1.1.1.213)	AKR1C2 DDH2	Homo sapiens (Human)	323
P42330	AK1C3_HUMAN	reviewed	Aldo-keto reductase family 1 member C3 (EC 1.-.-.-) (17-beta-hydroxysteroid dehydrogenase type 5) (17-beta-HSD 5) (3-alpha-HSD type II, brain) (3-alpha-hydroxysteroid dehydrogenase type 2) (3-alpha-HSD type 2) (EC 1.1.1.213) (Chlordecone reductase homolog HAKRb) (Dihydrodiol dehydrogenase 3) (DD-3) (DD3) (Dihydrodiol dehydrogenase type I) (HA1753) (Indanol dehydrogenase) (EC 1.1.1.112) (Prostagla…	AKR1C3 DDH1 HSD17B5 KIAA0119 PGFS	Homo sapiens (Human)	323
P17516	AK1C4_HUMAN	reviewed	Aldo-keto reductase family 1 member C4 (EC 1.1.1.-) (3-alpha-HSD1) (3-alpha-hydroxysteroid dehydrogenase type I) (EC 1.1.1.50) (Chlordecone reductase) (CDR) (EC 1.1.1.225) (Dihydrodiol dehydrogenase 4) (DD-4) (DD4) (HAKRA)	AKR1C4 CHDR	Homo sapiens (Human)	323
P51857	AK1D1_HUMAN	reviewed	3-oxo-5-beta-steroid 4-dehydrogenase (EC 1.3.1.3) (Aldo-keto reductase family 1 member D1) (Delta(4)-3-ketosteroid 5-beta-reductase) (Delta(4)-3-oxosteroid 5-beta-reductase)	AKR1D1 SRD5B1	Homo sapiens (Human)	326
O43572	AKA10_HUMAN	reviewed	A-kinase anchor protein 10, mitochondrial (AKAP-10) (Dual specificity A kinase-anchoring protein 2) (D-AKAP-2) (Protein kinase A-anchoring protein 10) (PRKA10)	AKAP10	Homo sapiens (Human)	662
Q9UKA4	AKA11_HUMAN	reviewed	A-kinase anchor protein 11 (AKAP-11) (A-kinase anchor protein 220 kDa) (AKAP 220) (hAKAP220) (Protein kinase A-anchoring protein 11) (PRKA11)	AKAP11 AKAP220 KIAA0629	Homo sapiens (Human)	1901
Q02952	AKA12_HUMAN	reviewed	A-kinase anchor protein 12 (AKAP-12) (A-kinase anchor protein 250 kDa) (AKAP 250) (Gravin) (Myasthenia gravis autoantigen)	AKAP12 AKAP250	Homo sapiens (Human)	1782
Q86UN6	AKA28_HUMAN	reviewed	A-kinase anchor protein 14 (AKAP-14) (A-kinase anchor protein 28 kDa) (AKAP 28) (Protein kinase A-anchoring protein 14) (PRKA14)	AKAP14 AKAP28	Homo sapiens (Human)	197
O43687	AKA7A_HUMAN	reviewed	A-kinase anchor protein 7 isoforms alpha and beta (AKAP-7 isoforms alpha and beta) (A-kinase anchor protein 18 kDa) (AKAP 18) (Protein kinase A-anchoring protein 7 isoforms alpha/beta) (PRKA7 isoforms alpha/beta)	AKAP7 AKAP15 AKAP18	Homo sapiens (Human)	104
Q9P0M2	AKA7G_HUMAN	reviewed	A-kinase anchor protein 7 isoform gamma (AKAP-7 isoform gamma) (A-kinase anchor protein 18 kDa) (AKAP 18) (Protein kinase A-anchoring protein 7 isoform gamma) (PRKA7 isoform gamma)	AKAP7 AKAP18	Homo sapiens (Human)	348
Q92667	AKAP1_HUMAN	reviewed	A-kinase anchor protein 1, mitochondrial (A-kinase anchor protein 149 kDa) (AKAP 149) (Dual specificity A-kinase-anchoring protein 1) (D-AKAP-1) (Protein kinase A-anchoring protein 1) (PRKA1) (Spermatid A-kinase anchor protein 84) (S-AKAP84)	AKAP1 AKAP149 PRKA1	Homo sapiens (Human)	903
Q9Y2D5	AKAP2_HUMAN	reviewed	A-kinase anchor protein 2 (AKAP-2) (AKAP-KL) (Protein kinase A-anchoring protein 2) (PRKA2)	AKAP2 KIAA0920 PRKA2	Homo sapiens (Human)	859
O75969	AKAP3_HUMAN	reviewed	A-kinase anchor protein 3 (AKAP-3) (A-kinase anchor protein 110 kDa) (AKAP 110) (Cancer/testis antigen 82) (CT82) (Fibrous sheath protein of 95 kDa) (FSP95) (Fibrousheathin I) (Fibrousheathin-1) (Protein kinase A-anchoring protein 3) (PRKA3) (Sperm oocyte-binding protein)	AKAP3 AKAP110 SOB1	Homo sapiens (Human)	853
Q5JQC9	AKAP4_HUMAN	reviewed	A-kinase anchor protein 4 (AKAP-4) (A-kinase anchor protein 82 kDa) (AKAP 82) (hAKAP82) (Major sperm fibrous sheath protein) (HI) (Protein kinase A-anchoring protein 4) (PRKA4)	AKAP4 AKAP82	Homo sapiens (Human)	854
P24588	AKAP5_HUMAN	reviewed	A-kinase anchor protein 5 (AKAP-5) (A-kinase anchor protein 79 kDa) (AKAP 79) (H21) (cAMP-dependent protein kinase regulatory subunit II high affinity-binding protein)	AKAP5 AKAP79	Homo sapiens (Human)	427
Q13023	AKAP6_HUMAN	reviewed	A-kinase anchor protein 6 (AKAP-6) (A-kinase anchor protein 100 kDa) (AKAP 100) (Protein kinase A-anchoring protein 6) (PRKA6) (mAKAP)	AKAP6 AKAP100 KIAA0311	Homo sapiens (Human)	2319
O43823	AKAP8_HUMAN	reviewed	A-kinase anchor protein 8 (AKAP-8) (A-kinase anchor protein 95 kDa) (AKAP 95)	AKAP8 AKAP95	Homo sapiens (Human)	692
Q99996	AKAP9_HUMAN	reviewed	A-kinase anchor protein 9 (AKAP-9) (A-kinase anchor protein 350 kDa) (AKAP 350) (hgAKAP 350) (A-kinase anchor protein 450 kDa) (AKAP 450) (AKAP 120-like protein) (Centrosome- and Golgi-localized PKN-associated protein) (CG-NAP) (Protein hyperion) (Protein kinase A-anchoring protein 9) (PRKA9) (Protein yotiao)	AKAP9 AKAP350 AKAP450 KIAA0803	Homo sapiens (Human)	3911
Q5T2L2	AKCL1_HUMAN	reviewed	Aldo-keto reductase family 1 member C-like protein 1 (EC 1.1.1.-)	AKR1CL1	Homo sapiens (Human)	129
Q96JD6	AKCL2_HUMAN	reviewed	1,5-anhydro-D-fructose reductase (AF reductase) (EC 1.1.1.263) (Aldo-keto reductase family 1 member C-like protein 2) (Aldo-keto reductase family 1 member E2) (LoopADR) (Testis-specific protein) (hTSP)	AKR1E2 AKR1CL2 AKRDC1	Homo sapiens (Human)	320
Q495B1	AKD1A_HUMAN	reviewed	Ankyrin repeat and death domain-containing protein 1A	ANKDD1A	Homo sapiens (Human)	522
A6NHY2	AKD1B_HUMAN	reviewed	Ankyrin repeat and death domain-containing protein 1B	ANKDD1B	Homo sapiens (Human)	528
Q5TCS8	AKD1_HUMAN	reviewed	Adenylate kinase domain-containing protein 1 (Adenylate kinase domain-containing protein 2)	AKD1 AKD2 C6orf199 C6orf224	Homo sapiens (Human)	1911
Q9P2G1	AKIB1_HUMAN	reviewed	Ankyrin repeat and IBR domain-containing protein 1	ANKIB1 KIAA1386	Homo sapiens (Human)	1089
Q9NQ31	AKIP1_HUMAN	reviewed	A-kinase-interacting protein 1 (Breast cancer-associated gene 3 protein) (PKA-interacting protein) (Proline-rich protein BCA3)	AKIP1 BCA3 C11orf17	Homo sapiens (Human)	210
Q9NWT8	AKIP_HUMAN	reviewed	Aurora kinase A-interacting protein (AURKA-interacting protein)	AURKAIP1 AIP AKIP	Homo sapiens (Human)	199
Q9H9L7	AKIR1_HUMAN	reviewed	Akirin-1	AKIRIN1 C1orf108	Homo sapiens (Human)	192
Q53H80	AKIR2_HUMAN	reviewed	Akirin-2	AKIRIN2 C6orf166	Homo sapiens (Human)	203
Q7Z591	AKNA_HUMAN	reviewed	AT-hook-containing transcription factor	AKNA KIAA1968	Homo sapiens (Human)	1439
Q5T1N1	AKND1_HUMAN	reviewed	Protein AKNAD1	AKNAD1 C1orf62	Homo sapiens (Human)	836
Q12802	AKP13_HUMAN	reviewed	A-kinase anchor protein 13 (AKAP-13) (AKAP-Lbc) (Breast cancer nuclear receptor-binding auxiliary protein) (Guanine nucleotide exchange factor Lbc) (Human thyroid-anchoring protein 31) (Lymphoid blast crisis oncogene) (LBC oncogene) (Non-oncogenic Rho GTPase-specific GTP exchange factor) (Protein kinase A-anchoring protein 13) (PRKA13) (p47)	AKAP13 BRX HT31 LBC	Homo sapiens (Human)	2813
Q9ULX6	AKP8L_HUMAN	reviewed	A-kinase anchor protein 8-like (AKAP8-like protein) (Helicase A-binding protein 95) (HAP95) (Homologous to AKAP95 protein) (HA95) (Neighbor of A-kinase-anchoring protein 95) (Neighbor of AKAP95)	AKAP8L NAKAP NAKAP95 HRIHFB2018	Homo sapiens (Human)	646
P31749	AKT1_HUMAN	reviewed	RAC-alpha serine/threonine-protein kinase (EC 2.7.11.1) (Protein kinase B) (PKB) (Protein kinase B alpha) (PKB alpha) (Proto-oncogene c-Akt) (RAC-PK-alpha)	AKT1 PKB RAC	Homo sapiens (Human)	480
P31751	AKT2_HUMAN	reviewed	RAC-beta serine/threonine-protein kinase (EC 2.7.11.1) (Protein kinase Akt-2) (Protein kinase B beta) (PKB beta) (RAC-PK-beta)	AKT2	Homo sapiens (Human)	481
Q9Y243	AKT3_HUMAN	reviewed	RAC-gamma serine/threonine-protein kinase (EC 2.7.11.1) (Protein kinase Akt-3) (Protein kinase B gamma) (PKB gamma) (RAC-PK-gamma) (STK-2)	AKT3 PKBG	Homo sapiens (Human)	479
Q9H8T0	AKTIP_HUMAN	reviewed	AKT-interacting protein (Ft1) (Fused toes protein homolog)	AKTIP FTS	Homo sapiens (Human)	292
Q96B36	AKTS1_HUMAN	reviewed	Proline-rich AKT1 substrate 1 (40 kDa proline-rich AKT substrate)	AKT1S1 PRAS40	Homo sapiens (Human)	256
Q8N8R7	AL14E_HUMAN	reviewed	ARL14 effector protein (ARF7 effector protein)	ARL14EP ARF7EP C11orf46	Homo sapiens (Human)	260
P00352	AL1A1_HUMAN	reviewed	Retinal dehydrogenase 1 (RALDH 1) (RalDH1) (EC 1.2.1.36) (ALDH-E1) (ALHDII) (Aldehyde dehydrogenase family 1 member A1) (Aldehyde dehydrogenase, cytosolic)	ALDH1A1 ALDC ALDH1 PUMB1	Homo sapiens (Human)	501
O94788	AL1A2_HUMAN	reviewed	Retinal dehydrogenase 2 (RALDH 2) (RalDH2) (EC 1.2.1.36) (Aldehyde dehydrogenase family 1 member A2) (Retinaldehyde-specific dehydrogenase type 2) (RALDH(II))	ALDH1A2 RALDH2	Homo sapiens (Human)	518
P47895	AL1A3_HUMAN	reviewed	Aldehyde dehydrogenase family 1 member A3 (EC 1.2.1.5) (Aldehyde dehydrogenase 6) (Retinaldehyde dehydrogenase 3) (RALDH-3) (RalDH3)	ALDH1A3 ALDH6	Homo sapiens (Human)	512
P30837	AL1B1_HUMAN	reviewed	Aldehyde dehydrogenase X, mitochondrial (EC 1.2.1.3) (Aldehyde dehydrogenase 5) (Aldehyde dehydrogenase family 1 member B1)	ALDH1B1 ALDH5 ALDHX	Homo sapiens (Human)	517
O75891	AL1L1_HUMAN	reviewed	Cytosolic 10-formyltetrahydrofolate dehydrogenase (10-FTHFDH) (FDH) (EC 1.5.1.6) (Aldehyde dehydrogenase family 1 member L1)	ALDH1L1 FTHFD	Homo sapiens (Human)	902
Q3SY69	AL1L2_HUMAN	reviewed	Mitochondrial 10-formyltetrahydrofolate dehydrogenase (Mitochondrial 10-FTHFDH) (mtFDH) (EC 1.5.1.6) (Aldehyde dehydrogenase family 1 member L2)	ALDH1L2	Homo sapiens (Human)	923
Q60I27	AL2CL_HUMAN	reviewed	ALS2 C-terminal-like protein	ALS2CL	Homo sapiens (Human)	953
Q8N187	AL2S8_HUMAN	reviewed	Amyotrophic lateral sclerosis 2 chromosomal region candidate gene 8 protein (Calcium-response factor) (CaRF) (Testis development protein NYD-SP24)	ALS2CR8 CARF	Homo sapiens (Human)	725
Q53TS8	AL2SA_HUMAN	reviewed	Amyotrophic lateral sclerosis 2 chromosomal region candidate gene 11 protein	ALS2CR11	Homo sapiens (Human)	623
Q96Q35	AL2SB_HUMAN	reviewed	Amyotrophic lateral sclerosis 2 chromosomal region candidate gene 12 protein	ALS2CR12	Homo sapiens (Human)	445
P30838	AL3A1_HUMAN	reviewed	Aldehyde dehydrogenase, dimeric NADP-preferring (EC 1.2.1.5) (ALDHIII) (Aldehyde dehydrogenase 3) (Aldehyde dehydrogenase family 3 member A1)	ALDH3A1 ALDH3	Homo sapiens (Human)	453
P51648	AL3A2_HUMAN	reviewed	Fatty aldehyde dehydrogenase (EC 1.2.1.3) (Aldehyde dehydrogenase 10) (Aldehyde dehydrogenase family 3 member A2) (Microsomal aldehyde dehydrogenase)	ALDH3A2 ALDH10 FALDH	Homo sapiens (Human)	485
P43353	AL3B1_HUMAN	reviewed	Aldehyde dehydrogenase family 3 member B1 (EC 1.2.1.5) (Aldehyde dehydrogenase 7)	ALDH3B1 ALDH7	Homo sapiens (Human)	468
P48448	AL3B2_HUMAN	reviewed	Aldehyde dehydrogenase family 3 member B2 (EC 1.2.1.5) (Aldehyde dehydrogenase 8)	ALDH3B2 ALDH8	Homo sapiens (Human)	385
P30038	AL4A1_HUMAN	reviewed	Delta-1-pyrroline-5-carboxylate dehydrogenase, mitochondrial (P5C dehydrogenase) (EC 1.5.1.12) (Aldehyde dehydrogenase family 4 member A1)	ALDH4A1 ALDH4 P5CDH	Homo sapiens (Human)	563
P20292	AL5AP_HUMAN	reviewed	Arachidonate 5-lipoxygenase-activating protein (FLAP) (MK-886-binding protein)	ALOX5AP FLAP	Homo sapiens (Human)	161
P49419	AL7A1_HUMAN	reviewed	Alpha-aminoadipic semialdehyde dehydrogenase (Alpha-AASA dehydrogenase) (EC 1.2.1.31) (Aldehyde dehydrogenase family 7 member A1) (EC 1.2.1.3) (Antiquitin-1) (Betaine aldehyde dehydrogenase) (EC 1.2.1.8) (Delta1-piperideine-6-carboxylate dehydrogenase) (P6c dehydrogenase)	ALDH7A1 ATQ1	Homo sapiens (Human)	539
Q9H2A2	AL8A1_HUMAN	reviewed	Aldehyde dehydrogenase family 8 member A1 (EC 1.2.1.-) (Aldehyde dehydrogenase 12)	ALDH8A1 ALDH12	Homo sapiens (Human)	487
P49189	AL9A1_HUMAN	reviewed	4-trimethylaminobutyraldehyde dehydrogenase (TMABADH) (EC 1.2.1.47) (Aldehyde dehydrogenase E3 isozyme) (Aldehyde dehydrogenase family 9 member A1) (EC 1.2.1.3) (Gamma-aminobutyraldehyde dehydrogenase) (EC 1.2.1.19) (R-aminobutyraldehyde dehydrogenase)	ALDH9A1 ALDH4 ALDH7 ALDH9	Homo sapiens (Human)	494
P24298	ALAT1_HUMAN	reviewed	Alanine aminotransferase 1 (ALT1) (EC 2.6.1.2) (Glutamate pyruvate transaminase 1) (GPT 1) (Glutamic--alanine transaminase 1) (Glutamic--pyruvic transaminase 1)	GPT AAT1 GPT1	Homo sapiens (Human)	496
Q8TD30	ALAT2_HUMAN	reviewed	Alanine aminotransferase 2 (ALT2) (EC 2.6.1.2) (Glutamate pyruvate transaminase 2) (GPT 2) (Glutamic--alanine transaminase 2) (Glutamic--pyruvic transaminase 2)	GPT2 AAT2 ALT2	Homo sapiens (Human)	523
P02768	ALBU_HUMAN	reviewed	Serum albumin	ALB GIG20 GIG42 PRO0903 PRO1708 PRO2044 PRO2619 PRO2675 UNQ696/PRO1341	Homo sapiens (Human)	609
P05091	ALDH2_HUMAN	reviewed	Aldehyde dehydrogenase, mitochondrial (EC 1.2.1.3) (ALDH class 2) (ALDH-E2) (ALDHI)	ALDH2 ALDM	Homo sapiens (Human)	517
P04075	ALDOA_HUMAN	reviewed	Fructose-bisphosphate aldolase A (EC 4.1.2.13) (Lung cancer antigen NY-LU-1) (Muscle-type aldolase)	ALDOA ALDA	Homo sapiens (Human)	364
P05062	ALDOB_HUMAN	reviewed	Fructose-bisphosphate aldolase B (EC 4.1.2.13) (Liver-type aldolase)	ALDOB ALDB	Homo sapiens (Human)	364
P09972	ALDOC_HUMAN	reviewed	Fructose-bisphosphate aldolase C (EC 4.1.2.13) (Brain-type aldolase)	ALDOC ALDC	Homo sapiens (Human)	364
P15121	ALDR_HUMAN	reviewed	Aldose reductase (AR) (EC 1.1.1.21) (Aldehyde reductase) (Aldo-keto reductase family 1 member B1)	AKR1B1 ALDR1	Homo sapiens (Human)	316
P84996	ALEX_HUMAN	reviewed	Protein ALEX (Alternative gene product encoded by XL-exon)	GNAS GNAS1	Homo sapiens (Human)	626
Q2TAA5	ALG11_HUMAN	reviewed	GDP-Man:Man(3)GlcNAc(2)-PP-Dol alpha-1,2-mannosyltransferase (EC 2.4.1.131) (Asparagine-linked glycosylation protein 11 homolog) (Glycolipid 2-alpha-mannosyltransferase)	ALG11 GT8	Homo sapiens (Human)	492
Q9BV10	ALG12_HUMAN	reviewed	Dol-P-Man:Man(7)GlcNAc(2)-PP-Dol alpha-1,6-mannosyltransferase (EC 2.4.1.260) (Asparagine-linked glycosylation protein 12 homolog) (hALG12) (Dolichyl-P-Man:Man(7)GlcNAc(2)-PP-dolichyl-alpha-1,6-mannosyltransferase) (Mannosyltransferase ALG12 homolog) (Membrane protein SB87)	ALG12 PP14673	Homo sapiens (Human)	488
Q9NP73	ALG13_HUMAN	reviewed	UDP-N-acetylglucosamine transferase subunit ALG13 homolog (EC 2.4.1.141) (Asparagine-linked glycosylation 13 homolog) (Glycosyltransferase 28 domain-containing protein 1)	ALG13 CXorf45 GLT28D1 MDS031	Homo sapiens (Human)	1137
Q96F25	ALG14_HUMAN	reviewed	UDP-N-acetylglucosamine transferase subunit ALG14 homolog	ALG14	Homo sapiens (Human)	216
Q6GMV1	ALG1L_HUMAN	reviewed	Putative glycosyltransferase ALG1-like (EC 2.4.1.-)	ALG1L	Homo sapiens (Human)	187
Q9BT22	ALG1_HUMAN	reviewed	Chitobiosyldiphosphodolichol beta-mannosyltransferase (EC 2.4.1.142) (Asparagine-linked glycosylation protein 1 homolog) (Beta-1,4-mannosyltransferase) (GDP-Man:GlcNAc2-PP-dolichol mannosyltransferase) (GDP-mannose-dolichol diphosphochitobiose mannosyltransferase) (Mannosyltransferase-1) (MT-1) (hMat-1)	ALG1 HMAT1 HMT1 PSEC0061 UNQ861/PRO1870	Homo sapiens (Human)	464
Q9H553	ALG2_HUMAN	reviewed	Alpha-1,3/1,6-mannosyltransferase ALG2 (EC 2.4.1.132) (EC 2.4.1.257) (Asparagine-linked glycosylation protein 2 homolog) (GDP-Man:Man(1)GlcNAc(2)-PP-Dol alpha-1,3-mannosyltransferase) (GDP-Man:Man(1)GlcNAc(2)-PP-dolichol mannosyltransferase) (GDP-Man:Man(2)GlcNAc(2)-PP-Dol alpha-1,6-mannosyltransferase)	ALG2 UNQ666/PRO1298	Homo sapiens (Human)	416
Q92685	ALG3_HUMAN	reviewed	Dol-P-Man:Man(5)GlcNAc(2)-PP-Dol alpha-1,3-mannosyltransferase (EC 2.4.1.258) (Asparagine-linked glycosylation protein 3 homolog) (Dol-P-Man-dependent alpha(1-3)-mannosyltransferase) (Dolichyl-P-Man:Man(5)GlcNAc(2)-PP-dolichyl mannosyltransferase) (Dolichyl-phosphate-mannose--glycolipid alpha-mannosyltransferase) (Not56-like protein)	ALG3 NOT NOT56L	Homo sapiens (Human)	438
Q9Y673	ALG5_HUMAN	reviewed	Dolichyl-phosphate beta-glucosyltransferase (DolP-glucosyltransferase) (EC 2.4.1.117) (Asparagine-linked glycosylation protein 5 homolog)	ALG5 HSPC149	Homo sapiens (Human)	324
Q9Y672	ALG6_HUMAN	reviewed	Dolichyl pyrophosphate Man9GlcNAc2 alpha-1,3-glucosyltransferase (EC 2.4.1.267) (Asparagine-linked glycosylation protein 6 homolog) (Dol-P-Glc:Man(9)GlcNAc(2)-PP-Dol alpha-1,3-glucosyltransferase) (Dolichyl-P-Glc:Man9GlcNAc2-PP-dolichyl glucosyltransferase)	ALG6 My046	Homo sapiens (Human)	507
Q9BVK2	ALG8_HUMAN	reviewed	Probable dolichyl pyrophosphate Glc1Man9GlcNAc2 alpha-1,3-glucosyltransferase (EC 2.4.1.265) (Asparagine-linked glycosylation protein 8 homolog) (Dol-P-Glc:Glc(1)Man(9)GlcNAc(2)-PP-dolichyl alpha-1,3-glucosyltransferase) (Dolichyl-P-Glc:Glc1Man9GlcNAc2-PP-dolichyl glucosyltransferase)	ALG8 HUSSY-02	Homo sapiens (Human)	526
Q9H6U8	ALG9_HUMAN	reviewed	Alpha-1,2-mannosyltransferase ALG9 (EC 2.4.1.259) (EC 2.4.1.261) (Asparagine-linked glycosylation protein 9 homolog) (Disrupted in bipolar disorder protein 1) (Dol-P-Man:Man(6)GlcNAc(2)-PP-Dol alpha-1,2-mannosyltransferase) (Dol-P-Man:Man(8)GlcNAc(2)-PP-Dol alpha-1,2-mannosyltransferase)	ALG9 DIBD1	Homo sapiens (Human)	611
Q13686	ALKB1_HUMAN	reviewed	Alkylated DNA repair protein alkB homolog 1 (EC 1.14.11.33) (Alpha-ketoglutarate-dependent dioxygenase ABH1) (DNA lyase ABH1) (EC 4.2.99.18) (DNA oxidative demethylase ALKBH1)	ALKBH1 ABH ABH1 ALKBH	Homo sapiens (Human)	389
Q6NS38	ALKB2_HUMAN	reviewed	Alpha-ketoglutarate-dependent dioxygenase alkB homolog 2 (EC 1.14.11.33) (Alkylated DNA repair protein alkB homolog 2) (DNA oxidative demethylase ALKBH2) (Oxy DC1)	ALKBH2 ABH2	Homo sapiens (Human)	261
Q96Q83	ALKB3_HUMAN	reviewed	Alpha-ketoglutarate-dependent dioxygenase alkB homolog 3 (EC 1.14.11.-) (Alkylated DNA repair protein alkB homolog 3) (DEPC-1) (Prostate cancer antigen 1)	ALKBH3 ABH3 DEPC1	Homo sapiens (Human)	286
Q9NXW9	ALKB4_HUMAN	reviewed	Alpha-ketoglutarate-dependent dioxygenase alkB homolog 4 (EC 1.14.11.-) (Alkylated DNA repair protein alkB homolog 4)	ALKBH4 ABH4	Homo sapiens (Human)	302
Q6P6C2	ALKB5_HUMAN	reviewed	RNA demethylase ALKBH5 (EC 1.14.11.-) (Alkylated DNA repair protein alkB homolog 5) (Alpha-ketoglutarate-dependent dioxygenase alkB homolog 5)	ALKBH5 ABH5 OFOXD1	Homo sapiens (Human)	394
Q3KRA9	ALKB6_HUMAN	reviewed	Alpha-ketoglutarate-dependent dioxygenase alkB homolog 6 (EC 1.14.11.-) (Alkylated DNA repair protein alkB homolog 6)	ALKBH6 ABH6	Homo sapiens (Human)	238
Q9BT30	ALKB7_HUMAN	reviewed	Alpha-ketoglutarate-dependent dioxygenase alkB homolog 7 (EC 1.14.11.-) (Alkylated DNA repair protein alkB homolog 7) (Spermatogenesis cell proliferation-related protein) (Spermatogenesis-associated protein 11)	ALKBH7 ABH7 SPATA11 UNQ6002/PRO34564	Homo sapiens (Human)	221
Q96BT7	ALKB8_HUMAN	reviewed	Alkylated DNA repair protein alkB homolog 8 (EC 1.14.11.-) (Probable alpha-ketoglutarate-dependent dioxygenase ABH8) (S-adenosyl-L-methionine-dependent tRNA methyltransferase ABH8) (tRNA (carboxymethyluridine(34)-5-O)-methyltransferase ABH8) (EC 2.1.1.229)	ALKBH8 ABH8	Homo sapiens (Human)	664
Q6ZNB7	ALKMO_HUMAN	reviewed	Alkylglycerol monooxygenase (EC 1.14.16.5) (Transmembrane protein 195)	AGMO TMEM195	Homo sapiens (Human)	445
Q9UM73	ALK_HUMAN	reviewed	ALK tyrosine kinase receptor (EC 2.7.10.1) (Anaplastic lymphoma kinase) (CD antigen CD246)	ALK	Homo sapiens (Human)	1620
Q8N6M5	ALLC_HUMAN	reviewed	Probable allantoicase (EC 3.5.3.4) (Allantoate amidinohydrolase)	ALLC	Homo sapiens (Human)	410
Q96L16	ALM1L_HUMAN	reviewed	Putative ALMS1-like protein	ALMS1P ALMS1L	Homo sapiens (Human)	210
Q8TCU4	ALMS1_HUMAN	reviewed	Alstrom syndrome protein 1	ALMS1 KIAA0328	Homo sapiens (Human)	4167
Q96QP1	ALPK1_HUMAN	reviewed	Alpha-protein kinase 1 (EC 2.7.11.-) (Chromosome 4 kinase) (Lymphocyte alpha-protein kinase)	ALPK1 KIAA1527 LAK	Homo sapiens (Human)	1244
Q86TB3	ALPK2_HUMAN	reviewed	Alpha-protein kinase 2 (EC 2.7.11.-) (Heart alpha-protein kinase)	ALPK2 HAK	Homo sapiens (Human)	2170
Q96L96	ALPK3_HUMAN	reviewed	Alpha-protein kinase 3 (EC 2.7.11.-) (Muscle alpha-protein kinase)	ALPK3 KIAA1330 MAK	Homo sapiens (Human)	1907
P55789	ALR_HUMAN	reviewed	FAD-linked sulfhydryl oxidase ALR (EC 1.8.3.2) (Augmenter of liver regeneration) (hERV1) (Hepatopoietin)	GFER ALR HERV1 HPO	Homo sapiens (Human)	205
Q96Q42	ALS2_HUMAN	reviewed	Alsin (Amyotrophic lateral sclerosis 2 chromosomal region candidate gene 6 protein) (Amyotrophic lateral sclerosis 2 protein)	ALS2 ALS2CR6 KIAA1563	Homo sapiens (Human)	1657
P35858	ALS_HUMAN	reviewed	Insulin-like growth factor-binding protein complex acid labile subunit (ALS)	IGFALS ALS	Homo sapiens (Human)	605
Q15699	ALX1_HUMAN	reviewed	ALX homeobox protein 1 (Cartilage homeoprotein 1) (CART-1)	ALX1 CART1	Homo sapiens (Human)	326
O95076	ALX3_HUMAN	reviewed	Homeobox protein aristaless-like 3 (Proline-rich transcription factor ALX3)	ALX3	Homo sapiens (Human)	343
Q9H161	ALX4_HUMAN	reviewed	Homeobox protein aristaless-like 4	ALX4 KIAA1788	Homo sapiens (Human)	411
Q9UHK6	AMACR_HUMAN	reviewed	Alpha-methylacyl-CoA racemase (EC 5.1.99.4) (2-methylacyl-CoA racemase)	AMACR	Homo sapiens (Human)	382
Q9NP70	AMBN_HUMAN	reviewed	Ameloblastin	AMBN	Homo sapiens (Human)	447
P02760	AMBP_HUMAN	reviewed	Protein AMBP [Cleaved into: Alpha-1-microglobulin (Protein HC) (Alpha-1 microglycoprotein) (Complex-forming glycoprotein heterogeneous in charge); Inter-alpha-trypsin inhibitor light chain (ITI-LC) (Bikunin) (EDC1) (HI-30) (Uronic-acid-rich protein); Trypstatin]	AMBP HCP ITIL	Homo sapiens (Human)	352
P19021	AMD_HUMAN	reviewed	Peptidyl-glycine alpha-amidating monooxygenase (PAM) [Includes: Peptidylglycine alpha-hydroxylating monooxygenase (PHM) (EC 1.14.17.3); Peptidyl-alpha-hydroxyglycine alpha-amidating lyase (EC 4.3.2.5) (Peptidylamidoglycolate lyase) (PAL)]	PAM	Homo sapiens (Human)	973
Q99217	AMELX_HUMAN	reviewed	Amelogenin, X isoform	AMELX AMG AMGX	Homo sapiens (Human)	191
Q99218	AMELY_HUMAN	reviewed	Amelogenin, Y isoform	AMELY AMGL AMGY	Homo sapiens (Human)	206
Q5JTC6	AMER1_HUMAN	reviewed	APC membrane recruitment protein 1 (Amer1) (Protein FAM123B) (Wilms tumor gene on the X chromosome protein)	AMER1 FAM123B WTX	Homo sapiens (Human)	1135
Q8N7J2	AMER2_HUMAN	reviewed	APC membrane recruitment protein 2 (Amer2) (Protein FAM123A)	AMER2 FAM123A	Homo sapiens (Human)	671
Q8N944	AMER3_HUMAN	reviewed	APC membrane recruitment protein 3 (Amer3) (Protein FAM123C)	AMER3 FAM123C	Homo sapiens (Human)	861
Q6DCA0	AMERL_HUMAN	reviewed	AMMECR1-like protein	AMMECR1L	Homo sapiens (Human)	310
Q9UKV5	AMFR_HUMAN	reviewed	E3 ubiquitin-protein ligase AMFR (EC 6.3.2.-) (Autocrine motility factor receptor) (AMF receptor) (RING finger protein 45) (gp78)	AMFR RNF45	Homo sapiens (Human)	643
Q86WK6	AMGO1_HUMAN	reviewed	Amphoterin-induced protein 1 (AMIGO-1) (Alivin-2)	AMIGO1 ALI2 AMIGO KIAA1163	Homo sapiens (Human)	493
Q86SJ2	AMGO2_HUMAN	reviewed	Amphoterin-induced protein 2 (AMIGO-2) (Alivin-1) (Differentially expressed in gastric adenocarcinomas) (DEGA)	AMIGO2 ALI1	Homo sapiens (Human)	522
Q86WK7	AMGO3_HUMAN	reviewed	Amphoterin-induced protein 3 (AMIGO-3) (Alivin-3)	AMIGO3 ALI3 KIAA1851 UNQ6084/PRO20089	Homo sapiens (Human)	504
Q16671	AMHR2_HUMAN	reviewed	Anti-Muellerian hormone type-2 receptor (EC 2.7.11.30) (Anti-Muellerian hormone type II receptor) (AMH type II receptor) (MIS type II receptor) (MISRII) (MRII)	AMHR2 AMHR MISR2	Homo sapiens (Human)	573
Q9Y4X0	AMMR1_HUMAN	reviewed	AMME syndrome candidate gene 1 protein	AMMECR1	Homo sapiens (Human)	333
Q8IY45	AMN1_HUMAN	reviewed	Protein AMN1 homolog	AMN1	Homo sapiens (Human)	258
Q9BXJ7	AMNLS_HUMAN	reviewed	Protein amnionless	AMN UNQ513/PRO1028	Homo sapiens (Human)	453
Q8IY63	AMOL1_HUMAN	reviewed	Angiomotin-like protein 1	AMOTL1	Homo sapiens (Human)	956
Q9Y2J4	AMOL2_HUMAN	reviewed	Angiomotin-like protein 2 (Leman coiled-coil protein) (LCCP)	AMOTL2 KIAA0989	Homo sapiens (Human)	779
Q4VCS5	AMOT_HUMAN	reviewed	Angiomotin	AMOT KIAA1071	Homo sapiens (Human)	1084
Q6UB28	AMP1D_HUMAN	reviewed	Methionine aminopeptidase 1D, mitochondrial (EC 3.4.11.18) (Methionyl aminopeptidase type 1D, mitochondrial)	METAP1D MAP1D	Homo sapiens (Human)	335
Q9H4A4	AMPB_HUMAN	reviewed	Aminopeptidase B (AP-B) (EC 3.4.11.6) (Arginine aminopeptidase) (Arginyl aminopeptidase)	RNPEP APB	Homo sapiens (Human)	650
P23109	AMPD1_HUMAN	reviewed	AMP deaminase 1 (EC 3.5.4.6) (AMP deaminase isoform M) (Myoadenylate deaminase)	AMPD1	Homo sapiens (Human)	780
Q01433	AMPD2_HUMAN	reviewed	AMP deaminase 2 (EC 3.5.4.6) (AMP deaminase isoform L)	AMPD2	Homo sapiens (Human)	879
Q01432	AMPD3_HUMAN	reviewed	AMP deaminase 3 (EC 3.5.4.6) (AMP deaminase isoform E) (Erythrocyte AMP deaminase)	AMPD3	Homo sapiens (Human)	767
Q07075	AMPE_HUMAN	reviewed	Glutamyl aminopeptidase (EAP) (EC 3.4.11.7) (Aminopeptidase A) (AP-A) (Differentiation antigen gp160) (CD antigen CD249)	ENPEP	Homo sapiens (Human)	957
P49418	AMPH_HUMAN	reviewed	Amphiphysin	AMPH AMPH1	Homo sapiens (Human)	695
P28838	AMPL_HUMAN	reviewed	Cytosol aminopeptidase (EC 3.4.11.1) (Leucine aminopeptidase 3) (LAP-3) (Leucyl aminopeptidase) (Peptidase S) (Proline aminopeptidase) (EC 3.4.11.5) (Prolyl aminopeptidase)	LAP3 LAPEP PEPS	Homo sapiens (Human)	519
P53582	AMPM1_HUMAN	reviewed	Methionine aminopeptidase 1 (MAP 1) (MetAP 1) (EC 3.4.11.18) (Peptidase M 1)	METAP1 KIAA0094	Homo sapiens (Human)	386
P50579	AMPM2_HUMAN	reviewed	Methionine aminopeptidase 2 (MAP 2) (MetAP 2) (EC 3.4.11.18) (Initiation factor 2-associated 67 kDa glycoprotein) (Peptidase M 2) (p67eIF2) (p67)	METAP2 MNPEP P67EIF2	Homo sapiens (Human)	478
P15144	AMPN_HUMAN	reviewed	Aminopeptidase N (AP-N) (hAPN) (EC 3.4.11.2) (Alanyl aminopeptidase) (Aminopeptidase M) (AP-M) (Microsomal aminopeptidase) (Myeloid plasma membrane glycoprotein CD13) (gp150) (CD antigen CD13)	ANPEP APN CD13 PEPN	Homo sapiens (Human)	967
Q8N6M6	AMPO_HUMAN	reviewed	Aminopeptidase O (AP-O) (EC 3.4.11.-)	AOPEP C9orf3 ONPEP	Homo sapiens (Human)	819
Q6Q4G3	AMPQ_HUMAN	reviewed	Aminopeptidase Q (AP-Q) (EC 3.4.11.-) (CHL2 antigen) (Laeverin)	AQPEP LVRN	Homo sapiens (Human)	990
Q9C0C7	AMRA1_HUMAN	reviewed	Activating molecule in BECN1-regulated autophagy protein 1	AMBRA1 KIAA1736	Homo sapiens (Human)	1298
P30533	AMRP_HUMAN	reviewed	Alpha-2-macroglobulin receptor-associated protein (Alpha-2-MRAP) (Low density lipoprotein receptor-related protein-associated protein 1) (RAP)	LRPAP1 A2MRAP	Homo sapiens (Human)	357
Q6UX39	AMTN_HUMAN	reviewed	Amelotin	AMTN UNQ689/PRO1329	Homo sapiens (Human)	209
P04745	AMY1_HUMAN	reviewed	Alpha-amylase 1 (EC 3.2.1.1) (1,4-alpha-D-glucan glucanohydrolase 1) (Salivary alpha-amylase)	AMY1A AMY1; AMY1B AMY1; AMY1C AMY1	Homo sapiens (Human)	511
P19961	AMY2B_HUMAN	reviewed	Alpha-amylase 2B (EC 3.2.1.1) (1,4-alpha-D-glucan glucanohydrolase 2B) (Carcinoid alpha-amylase)	AMY2B	Homo sapiens (Human)	511
P04746	AMYP_HUMAN	reviewed	Pancreatic alpha-amylase (PA) (EC 3.2.1.1) (1,4-alpha-D-glucan glucanohydrolase)	AMY2A	Homo sapiens (Human)	511
Q400G9	AMZ1_HUMAN	reviewed	Archaemetzincin-1 (EC 3.4.-.-) (Archeobacterial metalloproteinase-like protein 1)	AMZ1 KIAA1950	Homo sapiens (Human)	498
Q86W34	AMZ2_HUMAN	reviewed	Archaemetzincin-2 (EC 3.4.-.-) (Archeobacterial metalloproteinase-like protein 2)	AMZ2 BM-014	Homo sapiens (Human)	360
Q8IZ07	AN13A_HUMAN	reviewed	Ankyrin repeat domain-containing protein 13A (Protein KE03)	ANKRD13A ANKRD13	Homo sapiens (Human)	590
Q86YJ7	AN13B_HUMAN	reviewed	Ankyrin repeat domain-containing protein 13B	ANKRD13B	Homo sapiens (Human)	626
Q8N6S4	AN13C_HUMAN	reviewed	Ankyrin repeat domain-containing protein 13C	ANKRD13C	Homo sapiens (Human)	541
Q6ZTN6	AN13D_HUMAN	reviewed	Ankyrin repeat domain-containing protein 13D	ANKRD13D	Homo sapiens (Human)	518
Q8IVF6	AN18A_HUMAN	reviewed	Ankyrin repeat domain-containing protein 18A	ANKRD18A KIAA2015	Homo sapiens (Human)	992
A2A2Z9	AN18B_HUMAN	reviewed	Ankyrin repeat domain-containing protein 18B	ANKRD18B	Homo sapiens (Human)	1011
Q5CZ79	AN20B_HUMAN	reviewed	Ankyrin repeat domain-containing protein 20B (Ankyrin repeat domain-containing protein 20A pseudogene)	ANKRD20A8P ANKRD20B	Homo sapiens (Human)	823
Q9BXX3	AN30A_HUMAN	reviewed	Ankyrin repeat domain-containing protein 30A (Serologically defined breast cancer antigen NY-BR-1)	ANKRD30A	Homo sapiens (Human)	1397
Q9BXX2	AN30B_HUMAN	reviewed	Ankyrin repeat domain-containing protein 30B (Serologically defined breast cancer antigen NY-BR-1.1)	ANKRD30B	Homo sapiens (Human)	1392
P39687	AN32A_HUMAN	reviewed	Acidic leucine-rich nuclear phosphoprotein 32 family member A (Acidic nuclear phosphoprotein pp32) (Leucine-rich acidic nuclear protein) (LANP) (Mapmodulin) (Potent heat-stable protein phosphatase 2A inhibitor I1PP2A) (Putative HLA-DR-associated protein I) (PHAPI)	ANP32A C15orf1 LANP MAPM PHAP1	Homo sapiens (Human)	249
Q92688	AN32B_HUMAN	reviewed	Acidic leucine-rich nuclear phosphoprotein 32 family member B (Acidic protein rich in leucines) (Putative HLA-DR-associated protein I-2) (PHAPI2) (Silver-stainable protein SSP29)	ANP32B APRIL PHAPI2	Homo sapiens (Human)	251
O43423	AN32C_HUMAN	reviewed	Acidic leucine-rich nuclear phosphoprotein 32 family member C (Phosphoprotein 32-related protein 1) (Tumorigenic protein pp32r1)	ANP32C PP32R1	Homo sapiens (Human)	234
O95626	AN32D_HUMAN	reviewed	Acidic leucine-rich nuclear phosphoprotein 32 family member D (Phosphoprotein 32-related protein 2) (Tumorigenic protein pp32r2)	ANP32D PP32R2	Homo sapiens (Human)	131
Q9BTT0	AN32E_HUMAN	reviewed	Acidic leucine-rich nuclear phosphoprotein 32 family member E (LANP-like protein) (LANP-L)	ANP32E	Homo sapiens (Human)	268
A6NCL7	AN33B_HUMAN	reviewed	Ankyrin repeat domain-containing protein 33B	ANKRD33B	Homo sapiens (Human)	494
Q69YU3	AN34A_HUMAN	reviewed	Ankyrin repeat domain-containing protein 34A	ANKRD34A ANKRD34	Homo sapiens (Human)	496
A5PLL1	AN34B_HUMAN	reviewed	Ankyrin repeat domain-containing protein 34B	ANKRD34B	Homo sapiens (Human)	514
P0C6C1	AN34C_HUMAN	reviewed	Ankyrin repeat domain-containing protein 34C	ANKRD34C	Homo sapiens (Human)	530
A6QL64	AN36A_HUMAN	reviewed	Ankyrin repeat domain-containing protein 36A	ANKRD36 ANKRD36A KIAA1641 UNQ2430/PRO499	Homo sapiens (Human)	1941
Q8N2N9	AN36B_HUMAN	reviewed	Ankyrin repeat domain-containing protein 36B (CLL-associated antigen KW-1)	ANKRD36B	Homo sapiens (Human)	1353
Q5JPF3	AN36C_HUMAN	reviewed	Ankyrin repeat domain-containing protein 36C (Protein immuno-reactive with anti-PTH polyclonal antibodies)	ANKRD36C	Homo sapiens (Human)	1778
P54802	ANAG_HUMAN	reviewed	Alpha-N-acetylglucosaminidase (EC 3.2.1.50) (N-acetyl-alpha-glucosaminidase) (NAG) [Cleaved into: Alpha-N-acetylglucosaminidase 82 kDa form; Alpha-N-acetylglucosaminidase 77 kDa form]	NAGLU UFHSD1	Homo sapiens (Human)	743
Q9UJX6	ANC2_HUMAN	reviewed	Anaphase-promoting complex subunit 2 (APC2) (Cyclosome subunit 2)	ANAPC2 APC2 KIAA1406	Homo sapiens (Human)	822
P10275	ANDR_HUMAN	reviewed	Androgen receptor (Dihydrotestosterone receptor) (Nuclear receptor subfamily 3 group C member 4)	AR DHTR NR3C4	Homo sapiens (Human)	919
P16860	ANFB_HUMAN	reviewed	Natriuretic peptides B (Gamma-brain natriuretic peptide) [Cleaved into: Brain natriuretic peptide 32 (BNP(1-32)) (BNP-32); BNP(1-30); BNP(1-29); BNP(1-28); BNP(2-31); BNP(3-32); BNP(3-30); BNP(3-29); BNP(4-32); BNP(4-31); BNP(4-30); BNP(4-29); BNP(4-27); BNP(5-32); BNP(5-31); BNP(5-29)]	NPPB	Homo sapiens (Human)	134
P23582	ANFC_HUMAN	reviewed	C-type natriuretic peptide [Cleaved into: CNP-22; CNP-29; CNP-53]	NPPC CNP2	Homo sapiens (Human)	126
Q9P2R3	ANFY1_HUMAN	reviewed	Ankyrin repeat and FYVE domain-containing protein 1 (Ankyrin repeats hooked to a zinc finger motif)	ANKFY1 ANKHZN KIAA1255	Homo sapiens (Human)	1169
P01160	ANF_HUMAN	reviewed	Natriuretic peptides A (CDD-ANF) (Prepronatriodilatin) [Cleaved into: Cardiodilatin-related peptide (CDP); Atrial natriuretic factor (ANF) (Atrial natriuretic peptide) (ANP)]	NPPA ANP PND	Homo sapiens (Human)	153
Q9UNK9	ANGE1_HUMAN	reviewed	Protein angel homolog 1	ANGEL1 KIAA0759	Homo sapiens (Human)	670
Q5VTE6	ANGE2_HUMAN	reviewed	Protein angel homolog 2	ANGEL2 KIAA0759L	Homo sapiens (Human)	544
P03950	ANGI_HUMAN	reviewed	Angiogenin (EC 3.1.27.-) (Ribonuclease 5) (RNase 5)	ANG RNASE5	Homo sapiens (Human)	147
O95841	ANGL1_HUMAN	reviewed	Angiopoietin-related protein 1 (Angiopoietin-3) (ANG-3) (Angiopoietin-like protein 1)	ANGPTL1 ANG3 ANGPT3 ARP1 PSEC0154 UNQ162/PRO188	Homo sapiens (Human)	491
Q9UKU9	ANGL2_HUMAN	reviewed	Angiopoietin-related protein 2 (Angiopoietin-like protein 2)	ANGPTL2 ARP2 UNQ170/PRO196	Homo sapiens (Human)	493
Q9Y5C1	ANGL3_HUMAN	reviewed	Angiopoietin-related protein 3 (Angiopoietin-5) (ANG-5) (Angiopoietin-like protein 3)	ANGPTL3 ANGPT5 UNQ153/PRO179	Homo sapiens (Human)	460
Q9BY76	ANGL4_HUMAN	reviewed	Angiopoietin-related protein 4 (Angiopoietin-like protein 4) (Hepatic fibrinogen/angiopoietin-related protein) (HFARP)	ANGPTL4 ARP4 HFARP PGAR PP1158 PSEC0166 UNQ171/PRO197	Homo sapiens (Human)	406
Q86XS5	ANGL5_HUMAN	reviewed	Angiopoietin-related protein 5 (Angiopoietin-like protein 5)	ANGPTL5 UNQ5795/PRO19600	Homo sapiens (Human)	388
Q8NI99	ANGL6_HUMAN	reviewed	Angiopoietin-related protein 6 (Angiopoietin-like protein 6) (Angiopoietin-related growth factor) (Angiopoietin-related protein 5)	ANGPTL6 AGF ARP5 UNQ152/PRO178	Homo sapiens (Human)	470
O43827	ANGL7_HUMAN	reviewed	Angiopoietin-related protein 7 (Angiopoietin-like factor) (Angiopoietin-like protein 7) (Cornea-derived transcript 6 protein)	ANGPTL7 CDT6 UNQ313/PRO356	Homo sapiens (Human)	346
Q15389	ANGP1_HUMAN	reviewed	Angiopoietin-1 (ANG-1)	ANGPT1 KIAA0003	Homo sapiens (Human)	498
O15123	ANGP2_HUMAN	reviewed	Angiopoietin-2 (ANG-2)	ANGPT2	Homo sapiens (Human)	496
Q9Y264	ANGP4_HUMAN	reviewed	Angiopoietin-4 (ANG-4) (Angiopoietin-3) (ANG-3)	ANGPT4 ANG3 ANG4	Homo sapiens (Human)	503
P01019	ANGT_HUMAN	reviewed	Angiotensinogen (Serpin A8) [Cleaved into: Angiotensin-1 (Angiotensin 1-10) (Angiotensin I) (Ang I); Angiotensin-2 (Angiotensin 1-8) (Angiotensin II) (Ang II); Angiotensin-3 (Angiotensin 2-8) (Angiotensin III) (Ang III) (Des-Asp[1]-angiotensin II); Angiotensin-4 (Angiotensin 3-8) (Angiotensin IV) (Ang IV); Angiotensin 1-9; Angiotensin 1-7; Angiotensin 1-5; Angiotensin 1-4]	AGT SERPINA8	Homo sapiens (Human)	485
E9PGG2	ANHX_HUMAN	reviewed	Anomalous homeobox protein	ANHX	Homo sapiens (Human)	379
P16157	ANK1_HUMAN	reviewed	Ankyrin-1 (ANK-1) (Ankyrin-R) (Erythrocyte ankyrin)	ANK1 ANK	Homo sapiens (Human)	1881
Q01484	ANK2_HUMAN	reviewed	Ankyrin-2 (ANK-2) (Ankyrin-B) (Brain ankyrin) (Non-erythroid ankyrin)	ANK2	Homo sapiens (Human)	3957
Q12955	ANK3_HUMAN	reviewed	Ankyrin-3 (ANK-3) (Ankyrin-G)	ANK3	Homo sapiens (Human)	4377
Q7Z5J8	ANKAR_HUMAN	reviewed	Ankyrin and armadillo repeat-containing protein	ANKAR	Homo sapiens (Human)	1434
Q9NU02	ANKE1_HUMAN	reviewed	Ankyrin repeat and EF-hand domain-containing protein 1 (Ankyrin repeat domain-containing protein 5)	ANKEF1 ANKRD5	Homo sapiens (Human)	776
Q8N957	ANKF1_HUMAN	reviewed	Ankyrin repeat and fibronectin type-III domain-containing protein 1	ANKFN1	Homo sapiens (Human)	763
Q8IWZ3	ANKH1_HUMAN	reviewed	Ankyrin repeat and KH domain-containing protein 1 (HIV-1 Vpr-binding ankyrin repeat protein) (Multiple ankyrin repeats single KH domain) (hMASK)	ANKHD1 KIAA1085 MASK VBARP PP2500	Homo sapiens (Human)	2542
Q9HCJ1	ANKH_HUMAN	reviewed	Progressive ankylosis protein homolog (ANK)	ANKH KIAA1581 UNQ241/PRO274	Homo sapiens (Human)	492
Q8NFD2	ANKK1_HUMAN	reviewed	Ankyrin repeat and protein kinase domain-containing protein 1 (EC 2.7.11.1) (Protein kinase PKK2) (Sugen kinase 288) (SgK288) (X-kinase)	ANKK1 PKK2 SGK288	Homo sapiens (Human)	765
Q8NAG6	ANKL1_HUMAN	reviewed	Ankyrin repeat and LEM domain-containing protein 1 (Ankyrin repeat domain-containing protein 41) (LEM-domain containing protein 3)	ANKLE1 ANKRD41 LEM3	Homo sapiens (Human)	615
Q86XL3	ANKL2_HUMAN	reviewed	Ankyrin repeat and LEM domain-containing protein 2 (LEM domain-containing protein 4)	ANKLE2 KIAA0692 LEM4	Homo sapiens (Human)	938
Q15327	ANKR1_HUMAN	reviewed	Ankyrin repeat domain-containing protein 1 (Cardiac ankyrin repeat protein) (Cytokine-inducible gene C-193 protein) (Cytokine-inducible nuclear protein)	ANKRD1 C193 CARP HA1A2	Homo sapiens (Human)	319
Q9GZV1	ANKR2_HUMAN	reviewed	Ankyrin repeat domain-containing protein 2 (Skeletal muscle ankyrin repeat protein) (hArpp)	ANKRD2 ARPP	Homo sapiens (Human)	360
Q9Y2G4	ANKR6_HUMAN	reviewed	Ankyrin repeat domain-containing protein 6 (Diversin)	ANKRD6 KIAA0957	Homo sapiens (Human)	727
Q92527	ANKR7_HUMAN	reviewed	Ankyrin repeat domain-containing protein 7 (Testis-specific protein TSA806)	ANKRD7	Homo sapiens (Human)	254
Q96BM1	ANKR9_HUMAN	reviewed	Ankyrin repeat domain-containing protein 9	ANKRD9	Homo sapiens (Human)	317
Q6ZW76	ANKS3_HUMAN	reviewed	Ankyrin repeat and SAM domain-containing protein 3	ANKS3 KIAA1977	Homo sapiens (Human)	656
Q68DC2	ANKS6_HUMAN	reviewed	Ankyrin repeat and SAM domain-containing protein 6 (Ankyrin repeat domain-containing protein 14) (SamCystin) (Sterile alpha motif domain-containing protein 6) (SAM domain-containing protein 6)	ANKS6 ANKRD14 SAMD6	Homo sapiens (Human)	871
A6NFN9	ANKUB_HUMAN	reviewed	Protein ANKUB1 (Ankyrin repeat and ubiquitin domain-containing 1)	ANKUB1 C3orf16	Homo sapiens (Human)	424
Q9P2S6	ANKY1_HUMAN	reviewed	Ankyrin repeat and MYND domain-containing protein 1 (Testis-specific ankyrin-like protein 1) (Zinc finger MYND domain-containing protein 13)	ANKMY1 TSAL1 ZMYND13	Homo sapiens (Human)	941
Q8IV38	ANKY2_HUMAN	reviewed	Ankyrin repeat and MYND domain-containing protein 2	ANKMY2	Homo sapiens (Human)	441
Q9H8Y5	ANKZ1_HUMAN	reviewed	Ankyrin repeat and zinc finger domain-containing protein 1 (Zinc finger protein 744)	ANKZF1 ZNF744	Homo sapiens (Human)	726
Q9NQW6	ANLN_HUMAN	reviewed	Actin-binding protein anillin	ANLN	Homo sapiens (Human)	1124
Q6P2P2	ANM10_HUMAN	reviewed	Putative protein arginine N-methyltransferase 10 (EC 2.1.1.-)	PRMT10	Homo sapiens (Human)	845
Q99873	ANM1_HUMAN	reviewed	Protein arginine N-methyltransferase 1 (EC 2.1.1.-) (Histone-arginine N-methyltransferase PRMT1) (EC 2.1.1.125) (Interferon receptor 1-bound protein 4)	PRMT1 HMT2 HRMT1L2 IR1B4	Homo sapiens (Human)	361
P55345	ANM2_HUMAN	reviewed	Protein arginine N-methyltransferase 2 (EC 2.1.1.-) (Histone-arginine N-methyltransferase PRMT2) (EC 2.1.1.125)	PRMT2 HMT1 HRMT1L1	Homo sapiens (Human)	433
O60678	ANM3_HUMAN	reviewed	Protein arginine N-methyltransferase 3 (EC 2.1.1.-) (Heterogeneous nuclear ribonucleoprotein methyltransferase-like protein 3)	PRMT3 HRMT1L3	Homo sapiens (Human)	531
O14744	ANM5_HUMAN	reviewed	Protein arginine N-methyltransferase 5 (EC 2.1.1.-) (72 kDa ICln-binding protein) (Histone-arginine N-methyltransferase PRMT5) (EC 2.1.1.125) (Jak-binding protein 1) (Shk1 kinase-binding protein 1 homolog) (SKB1 homolog) (SKB1Hs) [Cleaved into: Protein arginine N-methyltransferase 5, N-terminally processed]	PRMT5 HRMT1L5 IBP72 JBP1 SKB1	Homo sapiens (Human)	637
Q96LA8	ANM6_HUMAN	reviewed	Protein arginine N-methyltransferase 6 (EC 2.1.1.-) (Heterogeneous nuclear ribonucleoprotein methyltransferase-like protein 6) (Histone-arginine N-methyltransferase PRMT6) (EC 2.1.1.125)	PRMT6 HRMT1L6	Homo sapiens (Human)	375
Q9NVM4	ANM7_HUMAN	reviewed	Protein arginine N-methyltransferase 7 (EC 2.1.1.-) (Histone-arginine N-methyltransferase PRMT7) (EC 2.1.1.125) ([Myelin basic protein]-arginine N-methyltransferase PRMT7) (EC 2.1.1.126)	PRMT7 KIAA1933	Homo sapiens (Human)	692
Q9NR22	ANM8_HUMAN	reviewed	Protein arginine N-methyltransferase 8 (EC 2.1.1.-) (Heterogeneous nuclear ribonucleoprotein methyltransferase-like protein 4)	PRMT8 HRMT1L3 HRMT1L4	Homo sapiens (Human)	394
Q9NW15	ANO10_HUMAN	reviewed	Anoctamin-10 (Transmembrane protein 16K)	ANO10 TMEM16K	Homo sapiens (Human)	660
Q5XXA6	ANO1_HUMAN	reviewed	Anoctamin-1 (Discovered on gastrointestinal stromal tumors protein 1) (Oral cancer overexpressed protein 2) (Transmembrane protein 16A) (Tumor-amplified and overexpressed sequence 2)	ANO1 DOG1 ORAOV2 TAOS2 TMEM16A	Homo sapiens (Human)	986
Q9NQ90	ANO2_HUMAN	reviewed	Anoctamin-2 (Transmembrane protein 16B)	ANO2 C12orf3 TMEM16B	Homo sapiens (Human)	1003
Q9BYT9	ANO3_HUMAN	reviewed	Anoctamin-3 (Transmembrane protein 16C)	ANO3 C11orf25 TMEM16C GENX-3947	Homo sapiens (Human)	981
Q32M45	ANO4_HUMAN	reviewed	Anoctamin-4 (Transmembrane protein 16D)	ANO4 TMEM16D	Homo sapiens (Human)	955
Q75V66	ANO5_HUMAN	reviewed	Anoctamin-5 (Gnathodiaphyseal dysplasia 1 protein) (Transmembrane protein 16E)	ANO5 GDD1 TMEM16E	Homo sapiens (Human)	913
Q4KMQ2	ANO6_HUMAN	reviewed	Anoctamin-6 (Small-conductance calcium-activated nonselective cation channel) (SCAN channel) (Transmembrane protein 16F)	ANO6 TMEM16F	Homo sapiens (Human)	910
Q6IWH7	ANO7_HUMAN	reviewed	Anoctamin-7 (Dresden transmembrane protein of the prostate) (D-TMPP) (IPCA-5) (New gene expressed in prostate) (Prostate cancer-associated protein 5) (Transmembrane protein 16G)	ANO7 NGEP PCANAP5 TMEM16G	Homo sapiens (Human)	933
Q9HCE9	ANO8_HUMAN	reviewed	Anoctamin-8 (Transmembrane protein 16H)	ANO8 KIAA1623 TMEM16H	Homo sapiens (Human)	1232
A1A5B4	ANO9_HUMAN	reviewed	Anoctamin-9 (Transmembrane protein 16J) (Tumor protein p53-inducible protein 5) (p53-induced gene 5 protein)	ANO9 PIG5 TMEM16J TP53I5	Homo sapiens (Human)	782
P16066	ANPRA_HUMAN	reviewed	Atrial natriuretic peptide receptor 1 (EC 4.6.1.2) (Atrial natriuretic peptide receptor type A) (ANP-A) (ANPR-A) (NPR-A) (Guanylate cyclase A) (GC-A)	NPR1 ANPRA	Homo sapiens (Human)	1061
P20594	ANPRB_HUMAN	reviewed	Atrial natriuretic peptide receptor 2 (EC 4.6.1.2) (Atrial natriuretic peptide receptor type B) (ANP-B) (ANPR-B) (NPR-B) (Guanylate cyclase B) (GC-B)	NPR2 ANPRB	Homo sapiens (Human)	1047
P17342	ANPRC_HUMAN	reviewed	Atrial natriuretic peptide receptor 3 (Atrial natriuretic peptide clearance receptor) (Atrial natriuretic peptide receptor type C) (ANP-C) (ANPR-C) (NPR-C)	NPR3 ANPRC C5orf23 NPRC	Homo sapiens (Human)	541
Q9NXR5	ANR10_HUMAN	reviewed	Ankyrin repeat domain-containing protein 10	ANKRD10	Homo sapiens (Human)	420
Q6UB99	ANR11_HUMAN	reviewed	Ankyrin repeat domain-containing protein 11 (Ankyrin repeat-containing cofactor 1)	ANKRD11 ANCO1	Homo sapiens (Human)	2663
Q6UB98	ANR12_HUMAN	reviewed	Ankyrin repeat domain-containing protein 12 (Ankyrin repeat-containing cofactor 2) (GAC-1 protein)	ANKRD12 ANCO2 KIAA0874	Homo sapiens (Human)	2062
Q6P6B7	ANR16_HUMAN	reviewed	Ankyrin repeat domain-containing protein 16	ANKRD16	Homo sapiens (Human)	361
O75179	ANR17_HUMAN	reviewed	Ankyrin repeat domain-containing protein 17 (Gene trap ankyrin repeat protein) (Serologically defined breast cancer antigen NY-BR-16)	ANKRD17 GTAR KIAA0697	Homo sapiens (Human)	2603
Q9H560	ANR19_HUMAN	reviewed	Putative ankyrin repeat domain-containing protein 19 (Ankyrin repeat domain-containing protein 19 pseudogene)	ANKRD19P ANKRD19	Homo sapiens (Human)	264
Q5VYY1	ANR22_HUMAN	reviewed	Ankyrin repeat domain-containing protein 22	ANKRD22	Homo sapiens (Human)	191
Q86SG2	ANR23_HUMAN	reviewed	Ankyrin repeat domain-containing protein 23 (Diabetes-related ankyrin repeat protein) (Muscle ankyrin repeat protein 3)	ANKRD23 DARP	Homo sapiens (Human)	305
Q8TF21	ANR24_HUMAN	reviewed	Ankyrin repeat domain-containing protein 24	ANKRD24 KIAA1981	Homo sapiens (Human)	1146
Q9UPS8	ANR26_HUMAN	reviewed	Ankyrin repeat domain-containing protein 26	ANKRD26 KIAA1074	Homo sapiens (Human)	1709
Q96NW4	ANR27_HUMAN	reviewed	Ankyrin repeat domain-containing protein 27 (VPS9 domain-containing protein)	ANKRD27 PP12899	Homo sapiens (Human)	1050
O15084	ANR28_HUMAN	reviewed	Serine/threonine-protein phosphatase 6 regulatory ankyrin repeat subunit A (PP6-ARS-A) (Serine/threonine-protein phosphatase 6 regulatory subunit ARS-A) (Ankyrin repeat domain-containing protein 28) (Phosphatase interactor targeting protein hnRNP K) (PITK)	ANKRD28 KIAA0379	Homo sapiens (Human)	1053
Q8N6D5	ANR29_HUMAN	reviewed	Ankyrin repeat domain-containing protein 29	ANKRD29	Homo sapiens (Human)	301
Q8N7Z5	ANR31_HUMAN	reviewed	Putative ankyrin repeat domain-containing protein 31	ANKRD31	Homo sapiens (Human)	1873
Q9BQI6	ANR32_HUMAN	reviewed	Ankyrin repeat domain-containing protein 32 (BRCT domain-containing protein 1)	ANKRD32 BRCTD1	Homo sapiens (Human)	1058
Q7Z3H0	ANR33_HUMAN	reviewed	Ankyrin repeat domain-containing protein 33	ANKRD33 C12orf7	Homo sapiens (Human)	272
Q8N283	ANR35_HUMAN	reviewed	Ankyrin repeat domain-containing protein 35	ANKRD35	Homo sapiens (Human)	1001
Q7Z713	ANR37_HUMAN	reviewed	Ankyrin repeat domain-containing protein 37 (Low-density lipoprotein receptor-related protein 2-binding protein) (hLrp2bp)	ANKRD37 LPR2BP	Homo sapiens (Human)	158
Q53RE8	ANR39_HUMAN	reviewed	Ankyrin repeat domain-containing protein 39	ANKRD39 HSPC200	Homo sapiens (Human)	183
Q6AI12	ANR40_HUMAN	reviewed	Ankyrin repeat domain-containing protein 40	ANKRD40	Homo sapiens (Human)	368
Q8N9B4	ANR42_HUMAN	reviewed	Ankyrin repeat domain-containing protein 42	ANKRD42	Homo sapiens (Human)	389
Q8N8A2	ANR44_HUMAN	reviewed	Serine/threonine-protein phosphatase 6 regulatory ankyrin repeat subunit B (PP6-ARS-B) (Serine/threonine-protein phosphatase 6 regulatory subunit ARS-B) (Ankyrin repeat domain-containing protein 44)	ANKRD44	Homo sapiens (Human)	993
Q5TZF3	ANR45_HUMAN	reviewed	Ankyrin repeat domain-containing protein 45	ANKRD45	Homo sapiens (Human)	282
Q86W74	ANR46_HUMAN	reviewed	Ankyrin repeat domain-containing protein 46 (Ankyrin repeat small protein) (ANK-S)	ANKRD46	Homo sapiens (Human)	232
Q8WVL7	ANR49_HUMAN	reviewed	Ankyrin repeat domain-containing protein 49 (Fetal globin-inducing factor)	ANKRD49 FGIF	Homo sapiens (Human)	239
Q9ULJ7	ANR50_HUMAN	reviewed	Ankyrin repeat domain-containing protein 50	ANKRD50 KIAA1223	Homo sapiens (Human)	1429
Q8NB46	ANR52_HUMAN	reviewed	Serine/threonine-protein phosphatase 6 regulatory ankyrin repeat subunit C (PP6-ARS-C) (Serine/threonine-protein phosphatase 6 regulatory subunit ARS-C) (Ankyrin repeat domain-containing protein 52)	ANKRD52	Homo sapiens (Human)	1076
Q8N9V6	ANR53_HUMAN	reviewed	Ankyrin repeat domain-containing protein 53	ANKRD53	Homo sapiens (Human)	530
Q6NXT1	ANR54_HUMAN	reviewed	Ankyrin repeat domain-containing protein 54 (Lyn-interacting ankyrin repeat protein)	ANKRD54 LIAR	Homo sapiens (Human)	300
Q3KP44	ANR55_HUMAN	reviewed	Ankyrin repeat domain-containing protein 55	ANKRD55	Homo sapiens (Human)	614
Q9BZ19	ANR60_HUMAN	reviewed	Ankyrin repeat domain-containing protein 60	ANKRD60 C20orf86	Homo sapiens (Human)	345
A6NGH8	ANR61_HUMAN	reviewed	Ankyrin repeat domain-containing protein 61	ANKRD61	Homo sapiens (Human)	418
A6NC57	ANR62_HUMAN	reviewed	Ankyrin repeat domain-containing protein 62	ANKRD62	Homo sapiens (Human)	917
C9JTQ0	ANR63_HUMAN	reviewed	Ankyrin repeat domain-containing protein 63	ANKRD63	Homo sapiens (Human)	380
E5RJM6	ANR65_HUMAN	reviewed	Ankyrin repeat domain-containing protein 65	ANKRD65	Homo sapiens (Human)	399
B4E2M5	ANR66_HUMAN	reviewed	Ankyrin repeat domain-containing protein 66	ANKRD66	Homo sapiens (Human)	251
Q9H9E1	ANRA2_HUMAN	reviewed	Ankyrin repeat family A protein 2 (RFXANK-like protein 2)	ANKRA2 ANKRA	Homo sapiens (Human)	313
P61109	ANRE_HUMAN	reviewed	Kidney androgen-regulated protein (ARP) (KAP)	KAP FKSG22	Homo sapiens (Human)	121
Q92625	ANS1A_HUMAN	reviewed	Ankyrin repeat and SAM domain-containing protein 1A (Odin)	ANKS1A ANKS1 KIAA0229 ODIN	Homo sapiens (Human)	1134
Q7Z6G8	ANS1B_HUMAN	reviewed	Ankyrin repeat and sterile alpha motif domain-containing protein 1B (Amyloid-beta protein intracellular domain-associated protein 1) (AIDA-1) (E2A-PBX1-associated protein) (EB-1)	ANKS1B	Homo sapiens (Human)	1248
Q8N8V4	ANS4B_HUMAN	reviewed	Ankyrin repeat and SAM domain-containing protein 4B (Harmonin-interacting ankyrin repeat-containing protein) (Harp)	ANKS4B HARP	Homo sapiens (Human)	417
P01008	ANT3_HUMAN	reviewed	Antithrombin-III (ATIII) (Serpin C1)	SERPINC1 AT3 PRO0309	Homo sapiens (Human)	464
Q9H6X2	ANTR1_HUMAN	reviewed	Anthrax toxin receptor 1 (Tumor endothelial marker 8)	ANTXR1 ATR TEM8	Homo sapiens (Human)	564
P58335	ANTR2_HUMAN	reviewed	Anthrax toxin receptor 2 (Capillary morphogenesis gene 2 protein) (CMG-2)	ANTXR2 CMG2	Homo sapiens (Human)	489
A6NF34	ANTRL_HUMAN	reviewed	Anthrax toxin receptor-like	ANTXRL	Homo sapiens (Human)	565
Q9UJ72	ANX10_HUMAN	reviewed	Annexin A10 (Annexin-10) (Annexin-14)	ANXA10 ANX14	Homo sapiens (Human)	324
P50995	ANX11_HUMAN	reviewed	Annexin A11 (56 kDa autoantigen) (Annexin XI) (Annexin-11) (Calcyclin-associated annexin 50) (CAP-50)	ANXA11 ANX11	Homo sapiens (Human)	505
P27216	ANX13_HUMAN	reviewed	Annexin A13 (Annexin XIII) (Annexin-13) (Intestine-specific annexin) (ISA)	ANXA13 ANX13	Homo sapiens (Human)	316
P04083	ANXA1_HUMAN	reviewed	Annexin A1 (Annexin I) (Annexin-1) (Calpactin II) (Calpactin-2) (Chromobindin-9) (Lipocortin I) (Phospholipase A2 inhibitory protein) (p35)	ANXA1 ANX1 LPC1	Homo sapiens (Human)	346
P07355	ANXA2_HUMAN	reviewed	Annexin A2 (Annexin II) (Annexin-2) (Calpactin I heavy chain) (Calpactin-1 heavy chain) (Chromobindin-8) (Lipocortin II) (Placental anticoagulant protein IV) (PAP-IV) (Protein I) (p36)	ANXA2 ANX2 ANX2L4 CAL1H LPC2D	Homo sapiens (Human)	339
P12429	ANXA3_HUMAN	reviewed	Annexin A3 (35-alpha calcimedin) (Annexin III) (Annexin-3) (Inositol 1,2-cyclic phosphate 2-phosphohydrolase) (Lipocortin III) (Placental anticoagulant protein III) (PAP-III)	ANXA3 ANX3	Homo sapiens (Human)	323
P09525	ANXA4_HUMAN	reviewed	Annexin A4 (35-beta calcimedin) (Annexin IV) (Annexin-4) (Carbohydrate-binding protein p33/p41) (Chromobindin-4) (Endonexin I) (Lipocortin IV) (P32.5) (PP4-X) (Placental anticoagulant protein II) (PAP-II) (Protein II)	ANXA4 ANX4	Homo sapiens (Human)	319
P08758	ANXA5_HUMAN	reviewed	Annexin A5 (Anchorin CII) (Annexin V) (Annexin-5) (Calphobindin I) (CBP-I) (Endonexin II) (Lipocortin V) (Placental anticoagulant protein 4) (PP4) (Placental anticoagulant protein I) (PAP-I) (Thromboplastin inhibitor) (Vascular anticoagulant-alpha) (VAC-alpha)	ANXA5 ANX5 ENX2 PP4	Homo sapiens (Human)	320
P08133	ANXA6_HUMAN	reviewed	Annexin A6 (67 kDa calelectrin) (Annexin VI) (Annexin-6) (Calphobindin-II) (CPB-II) (Chromobindin-20) (Lipocortin VI) (Protein III) (p68) (p70)	ANXA6 ANX6	Homo sapiens (Human)	673
P20073	ANXA7_HUMAN	reviewed	Annexin A7 (Annexin VII) (Annexin-7) (Synexin)	ANXA7 ANX7 SNX OK/SW-cl.95	Homo sapiens (Human)	488
P13928	ANXA8_HUMAN	reviewed	Annexin A8 (Annexin VIII) (Annexin-8) (Vascular anticoagulant-beta) (VAC-beta)	ANXA8 ANX8	Homo sapiens (Human)	327
O76027	ANXA9_HUMAN	reviewed	Annexin A9 (Annexin XXXI) (Annexin-31) (Annexin-9) (Pemphaxin)	ANXA9 ANX31	Homo sapiens (Human)	345
P28039	AOAH_HUMAN	reviewed	Acyloxyacyl hydrolase (EC 3.1.1.77) [Cleaved into: Acyloxyacyl hydrolase small subunit; Acyloxyacyl hydrolase large subunit]	AOAH	Homo sapiens (Human)	575
O75106	AOC2_HUMAN	reviewed	Retina-specific copper amine oxidase (RAO) (EC 1.4.3.21) (Amine oxidase [copper-containing]) (Semicarbazide-sensitive amine oxidase) (SSAO)	AOC2	Homo sapiens (Human)	756
Q16853	AOC3_HUMAN	reviewed	Membrane primary amine oxidase (EC 1.4.3.21) (Copper amine oxidase) (HPAO) (Semicarbazide-sensitive amine oxidase) (SSAO) (Vascular adhesion protein 1) (VAP-1)	AOC3 VAP1	Homo sapiens (Human)	763
P21397	AOFA_HUMAN	reviewed	Amine oxidase [flavin-containing] A (EC 1.4.3.4) (Monoamine oxidase type A) (MAO-A)	MAOA	Homo sapiens (Human)	527
P27338	AOFB_HUMAN	reviewed	Amine oxidase [flavin-containing] B (EC 1.4.3.4) (Monoamine oxidase type B) (MAO-B)	MAOB	Homo sapiens (Human)	520
O60641	AP180_HUMAN	reviewed	Clathrin coat assembly protein AP180 (91 kDa synaptosomal-associated protein) (Clathrin coat-associated protein AP180) (Phosphoprotein F1-20)	SNAP91 KIAA0656	Homo sapiens (Human)	907
Q63HQ0	AP1AR_HUMAN	reviewed	AP-1 complex-associated regulatory protein (2c18) (Adapter-related protein complex 1-associated regulatory protein) (Gamma-1-adaptin brefeldin A resistance protein) (GBAR) (Gamma-BAR)	AP1AR C4orf16 PRO0971	Homo sapiens (Human)	302
Q10567	AP1B1_HUMAN	reviewed	AP-1 complex subunit beta-1 (Adapter-related protein complex 1 subunit beta-1) (Adaptor protein complex AP-1 subunit beta-1) (Beta-1-adaptin) (Beta-adaptin 1) (Clathrin assembly protein complex 1 beta large chain) (Golgi adaptor HA1/AP1 adaptin beta subunit)	AP1B1 ADTB1 BAM22 CLAPB2	Homo sapiens (Human)	949
O43747	AP1G1_HUMAN	reviewed	AP-1 complex subunit gamma-1 (Adapter-related protein complex 1 subunit gamma-1) (Adaptor protein complex AP-1 subunit gamma-1) (Clathrin assembly protein complex 1 gamma-1 large chain) (Gamma1-adaptin) (Golgi adaptor HA1/AP1 adaptin subunit gamma-1)	AP1G1 ADTG CLAPG1	Homo sapiens (Human)	822
O75843	AP1G2_HUMAN	reviewed	AP-1 complex subunit gamma-like 2 (Gamma2-adaptin) (G2ad)	AP1G2	Homo sapiens (Human)	785
Q9BXS5	AP1M1_HUMAN	reviewed	AP-1 complex subunit mu-1 (AP-mu chain family member mu1A) (Adaptor protein complex AP-1 mu-1 subunit) (Adaptor-related protein complex 1 mu-1 subunit) (Clathrin assembly protein complex 1 medium chain 1) (Clathrin coat assembly protein AP47) (Clathrin coat-associated protein AP47) (Golgi adaptor HA1/AP1 adaptin mu-1 subunit) (Mu-adaptin 1) (Mu1A-adaptin)	AP1M1 CLTNM	Homo sapiens (Human)	423
Q9Y6Q5	AP1M2_HUMAN	reviewed	AP-1 complex subunit mu-2 (AP-mu chain family member mu1B) (Adaptor protein complex AP-1 mu-2 subunit) (Adaptor-related protein complex 1 mu-2 subunit) (Clathrin assembly protein complex 1 medium chain 2) (Golgi adaptor HA1/AP1 adaptin mu-2 subunit) (Mu-adaptin 2) (Mu1B-adaptin)	AP1M2	Homo sapiens (Human)	423
P61966	AP1S1_HUMAN	reviewed	AP-1 complex subunit sigma-1A (Adapter-related protein complex 1 sigma-1A subunit) (Adaptor protein complex AP-1 sigma-1A subunit) (Clathrin assembly protein complex 1 sigma-1A small chain) (Clathrin coat assembly protein AP19) (Golgi adaptor HA1/AP1 adaptin sigma-1A subunit) (HA1 19 kDa subunit) (Sigma 1a subunit of AP-1 clathrin) (Sigma-adaptin 1A) (Sigma1A-adaptin)	AP1S1 AP19 CLAPS1	Homo sapiens (Human)	158
P56377	AP1S2_HUMAN	reviewed	AP-1 complex subunit sigma-2 (Adapter-related protein complex 1 sigma-1B subunit) (Adaptor protein complex AP-1 sigma-1B subunit) (Clathrin assembly protein complex 1 sigma-1B small chain) (Golgi adaptor HA1/AP1 adaptin sigma-1B subunit) (Sigma 1B subunit of AP-1 clathrin) (Sigma-adaptin 1B) (Sigma1B-adaptin)	AP1S2 DC22	Homo sapiens (Human)	157
Q96PC3	AP1S3_HUMAN	reviewed	AP-1 complex subunit sigma-3 (Adapter-related protein complex 1 sigma-1C subunit) (Adaptor protein complex AP-1 sigma-1C subunit) (Clathrin assembly protein complex 1 sigma-1C small chain) (Golgi adaptor HA1/AP1 adaptin sigma-1C subunit) (Sigma 1C subunit of AP-1 clathrin) (Sigma-adaptin 1C) (Sigma1C-adaptin)	AP1S3	Homo sapiens (Human)	154
O95782	AP2A1_HUMAN	reviewed	AP-2 complex subunit alpha-1 (100 kDa coated vesicle protein A) (Adapter-related protein complex 2 alpha-1 subunit) (Adaptor protein complex AP-2 subunit alpha-1) (Alpha-adaptin A) (Alpha1-adaptin) (Clathrin assembly protein complex 2 alpha-A large chain) (Plasma membrane adaptor HA2/AP2 adaptin alpha A subunit)	AP2A1 ADTAA CLAPA1	Homo sapiens (Human)	977
O94973	AP2A2_HUMAN	reviewed	AP-2 complex subunit alpha-2 (100 kDa coated vesicle protein C) (Adapter-related protein complex 2 alpha-2 subunit) (Adaptor protein complex AP-2 subunit alpha-2) (Alpha-adaptin C) (Alpha2-adaptin) (Clathrin assembly protein complex 2 alpha-C large chain) (Huntingtin yeast partner J) (Huntingtin-interacting protein 9) (HIP-9) (Huntingtin-interacting protein J) (Plasma membrane adaptor HA2/AP2 ada…	AP2A2 ADTAB CLAPA2 HIP9 HYPJ KIAA0899	Homo sapiens (Human)	939
P05549	AP2A_HUMAN	reviewed	Transcription factor AP-2-alpha (AP2-alpha) (AP-2 transcription factor) (Activating enhancer-binding protein 2-alpha) (Activator protein 2) (AP-2)	TFAP2A AP2TF TFAP2	Homo sapiens (Human)	437
P63010	AP2B1_HUMAN	reviewed	AP-2 complex subunit beta (AP105B) (Adapter-related protein complex 2 beta subunit) (Adaptor protein complex AP-2 subunit beta) (Beta-2-adaptin) (Beta-adaptin) (Clathrin assembly protein complex 2 beta large chain) (Plasma membrane adaptor HA2/AP2 adaptin beta subunit)	AP2B1 ADTB2 CLAPB1	Homo sapiens (Human)	937
Q92481	AP2B_HUMAN	reviewed	Transcription factor AP-2-beta (AP2-beta) (Activating enhancer-binding protein 2-beta)	TFAP2B	Homo sapiens (Human)	460
Q92754	AP2C_HUMAN	reviewed	Transcription factor AP-2 gamma (AP2-gamma) (Activating enhancer-binding protein 2 gamma) (Transcription factor ERF-1)	TFAP2C	Homo sapiens (Human)	450
Q7Z6R9	AP2D_HUMAN	reviewed	Transcription factor AP-2-delta (AP2-delta) (Activating enhancer-binding protein 2-delta) (Transcription factor AP-2-beta-like 1)	TFAP2D TFAP2BL1	Homo sapiens (Human)	452
Q6VUC0	AP2E_HUMAN	reviewed	Transcription factor AP-2-epsilon (AP2-epsilon) (Activating enhancer-binding protein 2-epsilon)	TFAP2E	Homo sapiens (Human)	442
Q96CW1	AP2M1_HUMAN	reviewed	AP-2 complex subunit mu (AP-2 mu chain) (Adapter-related protein complex 2 mu subunit) (Adaptin-mu2) (Adaptor protein complex AP-2 subunit mu) (Clathrin assembly protein complex 2 medium chain) (Clathrin coat assembly protein AP50) (Clathrin coat-associated protein AP50) (HA2 50 kDa subunit) (Plasma membrane adaptor AP-2 50 kDa protein)	AP2M1 CLAPM1 KIAA0109	Homo sapiens (Human)	435
P53680	AP2S1_HUMAN	reviewed	AP-2 complex subunit sigma (Adapter-related protein complex 2 sigma subunit) (Adaptor protein complex AP-2 subunit sigma) (Clathrin assembly protein 2 small chain) (Clathrin coat assembly protein AP17) (Clathrin coat-associated protein AP17) (HA2 17 kDa subunit) (Plasma membrane adaptor AP-2 17 kDa protein) (Sigma2-adaptin)	AP2S1 AP17 CLAPS2	Homo sapiens (Human)	142
O00203	AP3B1_HUMAN	reviewed	AP-3 complex subunit beta-1 (Adapter-related protein complex 3 subunit beta-1) (Adaptor protein complex AP-3 subunit beta-1) (Beta-3A-adaptin) (Clathrin assembly protein complex 3 beta-1 large chain)	AP3B1 ADTB3A	Homo sapiens (Human)	1094
Q13367	AP3B2_HUMAN	reviewed	AP-3 complex subunit beta-2 (Adapter-related protein complex 3 subunit beta-2) (Adaptor protein complex AP-3 subunit beta-2) (Beta-3B-adaptin) (Clathrin assembly protein complex 3 beta-2 large chain) (Neuron-specific vesicle coat protein beta-NAP)	AP3B2	Homo sapiens (Human)	1082
O14617	AP3D1_HUMAN	reviewed	AP-3 complex subunit delta-1 (AP-3 complex subunit delta) (Adapter-related protein complex 3 subunit delta-1) (Delta-adaptin)	AP3D1 PRO0039	Homo sapiens (Human)	1153
Q9Y2T2	AP3M1_HUMAN	reviewed	AP-3 complex subunit mu-1 (AP-3 adapter complex mu3A subunit) (Adapter-related protein complex 3 mu-1 subunit) (Mu-adaptin 3A) (Mu3A-adaptin)	AP3M1	Homo sapiens (Human)	418
P53677	AP3M2_HUMAN	reviewed	AP-3 complex subunit mu-2 (Adapter-related protein complex 3 mu-2 subunit) (Clathrin assembly protein assembly protein complex 1 medium chain homolog 2) (Clathrin coat assembly protein AP47 homolog 2) (Clathrin coat-associated protein AP47 homolog 2) (Golgi adaptor AP-1 47 kDa protein homolog 2) (HA1 47 kDa subunit homolog 2) (Mu3B-adaptin) (P47B)	AP3M2	Homo sapiens (Human)	418
Q92572	AP3S1_HUMAN	reviewed	AP-3 complex subunit sigma-1 (AP-3 complex subunit sigma-3A) (Adapter-related protein complex 3 sigma-1 subunit) (Clathrin-associated/assembly/adapter protein, small 3) (Sigma-3A-adaptin) (Sigma3A-adaptin) (Sigma-adaptin 3a)	AP3S1 CLAPS3	Homo sapiens (Human)	193
P59780	AP3S2_HUMAN	reviewed	AP-3 complex subunit sigma-2 (AP-3 complex subunit sigma-3B) (Adapter-related protein complex 3 sigma-2 subunit) (Sigma-3B-adaptin) (Sigma3B-adaptin) (Sigma-adaptin 3b)	AP3S2	Homo sapiens (Human)	193
Q96N21	AP4AT_HUMAN	reviewed	AP-4 complex accessory subunit tepsin (ENTH domain-containing protein 2) (Epsin for AP-4) (Tetra-epsin)	ENTHD2 C17orf56	Homo sapiens (Human)	525
P50583	AP4A_HUMAN	reviewed	Bis(5'-nucleosyl)-tetraphosphatase [asymmetrical] (EC 3.6.1.17) (Diadenosine 5',5'''-P1,P4-tetraphosphate asymmetrical hydrolase) (Ap4A hydrolase) (Ap4Aase) (Diadenosine tetraphosphatase) (Nucleoside diphosphate-linked moiety X motif 2) (Nudix motif 2)	NUDT2 APAH1	Homo sapiens (Human)	147
Q9Y6B7	AP4B1_HUMAN	reviewed	AP-4 complex subunit beta-1 (AP-4 adapter complex subunit beta) (Adapter-related protein complex 4 subunit beta-1) (Beta subunit of AP-4) (Beta4-adaptin)	AP4B1	Homo sapiens (Human)	739
Q9UPM8	AP4E1_HUMAN	reviewed	AP-4 complex subunit epsilon-1 (AP-4 adapter complex subunit epsilon) (Adapter-related protein complex 4 subunit epsilon-1) (Epsilon subunit of AP-4) (Epsilon-adaptin)	AP4E1	Homo sapiens (Human)	1137
O00189	AP4M1_HUMAN	reviewed	AP-4 complex subunit mu-1 (AP-4 adapter complex mu subunit) (Adapter-related protein complex 4 mu-1 subunit) (Mu subunit of AP-4) (Mu-adaptin-related protein 2) (mu-ARP2) (Mu4-adaptin) (mu4)	AP4M1 MUARP2	Homo sapiens (Human)	453
Q9Y587	AP4S1_HUMAN	reviewed	AP-4 complex subunit sigma-1 (AP-4 adapter complex subunit sigma-1) (Adapter-related protein complex 4 subunit sigma-1) (Sigma-1 subunit of AP-4) (Sigma-4-adaptin) (Sigma4-adaptin)	AP4S1	Homo sapiens (Human)	144
Q2VPB7	AP5B1_HUMAN	reviewed	AP-5 complex subunit beta-1 (Adapter-related protein complex 5 beta subunit) (Beta5)	AP5B1 PP1030	Homo sapiens (Human)	878
Q9H0R1	AP5M1_HUMAN	reviewed	AP-5 complex subunit mu-1 (Adapter-related protein complex 5 mu subunit) (Mu5) (Mu-2-related death-inducing protein) (MuD) (Putative HIV-1 infection-related protein)	AP5M1 C14orf108 MUDENG	Homo sapiens (Human)	490
Q9NUS5	AP5S1_HUMAN	reviewed	AP-5 complex subunit sigma-1 (Adapter-related protein complex 5 sigma subunit) (Sigma5)	AP5S1 C20orf29	Homo sapiens (Human)	200
O43299	AP5Z1_HUMAN	reviewed	AP-5 complex subunit zeta-1 (Adapter-related protein complex 5 zeta subunit) (Zeta5)	AP5Z1 KIAA0415 SPG48	Homo sapiens (Human)	807
O14727	APAF_HUMAN	reviewed	Apoptotic protease-activating factor 1 (APAF-1)	APAF1 KIAA0413	Homo sapiens (Human)	1248
Q02410	APBA1_HUMAN	reviewed	Amyloid beta A4 precursor protein-binding family A member 1 (Adapter protein X11alpha) (Neuron-specific X11 protein) (Neuronal Munc18-1-interacting protein 1) (Mint-1)	APBA1 MINT1 X11	Homo sapiens (Human)	837
Q99767	APBA2_HUMAN	reviewed	Amyloid beta A4 precursor protein-binding family A member 2 (Adapter protein X11beta) (Neuron-specific X11L protein) (Neuronal Munc18-1-interacting protein 2) (Mint-2)	APBA2 MINT2 X11L	Homo sapiens (Human)	749
O96018	APBA3_HUMAN	reviewed	Amyloid beta A4 precursor protein-binding family A member 3 (Adapter protein X11gamma) (Neuron-specific X11L2 protein) (Neuronal Munc18-1-interacting protein 3) (Mint-3)	APBA3 MINT3 X11L2	Homo sapiens (Human)	575
O00213	APBB1_HUMAN	reviewed	Amyloid beta A4 precursor protein-binding family B member 1 (Protein Fe65)	APBB1 FE65 RIR	Homo sapiens (Human)	710
Q92870	APBB2_HUMAN	reviewed	Amyloid beta A4 precursor protein-binding family B member 2 (Protein Fe65-like 1)	APBB2 FE65L FE65L1	Homo sapiens (Human)	758
O95704	APBB3_HUMAN	reviewed	Amyloid beta A4 precursor protein-binding family B member 3 (Protein Fe65-like 2) (Fe65L2)	APBB3 FE65L2	Homo sapiens (Human)	486
Q92624	APBP2_HUMAN	reviewed	Amyloid protein-binding protein 2 (Amyloid beta precursor protein-binding protein 2) (APP-BP2) (Protein interacting with APP tail 1)	APPBP2 KIAA0228 PAT1	Homo sapiens (Human)	585
Q9UM13	APC10_HUMAN	reviewed	Anaphase-promoting complex subunit 10 (APC10) (Cyclosome subunit 10)	ANAPC10 APC10	Homo sapiens (Human)	185
Q9NYG5	APC11_HUMAN	reviewed	Anaphase-promoting complex subunit 11 (APC11) (Cyclosome subunit 11) (Hepatocellular carcinoma-associated RING finger protein)	ANAPC11 HSPC214	Homo sapiens (Human)	84
Q9BS18	APC13_HUMAN	reviewed	Anaphase-promoting complex subunit 13 (APC13) (Cyclosome subunit 13)	ANAPC13	Homo sapiens (Human)	74
P60006	APC15_HUMAN	reviewed	Anaphase-promoting complex subunit 15 (APC15)	ANAPC15 C11orf51 HSPC020	Homo sapiens (Human)	121
Q96DE5	APC16_HUMAN	reviewed	Anaphase-promoting complex subunit 16 (APC16) (Cyclosome subunit 16)	ANAPC16 C10orf104	Homo sapiens (Human)	110
Q9H1A4	APC1_HUMAN	reviewed	Anaphase-promoting complex subunit 1 (APC1) (Cyclosome subunit 1) (Mitotic checkpoint regulator) (Testis-specific gene 24 protein)	ANAPC1 TSG24	Homo sapiens (Human)	1944
O95996	APC2_HUMAN	reviewed	Adenomatous polyposis coli protein 2 (Adenomatous polyposis coli protein-like) (APC-like)	APC2 APCL	Homo sapiens (Human)	2303
Q9UJX5	APC4_HUMAN	reviewed	Anaphase-promoting complex subunit 4 (APC4) (Cyclosome subunit 4)	ANAPC4 APC4	Homo sapiens (Human)	808
Q9UJX4	APC5_HUMAN	reviewed	Anaphase-promoting complex subunit 5 (APC5) (Cyclosome subunit 5)	ANAPC5 APC5	Homo sapiens (Human)	755
Q9UJX3	APC7_HUMAN	reviewed	Anaphase-promoting complex subunit 7 (APC7) (Cyclosome subunit 7)	ANAPC7 APC7	Homo sapiens (Human)	599
Q8J025	APCD1_HUMAN	reviewed	Protein APCDD1 (Adenomatosis polyposis coli down-regulated 1 protein)	APCDD1 DRAPC1 FP7019	Homo sapiens (Human)	514
Q8NCL9	APCDL_HUMAN	reviewed	Protein APCDD1-like (Adenomatosis polyposis coli down-regulated 1 protein-like)	APCDD1L	Homo sapiens (Human)	501
P25054	APC_HUMAN	reviewed	Adenomatous polyposis coli protein (Protein APC) (Deleted in polyposis 2.5)	APC DP2.5	Homo sapiens (Human)	2843
Q9ULZ1	APEL_HUMAN	reviewed	Apelin (APJ endogenous ligand) [Cleaved into: Apelin-36; Apelin-31; Apelin-28; Apelin-13]	APLN APEL	Homo sapiens (Human)	77
P27695	APEX1_HUMAN	reviewed	DNA-(apurinic or apyrimidinic site) lyase (EC 3.1.-.-) (EC 4.2.99.18) (APEX nuclease) (APEN) (Apurinic-apyrimidinic endonuclease 1) (AP endonuclease 1) (APE-1) (REF-1) (Redox factor-1) [Cleaved into: DNA-(apurinic or apyrimidinic site) lyase, mitochondrial]	APEX1 APE APE1 APEX APX HAP1 REF1	Homo sapiens (Human)	318
Q9UBZ4	APEX2_HUMAN	reviewed	DNA-(apurinic or apyrimidinic site) lyase 2 (EC 3.1.-.-) (EC 4.2.99.18) (AP endonuclease XTH2) (APEX nuclease 2) (APEX nuclease-like 2) (Apurinic-apyrimidinic endonuclease 2) (AP endonuclease 2)	APEX2 APE2 APEXL2 XTH2	Homo sapiens (Human)	518
Q96BI3	APH1A_HUMAN	reviewed	Gamma-secretase subunit APH-1A (APH-1a) (Aph-1alpha) (Presenilin-stabilization factor)	APH1A PSF CGI-78 UNQ579/PRO1141	Homo sapiens (Human)	265
Q8WW43	APH1B_HUMAN	reviewed	Gamma-secretase subunit APH-1B (APH-1b) (Aph-1beta) (Presenilin-stabilization factor-like)	APH1B PSFL UNQ688/PRO1328	Homo sapiens (Human)	257
Q9BZZ5	API5_HUMAN	reviewed	Apoptosis inhibitor 5 (API-5) (Antiapoptosis clone 11 protein) (AAC-11) (Cell migration-inducing gene 8 protein) (Fibroblast growth factor 2-interacting factor) (FIF) (Protein XAGL)	API5 MIG8	Homo sapiens (Human)	524
P35414	APJ_HUMAN	reviewed	Apelin receptor (Angiotensin receptor-like 1) (G-protein coupled receptor APJ) (G-protein coupled receptor HG11)	APLNR AGTRL1 APJ	Homo sapiens (Human)	380
Q96LR9	APLD1_HUMAN	reviewed	Apolipoprotein L domain-containing protein 1 (Vascular early response gene protein)	APOLD1 VERGE	Homo sapiens (Human)	279
Q8IW19	APLF_HUMAN	reviewed	Aprataxin and PNK-like factor (EC 4.2.99.18) (Apurinic-apyrimidinic endonuclease APLF) (PNK and APTX-like FHA domain-containing protein) (XRCC1-interacting protein 1)	APLF C2orf13 PALF XIP1	Homo sapiens (Human)	511
P51693	APLP1_HUMAN	reviewed	Amyloid-like protein 1 (APLP) (APLP-1) [Cleaved into: C30]	APLP1	Homo sapiens (Human)	650
Q06481	APLP2_HUMAN	reviewed	Amyloid-like protein 2 (APLP-2) (APPH) (Amyloid protein homolog) (CDEI box-binding protein) (CDEBP)	APLP2 APPL2	Homo sapiens (Human)	763
Q9HDC9	APMAP_HUMAN	reviewed	Adipocyte plasma membrane-associated protein (Protein BSCv)	APMAP C20orf3 UNQ1869/PRO4305	Homo sapiens (Human)	416
P02647	APOA1_HUMAN	reviewed	Apolipoprotein A-I (Apo-AI) (ApoA-I) (Apolipoprotein A1) [Cleaved into: Truncated apolipoprotein A-I (Apolipoprotein A-I(1-242))]	APOA1	Homo sapiens (Human)	267
P02652	APOA2_HUMAN	reviewed	Apolipoprotein A-II (Apo-AII) (ApoA-II) (Apolipoprotein A2) [Cleaved into: Truncated apolipoprotein A-II (Apolipoprotein A-II(1-76))]	APOA2	Homo sapiens (Human)	100
P06727	APOA4_HUMAN	reviewed	Apolipoprotein A-IV (Apo-AIV) (ApoA-IV) (Apolipoprotein A4)	APOA4	Homo sapiens (Human)	396
Q6Q788	APOA5_HUMAN	reviewed	Apolipoprotein A-V (Apo-AV) (ApoA-V) (Apolipoprotein A5) (Regeneration-associated protein 3)	APOA5 RAP3 UNQ411/PRO773	Homo sapiens (Human)	366
P08519	APOA_HUMAN	reviewed	Apolipoprotein(a) (Apo(a)) (Lp(a)) (EC 3.4.21.-)	LPA	Homo sapiens (Human)	4548
Q0VD83	APOBR_HUMAN	reviewed	Apolipoprotein B receptor (Apolipoprotein B-100 receptor) (Apolipoprotein B-48 receptor) (Apolipoprotein B48 receptor) (apoB-48R)	APOBR APOB48R	Homo sapiens (Human)	1088
P04114	APOB_HUMAN	reviewed	Apolipoprotein B-100 (Apo B-100) [Cleaved into: Apolipoprotein B-48 (Apo B-48)]	APOB	Homo sapiens (Human)	4563
P02654	APOC1_HUMAN	reviewed	Apolipoprotein C-I (Apo-CIB) (ApoC-IB) (Apolipoprotein C1) [Cleaved into: Truncated apolipoprotein C-I (Apo-CIB') (ApoC-IB')]	APOC1 APOC1B	Homo sapiens (Human)	83
P02655	APOC2_HUMAN	reviewed	Apolipoprotein C-II (Apo-CII) (ApoC-II) (Apolipoprotein C2)	APOC2 APC2	Homo sapiens (Human)	101
P02656	APOC3_HUMAN	reviewed	Apolipoprotein C-III (Apo-CIII) (ApoC-III) (Apolipoprotein C3)	APOC3	Homo sapiens (Human)	99
P55056	APOC4_HUMAN	reviewed	Apolipoprotein C-IV (Apo-CIV) (ApoC-IV) (Apolipoprotein C4)	APOC4	Homo sapiens (Human)	127
P05090	APOD_HUMAN	reviewed	Apolipoprotein D (Apo-D) (ApoD)	APOD	Homo sapiens (Human)	189
P02649	APOE_HUMAN	reviewed	Apolipoprotein E (Apo-E)	APOE	Homo sapiens (Human)	317
Q13790	APOF_HUMAN	reviewed	Apolipoprotein F (Apo-F) (Lipid transfer inhibitor protein) (LTIP)	APOF	Homo sapiens (Human)	326
P02749	APOH_HUMAN	reviewed	Beta-2-glycoprotein 1 (APC inhibitor) (Activated protein C-binding protein) (Anticardiolipin cofactor) (Apolipoprotein H) (Apo-H) (Beta-2-glycoprotein I) (B2GPI) (Beta(2)GPI)	APOH B2G1	Homo sapiens (Human)	345
O14791	APOL1_HUMAN	reviewed	Apolipoprotein L1 (Apolipoprotein L) (Apo-L) (ApoL) (Apolipoprotein L-I) (ApoL-I)	APOL1 APOL	Homo sapiens (Human)	398
Q9BQE5	APOL2_HUMAN	reviewed	Apolipoprotein L2 (Apolipoprotein L-II) (ApoL-II)	APOL2	Homo sapiens (Human)	337
O95236	APOL3_HUMAN	reviewed	Apolipoprotein L3 (Apolipoprotein L-III) (ApoL-III) (TNF-inducible protein CG12-1) (CG12_1)	APOL3	Homo sapiens (Human)	402
Q9BPW4	APOL4_HUMAN	reviewed	Apolipoprotein L4 (Apolipoprotein L-IV) (ApoL-IV)	APOL4	Homo sapiens (Human)	351
Q9BWW9	APOL5_HUMAN	reviewed	Apolipoprotein L5 (Apolipoprotein L-V) (ApoL-V)	APOL5	Homo sapiens (Human)	433
Q9BWW8	APOL6_HUMAN	reviewed	Apolipoprotein L6 (Apolipoprotein L-VI) (ApoL-VI)	APOL6 UNQ3095/PRO21341	Homo sapiens (Human)	343
O95445	APOM_HUMAN	reviewed	Apolipoprotein M (Apo-M) (ApoM) (Protein G3a)	APOM G3A NG20 HSPC336	Homo sapiens (Human)	188
Q6UXV4	APOOL_HUMAN	reviewed	Apolipoprotein O-like (Protein FAM121A)	APOOL CXorf33 FAM121A UNQ8193/PRO23204	Homo sapiens (Human)	268
Q9BUR5	APOO_HUMAN	reviewed	Apolipoprotein O (Protein FAM121B)	APOO FAM121B My025 UNQ1866/PRO4302	Homo sapiens (Human)	198
Q96IL0	APOP1_HUMAN	reviewed	Apoptogenic protein 1, mitochondrial (APOP-1)	APOPT1 APOP1 C14orf153	Homo sapiens (Human)	206
Q8IVJ8	APRG1_HUMAN	reviewed	AP20 region protein 1	APRG1 C3orf35	Homo sapiens (Human)	170
F7VJQ1	APRIO_HUMAN	reviewed	Alternative prion protein (AltPrP)		Homo sapiens (Human)	73
Q53RT3	APRV1_HUMAN	reviewed	Retroviral-like aspartic protease 1 (EC 3.4.23.-) (Skin-specific retroviral-like aspartic protease) (SASPase) (Skin aspartic protease) (TPA-inducible aspartic proteinase-like protein) (TAPS)	ASPRV1 SASP	Homo sapiens (Human)	343
Q13794	APR_HUMAN	reviewed	Phorbol-12-myristate-13-acetate-induced protein 1 (PMA-induced protein 1) (Immediate-early-response protein APR) (Protein Noxa)	PMAIP1 NOXA	Homo sapiens (Human)	54
Q7Z2E3	APTX_HUMAN	reviewed	Aprataxin (EC 3.-.-.-) (Forkhead-associated domain histidine triad-like protein) (FHA-HIT)	APTX AXA1	Homo sapiens (Human)	356
P07741	APT_HUMAN	reviewed	Adenine phosphoribosyltransferase (APRT) (EC 2.4.2.7)	APRT	Homo sapiens (Human)	180
Q8IXF9	AQ12A_HUMAN	reviewed	Aquaporin-12A (AQP-12)	AQP12A AQP12 AQPX2	Homo sapiens (Human)	295
A6NM10	AQ12B_HUMAN	reviewed	Aquaporin-12B (AQP-12B)	AQP12B	Homo sapiens (Human)	295
Q96PS8	AQP10_HUMAN	reviewed	Aquaporin-10 (AQP-10) (Aquaglyceroporin-10) (Small intestine aquaporin)	AQP10	Homo sapiens (Human)	301
Q8NBQ7	AQP11_HUMAN	reviewed	Aquaporin-11 (AQP-11)	AQP11 AQPX1 PSEC0027	Homo sapiens (Human)	271
P29972	AQP1_HUMAN	reviewed	Aquaporin-1 (AQP-1) (Aquaporin-CHIP) (Urine water channel) (Water channel protein for red blood cells and kidney proximal tubule)	AQP1 CHIP28	Homo sapiens (Human)	269
P41181	AQP2_HUMAN	reviewed	Aquaporin-2 (AQP-2) (ADH water channel) (Aquaporin-CD) (AQP-CD) (Collecting duct water channel protein) (WCH-CD) (Water channel protein for renal collecting duct)	AQP2	Homo sapiens (Human)	271
Q92482	AQP3_HUMAN	reviewed	Aquaporin-3 (AQP-3) (Aquaglyceroporin-3)	AQP3	Homo sapiens (Human)	292
P55087	AQP4_HUMAN	reviewed	Aquaporin-4 (AQP-4) (Mercurial-insensitive water channel) (MIWC) (WCH4)	AQP4	Homo sapiens (Human)	323
P55064	AQP5_HUMAN	reviewed	Aquaporin-5 (AQP-5)	AQP5	Homo sapiens (Human)	265
Q13520	AQP6_HUMAN	reviewed	Aquaporin-6 (AQP-6) (Aquaporin-2-like) (Kidney-specific aquaporin) (hKID)	AQP6 AQP2L	Homo sapiens (Human)	282
A6NL99	AQP73_HUMAN	reviewed	Putative aquaporin-7-like protein 3	AQP7P3	Homo sapiens (Human)	342
O14520	AQP7_HUMAN	reviewed	Aquaporin-7 (AQP-7) (Aquaglyceroporin-7) (Aquaporin adipose) (AQPap) (Aquaporin-7-like)	AQP7 AQP7L AQP9	Homo sapiens (Human)	342
O94778	AQP8_HUMAN	reviewed	Aquaporin-8 (AQP-8)	AQP8	Homo sapiens (Human)	261
O43315	AQP9_HUMAN	reviewed	Aquaporin-9 (AQP-9) (Aquaglyceroporin-9) (Small solute channel 1)	AQP9 SSC1	Homo sapiens (Human)	295
O60306	AQR_HUMAN	reviewed	Intron-binding protein aquarius (Intron-binding protein of 160 kDa) (IBP160)	AQR KIAA0560	Homo sapiens (Human)	1485
Q5H913	AR13A_HUMAN	reviewed	ADP-ribosylation factor-like protein 13A	ARL13A	Homo sapiens (Human)	290
Q3SXY8	AR13B_HUMAN	reviewed	ADP-ribosylation factor-like protein 13B (ADP-ribosylation factor-like protein 2-like 1) (ARL2-like protein 1)	ARL13B ARL2L1	Homo sapiens (Human)	428
Q6NSI1	AR26L_HUMAN	reviewed	Putative ankyrin repeat domain-containing protein 26-like protein	ANKRD26P1	Homo sapiens (Human)	321
A8MYR8	AR2BL_HUMAN	reviewed	ADP-ribosylation factor-like protein 2-binding protein-like protein (ARF-like 2-binding protein-like protein) (ARL2BP-like protein)		Homo sapiens (Human)	161
Q9Y2Y0	AR2BP_HUMAN	reviewed	ADP-ribosylation factor-like protein 2-binding protein (ARF-like 2-binding protein) (Binder of ARF2 protein 1)	ARL2BP BART BART1	Homo sapiens (Human)	163
Q15041	AR6P1_HUMAN	reviewed	ADP-ribosylation factor-like protein 6-interacting protein 1 (ARL-6-interacting protein 1) (Aip-1)	ARL6IP1 ARL6IP KIAA0069	Homo sapiens (Human)	203
Q66PJ3	AR6P4_HUMAN	reviewed	ADP-ribosylation factor-like protein 6-interacting protein 4 (ARL-6-interacting protein 4) (Aip-4) (HSP-975) (HSVI-binding protein) (SR-15) (SRp25) (SR-25)	ARL6IP4	Homo sapiens (Human)	360
Q8N6S5	AR6P6_HUMAN	reviewed	ADP-ribosylation factor-like protein 6-interacting protein 6 (ARL-6-interacting protein 6) (Aip-6) (Phosphonoformate immuno-associated protein 1)	ARL6IP6 PFAAP1	Homo sapiens (Human)	226
P10398	ARAF_HUMAN	reviewed	Serine/threonine-protein kinase A-Raf (EC 2.7.11.1) (Proto-oncogene A-Raf) (Proto-oncogene A-Raf-1) (Proto-oncogene Pks)	ARAF ARAF1 PKS PKS2	Homo sapiens (Human)	606
Q6UW56	ARAID_HUMAN	reviewed	All-trans retinoic acid-induced differentiation factor (Apoptosis-related protein 3) (APR-3) (p18)	ATRAID APR3 C2orf28 HSPC013 UNQ214/PRO240	Homo sapiens (Human)	229
Q96P48	ARAP1_HUMAN	reviewed	Arf-GAP with Rho-GAP domain, ANK repeat and PH domain-containing protein 1 (Centaurin-delta-2) (Cnt-d2)	ARAP1 CENTD2 KIAA0782	Homo sapiens (Human)	1450
Q8WZ64	ARAP2_HUMAN	reviewed	Arf-GAP with Rho-GAP domain, ANK repeat and PH domain-containing protein 2 (Centaurin-delta-1) (Cnt-d1) (Protein PARX)	ARAP2 CENTD1 KIAA0580	Homo sapiens (Human)	1704
Q8WWN8	ARAP3_HUMAN	reviewed	Arf-GAP with Rho-GAP domain, ANK repeat and PH domain-containing protein 3 (Centaurin-delta-3) (Cnt-d3)	ARAP3 CENTD3	Homo sapiens (Human)	1544
Q96IT6	ARAS1_HUMAN	reviewed	Putative uncharacterized protein ARHGAP5-AS1 (ARHGAP5 antisense RNA 1) (ARHGAP5 antisense gene protein 1)	ARHGAP5-AS1 C14orf128	Homo sapiens (Human)	56
P25098	ARBK1_HUMAN	reviewed	Beta-adrenergic receptor kinase 1 (Beta-ARK-1) (EC 2.7.11.15) (G-protein coupled receptor kinase 2)	ADRBK1 BARK BARK1 GRK2	Homo sapiens (Human)	689
P35626	ARBK2_HUMAN	reviewed	Beta-adrenergic receptor kinase 2 (Beta-ARK-2) (EC 2.7.11.15) (G-protein-coupled receptor kinase 3)	ADRBK2 BARK2 GRK3	Homo sapiens (Human)	688
Q92747	ARC1A_HUMAN	reviewed	Actin-related protein 2/3 complex subunit 1A (SOP2-like protein)	ARPC1A SOP2L	Homo sapiens (Human)	370
O15143	ARC1B_HUMAN	reviewed	Actin-related protein 2/3 complex subunit 1B (Arp2/3 complex 41 kDa subunit) (p41-ARC)	ARPC1B ARC41	Homo sapiens (Human)	372
Q8IWT0	ARCH_HUMAN	reviewed	Protein archease (Protein ZBTB8OS) (Zinc finger and BTB domain-containing opposite strand protein 8)	ZBTB8OS ARCH	Homo sapiens (Human)	167
Q7LC44	ARC_HUMAN	reviewed	Activity-regulated cytoskeleton-associated protein (ARC/ARG3.1) (Activity-regulated gene 3.1 protein homolog) (Arg3.1)	ARC KIAA0278	Homo sapiens (Human)	396
P15514	AREG_HUMAN	reviewed	Amphiregulin (AR) (Colorectum cell-derived growth factor) (CRDGF)	AREG SDGF; AREGB	Homo sapiens (Human)	252
P84077	ARF1_HUMAN	reviewed	ADP-ribosylation factor 1	ARF1	Homo sapiens (Human)	181
P61204	ARF3_HUMAN	reviewed	ADP-ribosylation factor 3	ARF3	Homo sapiens (Human)	181
P18085	ARF4_HUMAN	reviewed	ADP-ribosylation factor 4	ARF4 ARF2	Homo sapiens (Human)	180
P84085	ARF5_HUMAN	reviewed	ADP-ribosylation factor 5	ARF5	Homo sapiens (Human)	180
P62330	ARF6_HUMAN	reviewed	ADP-ribosylation factor 6	ARF6	Homo sapiens (Human)	175
Q8N6T3	ARFG1_HUMAN	reviewed	ADP-ribosylation factor GTPase-activating protein 1 (ARF GAP 1) (ADP-ribosylation factor 1 GTPase-activating protein) (ARF1 GAP) (ARF1-directed GTPase-activating protein)	ARFGAP1 ARF1GAP	Homo sapiens (Human)	406
Q8N6H7	ARFG2_HUMAN	reviewed	ADP-ribosylation factor GTPase-activating protein 2 (ARF GAP 2) (GTPase-activating protein ZNF289) (Zinc finger protein 289)	ARFGAP2 ZNF289 Nbla10535	Homo sapiens (Human)	521
Q9NP61	ARFG3_HUMAN	reviewed	ADP-ribosylation factor GTPase-activating protein 3 (ARF GAP 3)	ARFGAP3 ARFGAP1	Homo sapiens (Human)	516
P53367	ARFP1_HUMAN	reviewed	Arfaptin-1 (ADP-ribosylation factor-interacting protein 1)	ARFIP1	Homo sapiens (Human)	373
P53365	ARFP2_HUMAN	reviewed	Arfaptin-2 (ADP-ribosylation factor-interacting protein 2) (Partner of RAC1) (Protein POR1)	ARFIP2 POR1	Homo sapiens (Human)	341
Q13795	ARFRP_HUMAN	reviewed	ADP-ribosylation factor-related protein 1 (ARF-related protein 1) (ARP)	ARFRP1 ARP1	Homo sapiens (Human)	201
Q8N1W1	ARG28_HUMAN	reviewed	Rho guanine nucleotide exchange factor 28 (190 kDa guanine nucleotide exchange factor) (p190-RhoGEF) (p190RhoGEF) (Rho guanine nucleotide exchange factor)	ARHGEF28 KIAA1998 RGNEF	Homo sapiens (Human)	1705
A8MVX0	ARG33_HUMAN	reviewed	Rho guanine nucleotide exchange factor 33	ARHGEF33	Homo sapiens (Human)	844
A5YM69	ARG35_HUMAN	reviewed	Rho guanine nucleotide exchange factor 35 (Rho guanine nucleotide exchange factor 5-like protein)	ARHGEF35 ARHGEF5L	Homo sapiens (Human)	484
Q8N4T4	ARG39_HUMAN	reviewed	Rho guanine nucleotide exchange factor 39	ARHGEF39 C9orf100	Homo sapiens (Human)	335
Q9HCE6	ARGAL_HUMAN	reviewed	Rho guanine nucleotide exchange factor 10-like protein (GrinchGEF)	ARHGEF10L GRINCHGEF KIAA1626	Homo sapiens (Human)	1279
A6NJG6	ARGFX_HUMAN	reviewed	Arginine-fifty homeobox	ARGFX	Homo sapiens (Human)	315
P05089	ARGI1_HUMAN	reviewed	Arginase-1 (EC 3.5.3.1) (Liver-type arginase) (Type I arginase)	ARG1	Homo sapiens (Human)	322
P78540	ARGI2_HUMAN	reviewed	Arginase-2, mitochondrial (EC 3.5.3.1) (Kidney-type arginase) (Non-hepatic arginase) (Type II arginase)	ARG2	Homo sapiens (Human)	354
Q9NWB6	ARGL1_HUMAN	reviewed	Arginine and glutamate-rich protein 1	ARGLU1	Homo sapiens (Human)	273
A1IGU5	ARH37_HUMAN	reviewed	Rho guanine nucleotide exchange factor 37	ARHGEF37	Homo sapiens (Human)	675
Q9NXL2	ARH38_HUMAN	reviewed	Rho guanine nucleotide exchange factor 38	ARHGEF38	Homo sapiens (Human)	219
Q8TER5	ARH40_HUMAN	reviewed	Rho guanine nucleotide exchange factor 40 (Protein SOLO)	ARHGEF40 SOLO	Homo sapiens (Human)	1519
Q92888	ARHG1_HUMAN	reviewed	Rho guanine nucleotide exchange factor 1 (115 kDa guanine nucleotide exchange factor) (p115-RhoGEF) (p115RhoGEF) (Sub1.5)	ARHGEF1	Homo sapiens (Human)	912
Q92974	ARHG2_HUMAN	reviewed	Rho guanine nucleotide exchange factor 2 (Guanine nucleotide exchange factor H1) (GEF-H1) (Microtubule-regulated Rho-GEF) (Proliferating cell nucleolar antigen p40)	ARHGEF2 KIAA0651 LFP40	Homo sapiens (Human)	986
Q9NR81	ARHG3_HUMAN	reviewed	Rho guanine nucleotide exchange factor 3 (Exchange factor found in platelets and leukemic and neuronal tissues) (XPLN)	ARHGEF3	Homo sapiens (Human)	526
Q9NR80	ARHG4_HUMAN	reviewed	Rho guanine nucleotide exchange factor 4 (APC-stimulated guanine nucleotide exchange factor 1) (Asef) (Asef1)	ARHGEF4 KIAA1112	Homo sapiens (Human)	690
Q12774	ARHG5_HUMAN	reviewed	Rho guanine nucleotide exchange factor 5 (Ephexin-3) (Guanine nucleotide regulatory protein TIM) (Oncogene TIM) (Transforming immortalized mammary oncogene) (p60 TIM)	ARHGEF5 TIM	Homo sapiens (Human)	1597
Q15052	ARHG6_HUMAN	reviewed	Rho guanine nucleotide exchange factor 6 (Alpha-Pix) (COOL-2) (PAK-interacting exchange factor alpha) (Rac/Cdc42 guanine nucleotide exchange factor 6)	ARHGEF6 COOL2 KIAA0006 PIXA	Homo sapiens (Human)	776
Q14155	ARHG7_HUMAN	reviewed	Rho guanine nucleotide exchange factor 7 (Beta-Pix) (COOL-1) (PAK-interacting exchange factor beta) (p85)	ARHGEF7 COOL1 KIAA0142 P85SPR PAK3BP PIXB Nbla10314	Homo sapiens (Human)	803
Q7Z628	ARHG8_HUMAN	reviewed	Neuroepithelial cell-transforming gene 1 protein (Proto-oncogene p65 Net1) (Rho guanine nucleotide exchange factor 8)	NET1 ARHGEF8	Homo sapiens (Human)	596
O43307	ARHG9_HUMAN	reviewed	Rho guanine nucleotide exchange factor 9 (Collybistin) (PEM-2 homolog) (Rac/Cdc42 guanine nucleotide exchange factor 9)	ARHGEF9 ARHDH9 KIAA0424	Homo sapiens (Human)	516
O15013	ARHGA_HUMAN	reviewed	Rho guanine nucleotide exchange factor 10	ARHGEF10 KIAA0294	Homo sapiens (Human)	1369
O15085	ARHGB_HUMAN	reviewed	Rho guanine nucleotide exchange factor 11 (PDZ-RhoGEF)	ARHGEF11 KIAA0380	Homo sapiens (Human)	1522
Q9NZN5	ARHGC_HUMAN	reviewed	Rho guanine nucleotide exchange factor 12 (Leukemia-associated RhoGEF)	ARHGEF12 KIAA0382 LARG	Homo sapiens (Human)	1544
O94989	ARHGF_HUMAN	reviewed	Rho guanine nucleotide exchange factor 15 (Ephexin-5) (E5) (Vsm-RhoGEF)	ARHGEF15 KIAA0915	Homo sapiens (Human)	841
Q5VV41	ARHGG_HUMAN	reviewed	Rho guanine nucleotide exchange factor 16 (Ephexin-4)	ARHGEF16 EPHEXIN4 NBR	Homo sapiens (Human)	709
Q96PE2	ARHGH_HUMAN	reviewed	Rho guanine nucleotide exchange factor 17 (164 kDa Rho-specific guanine-nucleotide exchange factor) (p164-RhoGEF) (p164RhoGEF) (Tumor endothelial marker 4)	ARHGEF17 KIAA0337 TEM4	Homo sapiens (Human)	2063
Q6ZSZ5	ARHGI_HUMAN	reviewed	Rho guanine nucleotide exchange factor 18 (114 kDa Rho-specific guanine nucleotide exchange factor) (p114-Rho-GEF) (p114RhoGEF) (Septin-associated RhoGEF) (SA-RhoGEF)	ARHGEF18 KIAA0521	Homo sapiens (Human)	1173
Q8IW93	ARHGJ_HUMAN	reviewed	Rho guanine nucleotide exchange factor 19 (Ephexin-2)	ARHGEF19	Homo sapiens (Human)	802
Q86VW2	ARHGP_HUMAN	reviewed	Rho guanine nucleotide exchange factor 25 (Guanine nucleotide exchange factor GEFT) (Rac/Cdc42/Rho exchange factor GEFT) (RhoA/Rac/Cdc42 guanine nucleotide exchange factor GEFT) (p63RhoGEF)	ARHGEF25 GEFT	Homo sapiens (Human)	580
Q96DR7	ARHGQ_HUMAN	reviewed	Rho guanine nucleotide exchange factor 26 (SH3 domain-containing guanine exchange factor)	ARHGEF26 SGEF HMFN1864	Homo sapiens (Human)	871
Q8NDY3	ARHL1_HUMAN	reviewed	[Protein ADP-ribosylarginine] hydrolase-like protein 1 (EC 3.2.-.-) (ADP-ribosylhydrolase 2)	ADPRHL1 ARH2	Homo sapiens (Human)	354
Q9NX46	ARHL2_HUMAN	reviewed	Poly(ADP-ribose) glycohydrolase ARH3 (EC 3.2.1.143) (ADP-ribosylhydrolase 3) ([Protein ADP-ribosylarginine] hydrolase-like protein 2)	ADPRHL2 ARH3	Homo sapiens (Human)	363
Q5SW96	ARH_HUMAN	reviewed	Low density lipoprotein receptor adapter protein 1 (Autosomal recessive hypercholesterolemia protein)	LDLRAP1 ARH	Homo sapiens (Human)	308
O14497	ARI1A_HUMAN	reviewed	AT-rich interactive domain-containing protein 1A (ARID domain-containing protein 1A) (B120) (BRG1-associated factor 250) (BAF250) (BRG1-associated factor 250a) (BAF250A) (Osa homolog 1) (hOSA1) (SWI-like protein) (SWI/SNF complex protein p270) (SWI/SNF-related, matrix-associated, actin-dependent regulator of chromatin subfamily F member 1) (hELD)	ARID1A BAF250 BAF250A C1orf4 OSA1 SMARCF1	Homo sapiens (Human)	2285
Q8NFD5	ARI1B_HUMAN	reviewed	AT-rich interactive domain-containing protein 1B (ARID domain-containing protein 1B) (BRG1-associated factor 250b) (BAF250B) (BRG1-binding protein hELD/OSA1) (Osa homolog 2) (hOsa2) (p250R)	ARID1B BAF250B DAN15 KIAA1235 OSA2	Homo sapiens (Human)	2236
Q9Y4X5	ARI1_HUMAN	reviewed	E3 ubiquitin-protein ligase ARIH1 (EC 6.3.2.-) (H7-AP2) (HHARI) (Monocyte protein 6) (MOP-6) (Protein ariadne-1 homolog) (ARI-1) (UbcH7-binding protein) (UbcM4-interacting protein) (Ubiquitin-conjugating enzyme E2-binding protein 1)	ARIH1 ARI MOP6 UBCH7BP HUSSY-27	Homo sapiens (Human)	557
Q8N7S6	ARI2O_HUMAN	reviewed	Uncharacterized protein ARIH2OS (Ariadne-2 homolog opposite strand protein)	ARIH2OS C3orf71	Homo sapiens (Human)	290
O95376	ARI2_HUMAN	reviewed	E3 ubiquitin-protein ligase ARIH2 (ARI-2) (Protein ariadne-2 homolog) (EC 6.3.2.-) (Triad1 protein)	ARIH2 ARI2 TRIAD1 HT005	Homo sapiens (Human)	493
Q99856	ARI3A_HUMAN	reviewed	AT-rich interactive domain-containing protein 3A (ARID domain-containing protein 3A) (B-cell regulator of IgH transcription) (Bright) (Dead ringer-like protein 1) (E2F-binding protein 1)	ARID3A DRIL1 DRIL3 DRX E2FBP1	Homo sapiens (Human)	593
Q8IVW6	ARI3B_HUMAN	reviewed	AT-rich interactive domain-containing protein 3B (ARID domain-containing protein 3B) (Bright and dead ringer protein) (Bright-like protein)	ARID3B BDP DRIL2	Homo sapiens (Human)	561
A6NKF2	ARI3C_HUMAN	reviewed	AT-rich interactive domain-containing protein 3C (ARID domain-containing protein 3C)	ARID3C	Homo sapiens (Human)	412
P29374	ARI4A_HUMAN	reviewed	AT-rich interactive domain-containing protein 4A (ARID domain-containing protein 4A) (Retinoblastoma-binding protein 1) (RBBP-1)	ARID4A RBBP1 RBP1	Homo sapiens (Human)	1257
Q4LE39	ARI4B_HUMAN	reviewed	AT-rich interactive domain-containing protein 4B (ARID domain-containing protein 4B) (180 kDa Sin3-associated polypeptide) (Sin3-associated polypeptide p180) (Breast cancer-associated antigen BRCAA1) (Histone deacetylase complex subunit SAP180) (Retinoblastoma-binding protein 1-like 1)	ARID4B BRCAA1 RBBP1L1 RBP1L1 SAP180	Homo sapiens (Human)	1312
Q03989	ARI5A_HUMAN	reviewed	AT-rich interactive domain-containing protein 5A (ARID domain-containing protein 5A) (Modulator recognition factor 1) (MRF-1)	ARID5A MRF1	Homo sapiens (Human)	594
Q14865	ARI5B_HUMAN	reviewed	AT-rich interactive domain-containing protein 5B (ARID domain-containing protein 5B) (MRF1-like protein) (Modulator recognition factor 2) (MRF-2)	ARID5B DESRT MRF2	Homo sapiens (Human)	1188
Q68CP9	ARID2_HUMAN	reviewed	AT-rich interactive domain-containing protein 2 (ARID domain-containing protein 2) (BRG1-associated factor 200) (BAF200) (Zinc finger protein with activation potential) (Zipzap/p200)	ARID2 KIAA1557	Homo sapiens (Human)	1835
Q9Y4B4	ARIP4_HUMAN	reviewed	Helicase ARIP4 (EC 3.6.4.12) (Androgen receptor-interacting protein 4) (RAD54-like protein 2)	RAD54L2 ARIP4 KIAA0809	Homo sapiens (Human)	1467
O43488	ARK72_HUMAN	reviewed	Aflatoxin B1 aldehyde reductase member 2 (EC 1.1.1.n11) (AFB1 aldehyde reductase 1) (AFB1-AR 1) (Aldoketoreductase 7) (Succinic semialdehyde reductase) (SSA reductase)	AKR7A2 AFAR AFAR1 AKR7	Homo sapiens (Human)	359
O95154	ARK73_HUMAN	reviewed	Aflatoxin B1 aldehyde reductase member 3 (EC 1.-.-.-) (AFB1 aldehyde reductase 2) (AFB1-AR 2)	AKR7A3 AFAR2	Homo sapiens (Human)	331
Q8NHP1	ARK74_HUMAN	reviewed	Aflatoxin B1 aldehyde reductase member 4 (EC 1.-.-.-) (AFB1 aldehyde reductase 3) (AFB1-AR 3) (Aldoketoreductase 7-like)	AKR7L AFAR3 AKR7A4	Homo sapiens (Human)	331
Q8N8L6	ARL10_HUMAN	reviewed	ADP-ribosylation factor-like protein 10	ARL10 ARL10A	Homo sapiens (Human)	244
Q969Q4	ARL11_HUMAN	reviewed	ADP-ribosylation factor-like protein 11 (ADP-ribosylation factor-like tumor suppressor protein 1)	ARL11 ARLTS1	Homo sapiens (Human)	196
Q8N4G2	ARL14_HUMAN	reviewed	ADP-ribosylation factor-like protein 14 (ADP-ribosylation factor 7)	ARL14 ARF7	Homo sapiens (Human)	192
Q9NXU5	ARL15_HUMAN	reviewed	ADP-ribosylation factor-like protein 15 (ADP-ribosylation factor-related protein 2) (ARF-related protein 2)	ARL15 ARFRP2	Homo sapiens (Human)	204
Q0P5N6	ARL16_HUMAN	reviewed	ADP-ribosylation factor-like protein 16	ARL16	Homo sapiens (Human)	197
Q8IVW1	ARL17_HUMAN	reviewed	ADP-ribosylation factor-like protein 17 (ADP-ribosylation factor 7 variant)	ARL17A ARL17P1; ARL17B ARF1P2 ARL17A PRO2667	Homo sapiens (Human)	177
P40616	ARL1_HUMAN	reviewed	ADP-ribosylation factor-like protein 1	ARL1	Homo sapiens (Human)	181
P36404	ARL2_HUMAN	reviewed	ADP-ribosylation factor-like protein 2	ARL2	Homo sapiens (Human)	184
P36405	ARL3_HUMAN	reviewed	ADP-ribosylation factor-like protein 3	ARL3 ARFL3	Homo sapiens (Human)	182
P40617	ARL4A_HUMAN	reviewed	ADP-ribosylation factor-like protein 4A	ARL4A ARL4	Homo sapiens (Human)	200
P56559	ARL4C_HUMAN	reviewed	ADP-ribosylation factor-like protein 4C (ADP-ribosylation factor-like protein 7) (ADP-ribosylation factor-like protein LAK)	ARL4C ARL7	Homo sapiens (Human)	192
P49703	ARL4D_HUMAN	reviewed	ADP-ribosylation factor-like protein 4D (ADP-ribosylation factor-like protein 4L)	ARL4D ARF4L	Homo sapiens (Human)	201
Q9Y689	ARL5A_HUMAN	reviewed	ADP-ribosylation factor-like protein 5A	ARL5A ARFLP5 ARL5	Homo sapiens (Human)	179
Q96KC2	ARL5B_HUMAN	reviewed	ADP-ribosylation factor-like protein 5B (ADP-ribosylation factor-like protein 8)	ARL5B ARL8	Homo sapiens (Human)	179
A6NH57	ARL5C_HUMAN	reviewed	Putative ADP-ribosylation factor-like protein 5C (ADP-ribosylation factor-like protein 12)	ARL5C ARL12	Homo sapiens (Human)	179
Q9H0F7	ARL6_HUMAN	reviewed	ADP-ribosylation factor-like protein 6 (Bardet-Biedl syndrome 3 protein)	ARL6	Homo sapiens (Human)	186
Q96BM9	ARL8A_HUMAN	reviewed	ADP-ribosylation factor-like protein 8A (ADP-ribosylation factor-like protein 10B) (Novel small G protein indispensable for equal chromosome segregation 2)	ARL8A ARL10B GIE2	Homo sapiens (Human)	186
Q9NVJ2	ARL8B_HUMAN	reviewed	ADP-ribosylation factor-like protein 8B (ADP-ribosylation factor-like protein 10C) (Novel small G protein indispensable for equal chromosome segregation 1)	ARL8B ARL10C GIE1	Homo sapiens (Human)	186
Q6T311	ARL9_HUMAN	reviewed	ADP-ribosylation factor-like protein 9	ARL9	Homo sapiens (Human)	187
P04424	ARLY_HUMAN	reviewed	Argininosuccinate lyase (ASAL) (EC 4.3.2.1) (Arginosuccinase)	ASL	Homo sapiens (Human)	464
Q8N2F6	ARM10_HUMAN	reviewed	Armadillo repeat-containing protein 10 (Splicing variant involved in hepatocarcinogenesis protein)	ARMC10 SVH PSEC0198	Homo sapiens (Human)	343
Q5T9G4	ARM12_HUMAN	reviewed	Armadillo repeat-containing protein 12	ARMC12 C6orf81	Homo sapiens (Human)	340
Q9NVT9	ARMC1_HUMAN	reviewed	Armadillo repeat-containing protein 1	ARMC1 ARCP	Homo sapiens (Human)	282
Q8NEN0	ARMC2_HUMAN	reviewed	Armadillo repeat-containing protein 2	ARMC2	Homo sapiens (Human)	867
Q5W041	ARMC3_HUMAN	reviewed	Armadillo repeat-containing protein 3 (Beta-catenin-like protein) (Cancer/testis antigen 81) (CT81) (KU-CT-1)	ARMC3	Homo sapiens (Human)	872
Q5T2S8	ARMC4_HUMAN	reviewed	Armadillo repeat-containing protein 4	ARMC4	Homo sapiens (Human)	1044
Q96C12	ARMC5_HUMAN	reviewed	Armadillo repeat-containing protein 5	ARMC5	Homo sapiens (Human)	935
Q6NXE6	ARMC6_HUMAN	reviewed	Armadillo repeat-containing protein 6	ARMC6	Homo sapiens (Human)	501
Q9H6L4	ARMC7_HUMAN	reviewed	Armadillo repeat-containing protein 7	ARMC7	Homo sapiens (Human)	198
Q8IUR7	ARMC8_HUMAN	reviewed	Armadillo repeat-containing protein 8	ARMC8 S863-2	Homo sapiens (Human)	673
Q7Z3E5	ARMC9_HUMAN	reviewed	LisH domain-containing protein ARMC9 (Melanoma/melanocyte-specific tumor antigen KU-MEL-1) (NS21)	ARMC9 KIAA1868	Homo sapiens (Human)	817
P0C7Q2	ARMS2_HUMAN	reviewed	Age-related maculopathy susceptibility protein 2	ARMS2	Homo sapiens (Human)	107
Q9P291	ARMX1_HUMAN	reviewed	Armadillo repeat-containing X-linked protein 1 (ARM protein lost in epithelial cancers on chromosome X 1) (Protein ALEX1)	ARMCX1 ALEX1 AD032	Homo sapiens (Human)	453
Q7L311	ARMX2_HUMAN	reviewed	Armadillo repeat-containing X-linked protein 2 (ARM protein lost in epithelial cancers on chromosome X 2) (Protein ALEX2)	ARMCX2 ALEX2 KIAA0512	Homo sapiens (Human)	632
Q9UH62	ARMX3_HUMAN	reviewed	Armadillo repeat-containing X-linked protein 3 (ARM protein lost in epithelial cancers on chromosome X 3) (Protein ALEX3)	ARMCX3 ALEX3 BM-017 UNQ2517/PRO6007	Homo sapiens (Human)	379
Q5H9R4	ARMX4_HUMAN	reviewed	Armadillo repeat-containing X-linked protein 4	ARMCX4	Homo sapiens (Human)	360
Q6P1M9	ARMX5_HUMAN	reviewed	Armadillo repeat-containing X-linked protein 5	ARMCX5	Homo sapiens (Human)	558
Q7L4S7	ARMX6_HUMAN	reviewed	Protein ARMCX6	ARMCX6	Homo sapiens (Human)	300
Q9HBZ2	ARNT2_HUMAN	reviewed	Aryl hydrocarbon receptor nuclear translocator 2 (ARNT protein 2) (Class E basic helix-loop-helix protein 1) (bHLHe1)	ARNT2 BHLHE1 KIAA0307	Homo sapiens (Human)	717
P27540	ARNT_HUMAN	reviewed	Aryl hydrocarbon receptor nuclear translocator (ARNT protein) (Class E basic helix-loop-helix protein 2) (bHLHe2) (Dioxin receptor, nuclear translocator) (Hypoxia-inducible factor 1-beta) (HIF-1-beta) (HIF1-beta)	ARNT BHLHE2	Homo sapiens (Human)	789
Q86WX3	AROS_HUMAN	reviewed	Active regulator of SIRT1 (40S ribosomal protein S19-binding protein 1) (RPS19-binding protein 1) (S19BP)	RPS19BP1 AROS	Homo sapiens (Human)	136
Q9NZ32	ARP10_HUMAN	reviewed	Actin-related protein 10 (Actin-related protein 11) (hARP11)	ACTR10 ACTR11 ARP11	Homo sapiens (Human)	417
P56211	ARP19_HUMAN	reviewed	cAMP-regulated phosphoprotein 19 (ARPP-19)	ARPP19	Homo sapiens (Human)	112
Q9UBL0	ARP21_HUMAN	reviewed	cAMP-regulated phosphoprotein 21 (ARPP-21) (Thymocyte cAMP-regulated phosphoprotein)	ARPP21 TARPP	Homo sapiens (Human)	812
P61160	ARP2_HUMAN	reviewed	Actin-related protein 2 (Actin-like protein 2)	ACTR2 ARP2	Homo sapiens (Human)	394
Q9P1U1	ARP3B_HUMAN	reviewed	Actin-related protein 3B (ARP3-beta) (Actin-like protein 3B) (Actin-related protein ARP4)	ACTR3B ARP11 ARP4	Homo sapiens (Human)	418
Q9C0K3	ARP3C_HUMAN	reviewed	Actin-related protein 3C (Actin-related protein 11)	ACTR3C ARP11	Homo sapiens (Human)	210
P61158	ARP3_HUMAN	reviewed	Actin-related protein 3 (Actin-like protein 3)	ACTR3 ARP3	Homo sapiens (Human)	418
Q9BPX5	ARP5L_HUMAN	reviewed	Actin-related protein 2/3 complex subunit 5-like protein (Arp2/3 complex 16 kDa subunit 2) (ARC16-2)	ARPC5L	Homo sapiens (Human)	153
Q9H9F9	ARP5_HUMAN	reviewed	Actin-related protein 5 (hARP5) (Sarcoma antigen NY-SAR-16)	ACTR5 ARP5	Homo sapiens (Human)	607
Q9GZN1	ARP6_HUMAN	reviewed	Actin-related protein 6 (hArp6) (hARPX)	ACTR6 CDA12	Homo sapiens (Human)	396
Q9H981	ARP8_HUMAN	reviewed	Actin-related protein 8 (hArp8) (INO80 complex subunit N)	ACTR8 ARP8 INO80N	Homo sapiens (Human)	624
O15144	ARPC2_HUMAN	reviewed	Actin-related protein 2/3 complex subunit 2 (Arp2/3 complex 34 kDa subunit) (p34-ARC)	ARPC2 ARC34 PRO2446	Homo sapiens (Human)	300
O15145	ARPC3_HUMAN	reviewed	Actin-related protein 2/3 complex subunit 3 (Arp2/3 complex 21 kDa subunit) (p21-ARC)	ARPC3 ARC21	Homo sapiens (Human)	178
P59998	ARPC4_HUMAN	reviewed	Actin-related protein 2/3 complex subunit 4 (Arp2/3 complex 20 kDa subunit) (p20-ARC)	ARPC4 ARC20	Homo sapiens (Human)	168
O15511	ARPC5_HUMAN	reviewed	Actin-related protein 2/3 complex subunit 5 (Arp2/3 complex 16 kDa subunit) (p16-ARC)	ARPC5 ARC16	Homo sapiens (Human)	151
P49407	ARRB1_HUMAN	reviewed	Beta-arrestin-1 (Arrestin beta-1)	ARRB1 ARR1	Homo sapiens (Human)	418
P32121	ARRB2_HUMAN	reviewed	Beta-arrestin-2 (Arrestin beta-2)	ARRB2 ARB2 ARR2	Homo sapiens (Human)	409
P36575	ARRC_HUMAN	reviewed	Arrestin-C (Cone arrestin) (C-arrestin) (cArr) (Retinal cone arrestin-3) (X-arrestin)	ARR3 ARRX CAR	Homo sapiens (Human)	388
Q8N5I2	ARRD1_HUMAN	reviewed	Arrestin domain-containing protein 1	ARRDC1	Homo sapiens (Human)	433
Q8TBH0	ARRD2_HUMAN	reviewed	Arrestin domain-containing protein 2	ARRDC2 PP2703	Homo sapiens (Human)	407
Q96B67	ARRD3_HUMAN	reviewed	Arrestin domain-containing protein 3 (TBP-2-like inducible membrane protein) (TLIMP)	ARRDC3 KIAA1376	Homo sapiens (Human)	414
Q8NCT1	ARRD4_HUMAN	reviewed	Arrestin domain-containing protein 4	ARRDC4	Homo sapiens (Human)	418
A6NEK1	ARRD5_HUMAN	reviewed	Arrestin domain-containing protein 5	ARRDC5	Homo sapiens (Human)	342
P10523	ARRS_HUMAN	reviewed	S-arrestin (48 kDa protein) (Retinal S-antigen) (S-AG) (Rod photoreceptor arrestin)	SAG	Homo sapiens (Human)	405
P15289	ARSA_HUMAN	reviewed	Arylsulfatase A (ASA) (EC 3.1.6.8) (Cerebroside-sulfatase) [Cleaved into: Arylsulfatase A component B; Arylsulfatase A component C]	ARSA	Homo sapiens (Human)	507
P15848	ARSB_HUMAN	reviewed	Arylsulfatase B (ASB) (EC 3.1.6.12) (N-acetylgalactosamine-4-sulfatase) (G4S)	ARSB	Homo sapiens (Human)	533
P51689	ARSD_HUMAN	reviewed	Arylsulfatase D (ASD) (EC 3.1.6.-)	ARSD	Homo sapiens (Human)	593
P51690	ARSE_HUMAN	reviewed	Arylsulfatase E (ASE) (EC 3.1.6.-)	ARSE	Homo sapiens (Human)	589
P54793	ARSF_HUMAN	reviewed	Arylsulfatase F (ASF) (EC 3.1.6.-)	ARSF	Homo sapiens (Human)	590
Q96EG1	ARSG_HUMAN	reviewed	Arylsulfatase G (ASG) (EC 3.1.6.-)	ARSG KIAA1001 UNQ839/PRO1777	Homo sapiens (Human)	525
Q5FYA8	ARSH_HUMAN	reviewed	Arylsulfatase H (ASH) (EC 3.1.6.-)	ARSH	Homo sapiens (Human)	562
Q5FYB1	ARSI_HUMAN	reviewed	Arylsulfatase I (ASI) (EC 3.1.6.-)	ARSI	Homo sapiens (Human)	569
Q5FYB0	ARSJ_HUMAN	reviewed	Arylsulfatase J (ASJ) (EC 3.1.6.-)	ARSJ UNQ372/PRO708	Homo sapiens (Human)	599
Q6UWY0	ARSK_HUMAN	reviewed	Arylsulfatase K (ASK) (EC 3.1.6.-) (Telethon sulfatase)	ARSK TSULF UNQ630/PRO1246	Homo sapiens (Human)	536
Q5T4W7	ARTN_HUMAN	reviewed	Artemin (Enovin) (Neublastin)	ARTN EVN	Homo sapiens (Human)	220
Q9H2C2	ARV1_HUMAN	reviewed	Protein ARV1 (hARV1)	ARV1 HT035	Homo sapiens (Human)	271
O00192	ARVC_HUMAN	reviewed	Armadillo repeat protein deleted in velo-cardio-facial syndrome	ARVCF	Homo sapiens (Human)	962
Q96QS3	ARX_HUMAN	reviewed	Homeobox protein ARX (Aristaless-related homeobox)	ARX	Homo sapiens (Human)	562
P18440	ARY1_HUMAN	reviewed	Arylamine N-acetyltransferase 1 (EC 2.3.1.5) (Arylamide acetylase 1) (Monomorphic arylamine N-acetyltransferase) (MNAT) (N-acetyltransferase type 1) (NAT-1)	NAT1 AAC1	Homo sapiens (Human)	290
P11245	ARY2_HUMAN	reviewed	Arylamine N-acetyltransferase 2 (EC 2.3.1.5) (Arylamide acetylase 2) (N-acetyltransferase type 2) (NAT-2) (Polymorphic arylamine N-acetyltransferase) (PNAT)	NAT2 AAC2	Homo sapiens (Human)	290
Q9HBK9	AS3MT_HUMAN	reviewed	Arsenite methyltransferase (EC 2.1.1.137) (Methylarsonite methyltransferase) (S-adenosyl-L-methionine:arsenic(III) methyltransferase)	AS3MT CYT19	Homo sapiens (Human)	375
P0C7U1	ASA2B_HUMAN	reviewed	Putative inactive neutral ceramidase B (ASAH2-like protein) (Putative inactive N-acylsphingosine amidohydrolase 2B) (Putative inactive non-lysosomal ceramidase B)	ASAH2B ASAH2L	Homo sapiens (Human)	165
P0C7U2	ASA2C_HUMAN	reviewed	Putative neutral ceramidase C (EC 3.5.1.23) (N-acylsphingosine amidohydrolase 2C) (Non-lysosomal ceramidase C)	ASAH2C	Homo sapiens (Human)	622
Q13510	ASAH1_HUMAN	reviewed	Acid ceramidase (AC) (ACDase) (Acid CDase) (EC 3.5.1.23) (Acylsphingosine deacylase) (N-acylsphingosine amidohydrolase) (Putative 32 kDa heart protein) (PHP32) [Cleaved into: Acid ceramidase subunit alpha; Acid ceramidase subunit beta]	ASAH1 ASAH HSD-33 HSD33	Homo sapiens (Human)	395
Q9NR71	ASAH2_HUMAN	reviewed	Neutral ceramidase (N-CDase) (NCDase) (EC 3.5.1.23) (Acylsphingosine deacylase 2) (BCDase) (LCDase) (hCD) (N-acylsphingosine amidohydrolase 2) (Non-lysosomal ceramidase) [Cleaved into: Neutral ceramidase soluble form]	ASAH2 HNAC1	Homo sapiens (Human)	780
Q9ULH1	ASAP1_HUMAN	reviewed	Arf-GAP with SH3 domain, ANK repeat and PH domain-containing protein 1 (130 kDa phosphatidylinositol 4,5-bisphosphate-dependent ARF1 GTPase-activating protein) (ADP-ribosylation factor-directed GTPase-activating protein 1) (ARF GTPase-activating protein 1) (Development and differentiation-enhancing factor 1) (DEF-1) (Differentiation-enhancing factor 1) (PIP2-dependent ARF1 GAP)	ASAP1 DDEF1 KIAA1249	Homo sapiens (Human)	1129
O43150	ASAP2_HUMAN	reviewed	Arf-GAP with SH3 domain, ANK repeat and PH domain-containing protein 2 (Development and differentiation-enhancing factor 2) (Paxillin-associated protein with ARF GAP activity 3) (PAG3) (Pyk2 C-terminus-associated protein) (PAP)	ASAP2 DDEF2 KIAA0400	Homo sapiens (Human)	1006
Q8TDY4	ASAP3_HUMAN	reviewed	Arf-GAP with SH3 domain, ANK repeat and PH domain-containing protein 3 (Development and differentiation-enhancing factor-like 1) (Protein up-regulated in liver cancer 1)	ASAP3 DDEFL1 UPLC1	Homo sapiens (Human)	903
Q495Z4	ASAS1_HUMAN	reviewed	Putative uncharacterized protein ASB16-AS1 (ASB16 antisense RNA 1) (ASB16 antisense gene protein 1)	ASB16-AS1 C17orf65	Homo sapiens (Human)	193
Q8WXI3	ASB10_HUMAN	reviewed	Ankyrin repeat and SOCS box protein 10 (ASB-10)	ASB10	Homo sapiens (Human)	467
Q8WXH4	ASB11_HUMAN	reviewed	Ankyrin repeat and SOCS box protein 11 (ASB-11)	ASB11	Homo sapiens (Human)	323
Q8WXK4	ASB12_HUMAN	reviewed	Ankyrin repeat and SOCS box protein 12 (ASB-12)	ASB12	Homo sapiens (Human)	309
Q8WXK3	ASB13_HUMAN	reviewed	Ankyrin repeat and SOCS box protein 13 (ASB-13)	ASB13	Homo sapiens (Human)	278
A6NK59	ASB14_HUMAN	reviewed	Ankyrin repeat and SOCS box protein 14 (ASB-14)	ASB14	Homo sapiens (Human)	587
Q8WXK1	ASB15_HUMAN	reviewed	Ankyrin repeat and SOCS box protein 15 (ASB-15)	ASB15	Homo sapiens (Human)	588
Q96NS5	ASB16_HUMAN	reviewed	Ankyrin repeat and SOCS box protein 16 (ASB-16)	ASB16	Homo sapiens (Human)	453
Q8WXJ9	ASB17_HUMAN	reviewed	Ankyrin repeat and SOCS box protein 17 (ASB-17)	ASB17	Homo sapiens (Human)	295
Q6ZVZ8	ASB18_HUMAN	reviewed	Ankyrin repeat and SOCS box protein 18 (ASB-18)	ASB18	Homo sapiens (Human)	466
Q9Y576	ASB1_HUMAN	reviewed	Ankyrin repeat and SOCS box protein 1 (ASB-1)	ASB1 KIAA1146	Homo sapiens (Human)	335
Q96Q27	ASB2_HUMAN	reviewed	Ankyrin repeat and SOCS box protein 2 (ASB-2)	ASB2	Homo sapiens (Human)	587
Q9Y575	ASB3_HUMAN	reviewed	Ankyrin repeat and SOCS box protein 3 (ASB-3)	ASB3	Homo sapiens (Human)	518
Q9Y574	ASB4_HUMAN	reviewed	Ankyrin repeat and SOCS box protein 4 (ASB-4)	ASB4	Homo sapiens (Human)	426
Q8WWX0	ASB5_HUMAN	reviewed	Ankyrin repeat and SOCS box protein 5 (ASB-5)	ASB5	Homo sapiens (Human)	329
Q9NWX5	ASB6_HUMAN	reviewed	Ankyrin repeat and SOCS box protein 6 (ASB-6)	ASB6	Homo sapiens (Human)	421
Q9H672	ASB7_HUMAN	reviewed	Ankyrin repeat and SOCS box protein 7 (ASB-7)	ASB7	Homo sapiens (Human)	318
Q9H765	ASB8_HUMAN	reviewed	Ankyrin repeat and SOCS box protein 8 (ASB-8)	ASB8 PP14212	Homo sapiens (Human)	288
Q96DX5	ASB9_HUMAN	reviewed	Ankyrin repeat and SOCS box protein 9 (ASB-9)	ASB9	Homo sapiens (Human)	294
Q8N9N2	ASCC1_HUMAN	reviewed	Activating signal cointegrator 1 complex subunit 1 (ASC-1 complex subunit p50) (Trip4 complex subunit p50)	ASCC1 CGI-18	Homo sapiens (Human)	400
Q9H1I8	ASCC2_HUMAN	reviewed	Activating signal cointegrator 1 complex subunit 2 (ASC-1 complex subunit p100) (Trip4 complex subunit p100)	ASCC2 ASC1P100	Homo sapiens (Human)	757
Q8N3C0	ASCC3_HUMAN	reviewed	Activating signal cointegrator 1 complex subunit 3 (EC 3.6.4.12) (ASC-1 complex subunit p200) (ASC1p200) (Helicase, ATP binding 1) (Trip4 complex subunit p200)	ASCC3 HELIC1	Homo sapiens (Human)	2202
P50553	ASCL1_HUMAN	reviewed	Achaete-scute homolog 1 (ASH-1) (hASH1) (Class A basic helix-loop-helix protein 46) (bHLHa46)	ASCL1 ASH1 BHLHA46 HASH1	Homo sapiens (Human)	236
Q99929	ASCL2_HUMAN	reviewed	Achaete-scute homolog 2 (ASH-2) (hASH2) (Class A basic helix-loop-helix protein 45) (bHLHa45) (Mash2)	ASCL2 BHLHA45 HASH2	Homo sapiens (Human)	193
Q9NQ33	ASCL3_HUMAN	reviewed	Achaete-scute homolog 3 (ASH-3) (hASH3) (Class A basic helix-loop-helix protein 42) (bHLHa42) (bHLH transcriptional regulator Sgn-1)	ASCL3 BHLHA42 HASH3 SGN1	Homo sapiens (Human)	180
Q6XD76	ASCL4_HUMAN	reviewed	Achaete-scute homolog 4 (ASH-4) (hASH4) (Achaete-scute-like protein 4) (Class A basic helix-loop-helix protein 44) (bHLHa44)	ASCL4 BHLHA44 HASH4	Homo sapiens (Human)	172
Q7RTU5	ASCL5_HUMAN	reviewed	Achaete-scute homolog 5 (ASH-5) (hASH5) (Class A basic helix-loop-helix protein 47) (bHLHa47)	ASCL5 BHLHA47	Homo sapiens (Human)	278
Q9ULZ3	ASC_HUMAN	reviewed	Apoptosis-associated speck-like protein containing a CARD (hASC) (Caspase recruitment domain-containing protein 5) (PYD and CARD domain-containing protein) (Target of methylation-induced silencing 1)	PYCARD ASC CARD5 TMS1	Homo sapiens (Human)	195
Q9Y294	ASF1A_HUMAN	reviewed	Histone chaperone ASF1A (Anti-silencing function protein 1 homolog A) (hAsf1) (hAsf1a) (CCG1-interacting factor A) (CIA) (hCIA)	ASF1A CGI-98 HSPC146	Homo sapiens (Human)	204
Q9NVP2	ASF1B_HUMAN	reviewed	Histone chaperone ASF1B (Anti-silencing function protein 1 homolog B) (hAsf1) (hAsf1b) (CCG1-interacting factor A-II) (CIA-II) (hCIA-II)	ASF1B	Homo sapiens (Human)	202
Q7L266	ASGL1_HUMAN	reviewed	Isoaspartyl peptidase/L-asparaginase (EC 3.4.19.5) (EC 3.5.1.1) (Asparaginase-like protein 1) (Beta-aspartyl-peptidase) (Isoaspartyl dipeptidase) (L-asparagine amidohydrolase) [Cleaved into: Isoaspartyl peptidase/L-asparaginase alpha chain; Isoaspartyl peptidase/L-asparaginase beta chain]	ASRGL1 ALP CRASH	Homo sapiens (Human)	308
P07306	ASGR1_HUMAN	reviewed	Asialoglycoprotein receptor 1 (ASGP-R 1) (ASGPR 1) (C-type lectin domain family 4 member H1) (Hepatic lectin H1) (HL-1)	ASGR1 CLEC4H1	Homo sapiens (Human)	291
P07307	ASGR2_HUMAN	reviewed	Asialoglycoprotein receptor 2 (ASGP-R 2) (ASGPR 2) (C-type lectin domain family 4 member H2) (Hepatic lectin H2) (HL-2)	ASGR2 CLEC4H2	Homo sapiens (Human)	311
Q9NR48	ASH1L_HUMAN	reviewed	Histone-lysine N-methyltransferase ASH1L (EC 2.1.1.43) (ASH1-like protein) (huASH1) (Absent small and homeotic disks protein 1 homolog) (Lysine N-methyltransferase 2H)	ASH1L KIAA1420 KMT2H	Homo sapiens (Human)	2969
Q9UBL3	ASH2L_HUMAN	reviewed	Set1/Ash2 histone methyltransferase complex subunit ASH2 (ASH2-like protein)	ASH2L ASH2L1	Homo sapiens (Human)	628
Q9BVC5	ASHWN_HUMAN	reviewed	Ashwin	C2orf49	Homo sapiens (Human)	232
P78348	ASIC1_HUMAN	reviewed	Acid-sensing ion channel 1 (ASIC1) (Amiloride-sensitive cation channel 2, neuronal) (Brain sodium channel 2) (BNaC2)	ASIC1 ACCN2 BNAC2	Homo sapiens (Human)	528
Q16515	ASIC2_HUMAN	reviewed	Acid-sensing ion channel 2 (ASIC2) (Amiloride-sensitive brain sodium channel) (Amiloride-sensitive cation channel 1, neuronal) (Amiloride-sensitive cation channel neuronal 1) (Brain sodium channel 1) (BNC1) (BNaC1) (Mammalian degenerin homolog)	ASIC2 ACCN ACCN1 BNAC1 MDEG	Homo sapiens (Human)	512
Q9UHC3	ASIC3_HUMAN	reviewed	Acid-sensing ion channel 3 (ASIC3) (hASIC3) (Amiloride-sensitive cation channel 3) (Neuronal amiloride-sensitive cation channel 3) (Testis sodium channel 1) (hTNaC1)	ASIC3 ACCN3 SLNAC1 TNAC1	Homo sapiens (Human)	531
Q96FT7	ASIC4_HUMAN	reviewed	Acid-sensing ion channel 4 (ASIC4) (Amiloride-sensitive cation channel 4) (Amiloride-sensitive cation channel 4, pituitary)	ASIC4 ACCN4	Homo sapiens (Human)	647
Q9NY37	ASIC5_HUMAN	reviewed	Acid-sensing ion channel 5 (ASIC5) (Amiloride-sensitive cation channel 5) (Human intestine Na(+) channel) (HINaC)	ASIC5 ACCN5 HINAC	Homo sapiens (Human)	505
P42127	ASIP_HUMAN	reviewed	Agouti-signaling protein (ASP) (Agouti switch protein)	ASIP AGTI AGTIL ASP	Homo sapiens (Human)	132
Q92484	ASM3A_HUMAN	reviewed	Acid sphingomyelinase-like phosphodiesterase 3a (ASM-like phosphodiesterase 3a) (EC 3.1.4.-)	SMPDL3A ASML3A	Homo sapiens (Human)	453
Q92485	ASM3B_HUMAN	reviewed	Acid sphingomyelinase-like phosphodiesterase 3b (ASM-like phosphodiesterase 3b) (EC 3.1.4.-)	SMPDL3B ASML3B	Homo sapiens (Human)	455
O95671	ASML_HUMAN	reviewed	N-acetylserotonin O-methyltransferase-like protein (ASMTL)	ASMTL	Homo sapiens (Human)	621
P46597	ASMT_HUMAN	reviewed	Acetylserotonin O-methyltransferase (EC 2.1.1.4) (Hydroxyindole O-methyltransferase) (HIOMT)	ASMT	Homo sapiens (Human)	345
P17405	ASM_HUMAN	reviewed	Sphingomyelin phosphodiesterase (EC 3.1.4.12) (Acid sphingomyelinase) (aSMase)	SMPD1 ASM	Homo sapiens (Human)	629
O43681	ASNA_HUMAN	reviewed	ATPase ASNA1 (EC 3.6.-.-) (Arsenical pump-driving ATPase) (Arsenite-stimulated ATPase) (Transmembrane domain recognition complex 40 kDa ATPase subunit) (hARSA-I) (hASNA-I)	ASNA1 ARSA TRC40	Homo sapiens (Human)	348
Q9NWL6	ASND1_HUMAN	reviewed	Asparagine synthetase domain-containing protein 1 (HCV NS3-transactivated protein 1)	ASNSD1 NS3TP1 Nbla00058	Homo sapiens (Human)	643
P08243	ASNS_HUMAN	reviewed	Asparagine synthetase [glutamine-hydrolyzing] (EC 6.3.5.4) (Cell cycle control protein TS11) (Glutamine-dependent asparagine synthetase)	ASNS TS11	Homo sapiens (Human)	561
Q9BZE9	ASPC1_HUMAN	reviewed	Tether containing UBX domain for GLUT4 (Alveolar soft part sarcoma chromosomal region candidate gene 1 protein) (Alveolar soft part sarcoma locus) (Renal papillary cell carcinoma protein 17) (UBX domain-containing protein 9)	ASPSCR1 ASPL RCC17 TUG UBXD9 UBXN9	Homo sapiens (Human)	553
A6ND91	ASPD_HUMAN	reviewed	Putative L-aspartate dehydrogenase (EC 1.4.1.21) (Aspartate dehydrogenase domain-containing protein)	ASPDH	Homo sapiens (Human)	283
P20933	ASPG_HUMAN	reviewed	N(4)-(beta-N-acetylglucosaminyl)-L-asparaginase (EC 3.5.1.26) (Aspartylglucosaminidase) (Glycosylasparaginase) (N4-(N-acetyl-beta-glucosaminyl)-L-asparagine amidase) [Cleaved into: Glycosylasparaginase alpha chain; Glycosylasparaginase beta chain]	AGA	Homo sapiens (Human)	346
Q5U4P2	ASPH1_HUMAN	reviewed	Aspartate beta-hydroxylase domain-containing protein 1 (EC 1.14.11.-)	ASPHD1	Homo sapiens (Human)	390
Q6ICH7	ASPH2_HUMAN	reviewed	Aspartate beta-hydroxylase domain-containing protein 2 (EC 1.14.11.-)	ASPHD2	Homo sapiens (Human)	369
Q12797	ASPH_HUMAN	reviewed	Aspartyl/asparaginyl beta-hydroxylase (EC 1.14.11.16) (Aspartate beta-hydroxylase) (ASP beta-hydroxylase) (Peptide-aspartate beta-dioxygenase)	ASPH	Homo sapiens (Human)	758
Q8IZT6	ASPM_HUMAN	reviewed	Abnormal spindle-like microcephaly-associated protein (Abnormal spindle protein homolog) (Asp homolog)	ASPM MCPH5	Homo sapiens (Human)	3477
Q9BXN1	ASPN_HUMAN	reviewed	Asporin (Periodontal ligament-associated protein 1) (PLAP-1)	ASPN PLAP1 SLRR1C UNQ215/PRO241	Homo sapiens (Human)	380
Q96KQ4	ASPP1_HUMAN	reviewed	Apoptosis-stimulating of p53 protein 1 (Protein phosphatase 1 regulatory subunit 13B)	PPP1R13B ASPP1 KIAA0771	Homo sapiens (Human)	1090
Q13625	ASPP2_HUMAN	reviewed	Apoptosis-stimulating of p53 protein 2 (Bcl2-binding protein) (Bbp) (Renal carcinoma antigen NY-REN-51) (Tumor suppressor p53-binding protein 2) (53BP2) (p53-binding protein 2) (p53BP2)	TP53BP2 ASPP2 BBP	Homo sapiens (Human)	1128
P26436	ASPX_HUMAN	reviewed	Acrosomal protein SP-10 (Acrosomal vesicle protein 1)	ACRV1	Homo sapiens (Human)	265
P00966	ASSY_HUMAN	reviewed	Argininosuccinate synthase (EC 6.3.4.5) (Citrulline--aspartate ligase)	ASS1 ASS	Homo sapiens (Human)	412
Q2TB18	ASTE1_HUMAN	reviewed	Protein asteroid homolog 1	ASTE1 HT001	Homo sapiens (Human)	679
Q9Y284	ASTER_HUMAN	reviewed	Protein Asterix (WD repeat domain 83 opposite strand) (WDR83 opposite strand)	WDR83OS C19orf56 CGI-140 My006 PTD008	Homo sapiens (Human)	106
Q6HA08	ASTL_HUMAN	reviewed	Astacin-like metalloendopeptidase (EC 3.4.-.-) (Oocyte astacin) (Ovastacin)	ASTL	Homo sapiens (Human)	431
O14525	ASTN1_HUMAN	reviewed	Astrotactin-1	ASTN1 ASTN KIAA0289	Homo sapiens (Human)	1302
O75129	ASTN2_HUMAN	reviewed	Astrotactin-2	ASTN2 KIAA0634	Homo sapiens (Human)	1339
Q9NVM9	ASUN_HUMAN	reviewed	Protein asunder homolog (Cell cycle regulator Mat89Bb homolog) (Germ cell tumor 1) (Sarcoma antigen NY-SAR-95)	ASUN C12orf11 GCT1	Homo sapiens (Human)	706
Q8IXJ9	ASXL1_HUMAN	reviewed	Putative Polycomb group protein ASXL1 (Additional sex combs-like protein 1)	ASXL1 KIAA0978	Homo sapiens (Human)	1541
Q76L83	ASXL2_HUMAN	reviewed	Putative Polycomb group protein ASXL2 (Additional sex combs-like protein 2)	ASXL2 ASXH2 KIAA1685	Homo sapiens (Human)	1435
Q9C0F0	ASXL3_HUMAN	reviewed	Putative Polycomb group protein ASXL3 (Additional sex combs-like protein 3)	ASXL3 KIAA1713	Homo sapiens (Human)	2248
Q8WWH4	ASZ1_HUMAN	reviewed	Ankyrin repeat, SAM and basic leucine zipper domain-containing protein 1 (Ankyrin-like protein 1) (Germ cell-specific ankyrin, SAM and basic leucine zipper domain-containing protein)	ASZ1 ALP1 ANKL1 C7orf7 GASZ	Homo sapiens (Human)	475
O60312	AT10A_HUMAN	reviewed	Probable phospholipid-transporting ATPase VA (EC 3.6.3.1) (ATPase class V type 10A) (Aminophospholipid translocase VA)	ATP10A ATP10C ATPVA ATPVC KIAA0566	Homo sapiens (Human)	1499
O94823	AT10B_HUMAN	reviewed	Probable phospholipid-transporting ATPase VB (EC 3.6.3.1) (ATPase class V type 10B)	ATP10B ATPVB KIAA0715	Homo sapiens (Human)	1461
Q9P241	AT10D_HUMAN	reviewed	Probable phospholipid-transporting ATPase VD (EC 3.6.3.1) (ATPase class V type 10D)	ATP10D ATPVD KIAA1487	Homo sapiens (Human)	1426
P98196	AT11A_HUMAN	reviewed	Probable phospholipid-transporting ATPase IH (EC 3.6.3.1) (ATPase IS) (ATPase class VI type 11A)	ATP11A ATPIH ATPIS KIAA1021	Homo sapiens (Human)	1134
Q9Y2G3	AT11B_HUMAN	reviewed	Probable phospholipid-transporting ATPase IF (EC 3.6.3.1) (ATPase IR) (ATPase class VI type 11B)	ATP11B ATPIF ATPIR KIAA0956	Homo sapiens (Human)	1177
Q8NB49	AT11C_HUMAN	reviewed	Probable phospholipid-transporting ATPase IG (EC 3.6.3.1) (ATPase IQ) (ATPase class VI type 11C)	ATP11C ATPIG ATPIQ	Homo sapiens (Human)	1132
P54707	AT12A_HUMAN	reviewed	Potassium-transporting ATPase alpha chain 2 (EC 3.6.3.10) (Non-gastric H(+)/K(+) ATPase subunit alpha) (Proton pump)	ATP12A ATP1AL1	Homo sapiens (Human)	1039
Q9HD20	AT131_HUMAN	reviewed	Probable cation-transporting ATPase 13A1 (EC 3.6.3.-)	ATP13A1 ATP13A KIAA1825 CGI-152	Homo sapiens (Human)	1204
Q9NQ11	AT132_HUMAN	reviewed	Probable cation-transporting ATPase 13A2 (EC 3.6.3.-)	ATP13A2 PARK9	Homo sapiens (Human)	1180
Q9H7F0	AT133_HUMAN	reviewed	Probable cation-transporting ATPase 13A3 (EC 3.6.3.-) (ATPase family homolog up-regulated in senescence cells 1)	ATP13A3 AFURS1	Homo sapiens (Human)	1226
Q4VNC1	AT134_HUMAN	reviewed	Probable cation-transporting ATPase 13A4 (EC 3.6.3.-) (P5-ATPase isoform 4)	ATP13A4 UNQ3052/PRO9871	Homo sapiens (Human)	1196
Q4VNC0	AT135_HUMAN	reviewed	Probable cation-transporting ATPase 13A5 (EC 3.6.3.-) (P5-ATPase isoform 5)	ATP13A5 UNQ488/PRO1004	Homo sapiens (Human)	1218
P05023	AT1A1_HUMAN	reviewed	Sodium/potassium-transporting ATPase subunit alpha-1 (Na(+)/K(+) ATPase alpha-1 subunit) (EC 3.6.3.9) (Sodium pump subunit alpha-1)	ATP1A1	Homo sapiens (Human)	1023
P50993	AT1A2_HUMAN	reviewed	Sodium/potassium-transporting ATPase subunit alpha-2 (Na(+)/K(+) ATPase alpha-2 subunit) (EC 3.6.3.9) (Sodium pump subunit alpha-2)	ATP1A2 KIAA0778	Homo sapiens (Human)	1020
P13637	AT1A3_HUMAN	reviewed	Sodium/potassium-transporting ATPase subunit alpha-3 (Na(+)/K(+) ATPase alpha-3 subunit) (EC 3.6.3.9) (Na(+)/K(+) ATPase alpha(III) subunit) (Sodium pump subunit alpha-3)	ATP1A3	Homo sapiens (Human)	1013
Q13733	AT1A4_HUMAN	reviewed	Sodium/potassium-transporting ATPase subunit alpha-4 (Na(+)/K(+) ATPase alpha-4 subunit) (EC 3.6.3.9) (Sodium pump subunit alpha-4)	ATP1A4 ATP1AL2	Homo sapiens (Human)	1029
P05026	AT1B1_HUMAN	reviewed	Sodium/potassium-transporting ATPase subunit beta-1 (Sodium/potassium-dependent ATPase subunit beta-1)	ATP1B1 ATP1B	Homo sapiens (Human)	303
P14415	AT1B2_HUMAN	reviewed	Sodium/potassium-transporting ATPase subunit beta-2 (Adhesion molecule in glia) (AMOG) (Sodium/potassium-dependent ATPase subunit beta-2)	ATP1B2	Homo sapiens (Human)	290
P54709	AT1B3_HUMAN	reviewed	Sodium/potassium-transporting ATPase subunit beta-3 (Sodium/potassium-dependent ATPase subunit beta-3) (ATPB-3) (CD antigen CD298)	ATP1B3	Homo sapiens (Human)	279
Q9UN42	AT1B4_HUMAN	reviewed	Protein ATP1B4 (X,K-ATPase subunit beta-m) (X/potassium-transporting ATPase subunit beta-m)	ATP1B4	Homo sapiens (Human)	357
O14983	AT2A1_HUMAN	reviewed	Sarcoplasmic/endoplasmic reticulum calcium ATPase 1 (SERCA1) (SR Ca(2+)-ATPase 1) (EC 3.6.3.8) (Calcium pump 1) (Calcium-transporting ATPase sarcoplasmic reticulum type, fast twitch skeletal muscle isoform) (Endoplasmic reticulum class 1/2 Ca(2+) ATPase)	ATP2A1	Homo sapiens (Human)	1001
P16615	AT2A2_HUMAN	reviewed	Sarcoplasmic/endoplasmic reticulum calcium ATPase 2 (SERCA2) (SR Ca(2+)-ATPase 2) (EC 3.6.3.8) (Calcium pump 2) (Calcium-transporting ATPase sarcoplasmic reticulum type, slow twitch skeletal muscle isoform) (Endoplasmic reticulum class 1/2 Ca(2+) ATPase)	ATP2A2 ATP2B	Homo sapiens (Human)	1042
Q93084	AT2A3_HUMAN	reviewed	Sarcoplasmic/endoplasmic reticulum calcium ATPase 3 (SERCA3) (SR Ca(2+)-ATPase 3) (EC 3.6.3.8) (Calcium pump 3)	ATP2A3	Homo sapiens (Human)	1043
P20020	AT2B1_HUMAN	reviewed	Plasma membrane calcium-transporting ATPase 1 (PMCA1) (EC 3.6.3.8) (Plasma membrane calcium ATPase isoform 1) (Plasma membrane calcium pump isoform 1)	ATP2B1 PMCA1	Homo sapiens (Human)	1258
Q01814	AT2B2_HUMAN	reviewed	Plasma membrane calcium-transporting ATPase 2 (PMCA2) (EC 3.6.3.8) (Plasma membrane calcium ATPase isoform 2) (Plasma membrane calcium pump isoform 2)	ATP2B2 PMCA2	Homo sapiens (Human)	1243
Q16720	AT2B3_HUMAN	reviewed	Plasma membrane calcium-transporting ATPase 3 (PMCA3) (EC 3.6.3.8) (Plasma membrane calcium ATPase isoform 3) (Plasma membrane calcium pump isoform 3)	ATP2B3	Homo sapiens (Human)	1220
P23634	AT2B4_HUMAN	reviewed	Plasma membrane calcium-transporting ATPase 4 (PMCA4) (EC 3.6.3.8) (Matrix-remodeling-associated protein 1) (Plasma membrane calcium ATPase isoform 4) (Plasma membrane calcium pump isoform 4)	ATP2B4 ATP2B2 MXRA1	Homo sapiens (Human)	1241
P98194	AT2C1_HUMAN	reviewed	Calcium-transporting ATPase type 2C member 1 (ATPase 2C1) (EC 3.6.3.8) (ATP-dependent Ca(2+) pump PMR1)	ATP2C1 KIAA1347 PMR1L HUSSY-28	Homo sapiens (Human)	919
O75185	AT2C2_HUMAN	reviewed	Calcium-transporting ATPase type 2C member 2 (ATPase 2C2) (EC 3.6.3.8) (Secretory pathway Ca(2+)-ATPase 2)	ATP2C2 KIAA0703 SPCA2	Homo sapiens (Human)	946
Q8TBG4	AT2L1_HUMAN	reviewed	Ethanolamine-phosphate phospho-lyase (EC 4.2.3.2) (Alanine--glyoxylate aminotransferase 2-like 1)	AGXT2L1	Homo sapiens (Human)	499
Q8IUZ5	AT2L2_HUMAN	reviewed	5-phosphohydroxy-L-lysine phospho-lyase (EC 4.2.3.134) (Alanine--glyoxylate aminotransferase 2-like 2)	AGXT2L2 PP9286	Homo sapiens (Human)	450
Q5VTU8	AT5EL_HUMAN	reviewed	ATP synthase subunit epsilon-like protein, mitochondrial	ATP5EP2	Homo sapiens (Human)	51
P24539	AT5F1_HUMAN	reviewed	ATP synthase subunit b, mitochondrial (ATPase subunit b)	ATP5F1	Homo sapiens (Human)	256
P05496	AT5G1_HUMAN	reviewed	ATP synthase lipid-binding protein, mitochondrial (ATP synthase proteolipid P1) (ATPase protein 9) (ATPase subunit c)	ATP5G1	Homo sapiens (Human)	136
Q06055	AT5G2_HUMAN	reviewed	ATP synthase lipid-binding protein, mitochondrial (ATP synthase proteolipid P2) (ATPase protein 9) (ATPase subunit c)	ATP5G2 PSEC0033	Homo sapiens (Human)	141
P48201	AT5G3_HUMAN	reviewed	ATP synthase lipid-binding protein, mitochondrial (ATP synthase proteolipid P3) (ATPase protein 9) (ATPase subunit c)	ATP5G3	Homo sapiens (Human)	142
Q7Z4Y8	AT5L2_HUMAN	reviewed	ATP synthase subunit g 2, mitochondrial (ATPase subunit g 2)	ATP5L2 ATP5K2	Homo sapiens (Human)	100
Q9NW81	AT5SL_HUMAN	reviewed	ATP synthase subunit s-like protein	ATP5SL	Homo sapiens (Human)	257
Q9ULK2	AT7L1_HUMAN	reviewed	Ataxin-7-like protein 1 (Ataxin-7-like protein 4)	ATXN7L1 ATXN7L4 KIAA1218	Homo sapiens (Human)	861
Q5T6C5	AT7L2_HUMAN	reviewed	Ataxin-7-like protein 2	ATXN7L2	Homo sapiens (Human)	722
Q14CW9	AT7L3_HUMAN	reviewed	Ataxin-7-like protein 3 (SAGA-associated factor 11 homolog)	ATXN7L3	Homo sapiens (Human)	347
Q9Y2Q0	AT8A1_HUMAN	reviewed	Probable phospholipid-transporting ATPase IA (EC 3.6.3.1) (ATPase class I type 8A member 1) (Chromaffin granule ATPase II)	ATP8A1 ATPIA	Homo sapiens (Human)	1164
Q9NTI2	AT8A2_HUMAN	reviewed	Probable phospholipid-transporting ATPase IB (EC 3.6.3.1) (ATPase class I type 8A member 2) (ML-1)	ATP8A2 ATPIB	Homo sapiens (Human)	1148
O43520	AT8B1_HUMAN	reviewed	Probable phospholipid-transporting ATPase IC (EC 3.6.3.1) (ATPase class I type 8B member 1) (Familial intrahepatic cholestasis type 1)	ATP8B1 ATPIC FIC1 PFIC	Homo sapiens (Human)	1251
P98198	AT8B2_HUMAN	reviewed	Probable phospholipid-transporting ATPase ID (EC 3.6.3.1) (ATPase class I type 8B member 2)	ATP8B2 ATPID KIAA1137	Homo sapiens (Human)	1209
O60423	AT8B3_HUMAN	reviewed	Probable phospholipid-transporting ATPase IK (EC 3.6.3.1) (ATPase class I type 8B member 3)	ATP8B3 ATP1K FOS37502_2	Homo sapiens (Human)	1300
Q8TF62	AT8B4_HUMAN	reviewed	Probable phospholipid-transporting ATPase IM (EC 3.6.3.1) (ATPase class I type 8B member 4)	ATP8B4 KIAA1939	Homo sapiens (Human)	1192
Q8NBU5	ATAD1_HUMAN	reviewed	ATPase family AAA domain-containing protein 1 (EC 3.6.1.3) (Thorase)	ATAD1 FNP001	Homo sapiens (Human)	361
Q6PL18	ATAD2_HUMAN	reviewed	ATPase family AAA domain-containing protein 2 (EC 3.6.1.3) (AAA nuclear coregulator cancer-associated protein) (ANCCA)	ATAD2 L16 PRO2000	Homo sapiens (Human)	1390
Q96QE3	ATAD5_HUMAN	reviewed	ATPase family AAA domain-containing protein 5 (Chromosome fragility-associated gene 1 protein)	ATAD5 C17orf41 FRAG1	Homo sapiens (Human)	1844
Q5SQI0	ATAT_HUMAN	reviewed	Alpha-tubulin N-acetyltransferase (Alpha-TAT) (TAT) (EC 2.3.1.108) (Acetyltransferase mec-17 homolog)	ATAT1 C6orf134 MEC17 Nbla00487	Homo sapiens (Human)	421
Q86WG3	ATCAY_HUMAN	reviewed	Caytaxin (Ataxia cayman type protein) (BNIP-2-homology) (BNIP-H)	ATCAY KIAA1872	Homo sapiens (Human)	371
Q9ULI0	ATD2B_HUMAN	reviewed	ATPase family AAA domain-containing protein 2B	ATAD2B KIAA1240	Homo sapiens (Human)	1458
Q9NVI7	ATD3A_HUMAN	reviewed	ATPase family AAA domain-containing protein 3A	ATAD3A	Homo sapiens (Human)	634
Q5T9A4	ATD3B_HUMAN	reviewed	ATPase family AAA domain-containing protein 3B (AAA-TOB3)	ATAD3B KIAA1273 TOB3	Homo sapiens (Human)	648
Q5T2N8	ATD3C_HUMAN	reviewed	ATPase family AAA domain-containing protein 3C	ATAD3C	Homo sapiens (Human)	411
O95260	ATE1_HUMAN	reviewed	Arginyl-tRNA--protein transferase 1 (Arginyltransferase 1) (R-transferase 1) (EC 2.3.2.8) (Arginine-tRNA--protein transferase 1)	ATE1	Homo sapiens (Human)	518
P18846	ATF1_HUMAN	reviewed	Cyclic AMP-dependent transcription factor ATF-1 (cAMP-dependent transcription factor ATF-1) (Activating transcription factor 1) (Protein TREB36)	ATF1	Homo sapiens (Human)	271
P15336	ATF2_HUMAN	reviewed	Cyclic AMP-dependent transcription factor ATF-2 (cAMP-dependent transcription factor ATF-2) (Activating transcription factor 2) (Cyclic AMP-responsive element-binding protein 2) (CREB-2) (cAMP-responsive element-binding protein 2) (HB16) (cAMP response element-binding protein CRE-BP1)	ATF2 CREB2 CREBP1	Homo sapiens (Human)	505
P18847	ATF3_HUMAN	reviewed	Cyclic AMP-dependent transcription factor ATF-3 (cAMP-dependent transcription factor ATF-3) (Activating transcription factor 3)	ATF3	Homo sapiens (Human)	181
P18848	ATF4_HUMAN	reviewed	Cyclic AMP-dependent transcription factor ATF-4 (cAMP-dependent transcription factor ATF-4) (Activating transcription factor 4) (Cyclic AMP-responsive element-binding protein 2) (CREB-2) (cAMP-responsive element-binding protein 2) (DNA-binding protein TAXREB67) (Tax-responsive enhancer element-binding protein 67) (TaxREB67)	ATF4 CREB2 TXREB	Homo sapiens (Human)	351
Q9Y2D1	ATF5_HUMAN	reviewed	Cyclic AMP-dependent transcription factor ATF-5 (cAMP-dependent transcription factor ATF-5) (Activating transcription factor 5) (Transcription factor ATFx)	ATF5 ATFX	Homo sapiens (Human)	282
P18850	ATF6A_HUMAN	reviewed	Cyclic AMP-dependent transcription factor ATF-6 alpha (cAMP-dependent transcription factor ATF-6 alpha) (Activating transcription factor 6 alpha) (ATF6-alpha) [Cleaved into: Processed cyclic AMP-dependent transcription factor ATF-6 alpha]	ATF6	Homo sapiens (Human)	670
Q99941	ATF6B_HUMAN	reviewed	Cyclic AMP-dependent transcription factor ATF-6 beta (cAMP-dependent transcription factor ATF-6 beta) (Activating transcription factor 6 beta) (ATF6-beta) (Protein G13) (cAMP response element-binding protein-related protein) (Creb-rp) (cAMP-responsive element-binding protein-like 1) [Cleaved into: Processed cyclic AMP-dependent transcription factor ATF-6 beta]	ATF6B CREBL1 G13	Homo sapiens (Human)	703
P17544	ATF7_HUMAN	reviewed	Cyclic AMP-dependent transcription factor ATF-7 (cAMP-dependent transcription factor ATF-7) (Activating transcription factor 7) (Transcription factor ATF-A)	ATF7 ATFA	Homo sapiens (Human)	494
Q9H0Y0	ATG10_HUMAN	reviewed	Ubiquitin-like-conjugating enzyme ATG10 (EC 6.3.2.-) (Autophagy-related protein 10) (APG10-like)	ATG10 APG10L PP12616	Homo sapiens (Human)	220
O94817	ATG12_HUMAN	reviewed	Ubiquitin-like protein ATG12 (Autophagy-related protein 12) (APG12-like)	ATG12 APG12 APG12L	Homo sapiens (Human)	140
O75143	ATG13_HUMAN	reviewed	Autophagy-related protein 13	ATG13 KIAA0652	Homo sapiens (Human)	517
Q2TAZ0	ATG2A_HUMAN	reviewed	Autophagy-related protein 2 homolog A	ATG2A KIAA0404	Homo sapiens (Human)	1938
Q96BY7	ATG2B_HUMAN	reviewed	Autophagy-related protein 2 homolog B	ATG2B C14orf103	Homo sapiens (Human)	2078
Q9NT62	ATG3_HUMAN	reviewed	Ubiquitin-like-conjugating enzyme ATG3 (EC 6.3.2.-) (Autophagy-related protein 3) (APG3-like) (hApg3) (Protein PC3-96)	ATG3 APG3 APG3L	Homo sapiens (Human)	314
Q8WYN0	ATG4A_HUMAN	reviewed	Cysteine protease ATG4A (EC 3.4.22.-) (AUT-like 2 cysteine endopeptidase) (Autophagin-2) (Autophagy-related cysteine endopeptidase 2) (Autophagy-related protein 4 homolog A) (hAPG4A)	ATG4A APG4A AUTL2	Homo sapiens (Human)	398
Q9Y4P1	ATG4B_HUMAN	reviewed	Cysteine protease ATG4B (EC 3.4.22.-) (AUT-like 1 cysteine endopeptidase) (Autophagin-1) (Autophagy-related cysteine endopeptidase 1) (Autophagy-related protein 4 homolog B) (hAPG4B)	ATG4B APG4B AUTL1 KIAA0943	Homo sapiens (Human)	393
Q96DT6	ATG4C_HUMAN	reviewed	Cysteine protease ATG4C (EC 3.4.22.-) (AUT-like 3 cysteine endopeptidase) (Autophagin-3) (Autophagy-related cysteine endopeptidase 3) (Autophagy-related protein 4 homolog C)	ATG4C APG4C AUTL1 AUTL3	Homo sapiens (Human)	458
Q86TL0	ATG4D_HUMAN	reviewed	Cysteine protease ATG4D (EC 3.4.22.-) (AUT-like 4 cysteine endopeptidase) (Autophagin-4) (Autophagy-related cysteine endopeptidase 4) (Autophagy-related protein 4 homolog D)	ATG4D APG4D AUTL4	Homo sapiens (Human)	474
Q9H1Y0	ATG5_HUMAN	reviewed	Autophagy protein 5 (APG5-like) (Apoptosis-specific protein)	ATG5 APG5L ASP	Homo sapiens (Human)	275
O95352	ATG7_HUMAN	reviewed	Ubiquitin-like modifier-activating enzyme ATG7 (ATG12-activating enzyme E1 ATG7) (Autophagy-related protein 7) (APG7-like) (hAGP7) (Ubiquitin-activating enzyme E1-like protein)	ATG7 APG7L	Homo sapiens (Human)	703
Q7Z3C6	ATG9A_HUMAN	reviewed	Autophagy-related protein 9A (APG9-like 1) (mATG9)	ATG9A APG9L1	Homo sapiens (Human)	839
Q674R7	ATG9B_HUMAN	reviewed	Autophagy-related protein 9B (APG9-like 2) (Nitric oxide synthase 3-overlapping antisense gene protein) (Protein sONE)	ATG9B APG9L2 NOS3AS	Homo sapiens (Human)	924
Q9BSB4	ATGA1_HUMAN	reviewed	Autophagy-related protein 101	ATG101 C12orf44 PP894	Homo sapiens (Human)	218
Q32M88	ATHL1_HUMAN	reviewed	Acid trehalase-like protein 1 (EC 3.2.1.-)	ATHL1	Homo sapiens (Human)	737
Q9UII2	ATIF1_HUMAN	reviewed	ATPase inhibitor, mitochondrial (Inhibitor of F(1)F(o)-ATPase) (IF(1)) (IF1)	ATPIF1 ATPI	Homo sapiens (Human)	106
Q8N6G6	ATL1_HUMAN	reviewed	ADAMTS-like protein 1 (ADAMTSL-1) (Punctin-1)	ADAMTSL1 ADAMTSR1 C9orf94 UNQ528/PRO1071	Homo sapiens (Human)	1762
Q86TH1	ATL2_HUMAN	reviewed	ADAMTS-like protein 2 (ADAMTSL-2)	ADAMTSL2 KIAA0605	Homo sapiens (Human)	951
P82987	ATL3_HUMAN	reviewed	ADAMTS-like protein 3 (ADAMTSL-3) (Punctin-2)	ADAMTSL3 KIAA1233	Homo sapiens (Human)	1691
Q6UY14	ATL4_HUMAN	reviewed	ADAMTS-like protein 4 (ADAMTSL-4) (Thrombospondin repeat-containing protein 1)	ADAMTSL4 TSRC1 PP1396 UNQ2803/PRO34012	Homo sapiens (Human)	1074
Q6ZMM2	ATL5_HUMAN	reviewed	ADAMTS-like protein 5 (ADAMTSL-5) (Thrombospondin type-1 domain-containing protein 6)	ADAMTSL5 THSD6	Homo sapiens (Human)	471
Q8WXF7	ATLA1_HUMAN	reviewed	Atlastin-1 (EC 3.6.5.-) (Brain-specific GTP-binding protein) (GTP-binding protein 3) (GBP-3) (hGBP3) (Guanine nucleotide-binding protein 3) (Spastic paraplegia 3 protein A)	ATL1 GBP3 SPG3A	Homo sapiens (Human)	558
Q8NHH9	ATLA2_HUMAN	reviewed	Atlastin-2 (EC 3.6.5.-) (ADP-ribosylation factor-like protein 6-interacting protein 2) (ARL-6-interacting protein 2) (Aip-2)	ATL2 ARL6IP2	Homo sapiens (Human)	583
Q6DD88	ATLA3_HUMAN	reviewed	Atlastin-3 (EC 3.6.5.-)	ATL3	Homo sapiens (Human)	541
O43313	ATMIN_HUMAN	reviewed	ATM interactor (ATM/ATR-substrate CHK2-interacting zinc finger protein) (ASCIZ) (Zinc finger protein 822)	ATMIN KIAA0431 ZNF822	Homo sapiens (Human)	823
Q13315	ATM_HUMAN	reviewed	Serine-protein kinase ATM (EC 2.7.11.1) (Ataxia telangiectasia mutated) (A-T mutated)	ATM	Homo sapiens (Human)	3056
P54259	ATN1_HUMAN	reviewed	Atrophin-1 (Dentatorubral-pallidoluysian atrophy protein)	ATN1 D12S755E DRPLA	Homo sapiens (Human)	1190
P54710	ATNG_HUMAN	reviewed	Sodium/potassium-transporting ATPase subunit gamma (Na(+)/K(+) ATPase subunit gamma) (FXYD domain-containing ion transport regulator 2) (Sodium pump gamma chain)	FXYD2 ATP1C ATP1G1	Homo sapiens (Human)	66
Q92858	ATOH1_HUMAN	reviewed	Protein atonal homolog 1 (Class A basic helix-loop-helix protein 14) (bHLHa14) (Helix-loop-helix protein hATH-1) (hATH1)	ATOH1 ATH1 BHLHA14	Homo sapiens (Human)	354
Q8N100	ATOH7_HUMAN	reviewed	Protein atonal homolog 7 (Class A basic helix-loop-helix protein 13) (bHLHa13) (Helix-loop-helix protein hATH-5) (hATH5)	ATOH7 ATH5 BHLHA13	Homo sapiens (Human)	152
Q96SQ7	ATOH8_HUMAN	reviewed	Protein atonal homolog 8 (Class A basic helix-loop-helix protein 21) (bHLHa21) (Helix-loop-helix protein hATH-6) (hATH6)	ATOH8 ATH6 BHLHA21	Homo sapiens (Human)	321
O00244	ATOX1_HUMAN	reviewed	Copper transport protein ATOX1 (Metal transport protein ATX1)	ATOX1 HAH1	Homo sapiens (Human)	68
Q9Y6H3	ATP23_HUMAN	reviewed	Mitochondrial inner membrane protease ATP23 homolog (EC 3.4.24.-) (Ku70-binding protein 3) (XRCC6-binding protein 1)	XRCC6BP1 KUB3	Homo sapiens (Human)	246
P20648	ATP4A_HUMAN	reviewed	Potassium-transporting ATPase alpha chain 1 (EC 3.6.3.10) (Gastric H(+)/K(+) ATPase subunit alpha) (Proton pump)	ATP4A	Homo sapiens (Human)	1035
P51164	ATP4B_HUMAN	reviewed	Potassium-transporting ATPase subunit beta (Gastric H(+)/K(+) ATPase subunit beta) (Proton pump beta chain)	ATP4B	Homo sapiens (Human)	291
P56381	ATP5E_HUMAN	reviewed	ATP synthase subunit epsilon, mitochondrial (ATPase subunit epsilon)	ATP5E	Homo sapiens (Human)	51
O75947	ATP5H_HUMAN	reviewed	ATP synthase subunit d, mitochondrial (ATPase subunit d)	ATP5H My032	Homo sapiens (Human)	161
P56385	ATP5I_HUMAN	reviewed	ATP synthase subunit e, mitochondrial (ATPase subunit e)	ATP5I ATP5K	Homo sapiens (Human)	69
P18859	ATP5J_HUMAN	reviewed	ATP synthase-coupling factor 6, mitochondrial (ATPase subunit F6)	ATP5J ATP5A ATPM	Homo sapiens (Human)	108
O75964	ATP5L_HUMAN	reviewed	ATP synthase subunit g, mitochondrial (ATPase subunit g)	ATP5L	Homo sapiens (Human)	103
Q99766	ATP5S_HUMAN	reviewed	ATP synthase subunit s, mitochondrial (ATP synthase-coupling factor B) (FB) (Mitochondrial ATP synthase regulatory component factor B)	ATP5S ATPW	Homo sapiens (Human)	215
P00846	ATP6_HUMAN	reviewed	ATP synthase subunit a (F-ATPase protein 6)	MT-ATP6 ATP6 ATPASE6 MTATP6	Homo sapiens (Human)	226
Q04656	ATP7A_HUMAN	reviewed	Copper-transporting ATPase 1 (EC 3.6.3.4) (Copper pump 1) (Menkes disease-associated protein)	ATP7A MC1 MNK	Homo sapiens (Human)	1500
P35670	ATP7B_HUMAN	reviewed	Copper-transporting ATPase 2 (EC 3.6.3.4) (Copper pump 2) (Wilson disease-associated protein) [Cleaved into: WND/140 kDa]	ATP7B PWD WC1 WND	Homo sapiens (Human)	1465
P03928	ATP8_HUMAN	reviewed	ATP synthase protein 8 (A6L) (F-ATPase subunit 8)	MT-ATP8 ATP8 ATPASE8 MTATP8	Homo sapiens (Human)	68
O75110	ATP9A_HUMAN	reviewed	Probable phospholipid-transporting ATPase IIA (EC 3.6.3.1) (ATPase class II type 9A)	ATP9A ATPIIA KIAA0611	Homo sapiens (Human)	1047
O43861	ATP9B_HUMAN	reviewed	Probable phospholipid-transporting ATPase IIB (EC 3.6.3.1) (ATPase class II type 9B)	ATP9B ATPIIB NEO1L HUSSY-20	Homo sapiens (Human)	1147
P25705	ATPA_HUMAN	reviewed	ATP synthase subunit alpha, mitochondrial	ATP5A1 ATP5A ATP5AL2 ATPM	Homo sapiens (Human)	553
P06576	ATPB_HUMAN	reviewed	ATP synthase subunit beta, mitochondrial (EC 3.6.3.14)	ATP5B ATPMB ATPSB	Homo sapiens (Human)	529
P30049	ATPD_HUMAN	reviewed	ATP synthase subunit delta, mitochondrial (F-ATPase delta subunit)	ATP5D	Homo sapiens (Human)	168
Q5TC12	ATPF1_HUMAN	reviewed	ATP synthase mitochondrial F1 complex assembly factor 1 (ATP11 homolog)	ATPAF1 ATP11	Homo sapiens (Human)	328
Q8N5M1	ATPF2_HUMAN	reviewed	ATP synthase mitochondrial F1 complex assembly factor 2 (ATP12 homolog)	ATPAF2 ATP12 LP3663	Homo sapiens (Human)	289
P36542	ATPG_HUMAN	reviewed	ATP synthase subunit gamma, mitochondrial (F-ATPase gamma subunit)	ATP5C1 ATP5C ATP5CL1	Homo sapiens (Human)	298
P56134	ATPK_HUMAN	reviewed	ATP synthase subunit f, mitochondrial	ATP5J2 ATP5JL	Homo sapiens (Human)	94
Q5TC04	ATPOS_HUMAN	reviewed	Putative uncharacterized protein ATP1A1OS (ATP1A1 opposite strand protein)	ATP1A1OS C1orf203	Homo sapiens (Human)	95
P48047	ATPO_HUMAN	reviewed	ATP synthase subunit O, mitochondrial (Oligomycin sensitivity conferral protein) (OSCP)	ATP5O ATPO	Homo sapiens (Human)	213
Q6RW13	ATRAP_HUMAN	reviewed	Type-1 angiotensin II receptor-associated protein (AT1 receptor-associated protein)	AGTRAP ATRAP	Homo sapiens (Human)	159
Q8WXE1	ATRIP_HUMAN	reviewed	ATR-interacting protein (ATM and Rad3-related-interacting protein)	ATRIP AGS1	Homo sapiens (Human)	791
Q5VV63	ATRN1_HUMAN	reviewed	Attractin-like protein 1	ATRNL1 KIAA0534	Homo sapiens (Human)	1379
O75882	ATRN_HUMAN	reviewed	Attractin (DPPT-L) (Mahogany homolog)	ATRN KIAA0548 MGCA	Homo sapiens (Human)	1429
P46100	ATRX_HUMAN	reviewed	Transcriptional regulator ATRX (EC 3.6.4.12) (ATP-dependent helicase ATRX) (X-linked helicase II) (X-linked nuclear protein) (XNP) (Znf-HX)	ATRX RAD54L XH2	Homo sapiens (Human)	2492
Q13535	ATR_HUMAN	reviewed	Serine/threonine-protein kinase ATR (EC 2.7.11.1) (Ataxia telangiectasia and Rad3-related protein) (FRAP-related protein 1)	ATR FRP1	Homo sapiens (Human)	2644
Q9H324	ATS10_HUMAN	reviewed	A disintegrin and metalloproteinase with thrombospondin motifs 10 (ADAM-TS 10) (ADAM-TS10) (ADAMTS-10) (EC 3.4.24.-)	ADAMTS10	Homo sapiens (Human)	1103
P58397	ATS12_HUMAN	reviewed	A disintegrin and metalloproteinase with thrombospondin motifs 12 (ADAM-TS 12) (ADAM-TS12) (ADAMTS-12) (EC 3.4.24.-)	ADAMTS12 UNQ1918/PRO4389	Homo sapiens (Human)	1594
Q76LX8	ATS13_HUMAN	reviewed	A disintegrin and metalloproteinase with thrombospondin motifs 13 (ADAM-TS 13) (ADAM-TS13) (ADAMTS-13) (EC 3.4.24.87) (von Willebrand factor-cleaving protease) (vWF-CP) (vWF-cleaving protease)	ADAMTS13 C9orf8 UNQ6102/PRO20085	Homo sapiens (Human)	1427
Q8WXS8	ATS14_HUMAN	reviewed	A disintegrin and metalloproteinase with thrombospondin motifs 14 (ADAM-TS 14) (ADAM-TS14) (ADAMTS-14) (EC 3.4.24.-)	ADAMTS14	Homo sapiens (Human)	1223
Q8TE58	ATS15_HUMAN	reviewed	A disintegrin and metalloproteinase with thrombospondin motifs 15 (ADAM-TS 15) (ADAM-TS15) (ADAMTS-15) (EC 3.4.24.-)	ADAMTS15	Homo sapiens (Human)	950
Q8TE57	ATS16_HUMAN	reviewed	A disintegrin and metalloproteinase with thrombospondin motifs 16 (ADAM-TS 16) (ADAM-TS16) (ADAMTS-16) (EC 3.4.24.-)	ADAMTS16 KIAA2029	Homo sapiens (Human)	1224
Q8TE56	ATS17_HUMAN	reviewed	A disintegrin and metalloproteinase with thrombospondin motifs 17 (ADAM-TS 17) (ADAM-TS17) (ADAMTS-17) (EC 3.4.24.-)	ADAMTS17	Homo sapiens (Human)	1095
Q8TE60	ATS18_HUMAN	reviewed	A disintegrin and metalloproteinase with thrombospondin motifs 18 (ADAM-TS 18) (ADAM-TS18) (ADAMTS-18) (EC 3.4.24.-)	ADAMTS18 ADAMTS21	Homo sapiens (Human)	1221
Q8TE59	ATS19_HUMAN	reviewed	A disintegrin and metalloproteinase with thrombospondin motifs 19 (ADAM-TS 19) (ADAM-TS19) (ADAMTS-19) (EC 3.4.24.-)	ADAMTS19	Homo sapiens (Human)	1207
Q9UHI8	ATS1_HUMAN	reviewed	A disintegrin and metalloproteinase with thrombospondin motifs 1 (ADAM-TS 1) (ADAM-TS1) (ADAMTS-1) (EC 3.4.24.-) (METH-1)	ADAMTS1 KIAA1346 METH1	Homo sapiens (Human)	967
P59510	ATS20_HUMAN	reviewed	A disintegrin and metalloproteinase with thrombospondin motifs 20 (ADAM-TS 20) (ADAM-TS20) (ADAMTS-20) (EC 3.4.24.-)	ADAMTS20	Homo sapiens (Human)	1910
O95450	ATS2_HUMAN	reviewed	A disintegrin and metalloproteinase with thrombospondin motifs 2 (ADAM-TS 2) (ADAM-TS2) (ADAMTS-2) (EC 3.4.24.14) (Procollagen I N-proteinase) (PC I-NP) (Procollagen I/II amino propeptide-processing enzyme) (Procollagen N-endopeptidase) (pNPI)	ADAMTS2 PCINP PCPNI	Homo sapiens (Human)	1211
O15072	ATS3_HUMAN	reviewed	A disintegrin and metalloproteinase with thrombospondin motifs 3 (ADAM-TS 3) (ADAM-TS3) (ADAMTS-3) (EC 3.4.24.-) (Procollagen II N-proteinase) (PC II-NP) (Procollagen II amino propeptide-processing enzyme)	ADAMTS3 KIAA0366	Homo sapiens (Human)	1205
O75173	ATS4_HUMAN	reviewed	A disintegrin and metalloproteinase with thrombospondin motifs 4 (ADAM-TS 4) (ADAM-TS4) (ADAMTS-4) (EC 3.4.24.82) (ADMP-1) (Aggrecanase-1)	ADAMTS4 KIAA0688 UNQ769/PRO1563	Homo sapiens (Human)	837
Q9UNA0	ATS5_HUMAN	reviewed	A disintegrin and metalloproteinase with thrombospondin motifs 5 (ADAM-TS 5) (ADAM-TS5) (ADAMTS-5) (EC 3.4.24.-) (A disintegrin and metalloproteinase with thrombospondin motifs 11) (ADAM-TS 11) (ADAMTS-11) (ADMP-2) (Aggrecanase-2)	ADAMTS5 ADAMTS11 ADMP2	Homo sapiens (Human)	930
Q9UKP5	ATS6_HUMAN	reviewed	A disintegrin and metalloproteinase with thrombospondin motifs 6 (ADAM-TS 6) (ADAM-TS6) (ADAMTS-6) (EC 3.4.24.-)	ADAMTS6	Homo sapiens (Human)	1117
Q9UKP4	ATS7_HUMAN	reviewed	A disintegrin and metalloproteinase with thrombospondin motifs 7 (ADAM-TS 7) (ADAM-TS7) (ADAMTS-7) (EC 3.4.24.-) (COMPase)	ADAMTS7	Homo sapiens (Human)	1686
Q9UP79	ATS8_HUMAN	reviewed	A disintegrin and metalloproteinase with thrombospondin motifs 8 (ADAM-TS 8) (ADAM-TS8) (ADAMTS-8) (EC 3.4.24.-) (METH-2) (METH-8)	ADAMTS8 METH2	Homo sapiens (Human)	889
Q9P2N4	ATS9_HUMAN	reviewed	A disintegrin and metalloproteinase with thrombospondin motifs 9 (ADAM-TS 9) (ADAM-TS9) (ADAMTS-9) (EC 3.4.24.-)	ADAMTS9 KIAA1312	Homo sapiens (Human)	1935
P17735	ATTY_HUMAN	reviewed	Tyrosine aminotransferase (TAT) (EC 2.6.1.5) (L-tyrosine:2-oxoglutarate aminotransferase)	TAT	Homo sapiens (Human)	454
Q9UBB4	ATX10_HUMAN	reviewed	Ataxin-10 (Brain protein E46 homolog) (Spinocerebellar ataxia type 10 protein)	ATXN10 SCA10	Homo sapiens (Human)	475
P0C7T5	ATX1L_HUMAN	reviewed	Ataxin-1-like (Brother of ataxin-1) (Brother of ATXN1)	ATXN1L BOAT BOAT1	Homo sapiens (Human)	689
P54253	ATX1_HUMAN	reviewed	Ataxin-1 (Spinocerebellar ataxia type 1 protein)	ATXN1 ATX1 SCA1	Homo sapiens (Human)	815
Q8WWM7	ATX2L_HUMAN	reviewed	Ataxin-2-like protein (Ataxin-2 domain protein) (Ataxin-2-related protein)	ATXN2L A2D A2LG A2LP A2RP	Homo sapiens (Human)	1075
Q99700	ATX2_HUMAN	reviewed	Ataxin-2 (Spinocerebellar ataxia type 2 protein) (Trinucleotide repeat-containing gene 13 protein)	ATXN2 ATX2 SCA2 TNRC13	Homo sapiens (Human)	1313
Q9H3M9	ATX3L_HUMAN	reviewed	Putative ataxin-3-like protein (EC 3.4.19.12) (Machado-Joseph disease protein 1-like)	ATXN3L ATX3L MJDL	Homo sapiens (Human)	355
P54252	ATX3_HUMAN	reviewed	Ataxin-3 (EC 3.4.19.12) (Machado-Joseph disease protein 1) (Spinocerebellar ataxia type 3 protein)	ATXN3 ATX3 MJD MJD1 SCA3	Homo sapiens (Human)	364
O15265	ATX7_HUMAN	reviewed	Ataxin-7 (Spinocerebellar ataxia type 7 protein)	ATXN7 SCA7	Homo sapiens (Human)	892
Q156A1	ATX8_HUMAN	reviewed	Ataxin-8 (Protein 1C2)	ATXN8	Homo sapiens (Human)	80
Q9H1Z8	AUGN_HUMAN	reviewed	Augurin (Esophageal cancer-related gene 4 protein)	C2orf40 ECRG4 UNQ761/PRO1508	Homo sapiens (Human)	148
Q13825	AUHM_HUMAN	reviewed	Methylglutaconyl-CoA hydratase, mitochondrial (EC 4.2.1.18) (AU-specific RNA-binding enoyl-CoA hydratase) (AU-binding protein/enoyl-CoA hydratase)	AUH	Homo sapiens (Human)	339
Q9H7T9	AUNIP_HUMAN	reviewed	Aurora kinase A and ninein-interacting protein (AIBp)	AUNIP C1orf135	Homo sapiens (Human)	357
Q9Y679	AUP1_HUMAN	reviewed	Ancient ubiquitous protein 1	AUP1	Homo sapiens (Human)	476
O14965	AURKA_HUMAN	reviewed	Aurora kinase A (EC 2.7.11.1) (Aurora 2) (Aurora/IPL1-related kinase 1) (ARK-1) (Aurora-related kinase 1) (hARK1) (Breast tumor-amplified kinase) (Serine/threonine-protein kinase 15) (Serine/threonine-protein kinase 6) (Serine/threonine-protein kinase aurora-A)	AURKA AIK AIRK1 ARK1 AURA AYK1 BTAK IAK1 STK15 STK6	Homo sapiens (Human)	403
Q96GD4	AURKB_HUMAN	reviewed	Aurora kinase B (EC 2.7.11.1) (Aurora 1) (Aurora- and IPL1-like midbody-associated protein 1) (AIM-1) (Aurora/IPL1-related kinase 2) (ARK-2) (Aurora-related kinase 2) (STK-1) (Serine/threonine-protein kinase 12) (Serine/threonine-protein kinase 5) (Serine/threonine-protein kinase aurora-B)	AURKB AIK2 AIM1 AIRK2 ARK2 STK1 STK12 STK5	Homo sapiens (Human)	344
Q9UQB9	AURKC_HUMAN	reviewed	Aurora kinase C (EC 2.7.11.1) (Aurora 3) (Aurora/IPL1-related kinase 3) (ARK-3) (Aurora-related kinase 3) (Aurora/IPL1/Eg2 protein 2) (Serine/threonine-protein kinase 13) (Serine/threonine-protein kinase aurora-C)	AURKC AIE2 AIK3 AIRK3 ARK3 STK13	Homo sapiens (Human)	309
Q8WXX7	AUTS2_HUMAN	reviewed	Autism susceptibility gene 2 protein	AUTS2 KIAA0442	Homo sapiens (Human)	1259
O75061	AUXI_HUMAN	reviewed	Putative tyrosine-protein phosphatase auxilin (EC 3.1.3.48) (DnaJ homolog subfamily C member 6)	DNAJC6 KIAA0473	Homo sapiens (Human)	913
Q9NQS1	AVEN_HUMAN	reviewed	Cell death regulator Aven	AVEN	Homo sapiens (Human)	362
O75366	AVIL_HUMAN	reviewed	Advillin (p92)	AVIL	Homo sapiens (Human)	819
Q8NBF6	AVL9_HUMAN	reviewed	Late secretory pathway protein AVL9 homolog	AVL9 KIAA0241	Homo sapiens (Human)	648
Q5T686	AVPI1_HUMAN	reviewed	Arginine vasopressin-induced protein 1 (AVP-induced protein 1)	AVPI1 NPD013 PP5395	Homo sapiens (Human)	147
P27037	AVR2A_HUMAN	reviewed	Activin receptor type-2A (EC 2.7.11.30) (Activin receptor type IIA) (ACTR-IIA) (ACTRIIA)	ACVR2A ACVR2	Homo sapiens (Human)	513
Q13705	AVR2B_HUMAN	reviewed	Activin receptor type-2B (EC 2.7.11.30) (Activin receptor type IIB) (ACTR-IIB)	ACVR2B	Homo sapiens (Human)	512
Q58HT5	AWAT1_HUMAN	reviewed	Acyl-CoA wax alcohol acyltransferase 1 (EC 2.3.1.75) (Diacylglycerol O-acyltransferase 2-like protein 3) (Diacylglycerol acyltransferase 2) (Long-chain-alcohol O-fatty-acyltransferase 1)	AWAT1 DGA2 DGAT2L3	Homo sapiens (Human)	328
Q6E213	AWAT2_HUMAN	reviewed	Acyl-CoA wax alcohol acyltransferase 2 (EC 2.3.1.75) (Acyl-CoA retinol O-fatty-acyltransferase) (ARAT) (Retinol O-fatty-acyltransferase) (EC 2.3.1.76) (Diacylglycerol O-acyltransferase 2-like protein 4) (Diacylglycerol O-acyltransferase candidate 4) (hDC4) (Long-chain-alcohol O-fatty-acyltransferase 2) (Multifunctional O-acyltransferase) (Wax synthase) (hWS)	AWAT2 DC4 DGAT2L4 MFAT WS	Homo sapiens (Human)	333
Q3ZCQ2	AX2R_HUMAN	reviewed	Annexin-2 receptor (Annexin II receptor) (AXIIR)	ANXA2R AX2R C5orf39	Homo sapiens (Human)	193
A6NMY6	AXA2L_HUMAN	reviewed	Putative annexin A2-like protein (Annexin A2 pseudogene 2) (Lipocortin II pseudogene)	ANXA2P2 ANX2L2 ANX2P2 LPC2B	Homo sapiens (Human)	339
Q5T2P8	AXA81_HUMAN	reviewed	Annexin A8-like protein 1	ANXA8L1	Homo sapiens (Human)	327
Q5VT79	AXA82_HUMAN	reviewed	Annexin A8-like protein 2	ANXA8L2	Homo sapiens (Human)	327
Q5T1B0	AXDN1_HUMAN	reviewed	Axonemal dynein light chain domain-containing protein 1	AXDND1 C1orf125	Homo sapiens (Human)	1012
O15169	AXIN1_HUMAN	reviewed	Axin-1 (Axis inhibition protein 1) (hAxin)	AXIN1 AXIN	Homo sapiens (Human)	862
Q9Y2T1	AXIN2_HUMAN	reviewed	Axin-2 (Axin-like protein) (Axil) (Axis inhibition protein 2) (Conductin)	AXIN2	Homo sapiens (Human)	843
Q9UPN4	AZI1_HUMAN	reviewed	5-azacytidine-induced protein 1 (Centrosomal protein of 131 kDa) (Cep131) (Pre-acrosome localization protein 1)	AZI1 CEP131 KIAA1118	Homo sapiens (Human)	1083
Q9H6S1	AZI2_HUMAN	reviewed	5-azacytidine-induced protein 2 (NF-kappa-B-activating kinase-associated protein 1) (Nak-associated protein 1) (TILP)	AZI2 NAP1	Homo sapiens (Human)	392
O14977	AZIN1_HUMAN	reviewed	Antizyme inhibitor 1 (AZI) (Ornithine decarboxylase antizyme inhibitor)	AZIN1 OAZI OAZIN	Homo sapiens (Human)	448
Q07817	B2CL1_HUMAN	reviewed	Bcl-2-like protein 1 (Bcl2-L-1) (Apoptosis regulator Bcl-X)	BCL2L1 BCL2L BCLX	Homo sapiens (Human)	233
Q92843	B2CL2_HUMAN	reviewed	Bcl-2-like protein 2 (Bcl2-L-2) (Apoptosis regulator Bcl-W)	BCL2L2 BCLW KIAA0271	Homo sapiens (Human)	193
Q9HD36	B2L10_HUMAN	reviewed	Bcl-2-like protein 10 (Bcl2-L-10) (Anti-apoptotic protein NrH) (Apoptosis regulator Bcl-B)	BCL2L10 BCLB	Homo sapiens (Human)	194
O43521	B2L11_HUMAN	reviewed	Bcl-2-like protein 11 (Bcl2-L-11) (Bcl2-interacting mediator of cell death)	BCL2L11 BIM	Homo sapiens (Human)	198
Q9HB09	B2L12_HUMAN	reviewed	Bcl-2-like protein 12 (Bcl2-L-12) (Bcl-2-related proline-rich protein)	BCL2L12 BPR	Homo sapiens (Human)	334
Q9BXK5	B2L13_HUMAN	reviewed	Bcl-2-like protein 13 (Bcl2-L-13) (Bcl-rambo) (Protein Mil1)	BCL2L13 MIL1 CD003	Homo sapiens (Human)	485
Q9BZR8	B2L14_HUMAN	reviewed	Apoptosis facilitator Bcl-2-like protein 14 (Bcl2-L-14) (Apoptosis regulator Bcl-G)	BCL2L14 BCLG	Homo sapiens (Human)	327
Q5TBC7	B2L15_HUMAN	reviewed	Bcl-2-like protein 15 (Bcl2-L-15)	BCL2L15 C1orf178	Homo sapiens (Human)	163
Q16548	B2LA1_HUMAN	reviewed	Bcl-2-related protein A1 (Bcl-2-like protein 5) (Bcl2-L-5) (Hemopoietic-specific early response protein) (Protein BFL-1) (Protein GRS)	BCL2A1 BCL2L5 BFL1 GRS HBPA1	Homo sapiens (Human)	175
P61769	B2MG_HUMAN	reviewed	Beta-2-microglobulin [Cleaved into: Beta-2-microglobulin form pI 5.3]	B2M CDABP0092 HDCMA22P	Homo sapiens (Human)	119
P04920	B3A2_HUMAN	reviewed	Anion exchange protein 2 (AE 2) (Anion exchanger 2) (Non-erythroid band 3-like protein) (BND3L) (Solute carrier family 4 member 2)	SLC4A2 AE2 EPB3L1 HKB3 MPB3L	Homo sapiens (Human)	1241
P48751	B3A3_HUMAN	reviewed	Anion exchange protein 3 (AE 3) (Anion exchanger 3) (CAE3/BAE3) (Cardiac/brain band 3-like protein) (Neuronal band 3-like protein) (Solute carrier family 4 member 3)	SLC4A3 AE3	Homo sapiens (Human)	1232
Q96Q91	B3A4_HUMAN	reviewed	Anion exchange protein 4 (AE 4) (Anion exchanger 4) (Sodium bicarbonate cotransporter 5) (Solute carrier family 4 member 9)	SLC4A9 AE4 SBC5	Homo sapiens (Human)	983
P02730	B3AT_HUMAN	reviewed	Band 3 anion transport protein (Anion exchange protein 1) (AE 1) (Anion exchanger 1) (Solute carrier family 4 member 1) (CD antigen CD233)	SLC4A1 AE1 DI EPB3	Homo sapiens (Human)	911
Q9P2W7	B3GA1_HUMAN	reviewed	Galactosylgalactosylxylosylprotein 3-beta-glucuronosyltransferase 1 (EC 2.4.1.135) (Beta-1,3-glucuronyltransferase 1) (Glucuronosyltransferase P) (GlcAT-P) (UDP-GlcUA:glycoprotein beta-1,3-glucuronyltransferase) (GlcUAT-P)	B3GAT1 GLCATP	Homo sapiens (Human)	334
Q9NPZ5	B3GA2_HUMAN	reviewed	Galactosylgalactosylxylosylprotein 3-beta-glucuronosyltransferase 2 (EC 2.4.1.135) (Beta-1,3-glucuronyltransferase 2) (GlcAT-D) (UDP-glucuronosyltransferase S) (GlcAT-S) (Glucuronosyltransferase S)	B3GAT2 GLCATS KIAA1963	Homo sapiens (Human)	323
O94766	B3GA3_HUMAN	reviewed	Galactosylgalactosylxylosylprotein 3-beta-glucuronosyltransferase 3 (EC 2.4.1.135) (Beta-1,3-glucuronyltransferase 3) (Glucuronosyltransferase I) (GlcAT-I) (UDP-GlcUA:Gal beta-1,3-Gal-R glucuronyltransferase) (GlcUAT-I)	B3GAT3	Homo sapiens (Human)	335
O75752	B3GL1_HUMAN	reviewed	UDP-GalNAc:beta-1,3-N-acetylgalactosaminyltransferase 1 (Beta-1,3-GalNAc-T1) (EC 2.4.1.79) (Beta-1,3-galactosyltransferase 3) (Beta-1,3-GalTase 3) (Beta3Gal-T3) (Beta3GalT3) (b3Gal-T3) (Beta-3-Gx-T3) (Galactosylgalactosylglucosylceramide beta-D-acetyl-galactosaminyltransferase) (Globoside synthase) (UDP-N-acetylgalactosamine:globotriaosylceramide beta-1,3-N-acetylgalactosaminyltransferase)	B3GALNT1 B3GALT3 UNQ531/PRO1074	Homo sapiens (Human)	331
Q8NCR0	B3GL2_HUMAN	reviewed	UDP-GalNAc:beta-1,3-N-acetylgalactosaminyltransferase 2 (Beta-1,3-GalNAc-T2) (EC 2.4.1.-) (Beta-1,3-N-acetylgalactosaminyltransferase II)	B3GALNT2	Homo sapiens (Human)	500
Q6Y288	B3GLT_HUMAN	reviewed	Beta-1,3-glucosyltransferase (Beta3Glc-T) (EC 2.4.1.-) (Beta-3-glycosyltransferase-like)	B3GALTL B3GTL	Homo sapiens (Human)	498
O43505	B3GN1_HUMAN	reviewed	N-acetyllactosaminide beta-1,3-N-acetylglucosaminyltransferase (EC 2.4.1.149) (I-beta-1,3-N-acetylglucosaminyltransferase) (iGnT) (Poly-N-acetyllactosamine extension enzyme) (UDP-GlcNAc:betaGal beta-1,3-N-acetylglucosaminyltransferase 1)	B3GNT1 B3GNT6	Homo sapiens (Human)	415
Q9NY97	B3GN2_HUMAN	reviewed	UDP-GlcNAc:betaGal beta-1,3-N-acetylglucosaminyltransferase 2 (BGnT-2) (Beta-1,3-Gn-T2) (Beta-1,3-N-acetylglucosaminyltransferase 2) (Beta3Gn-T2) (EC 2.4.1.-) (Beta-1,3-N-acetylglucosaminyltransferase 1) (BGnT-1) (Beta-1,3-Gn-T1) (Beta3Gn-T1) (Beta-1,3-galactosyltransferase 7) (Beta-1,3-GalTase 7) (Beta3Gal-T7) (Beta3GalT7) (b3Gal-T7) (Beta-3-Gx-T7) (UDP-Gal:beta-GlcNAc beta-1,3-galactosyltransfe…	B3GNT2 B3GALT7 B3GNT1	Homo sapiens (Human)	397
Q9Y2A9	B3GN3_HUMAN	reviewed	UDP-GlcNAc:betaGal beta-1,3-N-acetylglucosaminyltransferase 3 (BGnT-3) (Beta-1,3-Gn-T3) (Beta-1,3-N-acetylglucosaminyltransferase 3) (Beta3Gn-T3) (EC 2.4.1.-) (Beta-1,3-galactosyltransferase 8) (Beta-1,3-GalTase 8) (Beta3Gal-T8) (Beta3GalT8) (b3Gal-T8) (Beta-3-Gx-T8) (Core 1 extending beta-1,3-N-acetylglucosaminyltransferase) (Core1-beta3GlcNAcT) (Transmembrane protein 3) (UDP-Gal:beta-GlcNAc bet…	B3GNT3 B3GALT8 TMEM3 UNQ637/PRO1266	Homo sapiens (Human)	372
Q9C0J1	B3GN4_HUMAN	reviewed	UDP-GlcNAc:betaGal beta-1,3-N-acetylglucosaminyltransferase 4 (BGnT-4) (Beta-1,3-Gn-T4) (Beta-1,3-N-acetylglucosaminyltransferase 4) (Beta3Gn-T4) (EC 2.4.1.-)	B3GNT4 UNQ1898/PRO4344	Homo sapiens (Human)	378
Q9BYG0	B3GN5_HUMAN	reviewed	Lactosylceramide 1,3-N-acetyl-beta-D-glucosaminyltransferase (EC 2.4.1.206) (Lactotriaosylceramide synthase) (Lc(3)Cer synthase) (Lc3 synthase) (UDP-GlcNAc:beta-Gal beta-1,3-N-acetylglucosaminyltransferase 5) (BGnT-5) (Beta-1,3-Gn-T5) (Beta-1,3-N-acetylglucosaminyltransferase 5) (Beta3Gn-T5)	B3GNT5	Homo sapiens (Human)	378
Q6ZMB0	B3GN6_HUMAN	reviewed	UDP-GlcNAc:betaGal beta-1,3-N-acetylglucosaminyltransferase 6 (BGnT-6) (Beta-1,3-Gn-T6) (Beta-1,3-N-acetylglucosaminyltransferase 6) (Beta3Gn-T6) (EC 2.4.1.-) (Core 3 synthase)	B3GNT6	Homo sapiens (Human)	384
Q8NFL0	B3GN7_HUMAN	reviewed	UDP-GlcNAc:betaGal beta-1,3-N-acetylglucosaminyltransferase 7 (BGnT-7) (Beta-1,3-Gn-T7) (Beta-1,3-N-acetylglucosaminyltransferase 7) (Beta3Gn-T7) (EC 2.4.1.-)	B3GNT7	Homo sapiens (Human)	401
Q7Z7M8	B3GN8_HUMAN	reviewed	UDP-GlcNAc:betaGal beta-1,3-N-acetylglucosaminyltransferase 8 (BGnT-8) (Beta-1,3-Gn-T8) (Beta-1,3-N-acetylglucosaminyltransferase 8) (Beta3Gn-T8) (EC 2.4.1.-)	B3GNT8 B3GALT7 BGALT15	Homo sapiens (Human)	397
Q6UX72	B3GN9_HUMAN	reviewed	UDP-GlcNAc:betaGal beta-1,3-N-acetylglucosaminyltransferase 9 (BGnT-9) (Beta-1,3-Gn-T9) (Beta-1,3-N-acetylglucosaminyltransferase 9) (Beta3Gn-T9) (EC 2.4.1.-)	B3GNT9 UNQ1922/PRO4397	Homo sapiens (Human)	402
Q67FW5	B3GNL_HUMAN	reviewed	UDP-GlcNAc:betaGal beta-1,3-N-acetylglucosaminyltransferase-like protein 1 (BGnT-like protein 1) (Beta1,3-N-acetylglucosaminyltransferase-like protein 1) (Beta3Gn-T-like protein 1) (Beta3GnTL1) (EC 2.4.1.-) (Beta-1,3-N-acetylglucosaminyltransferase 8) (BGnT-8) (Beta-1,3-Gn-T8) (Beta3Gn-T8)	B3GNTL1 B3GNT8	Homo sapiens (Human)	361
Q9Y5Z6	B3GT1_HUMAN	reviewed	Beta-1,3-galactosyltransferase 1 (Beta-1,3-GalTase 1) (Beta3Gal-T1) (Beta3GalT1) (EC 2.4.1.-) (UDP-galactose:beta-N-acetyl-glucosamine-beta-1,3-galactosyltransferase 1)	B3GALT1	Homo sapiens (Human)	326
O43825	B3GT2_HUMAN	reviewed	Beta-1,3-galactosyltransferase 2 (Beta-1,3-GalTase 2) (Beta3Gal-T2) (Beta3GalT2) (EC 2.4.1.-) (UDP-galactose:2-acetamido-2-deoxy-D-glucose 3beta-galactosyltransferase 2)	B3GALT2	Homo sapiens (Human)	422
O96024	B3GT4_HUMAN	reviewed	Beta-1,3-galactosyltransferase 4 (Beta-1,3-GalTase 4) (Beta3Gal-T4) (Beta3GalT4) (GalT4) (b3Gal-T4) (EC 2.4.1.62) (Gal-T2) (Ganglioside galactosyltransferase) (UDP-galactose:beta-N-acetyl-galactosamine-beta-1,3-galactosyltransferase)	B3GALT4 GALT4	Homo sapiens (Human)	378
Q9Y2C3	B3GT5_HUMAN	reviewed	Beta-1,3-galactosyltransferase 5 (Beta-1,3-GalTase 5) (Beta3Gal-T5) (Beta3GalT5) (b3Gal-T5) (EC 2.4.1.-) (Beta-3-Gx-T5) (UDP-Gal:beta-GlcNAc beta-1,3-galactosyltransferase 5) (UDP-galactose:beta-N-acetylglucosamine beta-1,3-galactosyltransferase 5)	B3GALT5	Homo sapiens (Human)	310
Q96L58	B3GT6_HUMAN	reviewed	Beta-1,3-galactosyltransferase 6 (Beta-1,3-GalTase 6) (Beta3Gal-T6) (Beta3GalT6) (EC 2.4.1.134) (GAG GalTII) (Galactosyltransferase II) (Galactosylxylosylprotein 3-beta-galactosyltransferase) (UDP-Gal:betaGal beta 1,3-galactosyltransferase polypeptide 6)	B3GALT6	Homo sapiens (Human)	329
Q00973	B4GN1_HUMAN	reviewed	Beta-1,4 N-acetylgalactosaminyltransferase 1 (EC 2.4.1.92) ((N-acetylneuraminyl)-galactosylglucosylceramide) (GM2/GD2 synthase) (GalNAc-T)	B4GALNT1 GALGT SIAT2	Homo sapiens (Human)	533
Q8NHY0	B4GN2_HUMAN	reviewed	Beta-1,4 N-acetylgalactosaminyltransferase 2 (EC 2.4.1.-) (Sd(a) beta-1,4-GalNAc transferase) (UDP-GalNAc:Neu5Aca2-3Galb-R b1,4-N-acetylgalactosaminyltransferase)	B4GALNT2 GALGT2	Homo sapiens (Human)	566
Q6L9W6	B4GN3_HUMAN	reviewed	Beta-1,4-N-acetylgalactosaminyltransferase 3 (B4GalNAcT3) (Beta4GalNAc-T3) (Beta4GalNAcT3) (EC 2.4.1.244) (Beta-1,4-N-acetylgalactosaminyltransferase III) (N-acetyl-beta-glucosaminyl-glycoprotein 4-beta-N-acetylgalactosaminyltransferase 2) (NGalNAc-T2)	B4GALNT3	Homo sapiens (Human)	998
Q76KP1	B4GN4_HUMAN	reviewed	N-acetyl-beta-glucosaminyl-glycoprotein 4-beta-N-acetylgalactosaminyltransferase 1 (NGalNAc-T1) (EC 2.4.1.244) (Beta-1,4-N-acetylgalactosaminyltransferase IV) (Beta4GalNAc-T4) (Beta4GalNAcT4)	B4GALNT4	Homo sapiens (Human)	1039
P15291	B4GT1_HUMAN	reviewed	Beta-1,4-galactosyltransferase 1 (Beta-1,4-GalTase 1) (Beta4Gal-T1) (b4Gal-T1) (EC 2.4.1.-) (UDP-Gal:beta-GlcNAc beta-1,4-galactosyltransferase 1) (UDP-galactose:beta-N-acetylglucosamine beta-1,4-galactosyltransferase 1) [Cleaved into: Processed beta-1,4-galactosyltransferase 1] [Includes: Lactose synthase A protein (EC 2.4.1.22); N-acetyllactosamine synthase (EC 2.4.1.90) (Nal synthase); Beta-N-…	B4GALT1 GGTB2	Homo sapiens (Human)	398
O60909	B4GT2_HUMAN	reviewed	Beta-1,4-galactosyltransferase 2 (Beta-1,4-GalTase 2) (Beta4Gal-T2) (b4Gal-T2) (EC 2.4.1.-) (UDP-Gal:beta-GlcNAc beta-1,4-galactosyltransferase 2) (UDP-galactose:beta-N-acetylglucosamine beta-1,4-galactosyltransferase 2) [Includes: Lactose synthase A protein (EC 2.4.1.22); N-acetyllactosamine synthase (EC 2.4.1.90) (Nal synthase); Beta-N-acetylglucosaminylglycopeptide beta-1,4-galactosyltransfera…	B4GALT2	Homo sapiens (Human)	372
O60512	B4GT3_HUMAN	reviewed	Beta-1,4-galactosyltransferase 3 (Beta-1,4-GalTase 3) (Beta4Gal-T3) (b4Gal-T3) (EC 2.4.1.-) (UDP-Gal:beta-GlcNAc beta-1,4-galactosyltransferase 3) (UDP-galactose:beta-N-acetylglucosamine beta-1,4-galactosyltransferase 3) [Includes: N-acetyllactosamine synthase (EC 2.4.1.90) (Nal synthase); Beta-N-acetylglucosaminylglycopeptide beta-1,4-galactosyltransferase (EC 2.4.1.38); Beta-N-acetylglucosaminy…	B4GALT3	Homo sapiens (Human)	393
O60513	B4GT4_HUMAN	reviewed	Beta-1,4-galactosyltransferase 4 (Beta-1,4-GalTase 4) (Beta4Gal-T4) (b4Gal-T4) (EC 2.4.1.-) (UDP-Gal:beta-GlcNAc beta-1,4-galactosyltransferase 4) (UDP-galactose:beta-N-acetylglucosamine beta-1,4-galactosyltransferase 4) [Includes: N-acetyllactosamine synthase (EC 2.4.1.90) (Nal synthase); Lactotriaosylceramide beta-1,4-galactosyltransferase (EC 2.4.1.275) (Beta-N-acetylglucosaminyl-glycolipid be…	B4GALT4 UNQ552/PRO1109	Homo sapiens (Human)	344
O43286	B4GT5_HUMAN	reviewed	Beta-1,4-galactosyltransferase 5 (Beta-1,4-GalTase 5) (Beta4Gal-T5) (b4Gal-T5) (EC 2.4.1.-) (Beta-1,4-GalT II) (UDP-Gal:beta-GlcNAc beta-1,4-galactosyltransferase 5) (UDP-galactose:beta-N-acetylglucosamine beta-1,4-galactosyltransferase 5)	B4GALT5	Homo sapiens (Human)	388
Q9UBX8	B4GT6_HUMAN	reviewed	Beta-1,4-galactosyltransferase 6 (Beta-1,4-GalTase 6) (Beta4Gal-T6) (b4Gal-T6) (EC 2.4.1.-) (UDP-Gal:beta-GlcNAc beta-1,4-galactosyltransferase 6) (UDP-galactose:beta-N-acetylglucosamine beta-1,4-galactosyltransferase 6) [Includes: Glucosylceramide beta-1,4-galactosyltransferase (EC 2.4.1.274) (Lactosylceramide synthase) (LacCer synthase) (UDP-Gal:glucosylceramide beta-1,4-galactosyltransferase)]	B4GALT6	Homo sapiens (Human)	382
Q9UBV7	B4GT7_HUMAN	reviewed	Beta-1,4-galactosyltransferase 7 (Beta-1,4-GalTase 7) (Beta4Gal-T7) (b4Gal-T7) (EC 2.4.1.-) (UDP-Gal:beta-GlcNAc beta-1,4-galactosyltransferase 7) (UDP-galactose:beta-N-acetylglucosamine beta-1,4-galactosyltransferase 7) [Includes: Xylosylprotein 4-beta-galactosyltransferase (EC 2.4.1.133) (Proteoglycan UDP-galactose:beta-xylose beta1,4-galactosyltransferase I) (UDP-galactose:beta-xylose beta-1,4…	B4GALT7 XGALT1 UNQ748/PRO1478	Homo sapiens (Human)	327
Q9UPM9	B9D1_HUMAN	reviewed	B9 domain-containing protein 1 (MKS1-related protein 1)	B9D1 MKSR1	Homo sapiens (Human)	204
Q9BPU9	B9D2_HUMAN	reviewed	B9 domain-containing protein 2 (MKS1-related protein 2)	B9D2 MKSR2	Homo sapiens (Human)	175
Q8WXS3	BAALC_HUMAN	reviewed	Brain and acute leukemia cytoplasmic protein	BAALC	Homo sapiens (Human)	180
Q14032	BAAT_HUMAN	reviewed	Bile acid-CoA:amino acid N-acyltransferase (BACAT) (BAT) (EC 2.3.1.65) (Glycine N-choloyltransferase) (Long-chain fatty-acyl-CoA hydrolase) (EC 3.1.2.2)	BAAT	Homo sapiens (Human)	418
Q9NWV8	BABA1_HUMAN	reviewed	BRISC and BRCA1-A complex member 1 (Mediator of RAP80 interactions and targeting subunit of 40 kDa) (New component of the BRCA1-A complex)	BABAM1 C19orf62 MERIT40 NBA1 HSPC142	Homo sapiens (Human)	329
Q8WZ19	BACD1_HUMAN	reviewed	BTB/POZ domain-containing adapter for CUL3-mediated RhoA degradation protein 1 (hBACURD1) (BTB/POZ domain-containing protein KCTD13) (Polymerase delta-interacting protein 1) (TNFAIP1-like protein)	KCTD13 BACURD1 PDIP1 POLDIP1 FKSG86 PP6832	Homo sapiens (Human)	329
Q13829	BACD2_HUMAN	reviewed	BTB/POZ domain-containing adapter for CUL3-mediated RhoA degradation protein 2 (hBACURD2) (BTB/POZ domain-containing protein TNFAIP1) (Protein B12) (Tumor necrosis factor, alpha-induced protein 1, endothelial)	TNFAIP1 BACURD2 EDP1	Homo sapiens (Human)	316
Q9H3F6	BACD3_HUMAN	reviewed	BTB/POZ domain-containing adapter for CUL3-mediated RhoA degradation protein 3 (hBACURD3) (BTB/POZ domain-containing protein KCTD10) (Potassium channel tetramerization domain-containing protein 10)	KCTD10 ULR061 MSTP028	Homo sapiens (Human)	313
P56817	BACE1_HUMAN	reviewed	Beta-secretase 1 (EC 3.4.23.46) (Aspartyl protease 2) (ASP2) (Asp 2) (Beta-site amyloid precursor protein cleaving enzyme 1) (Beta-site APP cleaving enzyme 1) (Memapsin-2) (Membrane-associated aspartic protease 2)	BACE1 BACE KIAA1149	Homo sapiens (Human)	501
Q9Y5Z0	BACE2_HUMAN	reviewed	Beta-secretase 2 (EC 3.4.23.45) (Aspartic-like protease 56 kDa) (Aspartyl protease 1) (ASP1) (Asp 1) (Beta-site amyloid precursor protein cleaving enzyme 2) (Beta-site APP cleaving enzyme 2) (Down region aspartic protease) (DRAP) (Memapsin-1) (Membrane-associated aspartic protease 1) (Theta-secretase)	BACE2 AEPLC ALP56 ASP21 CDA13 UNQ418/PRO852	Homo sapiens (Human)	518
O14867	BACH1_HUMAN	reviewed	Transcription regulator protein BACH1 (BTB and CNC homolog 1) (HA2303)	BACH1	Homo sapiens (Human)	736
Q9BYV9	BACH2_HUMAN	reviewed	Transcription regulator protein BACH2 (BTB and CNC homolog 2)	BACH2	Homo sapiens (Human)	841
Q6ZUV0	BACHL_HUMAN	reviewed	Cytosolic acyl coenzyme A thioester hydrolase-like (EC 3.1.2.2) (Acyl-CoA thioesterase 7-like)	ACOT7L BACHL	Homo sapiens (Human)	252
O00154	BACH_HUMAN	reviewed	Cytosolic acyl coenzyme A thioester hydrolase (EC 3.1.2.2) (Acyl-CoA thioesterase 7) (Brain acyl-CoA hydrolase) (BACH) (CTE-IIa) (CTE-II) (Long chain acyl-CoA thioester hydrolase)	ACOT7 BACH	Homo sapiens (Human)	380
Q92934	BAD_HUMAN	reviewed	Bcl2 antagonist of cell death (BAD) (Bcl-2-binding component 6) (Bcl-2-like protein 8) (Bcl2-L-8) (Bcl-XL/Bcl-2-associated death promoter)	BAD BBC6 BCL2L8	Homo sapiens (Human)	168
Q9H503	BAFL_HUMAN	reviewed	Barrier-to-autointegration factor-like protein (BAF-L) (Barrier-to-autointegration factor 2)	BANF2 BAFL C20orf179	Homo sapiens (Human)	90
O75531	BAF_HUMAN	reviewed	Barrier-to-autointegration factor (Breakpoint cluster region protein 1)	BANF1 BAF BCRG1	Homo sapiens (Human)	89
Q99933	BAG1_HUMAN	reviewed	BAG family molecular chaperone regulator 1 (BAG-1) (Bcl-2-associated athanogene 1)	BAG1 HAP	Homo sapiens (Human)	345
O95816	BAG2_HUMAN	reviewed	BAG family molecular chaperone regulator 2 (BAG-2) (Bcl-2-associated athanogene 2)	BAG2	Homo sapiens (Human)	211
O95817	BAG3_HUMAN	reviewed	BAG family molecular chaperone regulator 3 (BAG-3) (Bcl-2-associated athanogene 3) (Bcl-2-binding protein Bis) (Docking protein CAIR-1)	BAG3 BIS	Homo sapiens (Human)	575
O95429	BAG4_HUMAN	reviewed	BAG family molecular chaperone regulator 4 (BAG-4) (Bcl-2-associated athanogene 4) (Silencer of death domains)	BAG4 SODD	Homo sapiens (Human)	457
Q9UL15	BAG5_HUMAN	reviewed	BAG family molecular chaperone regulator 5 (BAG-5) (Bcl-2-associated athanogene 5)	BAG5 KIAA0873	Homo sapiens (Human)	447
P46379	BAG6_HUMAN	reviewed	Large proline-rich protein BAG6 (BAG family molecular chaperone regulator 6) (BCL2-associated athanogene 6) (BAG-6) (BAG6) (HLA-B-associated transcript 3) (Protein G3) (Protein Scythe)	BAG6 BAT3 G3	Homo sapiens (Human)	1132
Q13072	BAGE1_HUMAN	reviewed	B melanoma antigen 1 (B melanoma antigen) (Antigen MZ2-BA) (Cancer/testis antigen 2.1) (CT2.1)	BAGE BAGE1	Homo sapiens (Human)	43
Q86Y30	BAGE2_HUMAN	reviewed	B melanoma antigen 2 (Cancer/testis antigen 2.2) (CT2.2)	BAGE2	Homo sapiens (Human)	109
Q86Y29	BAGE3_HUMAN	reviewed	B melanoma antigen 3 (Cancer/testis antigen 2.3) (CT2.3)	BAGE3	Homo sapiens (Human)	109
Q86Y28	BAGE4_HUMAN	reviewed	B melanoma antigen 4 (Cancer/testis antigen 2.4) (CT2.4)	BAGE4 MLL3P	Homo sapiens (Human)	39
Q86Y27	BAGE5_HUMAN	reviewed	B melanoma antigen 5 (Cancer/testis antigen 2.5) (CT2.5)	BAGE5	Homo sapiens (Human)	43
Q9P281	BAHC1_HUMAN	reviewed	BAH and coiled-coil domain-containing protein 1 (Bromo adjacent homology domain-containing protein 2) (BAH domain-containing protein 2)	BAHCC1 BAHD2 KIAA1447	Homo sapiens (Human)	2608
Q8TBE0	BAHD1_HUMAN	reviewed	Bromo adjacent homology domain-containing 1 protein (BAH domain-containing protein 1)	BAHD1 KIAA0945	Homo sapiens (Human)	780
O14514	BAI1_HUMAN	reviewed	Brain-specific angiogenesis inhibitor 1	BAI1	Homo sapiens (Human)	1584
O60241	BAI2_HUMAN	reviewed	Brain-specific angiogenesis inhibitor 2	BAI2	Homo sapiens (Human)	1585
O60242	BAI3_HUMAN	reviewed	Brain-specific angiogenesis inhibitor 3	BAI3 KIAA0550	Homo sapiens (Human)	1522
Q9UQB8	BAIP2_HUMAN	reviewed	Brain-specific angiogenesis inhibitor 1-associated protein 2 (BAI-associated protein 2) (BAI1-associated protein 2) (Protein BAP2) (Fas ligand-associated factor 3) (FLAF3) (Insulin receptor substrate p53/p58) (IRS-58) (IRSp53/58) (Insulin receptor substrate protein of 53 kDa) (IRSp53) (Insulin receptor substrate p53)	BAIAP2	Homo sapiens (Human)	552
O94812	BAIP3_HUMAN	reviewed	BAI1-associated protein 3 (BAP3)	BAIAP3 KIAA0734	Homo sapiens (Human)	1187
Q6ZNE5	BAKOR_HUMAN	reviewed	Beclin 1-associated autophagy-related key regulator (Barkor) (Autophagy-related protein 14-like protein) (Atg14L)	ATG14 KIAA0831	Homo sapiens (Human)	492
Q16611	BAK_HUMAN	reviewed	Bcl-2 homologous antagonist/killer (Apoptosis regulator BAK) (Bcl-2-like protein 7) (Bcl2-L-7)	BAK1 BAK BCL2L7 CDN1	Homo sapiens (Human)	211
Q13145	BAMBI_HUMAN	reviewed	BMP and activin membrane-bound inhibitor homolog (Non-metastatic gene A protein) (Putative transmembrane protein NMA)	BAMBI NMA	Homo sapiens (Human)	260
Q8NDB2	BANK1_HUMAN	reviewed	B-cell scaffold protein with ankyrin repeats	BANK1	Homo sapiens (Human)	785
Q8N9N5	BANP_HUMAN	reviewed	Protein BANP (BEN domain-containing protein 1) (Btg3-associated nuclear protein) (Scaffold/matrix-associated region-1-binding protein)	BANP BEND1 SMAR1	Homo sapiens (Human)	519
Q8IXM2	BAP18_HUMAN	reviewed	Chromatin complexes subunit BAP18 (BPTF-associated protein of 18 kDa)	BAP18 C17orf49	Homo sapiens (Human)	172
Q92560	BAP1_HUMAN	reviewed	Ubiquitin carboxyl-terminal hydrolase BAP1 (EC 3.4.19.12) (BRCA1-associated protein 1) (Cerebral protein 6)	BAP1 KIAA0272 hucep-6	Homo sapiens (Human)	729
Q9UHQ4	BAP29_HUMAN	reviewed	B-cell receptor-associated protein 29 (BCR-associated protein 29) (Bap29)	BCAP29 BAP29	Homo sapiens (Human)	241
P51572	BAP31_HUMAN	reviewed	B-cell receptor-associated protein 31 (BCR-associated protein 31) (Bap31) (6C6-AG tumor-associated antigen) (Protein CDM) (p28)	BCAP31 BAP31 DXS1357E	Homo sapiens (Human)	246
Q99728	BARD1_HUMAN	reviewed	BRCA1-associated RING domain protein 1 (BARD-1) (EC 6.3.2.-)	BARD1	Homo sapiens (Human)	777
Q9BZE3	BARH1_HUMAN	reviewed	BarH-like 1 homeobox protein	BARHL1 FKSG31	Homo sapiens (Human)	327
Q9NY43	BARH2_HUMAN	reviewed	BarH-like 2 homeobox protein	BARHL2	Homo sapiens (Human)	387
Q9HBU1	BARX1_HUMAN	reviewed	Homeobox protein BarH-like 1	BARX1	Homo sapiens (Human)	254
Q9UMQ3	BARX2_HUMAN	reviewed	Homeobox protein BarH-like 2	BARX2	Homo sapiens (Human)	279
P35613	BASI_HUMAN	reviewed	Basigin (5F7) (Collagenase stimulatory factor) (Extracellular matrix metalloproteinase inducer) (EMMPRIN) (Leukocyte activation antigen M6) (OK blood group antigen) (Tumor cell-derived collagenase stimulatory factor) (TCSF) (CD antigen CD147)	BSG UNQ6505/PRO21383	Homo sapiens (Human)	385
P80723	BASP1_HUMAN	reviewed	Brain acid soluble protein 1 (22 kDa neuronal tissue-enriched acidic protein) (Neuronal axonal membrane protein NAP-22)	BASP1 NAP22	Homo sapiens (Human)	227
P82251	BAT1_HUMAN	reviewed	B(0,+)-type amino acid transporter 1 (B(0,+)AT) (Glycoprotein-associated amino acid transporter b0,+AT1) (Solute carrier family 7 member 9)	SLC7A9 BAT1	Homo sapiens (Human)	487
Q8N1L9	BATF2_HUMAN	reviewed	Basic leucine zipper transcriptional factor ATF-like 2 (B-ATF-2) (Suppressor of AP-1 regulated by IFN) (SARI)	BATF2	Homo sapiens (Human)	274
Q9NR55	BATF3_HUMAN	reviewed	Basic leucine zipper transcriptional factor ATF-like 3 (B-ATF-3) (21 kDa small nuclear factor isolated from T-cells) (Jun dimerization protein p21SNFT)	BATF3 SNFT	Homo sapiens (Human)	127
Q16520	BATF_HUMAN	reviewed	Basic leucine zipper transcriptional factor ATF-like (B-cell-activating transcription factor) (B-ATF) (SF-HT-activated gene 2 protein) (SFA-2)	BATF	Homo sapiens (Human)	125
Q07812	BAX_HUMAN	reviewed	Apoptosis regulator BAX (Bcl-2-like protein 4) (Bcl2-L-4)	BAX BCL2L4	Homo sapiens (Human)	192
Q9NRL2	BAZ1A_HUMAN	reviewed	Bromodomain adjacent to zinc finger domain protein 1A (ATP-dependent chromatin-remodeling protein) (ATP-utilizing chromatin assembly and remodeling factor 1) (hACF1) (CHRAC subunit ACF1) (Williams syndrome transcription factor-related chromatin-remodeling factor 180) (WCRF180) (hWALp1)	BAZ1A ACF1 WCRF180 HSPC317	Homo sapiens (Human)	1556
Q9UIG0	BAZ1B_HUMAN	reviewed	Tyrosine-protein kinase BAZ1B (EC 2.7.10.2) (Bromodomain adjacent to zinc finger domain protein 1B) (Williams syndrome transcription factor) (Williams-Beuren syndrome chromosomal region 10 protein) (Williams-Beuren syndrome chromosomal region 9 protein) (hWALp2)	BAZ1B WBSC10 WBSCR10 WBSCR9 WSTF	Homo sapiens (Human)	1483
Q9UIF9	BAZ2A_HUMAN	reviewed	Bromodomain adjacent to zinc finger domain protein 2A (Transcription termination factor I-interacting protein 5) (TTF-I-interacting protein 5) (Tip5) (hWALp3)	BAZ2A KIAA0314 TIP5	Homo sapiens (Human)	1905
Q9UIF8	BAZ2B_HUMAN	reviewed	Bromodomain adjacent to zinc finger domain protein 2B (hWALp4)	BAZ2B KIAA1476	Homo sapiens (Human)	2168
Q96PG8	BBC3B_HUMAN	reviewed	Bcl-2-binding component 3 (JFY-1) (p53 up-regulated modulator of apoptosis)	BBC3 PUMA	Homo sapiens (Human)	261
Q9BXH1	BBC3_HUMAN	reviewed	Bcl-2-binding component 3 (JFY-1) (p53 up-regulated modulator of apoptosis)	BBC3 PUMA	Homo sapiens (Human)	193
A8MTZ0	BBIP1_HUMAN	reviewed	BBSome-interacting protein 1 (BBSome-interacting protein of 10 kDa)	BBIP1 BBIP10 NCRNA00081	Homo sapiens (Human)	92
Q8TAM1	BBS10_HUMAN	reviewed	Bardet-Biedl syndrome 10 protein	BBS10 C12orf58	Homo sapiens (Human)	723
Q6ZW61	BBS12_HUMAN	reviewed	Bardet-Biedl syndrome 12 protein	BBS12 C4orf24	Homo sapiens (Human)	710
Q8NFJ9	BBS1_HUMAN	reviewed	Bardet-Biedl syndrome 1 protein (BBS2-like protein 2)	BBS1 BBS2L2	Homo sapiens (Human)	593
Q9BXC9	BBS2_HUMAN	reviewed	Bardet-Biedl syndrome 2 protein	BBS2	Homo sapiens (Human)	721
Q96RK4	BBS4_HUMAN	reviewed	Bardet-Biedl syndrome 4 protein	BBS4	Homo sapiens (Human)	519
Q8N3I7	BBS5_HUMAN	reviewed	Bardet-Biedl syndrome 5 protein	BBS5	Homo sapiens (Human)	341
Q8IWZ6	BBS7_HUMAN	reviewed	Bardet-Biedl syndrome 7 protein (BBS2-like protein 1)	BBS7 BBS2L1	Homo sapiens (Human)	715
Q8WY36	BBX_HUMAN	reviewed	HMG box transcription factor BBX (Bobby sox homolog) (HMG box-containing protein 2)	BBX HBP2	Homo sapiens (Human)	941
Q9H165	BC11A_HUMAN	reviewed	B-cell lymphoma/leukemia 11A (BCL-11A) (B-cell CLL/lymphoma 11A) (COUP-TF-interacting protein 1) (Ecotropic viral integration site 9 protein homolog) (EVI-9) (Zinc finger protein 856)	BCL11A CTIP1 EVI9 KIAA1809 ZNF856	Homo sapiens (Human)	835
Q9C0K0	BC11B_HUMAN	reviewed	B-cell lymphoma/leukemia 11B (BCL-11B) (B-cell CLL/lymphoma 11B) (COUP-TF-interacting protein 2) (Radiation-induced tumor suppressor gene 1 protein) (hRit1)	BCL11B CTIP2 RIT1	Homo sapiens (Human)	894
P50895	BCAM_HUMAN	reviewed	Basal cell adhesion molecule (Auberger B antigen) (B-CAM cell surface glycoprotein) (F8/G253 antigen) (Lutheran antigen) (Lutheran blood group glycoprotein) (CD antigen CD239)	BCAM LU MSK19	Homo sapiens (Human)	628
Q6ZUJ8	BCAP_HUMAN	reviewed	Phosphoinositide 3-kinase adapter protein 1 (B-cell adapter for phosphoinositide 3-kinase) (B-cell phosphoinositide 3-kinase adapter protein 1)	PIK3AP1 BCAP	Homo sapiens (Human)	805
P56945	BCAR1_HUMAN	reviewed	Breast cancer anti-estrogen resistance protein 1 (CRK-associated substrate) (Cas scaffolding protein family member 1) (p130cas)	BCAR1 CAS CASS1 CRKAS	Homo sapiens (Human)	870
O75815	BCAR3_HUMAN	reviewed	Breast cancer anti-estrogen resistance protein 3 (Novel SH2-containing protein 2) (SH2 domain-containing protein 3B)	BCAR3 NSP2 SH2D3B UNQ271/PRO308	Homo sapiens (Human)	825
O75363	BCAS1_HUMAN	reviewed	Breast carcinoma-amplified sequence 1 (Amplified and overexpressed in breast cancer) (Novel amplified in breast cancer 1)	BCAS1 AIBC1 NABC1	Homo sapiens (Human)	584
Q9H6U6	BCAS3_HUMAN	reviewed	Breast carcinoma-amplified sequence 3 (GAOB1)	BCAS3	Homo sapiens (Human)	928
Q8TDM0	BCAS4_HUMAN	reviewed	Breast carcinoma-amplified sequence 4	BCAS4	Homo sapiens (Human)	211
P54687	BCAT1_HUMAN	reviewed	Branched-chain-amino-acid aminotransferase, cytosolic (BCAT(c)) (EC 2.6.1.42) (Protein ECA39)	BCAT1 BCT1 ECA39	Homo sapiens (Human)	386
O15382	BCAT2_HUMAN	reviewed	Branched-chain-amino-acid aminotransferase, mitochondrial (BCAT(m)) (EC 2.6.1.42) (Placental protein 18) (PP18)	BCAT2 BCATM BCT2 ECA40	Homo sapiens (Human)	392
Q9P287	BCCIP_HUMAN	reviewed	BRCA2 and CDKN1A-interacting protein (P21- and CDK-associated protein 1) (Protein TOK-1)	BCCIP TOK1	Homo sapiens (Human)	314
Q9NWK9	BCD1_HUMAN	reviewed	Box C/D snoRNA protein 1 (Serologically defined breast cancer antigen NY-BR-75) (Zinc finger HIT domain-containing protein 6)	ZNHIT6 BCD1 C1orf181	Homo sapiens (Human)	470
Q9HAY6	BCDO1_HUMAN	reviewed	Beta,beta-carotene 15,15'-monooxygenase (EC 1.14.99.36) (Beta-carotene dioxygenase 1)	BCMO1 BCDO BCDO1	Homo sapiens (Human)	547
Q9BYV7	BCDO2_HUMAN	reviewed	Beta,beta-carotene 9',10'-oxygenase (EC 1.13.11.71) (B-diox-II) (Beta-carotene dioxygenase 2)	BCO2 BCDO2	Homo sapiens (Human)	579
O60756	BCE1_HUMAN	reviewed	Putative protein BCE-1	BCE1	Homo sapiens (Human)	84
O14874	BCKD_HUMAN	reviewed	[3-methyl-2-oxobutanoate dehydrogenase [lipoamide]] kinase, mitochondrial (EC 2.7.11.4) (Branched-chain alpha-ketoacid dehydrogenase kinase) (BCKD-kinase) (BCKDHKIN)	BCKDK	Homo sapiens (Human)	412
O95999	BCL10_HUMAN	reviewed	B-cell lymphoma/leukemia 10 (B-cell CLL/lymphoma 10) (Bcl-10) (CARD-containing molecule enhancing NF-kappa-B) (CARD-like apoptotic protein) (hCLAP) (CED-3/ICH-1 prodomain homologous E10-like regulator) (CIPER) (Cellular homolog of vCARMEN) (cCARMEN) (Cellular-E10) (c-E10) (Mammalian CARD-containing adapter molecule E10) (mE10)	BCL10 CIPER CLAP	Homo sapiens (Human)	233
P10415	BCL2_HUMAN	reviewed	Apoptosis regulator Bcl-2	BCL2	Homo sapiens (Human)	239
P20749	BCL3_HUMAN	reviewed	B-cell lymphoma 3 protein (BCL-3) (Proto-oncogene BCL3)	BCL3 BCL4 D19S37	Homo sapiens (Human)	454
Q8N143	BCL6B_HUMAN	reviewed	B-cell CLL/lymphoma 6 member B protein (Bcl6-associated zinc finger protein) (Zinc finger protein 62)	BCL6B BAZF ZNF62	Homo sapiens (Human)	479
P41182	BCL6_HUMAN	reviewed	B-cell lymphoma 6 protein (BCL-6) (B-cell lymphoma 5 protein) (BCL-5) (Protein LAZ-3) (Zinc finger and BTB domain-containing protein 27) (Zinc finger protein 51)	BCL6 BCL5 LAZ3 ZBTB27 ZNF51	Homo sapiens (Human)	706
Q4VC05	BCL7A_HUMAN	reviewed	B-cell CLL/lymphoma 7 protein family member A	BCL7A	Homo sapiens (Human)	210
Q9BQE9	BCL7B_HUMAN	reviewed	B-cell CLL/lymphoma 7 protein family member B (allergen Hom s 3)	BCL7B	Homo sapiens (Human)	202
Q8WUZ0	BCL7C_HUMAN	reviewed	B-cell CLL/lymphoma 7 protein family member C	BCL7C	Homo sapiens (Human)	217
P0C6P0	BCL8_HUMAN	reviewed	Putative protein BCL8 (Neurobeachin pseudogene 1)	NBEAP1 BCL8 BCL8A	Homo sapiens (Human)	100
Q86UU0	BCL9L_HUMAN	reviewed	B-cell CLL/lymphoma 9-like protein (B-cell lymphoma 9-like protein) (BCL9-like protein) (Protein BCL9-2)	BCL9L DLNB11	Homo sapiens (Human)	1499
O00512	BCL9_HUMAN	reviewed	B-cell CLL/lymphoma 9 protein (B-cell lymphoma 9 protein) (Bcl-9) (Protein legless homolog)	BCL9	Homo sapiens (Human)	1426
Q9NYF8	BCLF1_HUMAN	reviewed	Bcl-2-associated transcription factor 1 (Btf)	BCLAF1 BTF KIAA0164	Homo sapiens (Human)	920
Q8N888	BCOR2_HUMAN	reviewed	Putative BCoR-like protein 2 (BCL-6 corepressor pseudogene 1) (BCL-6 corepressor-like protein 2)	BCORP1 BCORL2	Homo sapiens (Human)	145
Q5H9F3	BCORL_HUMAN	reviewed	BCL-6 corepressor-like protein 1 (BCoR-L1) (BCoR-like protein 1)	BCORL1	Homo sapiens (Human)	1711
Q6W2J9	BCOR_HUMAN	reviewed	BCL-6 corepressor (BCoR)	BCOR KIAA1575	Homo sapiens (Human)	1755
P11274	BCR_HUMAN	reviewed	Breakpoint cluster region protein (EC 2.7.11.1) (Renal carcinoma antigen NY-REN-26)	BCR BCR1 D22S11	Homo sapiens (Human)	1271
Q9Y276	BCS1_HUMAN	reviewed	Mitochondrial chaperone BCS1 (h-BCS1) (BCS1-like protein)	BCS1L BCS1	Homo sapiens (Human)	419
Q8NFC6	BD1L1_HUMAN	reviewed	Biorientation of chromosomes in cell division protein 1-like 1 (Protein FAM44A)	BOD1L1 BOD1L FAM44A KIAA1327	Homo sapiens (Human)	3051
Q8IYS8	BD1L2_HUMAN	reviewed	Putative biorientation of chromosomes in cell division protein 1-like 2 (Putative biorientation of chromosomes in cell division protein 1 pseudogene) (Putative protein FAM44C)	BOD1L2 BOD1P FAM44C	Homo sapiens (Human)	172
Q9BUT1	BDH2_HUMAN	reviewed	3-hydroxybutyrate dehydrogenase type 2 (EC 1.1.1.-) (EC 1.1.1.30) (Dehydrogenase/reductase SDR family member 6) (Oxidoreductase UCPA) (R-beta-hydroxybutyrate dehydrogenase)	BDH2 DHRS6 UNQ6308/PRO20933	Homo sapiens (Human)	245
Q02338	BDH_HUMAN	reviewed	D-beta-hydroxybutyrate dehydrogenase, mitochondrial (BDH) (EC 1.1.1.30) (3-hydroxybutyrate dehydrogenase)	BDH1 BDH	Homo sapiens (Human)	343
P23560	BDNF_HUMAN	reviewed	Brain-derived neurotrophic factor (BDNF) (Abrineurin)	BDNF	Homo sapiens (Human)	247
A6H8Y1	BDP1_HUMAN	reviewed	Transcription factor TFIIIB component B'' homolog (Transcription factor IIIB 150) (TFIIIB150) (Transcription factor-like nuclear regulator)	BDP1 KIAA1241 KIAA1689 TFNR	Homo sapiens (Human)	2624
Q3B7T3	BEAN1_HUMAN	reviewed	Protein BEAN1 (Brain-expressed protein associating with Nedd4 homolog) (BEAN)	BEAN1	Homo sapiens (Human)	259
Q14457	BECN1_HUMAN	reviewed	Beclin-1 (Coiled-coil myosin-like BCL2-interacting protein) (Protein GT197)	BECN1 GT197	Homo sapiens (Human)	450
A8MW95	BECP1_HUMAN	reviewed	Putative beclin-1-like protein (Beclin-1 autophagy-related pseudogene 1)	BECN1P1	Homo sapiens (Human)	431
Q9BUH8	BEGIN_HUMAN	reviewed	Brain-enriched guanylate kinase-associated protein	BEGAIN KIAA1446	Homo sapiens (Human)	593
Q8NDZ0	BEND2_HUMAN	reviewed	BEN domain-containing protein 2	BEND2 CXorf20	Homo sapiens (Human)	799
Q5T5X7	BEND3_HUMAN	reviewed	BEN domain-containing protein 3	BEND3 KIAA1553	Homo sapiens (Human)	828
Q6ZU67	BEND4_HUMAN	reviewed	BEN domain-containing protein 4 (Coiled-coil domain-containing protein 4)	BEND4 CCDC4	Homo sapiens (Human)	534
Q7L4P6	BEND5_HUMAN	reviewed	BEN domain-containing protein 5	BEND5 C1orf165	Homo sapiens (Human)	421
Q5SZJ8	BEND6_HUMAN	reviewed	BEN domain-containing protein 6	BEND6 C6orf65	Homo sapiens (Human)	279
Q8N7W2	BEND7_HUMAN	reviewed	BEN domain-containing protein 7	BEND7 C10orf30	Homo sapiens (Human)	519
O76090	BEST1_HUMAN	reviewed	Bestrophin-1 (TU15B) (Vitelliform macular dystrophy protein 2)	BEST1 VMD2	Homo sapiens (Human)	585
Q8NFU1	BEST2_HUMAN	reviewed	Bestrophin-2 (Vitelliform macular dystrophy 2-like protein 1)	BEST2 VMD2L1	Homo sapiens (Human)	509
Q8N1M1	BEST3_HUMAN	reviewed	Bestrophin-3 (Vitelliform macular dystrophy 2-like protein 3)	BEST3 VMD2L3	Homo sapiens (Human)	668
Q8NFU0	BEST4_HUMAN	reviewed	Bestrophin-4 (Vitelliform macular dystrophy 2-like protein 2)	BEST4 VMD2L2	Homo sapiens (Human)	473
Q9NYM9	BET1L_HUMAN	reviewed	BET1-like protein (Golgi SNARE with a size of 15 kDa) (GOS-15) (GS15) (Vesicle transport protein GOS15)	BET1L GS15	Homo sapiens (Human)	111
O15155	BET1_HUMAN	reviewed	BET1 homolog (hBET1) (Golgi vesicular membrane-trafficking protein p18)	BET1	Homo sapiens (Human)	118
Q9HBH7	BEX1_HUMAN	reviewed	Protein BEX1 (Brain-expressed X-linked protein 1)	BEX1	Homo sapiens (Human)	125
Q9BXY8	BEX2_HUMAN	reviewed	Protein BEX2 (Brain-expressed X-linked protein 2) (hBex2)	BEX2	Homo sapiens (Human)	128
Q00994	BEX3_HUMAN	reviewed	Protein BEX3 (Brain-expressed X-linked protein 3) (Nerve growth factor receptor-associated protein 1) (Ovarian granulosa cell 13.0 kDa protein HGR74) (p75NTR-associated cell death executor)	NGFRAP1 BEX3 DXS6984E NADE	Homo sapiens (Human)	111
Q9NWD9	BEX4_HUMAN	reviewed	Protein BEX4 (BEX1-like protein 1) (Brain-expressed X-linked protein 4) (Nerve growth factor receptor-associated protein 3)	BEX4 BEXL1 NADE3	Homo sapiens (Human)	120
Q5H9J7	BEX5_HUMAN	reviewed	Protein BEX5 (Brain-expressed X-linked protein 5) (NGFRAP1-like protein 1) (Nerve growth factor receptor-associated protein 2)	BEX5 NADE2 NGFRAP1L1	Homo sapiens (Human)	111
Q9NZS9	BFAR_HUMAN	reviewed	Bifunctional apoptosis regulator (RING finger protein 47)	BFAR BAR RNF47	Homo sapiens (Human)	450
Q12934	BFSP1_HUMAN	reviewed	Filensin (Beaded filament structural protein 1) (Lens fiber cell beaded-filament structural protein CP 115) (CP115) (Lens intermediate filament-like heavy) (LIFL-H)	BFSP1	Homo sapiens (Human)	665
Q13515	BFSP2_HUMAN	reviewed	Phakinin (49 kDa cytoskeletal protein) (Beaded filament structural protein 2) (Lens fiber cell beaded filament protein CP 47) (CP47) (Lens fiber cell beaded filament protein CP 49) (CP49) (Lens intermediate filament-like light) (LIFL-L)	BFSP2	Homo sapiens (Human)	415
P16278	BGAL_HUMAN	reviewed	Beta-galactosidase (EC 3.2.1.23) (Acid beta-galactosidase) (Lactase) (Elastin receptor 1)	GLB1 ELNR1	Homo sapiens (Human)	677
P16442	BGAT_HUMAN	reviewed	Histo-blood group ABO system transferase (Fucosylglycoprotein 3-alpha-galactosyltransferase) (Fucosylglycoprotein alpha-N-acetylgalactosaminyltransferase) (Glycoprotein-fucosylgalactoside alpha-N-acetylgalactosaminyltransferase) (EC 2.4.1.40) (Glycoprotein-fucosylgalactoside alpha-galactosyltransferase) (EC 2.4.1.37) (Histo-blood group A transferase) (A transferase) (Histo-blood group B transfera…	ABO	Homo sapiens (Human)	354
Q15582	BGH3_HUMAN	reviewed	Transforming growth factor-beta-induced protein ig-h3 (Beta ig-h3) (Kerato-epithelin) (RGD-containing collagen-associated protein) (RGD-CAP)	TGFBI BIGH3	Homo sapiens (Human)	683
P08236	BGLR_HUMAN	reviewed	Beta-glucuronidase (EC 3.2.1.31) (Beta-G1)	GUSB	Homo sapiens (Human)	651
Q7RTU4	BHA09_HUMAN	reviewed	Class A basic helix-loop-helix protein 9 (bHLHa9) (Class F basic helix-loop-helix factor 42) (bHLHf42)	BHLHA9 BHLHF42	Homo sapiens (Human)	235
Q7RTS1	BHA15_HUMAN	reviewed	Class A basic helix-loop-helix protein 15 (bHLHa15) (Class B basic helix-loop-helix protein 8) (bHLHb8) (Muscle, intestine and stomach expression 1) (MIST-1)	BHLHA15 BHLHB8 MIST1	Homo sapiens (Human)	189
Q8NFJ8	BHE22_HUMAN	reviewed	Class E basic helix-loop-helix protein 22 (bHLHe22) (Class B basic helix-loop-helix protein 5) (bHLHb5) (Trinucleotide repeat-containing gene 20 protein)	BHLHE22 BHLHB5 TNRC20	Homo sapiens (Human)	381
Q8NDY6	BHE23_HUMAN	reviewed	Class E basic helix-loop-helix protein 23 (bHLHe23) (Class B basic helix-loop-helix protein 4) (bHLHb4)	BHLHE23 BHLHB4	Homo sapiens (Human)	225
O14503	BHE40_HUMAN	reviewed	Class E basic helix-loop-helix protein 40 (bHLHe40) (Class B basic helix-loop-helix protein 2) (bHLHb2) (Differentially expressed in chondrocytes protein 1) (DEC1) (Enhancer-of-split and hairy-related protein 2) (SHARP-2) (Stimulated by retinoic acid gene 13 protein)	BHLHE40 BHLHB2 DEC1 SHARP2 STRA13	Homo sapiens (Human)	412
Q9C0J9	BHE41_HUMAN	reviewed	Class E basic helix-loop-helix protein 41 (bHLHe41) (Class B basic helix-loop-helix protein 3) (bHLHb3) (Differentially expressed in chondrocytes protein 2) (hDEC2) (Enhancer-of-split and hairy-related protein 1) (SHARP-1)	BHLHE41 BHLHB3 DEC2 SHARP1	Homo sapiens (Human)	482
Q6PI77	BHLH9_HUMAN	reviewed	Protein BHLHb9 (bHLHb9) (Transcription regulator of 60 kDa) (p60TRP)	BHLHB9 KIAA1701	Homo sapiens (Human)	547
Q93088	BHMT1_HUMAN	reviewed	Betaine--homocysteine S-methyltransferase 1 (EC 2.1.1.5)	BHMT	Homo sapiens (Human)	406
Q9H2M3	BHMT2_HUMAN	reviewed	S-methylmethionine--homocysteine S-methyltransferase BHMT2 (SMM-hcy methyltransferase) (EC 2.1.1.5) (Betaine--homocysteine S-methyltransferase 2)	BHMT2	Homo sapiens (Human)	363
P55061	BI1_HUMAN	reviewed	Bax inhibitor 1 (BI-1) (Testis-enhanced gene transcript protein) (Transmembrane BAX inhibitor motif-containing protein 6)	TMBIM6 BI1 TEGT	Homo sapiens (Human)	237
Q9UHR4	BI2L1_HUMAN	reviewed	Brain-specific angiogenesis inhibitor 1-associated protein 2-like protein 1 (BAI1-associated protein 2-like protein 1) (Insulin receptor tyrosine kinase substrate)	BAIAP2L1 IRTKS	Homo sapiens (Human)	511
Q6UXY1	BI2L2_HUMAN	reviewed	Brain-specific angiogenesis inhibitor 1-associated protein 2-like protein 2 (BAI1-associated protein 2-like protein 2) (Planar intestinal- and kidney-specific BAR domain protein) (Pinkbar)	BAIAP2L2 UNQ9336/PRO34007	Homo sapiens (Human)	529
Q9H694	BICC1_HUMAN	reviewed	Protein bicaudal C homolog 1 (Bic-C)	BICC1	Homo sapiens (Human)	974
Q96G01	BICD1_HUMAN	reviewed	Protein bicaudal D homolog 1 (Bic-D 1)	BICD1	Homo sapiens (Human)	975
Q8TD16	BICD2_HUMAN	reviewed	Protein bicaudal D homolog 2 (Bic-D 2)	BICD2 KIAA0699	Homo sapiens (Human)	824
Q6ZP65	BICR1_HUMAN	reviewed	Bicaudal D-related protein 1 (BICD-related protein 1) (BICDR-1) (Coiled-coil domain-containing protein 64A)	CCDC64 BICDR1	Homo sapiens (Human)	573
A1A5D9	BICR2_HUMAN	reviewed	Bicaudal D-related protein 2 (BICD-related protein 2) (BICDR-2) (Coiled-coil domain-containing protein 64B)	CCDC64B BICDR2	Homo sapiens (Human)	508
P55957	BID_HUMAN	reviewed	BH3-interacting domain death agonist (p22 BID) (BID) [Cleaved into: BH3-interacting domain death agonist p15 (p15 BID); BH3-interacting domain death agonist p13 (p13 BID); BH3-interacting domain death agonist p11 (p11 BID)]	BID	Homo sapiens (Human)	195
P53004	BIEA_HUMAN	reviewed	Biliverdin reductase A (BVR A) (EC 1.3.1.24) (Biliverdin-IX alpha-reductase)	BLVRA BLVR BVR	Homo sapiens (Human)	296
Q9Y6D6	BIG1_HUMAN	reviewed	Brefeldin A-inhibited guanine nucleotide-exchange protein 1 (Brefeldin A-inhibited GEP 1) (ADP-ribosylation factor guanine nucleotide-exchange factor 1) (p200 ARF guanine nucleotide exchange factor) (p200 ARF-GEP1)	ARFGEF1 ARFGEP1 BIG1	Homo sapiens (Human)	1849
Q9Y6D5	BIG2_HUMAN	reviewed	Brefeldin A-inhibited guanine nucleotide-exchange protein 2 (Brefeldin A-inhibited GEP 2) (ADP-ribosylation factor guanine nucleotide-exchange factor 2)	ARFGEF2 ARFGEP2 BIG2	Homo sapiens (Human)	1785
Q5TH69	BIG3_HUMAN	reviewed	Brefeldin A-inhibited guanine nucleotide-exchange protein 3	ARFGEF3 BIG3 C6orf92 KIAA1244	Homo sapiens (Human)	2177
Q13323	BIK_HUMAN	reviewed	Bcl-2-interacting killer (Apoptosis inducer NBK) (BIP1) (BP4)	BIK NBK	Homo sapiens (Human)	160
O00499	BIN1_HUMAN	reviewed	Myc box-dependent-interacting protein 1 (Amphiphysin II) (Amphiphysin-like protein) (Box-dependent myc-interacting protein 1) (Bridging integrator 1)	BIN1 AMPHL	Homo sapiens (Human)	593
Q9UBW5	BIN2_HUMAN	reviewed	Bridging integrator 2 (Breast cancer-associated protein 1)	BIN2 BRAP1	Homo sapiens (Human)	565
Q9NQY0	BIN3_HUMAN	reviewed	Bridging integrator 3	BIN3	Homo sapiens (Human)	253
Q96LW7	BINCA_HUMAN	reviewed	Bcl10-interacting CARD protein (BinCARD)	C9orf89	Homo sapiens (Human)	228
Q13075	BIRC1_HUMAN	reviewed	Baculoviral IAP repeat-containing protein 1 (Neuronal apoptosis inhibitory protein)	NAIP BIRC1	Homo sapiens (Human)	1403
Q13490	BIRC2_HUMAN	reviewed	Baculoviral IAP repeat-containing protein 2 (EC 6.3.2.-) (C-IAP1) (IAP homolog B) (Inhibitor of apoptosis protein 2) (IAP-2) (hIAP-2) (hIAP2) (RING finger protein 48) (TNFR2-TRAF-signaling complex protein 2)	BIRC2 API1 IAP2 MIHB RNF48	Homo sapiens (Human)	618
Q13489	BIRC3_HUMAN	reviewed	Baculoviral IAP repeat-containing protein 3 (EC 6.3.2.-) (Apoptosis inhibitor 2) (API2) (C-IAP2) (IAP homolog C) (Inhibitor of apoptosis protein 1) (IAP-1) (hIAP-1) (hIAP1) (RING finger protein 49) (TNFR2-TRAF-signaling complex protein 1)	BIRC3 API2 IAP1 MIHC RNF49	Homo sapiens (Human)	604
O15392	BIRC5_HUMAN	reviewed	Baculoviral IAP repeat-containing protein 5 (Apoptosis inhibitor 4) (Apoptosis inhibitor survivin)	BIRC5 API4 IAP4	Homo sapiens (Human)	142
Q9NR09	BIRC6_HUMAN	reviewed	Baculoviral IAP repeat-containing protein 6 (EC 6.3.2.-) (BIR repeat-containing ubiquitin-conjugating enzyme) (BRUCE) (Ubiquitin-conjugating BIR domain enzyme apollon) (APOLLON)	BIRC6 KIAA1289	Homo sapiens (Human)	4857
Q96CA5	BIRC7_HUMAN	reviewed	Baculoviral IAP repeat-containing protein 7 (EC 6.3.2.-) (Kidney inhibitor of apoptosis protein) (KIAP) (Livin) (Melanoma inhibitor of apoptosis protein) (ML-IAP) (RING finger protein 50) [Cleaved into: Baculoviral IAP repeat-containing protein 7 30kDa subunit (Truncated livin) (p30-Livin) (tLivin)]	BIRC7 KIAP LIVIN MLIAP RNF50 UNQ5800/PRO19607/PRO21344	Homo sapiens (Human)	298
Q96P09	BIRC8_HUMAN	reviewed	Baculoviral IAP repeat-containing protein 8 (Inhibitor of apoptosis-like protein 2) (IAP-like protein 2) (ILP-2) (Testis-specific inhibitor of apoptosis)	BIRC8 ILP2	Homo sapiens (Human)	236
Q86UB2	BIVM_HUMAN	reviewed	Basic immunoglobulin-like variable motif-containing protein	BIVM	Homo sapiens (Human)	503
P46663	BKRB1_HUMAN	reviewed	B1 bradykinin receptor (B1R) (BK-1 receptor)	BDKRB1 BRADYB1	Homo sapiens (Human)	353
P30411	BKRB2_HUMAN	reviewed	B2 bradykinin receptor (B2R) (BK-2 receptor)	BDKRB2 BKR2	Homo sapiens (Human)	391
P78537	BL1S1_HUMAN	reviewed	Biogenesis of lysosome-related organelles complex 1 subunit 1 (BLOC-1 subunit 1) (GCN5-like protein 1) (Protein RT14)	BLOC1S1 BLOS1 GCN5L1 RT14	Homo sapiens (Human)	153
Q6QNY1	BL1S2_HUMAN	reviewed	Biogenesis of lysosome-related organelles complex 1 subunit 2 (BLOC-1 subunit 2) (Centrosome-associated protein)	BLOC1S2 BLOS2 CEAP	Homo sapiens (Human)	142
Q6QNY0	BL1S3_HUMAN	reviewed	Biogenesis of lysosome-related organelles complex 1 subunit 3 (BLOC-1 subunit 3)	BLOC1S3 BLOS3	Homo sapiens (Human)	202
Q9NUP1	BL1S4_HUMAN	reviewed	Biogenesis of lysosome-related organelles complex 1 subunit 4 (BLOC-1 subunit 4) (Protein cappuccino homolog)	BLOC1S4 CNO	Homo sapiens (Human)	217
Q8TDH9	BL1S5_HUMAN	reviewed	Biogenesis of lysosome-related organelles complex 1 subunit 5 (BLOC-1 subunit 5) (Protein Muted homolog)	BLOC1S5 MUTED	Homo sapiens (Human)	187
Q9UL45	BL1S6_HUMAN	reviewed	Biogenesis of lysosome-related organelles complex 1 subunit 6 (BLOC-1 subunit 6) (Pallid protein homolog) (Pallidin) (Syntaxin 13-interacting protein)	BLOC1S6 PA PLDN	Homo sapiens (Human)	172
A4D250	BLACE_HUMAN	reviewed	B-cell acute lymphoblastic leukemia-expressed protein	BLACE	Homo sapiens (Human)	179
P62952	BLCAP_HUMAN	reviewed	Bladder cancer-associated protein (Bladder cancer 10 kDa protein) (Bc10)	BLCAP BC10	Homo sapiens (Human)	87
Q8IZY5	BLID_HUMAN	reviewed	BH3-like motif-containing cell death inducer (Breast cancer cell protein 2)	BLID BRCC2	Homo sapiens (Human)	108
P51451	BLK_HUMAN	reviewed	Tyrosine-protein kinase Blk (EC 2.7.10.2) (B lymphocyte kinase) (p55-Blk)	BLK	Homo sapiens (Human)	505
Q13867	BLMH_HUMAN	reviewed	Bleomycin hydrolase (BH) (BLM hydrolase) (BMH) (EC 3.4.22.40)	BLMH	Homo sapiens (Human)	455
A8MY62	BLML_HUMAN	reviewed	Putative beta-lactamase-like 1	LACTBL1	Homo sapiens (Human)	500
P54132	BLM_HUMAN	reviewed	Bloom syndrome protein (EC 3.6.4.12) (DNA helicase, RecQ-like type 2) (RecQ2) (RecQ protein-like 3)	BLM RECQ2 RECQL3	Homo sapiens (Human)	1417
Q8WV28	BLNK_HUMAN	reviewed	B-cell linker protein (B-cell adapter containing a SH2 domain protein) (B-cell adapter containing a Src homology 2 domain protein) (Cytoplasmic adapter protein) (Src homology 2 domain-containing leukocyte protein of 65 kDa) (SLP-65)	BLNK BASH SLP65	Homo sapiens (Human)	456
P30043	BLVRB_HUMAN	reviewed	Flavin reductase (NADPH) (FR) (EC 1.5.1.30) (Biliverdin reductase B) (BVR-B) (EC 1.3.1.24) (Biliverdin-IX beta-reductase) (Green heme-binding protein) (GHBP) (NADPH-dependent diaphorase) (NADPH-flavin reductase) (FLR)	BLVRB FLR	Homo sapiens (Human)	206
Q5H9B9	BM2KL_HUMAN	reviewed	Putative BMP-2-inducible kinase-like protein	BMP2KL	Homo sapiens (Human)	411
O00327	BMAL1_HUMAN	reviewed	Aryl hydrocarbon receptor nuclear translocator-like protein 1 (Basic-helix-loop-helix-PAS protein MOP3) (Brain and muscle ARNT-like 1) (Class E basic helix-loop-helix protein 5) (bHLHe5) (Member of PAS protein 3) (PAS domain-containing protein 3) (bHLH-PAS protein JAP3)	ARNTL BHLHE5 BMAL1 MOP3 PASD3	Homo sapiens (Human)	626
Q8WYA1	BMAL2_HUMAN	reviewed	Aryl hydrocarbon receptor nuclear translocator-like protein 2 (Basic-helix-loop-helix-PAS protein MOP9) (Brain and muscle ARNT-like 2) (CYCLE-like factor) (CLIF) (Class E basic helix-loop-helix protein 6) (bHLHe6) (Member of PAS protein 9) (PAS domain-containing protein 9)	ARNTL2 BHLHE6 BMAL2 CLIF MOP9 PASD9	Homo sapiens (Human)	636
Q96LC9	BMF_HUMAN	reviewed	Bcl-2-modifying factor	BMF	Homo sapiens (Human)	184
P35226	BMI1_HUMAN	reviewed	Polycomb complex protein BMI-1 (Polycomb group RING finger protein 4) (RING finger protein 51)	BMI1 PCGF4 RNF51	Homo sapiens (Human)	326
O95393	BMP10_HUMAN	reviewed	Bone morphogenetic protein 10 (BMP-10)	BMP10	Homo sapiens (Human)	424
O95972	BMP15_HUMAN	reviewed	Bone morphogenetic protein 15 (BMP-15) (Growth/differentiation factor 9B) (GDF-9B)	BMP15 GDF9B	Homo sapiens (Human)	392
P13497	BMP1_HUMAN	reviewed	Bone morphogenetic protein 1 (BMP-1) (EC 3.4.24.19) (Mammalian tolloid protein) (mTld) (Procollagen C-proteinase) (PCP)	BMP1 PCOLC	Homo sapiens (Human)	986
Q9NSY1	BMP2K_HUMAN	reviewed	BMP-2-inducible protein kinase (BIKe) (EC 2.7.11.1)	BMP2K BIKE HRIHFB2017	Homo sapiens (Human)	1161
P12643	BMP2_HUMAN	reviewed	Bone morphogenetic protein 2 (BMP-2) (Bone morphogenetic protein 2A) (BMP-2A)	BMP2 BMP2A	Homo sapiens (Human)	396
P55107	BMP3B_HUMAN	reviewed	Bone morphogenetic protein 3B (BMP-3B) (Bone-inducing protein) (BIP) (Growth/differentiation factor 10) (GDF-10)	GDF10 BMP3B	Homo sapiens (Human)	478
P12645	BMP3_HUMAN	reviewed	Bone morphogenetic protein 3 (BMP-3) (Bone morphogenetic protein 3A) (BMP-3A) (Osteogenin)	BMP3 BMP3A	Homo sapiens (Human)	472
P12644	BMP4_HUMAN	reviewed	Bone morphogenetic protein 4 (BMP-4) (Bone morphogenetic protein 2B) (BMP-2B)	BMP4 BMP2B DVR4	Homo sapiens (Human)	408
P22003	BMP5_HUMAN	reviewed	Bone morphogenetic protein 5 (BMP-5)	BMP5	Homo sapiens (Human)	454
P22004	BMP6_HUMAN	reviewed	Bone morphogenetic protein 6 (BMP-6) (VG-1-related protein) (VG-1-R) (VGR-1)	BMP6 VGR	Homo sapiens (Human)	513
P18075	BMP7_HUMAN	reviewed	Bone morphogenetic protein 7 (BMP-7) (Osteogenic protein 1) (OP-1) (Eptotermin alfa)	BMP7 OP1	Homo sapiens (Human)	431
Q7Z5Y6	BMP8A_HUMAN	reviewed	Bone morphogenetic protein 8A (BMP-8A)	BMP8A	Homo sapiens (Human)	402
P34820	BMP8B_HUMAN	reviewed	Bone morphogenetic protein 8B (BMP-8) (BMP-8B) (Osteogenic protein 2) (OP-2)	BMP8B BMP8	Homo sapiens (Human)	402
Q8N8U9	BMPER_HUMAN	reviewed	BMP-binding endothelial regulator protein (Bone morphogenetic protein-binding endothelial cell precursor-derived regulator) (Protein crossveinless-2) (hCV2)	BMPER KIAA1965	Homo sapiens (Human)	685
Q13873	BMPR2_HUMAN	reviewed	Bone morphogenetic protein receptor type-2 (BMP type-2 receptor) (BMPR-2) (EC 2.7.11.30) (Bone morphogenetic protein receptor type II) (BMP type II receptor) (BMPR-II)	BMPR2 PPH1	Homo sapiens (Human)	1038
P36894	BMR1A_HUMAN	reviewed	Bone morphogenetic protein receptor type-1A (BMP type-1A receptor) (BMPR-1A) (EC 2.7.11.30) (Activin receptor-like kinase 3) (ALK-3) (Serine/threonine-protein kinase receptor R5) (SKR5) (CD antigen CD292)	BMPR1A ACVRLK3 ALK3	Homo sapiens (Human)	532
O00238	BMR1B_HUMAN	reviewed	Bone morphogenetic protein receptor type-1B (BMP type-1B receptor) (BMPR-1B) (EC 2.7.11.30) (CD antigen CDw293)	BMPR1B	Homo sapiens (Human)	502
Q14692	BMS1_HUMAN	reviewed	Ribosome biogenesis protein BMS1 homolog (Ribosome assembly protein BMS1 homolog)	BMS1 BMS1L KIAA0187	Homo sapiens (Human)	1282
P51813	BMX_HUMAN	reviewed	Cytoplasmic tyrosine-protein kinase BMX (EC 2.7.10.2) (Bone marrow tyrosine kinase gene in chromosome X protein) (Epithelial and endothelial tyrosine kinase) (ETK) (NTK38)	BMX	Homo sapiens (Human)	675
Q7Z5W3	BN3D2_HUMAN	reviewed	Pre-miRNA 5'-monophosphate methyltransferase (EC 2.1.1.-) (BCDIN3 domain-containing protein)	BCDIN3D	Homo sapiens (Human)	292
Q01954	BNC1_HUMAN	reviewed	Zinc finger protein basonuclin-1	BNC1 BNC	Homo sapiens (Human)	994
Q6ZN30	BNC2_HUMAN	reviewed	Zinc finger protein basonuclin-2	BNC2	Homo sapiens (Human)	1099
O60238	BNI3L_HUMAN	reviewed	BCL2/adenovirus E1B 19 kDa protein-interacting protein 3-like (Adenovirus E1B19K-binding protein B5) (BCL2/adenovirus E1B 19 kDa protein-interacting protein 3A) (NIP3-like protein X) (NIP3L)	BNIP3L BNIP3A BNIP3H NIX	Homo sapiens (Human)	219
Q12982	BNIP2_HUMAN	reviewed	BCL2/adenovirus E1B 19 kDa protein-interacting protein 2	BNIP2 NIP2	Homo sapiens (Human)	314
Q12983	BNIP3_HUMAN	reviewed	BCL2/adenovirus E1B 19 kDa protein-interacting protein 3	BNIP3 NIP3	Homo sapiens (Human)	194
Q7Z465	BNIPL_HUMAN	reviewed	Bcl-2/adenovirus E1B 19 kDa-interacting protein 2-like protein	BNIPL	Homo sapiens (Human)	357
Q9BWV1	BOC_HUMAN	reviewed	Brother of CDO (Protein BOC)	BOC UNQ604/PRO1190	Homo sapiens (Human)	1114
Q96IK1	BOD1_HUMAN	reviewed	Biorientation of chromosomes in cell division protein 1 (Biorientation defective protein 1) (Protein FAM44B)	BOD1 FAM44B	Homo sapiens (Human)	185
O75936	BODG_HUMAN	reviewed	Gamma-butyrobetaine dioxygenase (EC 1.14.11.1) (Gamma-butyrobetaine hydroxylase) (Gamma-BBH) (Gamma-butyrobetaine,2-oxoglutarate dioxygenase)	BBOX1 BBH BBOX	Homo sapiens (Human)	387
Q9UMX3	BOK_HUMAN	reviewed	Bcl-2-related ovarian killer protein (hBOK) (Bcl-2-like protein 9) (Bcl2-L-9)	BOK BCL2L9	Homo sapiens (Human)	212
Q9Y3E2	BOLA1_HUMAN	reviewed	BolA-like protein 1 (hBolA)	BOLA1 CGI-143	Homo sapiens (Human)	137
Q9H3K6	BOLA2_HUMAN	reviewed	BolA-like protein 2	BOLA2 BOLA2A My016; BOLA2B	Homo sapiens (Human)	86
Q53S33	BOLA3_HUMAN	reviewed	BolA-like protein 3	BOLA3	Homo sapiens (Human)	107
Q8N9W6	BOLL_HUMAN	reviewed	Protein boule-like	BOLL BOULE	Homo sapiens (Human)	283
Q14137	BOP1_HUMAN	reviewed	Ribosome biogenesis protein BOP1 (Block of proliferation 1 protein)	BOP1 KIAA0124	Homo sapiens (Human)	746
Q7L3V2	BOP_HUMAN	reviewed	Protein Bop (BH3-only protein)	BOP C22orf29	Homo sapiens (Human)	364
Q6PGQ7	BORA_HUMAN	reviewed	Protein aurora borealis (HsBora)	BORA C13orf34	Homo sapiens (Human)	559
Q53HL2	BOREA_HUMAN	reviewed	Borealin (Cell division cycle-associated protein 8) (Dasra-B) (hDasra-B) (Pluripotent embryonic stem cell-related gene 3 protein)	CDCA8 PESCRG3	Homo sapiens (Human)	280
O14613	BORG1_HUMAN	reviewed	Cdc42 effector protein 2 (Binder of Rho GTPases 1)	CDC42EP2 BORG1 CEP2	Homo sapiens (Human)	210
Q9UKI2	BORG2_HUMAN	reviewed	Cdc42 effector protein 3 (Binder of Rho GTPases 2) (MSE55-related Cdc42-binding protein)	CDC42EP3 BORG2 CEP3	Homo sapiens (Human)	254
Q6NZY7	BORG3_HUMAN	reviewed	Cdc42 effector protein 5 (Binder of Rho GTPases 3)	CDC42EP5 BORG3 CEP5	Homo sapiens (Human)	148
Q9H3Q1	BORG4_HUMAN	reviewed	Cdc42 effector protein 4 (Binder of Rho GTPases 4)	CDC42EP4 BORG4 CEP4	Homo sapiens (Human)	356
Q00587	BORG5_HUMAN	reviewed	Cdc42 effector protein 1 (Binder of Rho GTPases 5) (Serum protein MSE55)	CDC42EP1 BORG5 CEP1 MSE55	Homo sapiens (Human)	391
Q9GZL8	BPEC1_HUMAN	reviewed	Putative BPES syndrome breakpoint region protein (BPES candidate 1)	BPESC1	Homo sapiens (Human)	116
Q86WA6	BPHL_HUMAN	reviewed	Valacyclovir hydrolase (VACVase) (Valacyclovirase) (EC 3.1.-.-) (Biphenyl hydrolase-like protein) (Biphenyl hydrolase-related protein) (Bph-rp) (Breast epithelial mucin-associated antigen) (MCNAA)	BPHL MCNAA	Homo sapiens (Human)	291
Q9NP55	BPIA1_HUMAN	reviewed	BPI fold-containing family A member 1 (Lung-specific protein X) (Nasopharyngeal carcinoma-related protein) (Palate lung and nasal epithelium clone protein) (Secretory protein in upper respiratory tracts) (Tracheal epithelium-enriched protein) (Von Ebner protein Hl)	BPIFA1 LUNX NASG PLUNC SPURT UNQ787/PRO1606	Homo sapiens (Human)	256
Q96DR5	BPIA2_HUMAN	reviewed	BPI fold-containing family A member 2 (Parotid secretory protein) (PSP) (Short palate, lung and nasal epithelium carcinoma-associated protein 2)	BPIFA2 C20orf70 SPLUNC2 UNQ510/PRO1025	Homo sapiens (Human)	249
Q9BQP9	BPIA3_HUMAN	reviewed	BPI fold-containing family A member 3 (Short palate, lung and nasal epithelium carcinoma-associated protein 3)	BPIFA3 C20orf71 SPLUNC3	Homo sapiens (Human)	254
Q8TDL5	BPIB1_HUMAN	reviewed	BPI fold-containing family B member 1 (Long palate, lung and nasal epithelium carcinoma-associated protein 1) (Von Ebner minor salivary gland protein) (VEMSGP)	BPIFB1 C20orf114 LPLUNC1 UNQ706/PRO1357	Homo sapiens (Human)	484
Q8N4F0	BPIB2_HUMAN	reviewed	BPI fold-containing family B member 2 (Bactericidal/permeability-increasing protein-like 1) (BPI-like 1) (Long palate, lung and nasal epithelium carcinoma-associated protein 2) (RYSR)	BPIFB2 BPIL1 C20orf184 LPLUNC2 UNQ2489/PRO5776	Homo sapiens (Human)	458
P59826	BPIB3_HUMAN	reviewed	BPI fold-containing family B member 3 (Ligand-binding protein RYA3) (Long palate, lung and nasal epithelium carcinoma-associated protein 3)	BPIFB3 C20orf185 LPLUNC3	Homo sapiens (Human)	476
P59827	BPIB4_HUMAN	reviewed	BPI fold-containing family B member 4 (Ligand-binding protein RY2G5) (Long palate, lung and nasal epithelium carcinoma-associated protein 4)	BPIFB4 C20orf186 LPLUNC4	Homo sapiens (Human)	614
Q8NFQ5	BPIB6_HUMAN	reviewed	BPI fold-containing family B member 6 (Bactericidal/permeability-increasing protein-like 3)	BPIFB6 BPIL3	Homo sapiens (Human)	453
Q8NFQ6	BPIFC_HUMAN	reviewed	BPI fold-containing family C protein (Bactericidal/permeability-increasing protein-like 2) (BPI-like 2)	BPIFC BPIL2	Homo sapiens (Human)	507
P17213	BPI_HUMAN	reviewed	Bactericidal permeability-increasing protein (BPI) (CAP 57)	BPI	Homo sapiens (Human)	487
P50747	BPL1_HUMAN	reviewed	Biotin--protein ligase (EC 6.3.4.-) (Biotin apo-protein ligase) [Includes: Biotin--[methylmalonyl-CoA-carboxytransferase] ligase (EC 6.3.4.9); Biotin--[propionyl-CoA-carboxylase [ATP-hydrolyzing]] ligase (EC 6.3.4.10) (Holocarboxylase synthetase) (HCS); Biotin--[methylcrotonoyl-CoA-carboxylase] ligase (EC 6.3.4.11); Biotin--[acetyl-CoA-carboxylase] ligase (EC 6.3.4.15)]	HLCS	Homo sapiens (Human)	726
O95861	BPNT1_HUMAN	reviewed	3'(2'),5'-bisphosphate nucleotidase 1 (EC 3.1.3.7) (Bisphosphate 3'-nucleotidase 1) (PAP-inositol 1,4-phosphatase) (PIP)	BPNT1	Homo sapiens (Human)	308
Q12830	BPTF_HUMAN	reviewed	Nucleosome-remodeling factor subunit BPTF (Bromodomain and PHD finger-containing transcription factor) (Fetal Alz-50 clone 1 protein) (Fetal Alzheimer antigen)	BPTF FAC1 FALZ	Homo sapiens (Human)	3046
O15178	BRAC_HUMAN	reviewed	Brachyury protein (Protein T)	T	Homo sapiens (Human)	435
P15056	BRAF_HUMAN	reviewed	Serine/threonine-protein kinase B-raf (EC 2.7.11.1) (Proto-oncogene B-Raf) (p94) (v-Raf murine sarcoma viral oncogene homolog B1)	BRAF BRAF1 RAFB1	Homo sapiens (Human)	766
Q7Z569	BRAP_HUMAN	reviewed	BRCA1-associated protein (EC 6.3.2.-) (BRAP2) (Impedes mitogenic signal propagation) (IMP) (RING finger protein 52) (Renal carcinoma antigen NY-REN-63)	BRAP RNF52	Homo sapiens (Human)	592
Q6PJG6	BRAT1_HUMAN	reviewed	BRCA1-associated ATM activator 1 (BRCA1-associated protein required for ATM activation protein 1)	BRAT1 BAAT1 C7orf27	Homo sapiens (Human)	821
P38398	BRCA1_HUMAN	reviewed	Breast cancer type 1 susceptibility protein (EC 6.3.2.-) (RING finger protein 53)	BRCA1 RNF53	Homo sapiens (Human)	1863
P51587	BRCA2_HUMAN	reviewed	Breast cancer type 2 susceptibility protein (Fanconi anemia group D1 protein)	BRCA2 FACD FANCD1	Homo sapiens (Human)	3418
P46736	BRCC3_HUMAN	reviewed	Lys-63-specific deubiquitinase BRCC36 (EC 3.4.19.-) (BRCA1-A complex subunit BRCC36) (BRCA1/BRCA2-containing complex subunit 3) (BRCA1/BRCA2-containing complex subunit 36) (BRISC complex subunit BRCC36)	BRCC3 BRCC36 C6.1A CXorf53	Homo sapiens (Human)	316
O95696	BRD1_HUMAN	reviewed	Bromodomain-containing protein 1 (BR140-like protein) (Bromodomain and PHD finger-containing protein 2)	BRD1 BRL BRPF2	Homo sapiens (Human)	1058
P25440	BRD2_HUMAN	reviewed	Bromodomain-containing protein 2 (O27.1.1) (Really interesting new gene 3 protein)	BRD2 KIAA9001 RING3	Homo sapiens (Human)	801
Q15059	BRD3_HUMAN	reviewed	Bromodomain-containing protein 3 (RING3-like protein)	BRD3 KIAA0043 RING3L	Homo sapiens (Human)	726
O60885	BRD4_HUMAN	reviewed	Bromodomain-containing protein 4 (Protein HUNK1)	BRD4 HUNK1	Homo sapiens (Human)	1362
Q9NPI1	BRD7_HUMAN	reviewed	Bromodomain-containing protein 7 (75 kDa bromodomain protein) (Protein CELTIX-1)	BRD7 BP75 CELTIX1	Homo sapiens (Human)	651
Q9H0E9	BRD8_HUMAN	reviewed	Bromodomain-containing protein 8 (Skeletal muscle abundant protein) (Skeletal muscle abundant protein 2) (Thyroid hormone receptor coactivating protein of 120 kDa) (TrCP120) (p120)	BRD8 SMAP SMAP2	Homo sapiens (Human)	1235
Q9H8M2	BRD9_HUMAN	reviewed	Bromodomain-containing protein 9 (Rhabdomyosarcoma antigen MU-RMS-40.8)	BRD9 UNQ3040/PRO9856	Homo sapiens (Human)	597
Q58F21	BRDT_HUMAN	reviewed	Bromodomain testis-specific protein (Cancer/testis antigen 9) (CT9) (RING3-like protein)	BRDT	Homo sapiens (Human)	947
Q5VTR2	BRE1A_HUMAN	reviewed	E3 ubiquitin-protein ligase BRE1A (BRE1-A) (hBRE1) (EC 6.3.2.-) (RING finger protein 20)	RNF20 BRE1A	Homo sapiens (Human)	975
O75150	BRE1B_HUMAN	reviewed	E3 ubiquitin-protein ligase BRE1B (BRE1-B) (EC 6.3.2.-) (95 kDa retinoblastoma-associated protein) (RBP95) (RING finger protein 40)	RNF40 BRE1B KIAA0661	Homo sapiens (Human)	1001
Q9NXR7	BRE_HUMAN	reviewed	BRCA1-A complex subunit BRE (BRCA1/BRCA2-containing complex subunit 45) (Brain and reproductive organ-expressed protein)	BRE BRCC45	Homo sapiens (Human)	383
Q9HAW0	BRF2_HUMAN	reviewed	Transcription factor IIIB 50 kDa subunit (TFIIIB50) (hTFIIIB50) (B-related factor 2) (BRF-2) (hBRFU)	BRF2 BRFU PRO1470	Homo sapiens (Human)	419
Q8WY22	BRI3B_HUMAN	reviewed	BRI3-binding protein (I3-binding protein) (Cervical cancer 1 proto-oncogene-binding protein KG19) (HCCRBP-1)	BRI3BP KG19	Homo sapiens (Human)	251
O95415	BRI3_HUMAN	reviewed	Brain protein I3 (pRGR2)	BRI3	Homo sapiens (Human)	125
Q6PL45	BRID5_HUMAN	reviewed	BRICHOS domain-containing protein 5	BRICD5 C16orf79	Homo sapiens (Human)	260
P59051	BRIT2_HUMAN	reviewed	Putative uncharacterized protein encoded by BRWD1-IT2 (BRWD1 intronic transcript 2)	BRWD1-IT2 C21orf87 NCRNA00257	Homo sapiens (Human)	145
Q8WUW1	BRK1_HUMAN	reviewed	Protein BRICK1 (BRK1)	BRK1 C3orf10 HSPC300 MDS027	Homo sapiens (Human)	75
Q5PSV4	BRM1L_HUMAN	reviewed	Breast cancer metastasis-suppressor 1-like protein (BRMS1-homolog protein p40) (BRMS1-like protein p40)	BRMS1L	Homo sapiens (Human)	323
Q9HCU9	BRMS1_HUMAN	reviewed	Breast cancer metastasis-suppressor 1	BRMS1	Homo sapiens (Human)	246
Q96NH3	BROMI_HUMAN	reviewed	Protein broad-minded	BROMI C6orf170 C6orf171	Homo sapiens (Human)	1257
Q5VW32	BROX_HUMAN	reviewed	BRO1 domain-containing protein BROX (BRO1 domain- and CAAX motif-containing protein)	BROX BROFTI C1orf58	Homo sapiens (Human)	411
P55201	BRPF1_HUMAN	reviewed	Peregrin (Bromodomain and PHD finger-containing protein 1) (Protein Br140)	BRPF1 BR140	Homo sapiens (Human)	1214
Q9ULD4	BRPF3_HUMAN	reviewed	Bromodomain and PHD finger-containing protein 3	BRPF3 KIAA1286	Homo sapiens (Human)	1205
P32247	BRS3_HUMAN	reviewed	Bombesin receptor subtype-3 (BRS-3)	BRS3	Homo sapiens (Human)	399
Q8TDC3	BRSK1_HUMAN	reviewed	Serine/threonine-protein kinase BRSK1 (EC 2.7.11.1) (Brain-selective kinase 1) (EC 2.7.11.26) (Brain-specific serine/threonine-protein kinase 1) (BR serine/threonine-protein kinase 1) (Serine/threonine-protein kinase SAD-B) (Synapses of Amphids Defective homolog 1) (SAD1 homolog) (hSAD1)	BRSK1 KIAA1811 SAD1 SADB	Homo sapiens (Human)	778
Q8IWQ3	BRSK2_HUMAN	reviewed	Serine/threonine-protein kinase BRSK2 (EC 2.7.11.1) (Brain-selective kinase 2) (EC 2.7.11.26) (Brain-specific serine/threonine-protein kinase 2) (BR serine/threonine-protein kinase 2) (Serine/threonine-protein kinase 29) (Serine/threonine-protein kinase SAD-A)	BRSK2 C11orf7 PEN11B SADA STK29 HUSSY-12	Homo sapiens (Human)	736
Q9NSI6	BRWD1_HUMAN	reviewed	Bromodomain and WD repeat-containing protein 1 (WD repeat-containing protein 9)	BRWD1 C21orf107 WDR9	Homo sapiens (Human)	2320
Q6RI45	BRWD3_HUMAN	reviewed	Bromodomain and WD repeat-containing protein 3	BRWD3	Homo sapiens (Human)	1802
Q8TDN6	BRX1_HUMAN	reviewed	Ribosome biogenesis protein BRX1 homolog (Brix domain-containing protein 2)	BRIX1 BRIX BXDC2	Homo sapiens (Human)	353
Q96G97	BSCL2_HUMAN	reviewed	Seipin (Bernardinelli-Seip congenital lipodystrophy type 2 protein)	BSCL2	Homo sapiens (Human)	398
Q9NW68	BSDC1_HUMAN	reviewed	BSD domain-containing protein 1	BSDC1 UNQ2494/PRO5781	Homo sapiens (Human)	430
Q3C1V8	BSH_HUMAN	reviewed	Brain-specific homeobox protein homolog	BSX BSX1	Homo sapiens (Human)	233
Q8WZ55	BSND_HUMAN	reviewed	Barttin	BSND BART	Homo sapiens (Human)	320
Q9UPA5	BSN_HUMAN	reviewed	Protein bassoon (Zinc finger protein 231)	BSN KIAA0434 ZNF231	Homo sapiens (Human)	3926
Q075Z2	BSPH1_HUMAN	reviewed	Binder of sperm protein homolog 1 (Bovine seminal plasma protein homolog 1) (Bovine seminal plasma protein-like 1)	BSPH1	Homo sapiens (Human)	132
Q5W0U4	BSPRY_HUMAN	reviewed	B box and SPRY domain-containing protein	BSPRY	Homo sapiens (Human)	402
Q9GZN4	BSSP4_HUMAN	reviewed	Brain-specific serine protease 4 (BSSP-4) (EC 3.4.21.-) (Serine protease 22) (Serine protease 26) (Tryptase epsilon)	PRSS22 BSSP4 PRSS26 SP001LA UNQ302/PRO343	Homo sapiens (Human)	317
Q10588	BST1_HUMAN	reviewed	ADP-ribosyl cyclase 2 (EC 3.2.2.5) (Bone marrow stromal antigen 1) (BST-1) (Cyclic ADP-ribose hydrolase 2) (cADPr hydrolase 2) (CD antigen CD157)	BST1	Homo sapiens (Human)	318
Q10589	BST2_HUMAN	reviewed	Bone marrow stromal antigen 2 (BST-2) (HM1.24 antigen) (Tetherin) (CD antigen CD317)	BST2	Homo sapiens (Human)	180
Q13410	BT1A1_HUMAN	reviewed	Butyrophilin subfamily 1 member A1 (BT)	BTN1A1 BTN	Homo sapiens (Human)	526
Q7KYR7	BT2A1_HUMAN	reviewed	Butyrophilin subfamily 2 member A1	BTN2A1 BT2.1 BTF1	Homo sapiens (Human)	527
Q8WVV5	BT2A2_HUMAN	reviewed	Butyrophilin subfamily 2 member A2	BTN2A2 BT2.2 BTF2	Homo sapiens (Human)	523
Q96KV6	BT2A3_HUMAN	reviewed	Putative butyrophilin subfamily 2 member A3	BTN2A3P BTN2A3	Homo sapiens (Human)	586
O00481	BT3A1_HUMAN	reviewed	Butyrophilin subfamily 3 member A1 (CD antigen CD277)	BTN3A1 BTF5	Homo sapiens (Human)	513
P78410	BT3A2_HUMAN	reviewed	Butyrophilin subfamily 3 member A2	BTN3A2 BT3.2 BTF3 BTF4	Homo sapiens (Human)	334
O00478	BT3A3_HUMAN	reviewed	Butyrophilin subfamily 3 member A3	BTN3A3 BTF3	Homo sapiens (Human)	584
Q96K17	BT3L4_HUMAN	reviewed	Transcription factor BTF3 homolog 4 (Basic transcription factor 3-like 4)	BTF3L4	Homo sapiens (Human)	158
O14981	BTAF1_HUMAN	reviewed	TATA-binding protein-associated factor 172 (EC 3.6.4.-) (ATP-dependent helicase BTAF1) (B-TFIID transcription factor-associated 170 kDa subunit) (TAF(II)170) (TBP-associated factor 172) (TAF-172)	BTAF1 TAF172	Homo sapiens (Human)	1849
Q9H0C5	BTBD1_HUMAN	reviewed	BTB/POZ domain-containing protein 1 (Hepatitis C virus NS5A-transactivated protein 8) (HCV NS5A-transactivated protein 8)	BTBD1 C15orf1 NS5ATP8	Homo sapiens (Human)	482
Q9BX70	BTBD2_HUMAN	reviewed	BTB/POZ domain-containing protein 2	BTBD2	Homo sapiens (Human)	525
Q9Y2F9	BTBD3_HUMAN	reviewed	BTB/POZ domain-containing protein 3	BTBD3 KIAA0952	Homo sapiens (Human)	522
Q96KE9	BTBD6_HUMAN	reviewed	BTB/POZ domain-containing protein 6 (Lens BTB domain protein)	BTBD6 BDPL	Homo sapiens (Human)	485
Q9P203	BTBD7_HUMAN	reviewed	BTB/POZ domain-containing protein 7	BTBD7 KIAA1525	Homo sapiens (Human)	1132
Q5XKL5	BTBD8_HUMAN	reviewed	BTB/POZ domain-containing protein 8	BTBD8	Homo sapiens (Human)	378
Q96Q07	BTBD9_HUMAN	reviewed	BTB/POZ domain-containing protein 9	BTBD9 KIAA1880	Homo sapiens (Human)	612
Q9BSF8	BTBDA_HUMAN	reviewed	BTB/POZ domain-containing protein 10	BTBD10	Homo sapiens (Human)	475
A6QL63	BTBDB_HUMAN	reviewed	Ankyrin repeat and BTB/POZ domain-containing protein BTBD11 (BTB/POZ domain-containing protein 11)	BTBD11	Homo sapiens (Human)	1104
Q32M84	BTBDG_HUMAN	reviewed	BTB/POZ domain-containing protein 16	BTBD16 C10orf87	Homo sapiens (Human)	506
A6NE02	BTBDH_HUMAN	reviewed	BTB/POZ domain-containing protein 17 (Galectin-3-binding protein-like)	BTBD17	Homo sapiens (Human)	478
B2RXH4	BTBDI_HUMAN	reviewed	BTB/POZ domain-containing protein 18	BTBD18	Homo sapiens (Human)	712
C9JJ37	BTBDJ_HUMAN	reviewed	BTB/POZ domain-containing protein 19	BTBD19	Homo sapiens (Human)	291
P35070	BTC_HUMAN	reviewed	Probetacellulin [Cleaved into: Betacellulin (BTC)]	BTC	Homo sapiens (Human)	178
P43251	BTD_HUMAN	reviewed	Biotinidase (Biotinase) (EC 3.5.1.12)	BTD	Homo sapiens (Human)	543
P20290	BTF3_HUMAN	reviewed	Transcription factor BTF3 (RNA polymerase B transcription factor 3)	BTF3 NACB OK/SW-cl.8	Homo sapiens (Human)	206
P62324	BTG1_HUMAN	reviewed	Protein BTG1 (B-cell translocation gene 1 protein)	BTG1	Homo sapiens (Human)	171
P78543	BTG2_HUMAN	reviewed	Protein BTG2 (BTG family member 2) (NGF-inducible anti-proliferative protein PC3)	BTG2 PC3	Homo sapiens (Human)	158
Q14201	BTG3_HUMAN	reviewed	Protein BTG3 (Abundant in neuroepithelium area protein) (BTG family member 3) (Protein Tob5)	BTG3 ANA TOB5	Homo sapiens (Human)	252
Q9NY30	BTG4_HUMAN	reviewed	Protein BTG4 (BTG family member 4) (Protein PC3b)	BTG4 PC3B	Homo sapiens (Human)	223
Q06187	BTK_HUMAN	reviewed	Tyrosine-protein kinase BTK (EC 2.7.10.2) (Agammaglobulinemia tyrosine kinase) (ATK) (B-cell progenitor kinase) (BPK) (Bruton tyrosine kinase)	BTK AGMX1 ATK BPK	Homo sapiens (Human)	659
Q7Z6A9	BTLA_HUMAN	reviewed	B- and T-lymphocyte attenuator (B- and T-lymphocyte-associated protein) (CD antigen CD272)	BTLA	Homo sapiens (Human)	289
Q9UIR0	BTNL2_HUMAN	reviewed	Butyrophilin-like protein 2 (BTL-II)	BTNL2	Homo sapiens (Human)	455
Q6UXE8	BTNL3_HUMAN	reviewed	Butyrophilin-like protein 3 (Butyrophilin-like receptor)	BTNL3 BTNLR COLF4100 UNQ744/PRO1472	Homo sapiens (Human)	466
Q6UX41	BTNL8_HUMAN	reviewed	Butyrophilin-like protein 8	BTNL8 UNQ702/PRO1347	Homo sapiens (Human)	500
Q6UXG8	BTNL9_HUMAN	reviewed	Butyrophilin-like protein 9	BTNL9 UNQ1900/PRO4346	Homo sapiens (Human)	535
A8MVZ5	BTNLA_HUMAN	reviewed	Butyrophilin-like protein 10	BTNL10	Homo sapiens (Human)	291
O60566	BUB1B_HUMAN	reviewed	Mitotic checkpoint serine/threonine-protein kinase BUB1 beta (EC 2.7.11.1) (MAD3/BUB1-related protein kinase) (hBUBR1) (Mitotic checkpoint kinase MAD3L) (Protein SSK1)	BUB1B BUBR1 MAD3L SSK1	Homo sapiens (Human)	1050
O43683	BUB1_HUMAN	reviewed	Mitotic checkpoint serine/threonine-protein kinase BUB1 (hBUB1) (EC 2.7.11.1) (BUB1A)	BUB1 BUB1L	Homo sapiens (Human)	1085
O43684	BUB3_HUMAN	reviewed	Mitotic checkpoint protein BUB3	BUB3	Homo sapiens (Human)	328
Q9BRD0	BUD13_HUMAN	reviewed	BUD13 homolog	BUD13	Homo sapiens (Human)	619
P41223	BUD31_HUMAN	reviewed	Protein BUD31 homolog (Protein EDG-2) (Protein G10 homolog)	BUD31 EDG2	Homo sapiens (Human)	144
Q9UBR1	BUP1_HUMAN	reviewed	Beta-ureidopropionase (EC 3.5.1.6) (BUP-1) (Beta-alanine synthase) (N-carbamoyl-beta-alanine amidohydrolase)	UPB1 BUP1	Homo sapiens (Human)	384
Q5T3Y7	BVAS1_HUMAN	reviewed	Putative uncharacterized protein BVES-AS1 (BVES antisense RNA 1) (BVES antisense gene protein 1)	BVES-AS1 C6orf112	Homo sapiens (Human)	98
Q8N1D0	BWR1B_HUMAN	reviewed	Beckwith-Wiedemann syndrome chromosomal region 1 candidate gene B protein (Organic cation transporter-like protein 2 antisense protein) (Solute carrier family 22 member 1-like antisense protein) (Solute carrier family 22 member 18 antisense protein) (p27-Beckwith-Wiedemann region 1 B) (p27-BWR1B)	SLC22A18AS BWR1B BWSCR1B ORCTL2S SLC22A1LS	Homo sapiens (Human)	253
O95971	BY55_HUMAN	reviewed	CD160 antigen (Natural killer cell receptor BY55) (CD antigen CD160)	CD160 BY55	Homo sapiens (Human)	181
Q13895	BYST_HUMAN	reviewed	Bystin	BYSL	Homo sapiens (Human)	437
Q7L1Q6	BZW1_HUMAN	reviewed	Basic leucine zipper and W2 domain-containing protein 1 (Protein Orf)	BZW1 BZAP45 KIAA0005	Homo sapiens (Human)	419
Q9Y6E2	BZW2_HUMAN	reviewed	Basic leucine zipper and W2 domain-containing protein 2	BZW2 HSPC028 MSTP017	Homo sapiens (Human)	419
Q96A19	C102A_HUMAN	reviewed	Coiled-coil domain-containing protein 102A	CCDC102A	Homo sapiens (Human)	550
Q68D86	C102B_HUMAN	reviewed	Coiled-coil domain-containing protein 102B	CCDC102B C18orf14	Homo sapiens (Human)	513
Q9NWR8	C109B_HUMAN	reviewed	Coiled-coil domain-containing protein 109B	CCDC109B	Homo sapiens (Human)	336
Q99622	C10_HUMAN	reviewed	Protein C10	C12orf57 C10	Homo sapiens (Human)	126
P15538	C11B1_HUMAN	reviewed	Cytochrome P450 11B1, mitochondrial (CYPXIB1) (Cytochrome P-450c11) (Cytochrome P450C11) (Steroid 11-beta-hydroxylase) (EC 1.14.15.4)	CYP11B1 S11BH	Homo sapiens (Human)	503
P19099	C11B2_HUMAN	reviewed	Cytochrome P450 11B2, mitochondrial (Aldosterone synthase) (ALDOS) (EC 1.14.15.4) (EC 1.14.15.5) (Aldosterone-synthesizing enzyme) (CYPXIB2) (Cytochrome P-450Aldo) (Cytochrome P-450C18) (Steroid 18-hydroxylase)	CYP11B2	Homo sapiens (Human)	503
A2RUR9	C144A_HUMAN	reviewed	Coiled-coil domain-containing protein 144A	CCDC144A KIAA0565	Homo sapiens (Human)	1427
Q3MJ40	C144B_HUMAN	reviewed	Coiled-coil domain-containing protein 144B	CCDC144B	Homo sapiens (Human)	725
Q8IYA2	C144C_HUMAN	reviewed	Coiled-coil domain-containing protein 144C	CCDC144C	Homo sapiens (Human)	1237
Q6NUI1	C144L_HUMAN	reviewed	Putative coiled-coil domain-containing protein 144 N-terminal-like	CCDC144NL	Homo sapiens (Human)	221
Q86VB7	C163A_HUMAN	reviewed	Scavenger receptor cysteine-rich type 1 protein M130 (Hemoglobin scavenger receptor) (CD antigen CD163) [Cleaved into: Soluble CD163 (sCD163)]	CD163 M130	Homo sapiens (Human)	1156
Q9NR16	C163B_HUMAN	reviewed	Scavenger receptor cysteine-rich type 1 protein M160 (CD163 antigen-like 1) (CD antigen CD163b)	CD163L1 CD163B M160 UNQ6434/PRO23202	Homo sapiens (Human)	1453
Q6UWJ8	C16L2_HUMAN	reviewed	CD164 sialomucin-like 2 protein	CD164L2 UNQ6122/PRO20044	Homo sapiens (Human)	174
Q9Y4F5	C170B_HUMAN	reviewed	Centrosomal protein of 170 kDa protein B (Centrosomal protein 170B) (Cep170B)	CEP170B FAM68C KIAA0284	Homo sapiens (Human)	1589
Q96L14	C170L_HUMAN	reviewed	Cep170-like protein (CEP170 pseudogene 1)	CEP170P1 CEP170L KIAA0470L	Homo sapiens (Human)	293
Q69YN2	C19L1_HUMAN	reviewed	CWF19-like protein 1	CWF19L1	Homo sapiens (Human)	538
Q2TBE0	C19L2_HUMAN	reviewed	CWF19-like protein 2	CWF19L2	Homo sapiens (Human)	894
Q8N1F1	C1AS1_HUMAN	reviewed	Putative uncharacterized protein C17orf76-AS1, mitochondrial (C17orf76 antisense RNA 1) (C17orf76 antisense gene protein 1)	C17orf76-AS1 C17orf45 NCRNA00188	Homo sapiens (Human)	130
Q13901	C1D_HUMAN	reviewed	Nuclear nucleic acid-binding protein C1D (hC1D)	C1D	Homo sapiens (Human)	141
Q96EU7	C1GLC_HUMAN	reviewed	C1GALT1-specific chaperone 1 (C38H2-like protein 1) (C38H2-L1) (Core 1 beta1,3-galactosyltransferase 2) (C1Gal-T2) (C1GalT2) (Core 1 beta3-Gal-T2) (Core 1 beta3-galactosyltransferase-specific molecular chaperone)	C1GALT1C1 COSMC HSPC067 MSTP143 UNQ273/PRO310	Homo sapiens (Human)	318
Q9NS00	C1GLT_HUMAN	reviewed	Glycoprotein-N-acetylgalactosamine 3-beta-galactosyltransferase 1 (EC 2.4.1.122) (B3Gal-T8) (Core 1 O-glycan T-synthase) (Core 1 UDP-galactose:N-acetylgalactosamine-alpha-R beta 1,3-galactosyltransferase 1) (Beta-1,3-galactosyltransferase) (Core 1 beta1,3-galactosyltransferase 1) (C1GalT1) (Core 1 beta3-Gal-T1)	C1GALT1	Homo sapiens (Human)	363
P02745	C1QA_HUMAN	reviewed	Complement C1q subcomponent subunit A	C1QA	Homo sapiens (Human)	245
Q07021	C1QBP_HUMAN	reviewed	Complement component 1 Q subcomponent-binding protein, mitochondrial (ASF/SF2-associated protein p32) (Glycoprotein gC1qBP) (C1qBP) (Hyaluronan-binding protein 1) (Mitochondrial matrix protein p32) (gC1q-R protein) (p33)	C1QBP GC1QBP HABP1 SF2P32	Homo sapiens (Human)	282
P02746	C1QB_HUMAN	reviewed	Complement C1q subcomponent subunit B	C1QB	Homo sapiens (Human)	253
P02747	C1QC_HUMAN	reviewed	Complement C1q subcomponent subunit C	C1QC C1QG	Homo sapiens (Human)	245
Q7Z5L3	C1QL2_HUMAN	reviewed	Complement C1q-like protein 2	C1QL2 CTRP10	Homo sapiens (Human)	287
Q5VWW1	C1QL3_HUMAN	reviewed	Complement C1q-like protein 3	C1QL3	Homo sapiens (Human)	255
Q86Z23	C1QL4_HUMAN	reviewed	Complement C1q-like protein 4	C1QL4	Homo sapiens (Human)	238
Q9NPY3	C1QR1_HUMAN	reviewed	Complement component C1q receptor (C1q/MBL/SPA receptor) (C1qR) (C1qR(p)) (C1qRp) (CDw93) (Complement component 1 q subcomponent receptor 1) (Matrix-remodeling-associated protein 4) (CD antigen CD93)	CD93 C1QR1 MXRA4	Homo sapiens (Human)	652
O75973	C1QRF_HUMAN	reviewed	C1q-related factor (Complement component 1 Q subcomponent-like 1)	C1QL1 C1QRF CRF	Homo sapiens (Human)	258
Q9BXJ1	C1QT1_HUMAN	reviewed	Complement C1q tumor necrosis factor-related protein 1 (G protein-coupled receptor-interacting protein) (GIP)	C1QTNF1 CTRP1 UNQ310/PRO353	Homo sapiens (Human)	281
Q9BXJ5	C1QT2_HUMAN	reviewed	Complement C1q tumor necrosis factor-related protein 2	C1QTNF2 CTRP2 UNQ6349/PRO21054	Homo sapiens (Human)	285
Q9BXJ4	C1QT3_HUMAN	reviewed	Complement C1q tumor necrosis factor-related protein 3 (Collagenous repeat-containing sequence 26 kDa protein) (CORS26) (Secretory protein CORS26)	C1QTNF3 CTRP3 UNQ753/PRO1484	Homo sapiens (Human)	246
Q9BXJ3	C1QT4_HUMAN	reviewed	Complement C1q tumor necrosis factor-related protein 4	C1QTNF4 CTRP4	Homo sapiens (Human)	329
Q9BXJ0	C1QT5_HUMAN	reviewed	Complement C1q tumor necrosis factor-related protein 5	C1QTNF5 CTRP5 UNQ303/PRO344	Homo sapiens (Human)	243
Q9BXI9	C1QT6_HUMAN	reviewed	Complement C1q tumor necrosis factor-related protein 6	C1QTNF6 CTRP6 UNQ581/PRO1151	Homo sapiens (Human)	259
Q9BXJ2	C1QT7_HUMAN	reviewed	Complement C1q tumor necrosis factor-related protein 7	C1QTNF7 CTRP7	Homo sapiens (Human)	289
P60827	C1QT8_HUMAN	reviewed	Complement C1q tumor necrosis factor-related protein 8 (C1q/TNF-related protein 8) (CTRP8)	C1QTNF8 UNQ5829/PRO19648	Homo sapiens (Human)	252
Q9NZP8	C1RL_HUMAN	reviewed	Complement C1r subcomponent-like protein (C1r-LP) (C1r-like protein) (EC 3.4.21.-) (C1r-like serine protease analog protein) (CLSPa)	C1RL C1RL1 C1RLP CLSPA	Homo sapiens (Human)	487
P00736	C1R_HUMAN	reviewed	Complement C1r subcomponent (EC 3.4.21.41) (Complement component 1 subcomponent r) [Cleaved into: Complement C1r subcomponent heavy chain; Complement C1r subcomponent light chain]	C1R	Homo sapiens (Human)	705
P09871	C1S_HUMAN	reviewed	Complement C1s subcomponent (EC 3.4.21.42) (C1 esterase) (Complement component 1 subcomponent s) [Cleaved into: Complement C1s subcomponent heavy chain; Complement C1s subcomponent light chain]	C1S	Homo sapiens (Human)	688
P0C862	C1T9A_HUMAN	reviewed	Complement C1q and tumor necrosis factor-related protein 9A (Complement C1q and tumor necrosis factor-related protein 9)	C1QTNF9 C1QTNF9A UNQ6503/PRO21380	Homo sapiens (Human)	333
B2RNN3	C1T9B_HUMAN	reviewed	Complement C1q and tumor necrosis factor-related protein 9B (C1q/TNF-related protein 9B) (CTRP9B) (Complement C1q and tumor necrosis factor-related protein 9-like)	C1QTNF9B	Homo sapiens (Human)	333
P11586	C1TC_HUMAN	reviewed	C-1-tetrahydrofolate synthase, cytoplasmic (C1-THF synthase) [Includes: Methylenetetrahydrofolate dehydrogenase (EC 1.5.1.5); Methenyltetrahydrofolate cyclohydrolase (EC 3.5.4.9); Formyltetrahydrofolate synthetase (EC 6.3.4.3)]	MTHFD1 MTHFC MTHFD	Homo sapiens (Human)	935
Q6UB35	C1TM_HUMAN	reviewed	Monofunctional C1-tetrahydrofolate synthase, mitochondrial (EC 6.3.4.3) (Formyltetrahydrofolate synthetase)	MTHFD1L FTHFSDC1	Homo sapiens (Human)	978
Q4G0S4	C27C1_HUMAN	reviewed	Cytochrome P450 27C1 (EC 1.14.-.-)	CYP27C1	Homo sapiens (Human)	372
Q96HQ2	C2AIL_HUMAN	reviewed	CDKN2AIP N-terminal-like protein (CDKN2A-interacting protein N-terminal-like protein)	CDKN2AIPNL	Homo sapiens (Human)	116
Q96NR2	C2AS1_HUMAN	reviewed	Putative uncharacterized protein C20orf166-AS1 (C20orf166 antisense RNA 1) (C20orf166 antisense gene protein 1)	C20orf166-AS1 C20orf200 NCRNA00335	Homo sapiens (Human)	134
O14523	C2C2L_HUMAN	reviewed	C2 domain-containing protein 2-like (Transmembrane protein 24)	C2CD2L KIAA0285 TMEM24 DLNB23	Homo sapiens (Human)	706
Q8NCU7	C2C4A_HUMAN	reviewed	C2 calcium-dependent domain-containing protein 4A (Nuclear-localized factor 1) (Protein FAM148A)	C2CD4A FAM148A NLF1	Homo sapiens (Human)	369
A6NLJ0	C2C4B_HUMAN	reviewed	C2 calcium-dependent domain-containing protein 4B (Nuclear-localized factor 2) (Protein FAM148B)	C2CD4B FAM148B NLF2	Homo sapiens (Human)	364
Q8TF44	C2C4C_HUMAN	reviewed	C2 calcium-dependent domain-containing protein 4C (Nuclear-localized factor 3) (Protein FAM148C)	C2CD4C FAM148C KIAA1957 NLF3	Homo sapiens (Human)	421
Q4AC94	C2CD3_HUMAN	reviewed	C2 domain-containing protein 3	C2CD3	Homo sapiens (Human)	2353
Q86YS7	C2CD5_HUMAN	reviewed	C2 domain-containing protein 5 (C2 domain-containing phosphoprotein of 138 kDa)	C2CD5 CDP138 KIAA0528	Homo sapiens (Human)	1000
Q6P1N0	C2D1A_HUMAN	reviewed	Coiled-coil and C2 domain-containing protein 1A (Akt kinase-interacting protein 1) (Five prime repressor element under dual repression-binding protein 1) (FRE under dual repression-binding protein 1) (Freud-1) (Putative NF-kappa-B-activating protein 023N)	CC2D1A AKI1	Homo sapiens (Human)	951
Q5T0F9	C2D1B_HUMAN	reviewed	Coiled-coil and C2 domain-containing protein 1B (Five prime repressor element under dual repression-binding protein 2) (FRE under dual repression-binding protein 2) (Freud-2)	CC2D1B KIAA1836	Homo sapiens (Human)	858
Q9P2K1	C2D2A_HUMAN	reviewed	Coiled-coil and C2 domain-containing protein 2A	CC2D2A KIAA1345	Homo sapiens (Human)	1620
Q6DHV5	C2D2B_HUMAN	reviewed	Protein CC2D2B	CC2D2B C10orf130	Homo sapiens (Human)	322
B7Z1M9	C2D4D_HUMAN	reviewed	C2 calcium-dependent domain-containing protein 4D	C2CD4D FAM148D	Homo sapiens (Human)	353
Q6ZSU1	C2G1P_HUMAN	reviewed	Putative inactive cytochrome P450 2G1 (Cytochrome P450 2G1 pseudogene)	CYP2G1P CYP2GP1	Homo sapiens (Human)	146
P33076	C2TA_HUMAN	reviewed	MHC class II transactivator (CIITA)	CIITA MHC2TA	Homo sapiens (Human)	1130
Q16581	C3AR_HUMAN	reviewed	C3a anaphylatoxin chemotactic receptor (C3AR) (C3a-R)	C3AR1 AZ3B C3R1 HNFAG09	Homo sapiens (Human)	482
Q6ZMU1	C3P1_HUMAN	reviewed	Putative protein C3P1	C3P1	Homo sapiens (Human)	363
Q9NRR8	C42S1_HUMAN	reviewed	CDC42 small effector protein 1 (CDC42-binding protein SCIP1) (Small effector of CDC42 protein 1)	CDC42SE1 SPEC1	Homo sapiens (Human)	79
Q9NRR3	C42S2_HUMAN	reviewed	CDC42 small effector protein 2 (Small effector of CDC42 protein 2)	CDC42SE2 SPEC2	Homo sapiens (Human)	84
Q9Y5P4	C43BP_HUMAN	reviewed	Collagen type IV alpha-3-binding protein (Ceramide transfer protein) (hCERT) (Goodpasture antigen-binding protein) (GPBP) (START domain-containing protein 11) (StARD11) (StAR-related lipid transfer protein 11)	COL4A3BP CERT STARD11	Homo sapiens (Human)	624
P04003	C4BPA_HUMAN	reviewed	C4b-binding protein alpha chain (C4bp) (Proline-rich protein) (PRP)	C4BPA C4BP	Homo sapiens (Human)	597
P20851	C4BPB_HUMAN	reviewed	C4b-binding protein beta chain	C4BPB	Homo sapiens (Human)	252
Q9H0H9	C4F30_HUMAN	reviewed	Putative cytochrome P450 family member 4F30	CYP4F30P C2orf14	Homo sapiens (Human)	118
Q99643	C560_HUMAN	reviewed	Succinate dehydrogenase cytochrome b560 subunit, mitochondrial (Integral membrane protein CII-3) (QPs-1) (QPs1) (Succinate dehydrogenase complex subunit C) (Succinate-ubiquinone oxidoreductase cytochrome B large subunit) (CYBL)	SDHC CYB560 SDH3	Homo sapiens (Human)	169
Q8N8Q1	C56D1_HUMAN	reviewed	Cytochrome b561 domain-containing protein 1	CYB561D1	Homo sapiens (Human)	229
O14569	C56D2_HUMAN	reviewed	Cytochrome b561 domain-containing protein 2 (Putative tumor suppressor protein 101F6)	CYB561D2 101F6 LUCA12.2	Homo sapiens (Human)	222
Q9P296	C5ARL_HUMAN	reviewed	C5a anaphylatoxin chemotactic receptor C5L2 (G-protein coupled receptor 77)	GPR77 C5L2	Homo sapiens (Human)	337
P21730	C5AR_HUMAN	reviewed	C5a anaphylatoxin chemotactic receptor (C5a-R) (C5aR) (CD antigen CD88)	C5AR1 C5AR C5R1	Homo sapiens (Human)	350
Q9UKL3	C8AP2_HUMAN	reviewed	CASP8-associated protein 2 (FLICE-associated huge protein)	CASP8AP2 FLASH KIAA1315 RIP25	Homo sapiens (Human)	1982
Q8TCZ2	C99L2_HUMAN	reviewed	CD99 antigen-like protein 2 (MIC2-like protein 1) (CD antigen CD99)	CD99L2 MIC2L1 UNQ1964/PRO4486	Homo sapiens (Human)	262
Q9H246	CA021_HUMAN	reviewed	Uncharacterized protein C1orf21 (Cell proliferation-inducing gene 13 protein)	C1orf21 PIG13	Homo sapiens (Human)	121
Q9BWL3	CA043_HUMAN	reviewed	Uncharacterized protein C1orf43 (Hepatitis C virus NS5A-transactivated protein 4) (HCV NS5A-transactivated protein 4) (Protein NICE-3) (S863-3)	C1orf43 NICE3 NS5ATP4 HSPC012	Homo sapiens (Human)	253
Q9BV19	CA050_HUMAN	reviewed	Uncharacterized protein C1orf50	C1orf50	Homo sapiens (Human)	199
Q8N365	CA051_HUMAN	reviewed	Uncharacterized protein C1orf51	C1orf51	Homo sapiens (Human)	385
Q8N6N3	CA052_HUMAN	reviewed	UPF0690 protein C1orf52 (BCL10-associated gene protein)	C1orf52 BAG GM117	Homo sapiens (Human)	182
Q5VUE5	CA053_HUMAN	reviewed	Uncharacterized protein C1orf53	C1orf53	Homo sapiens (Human)	145
Q8WWF1	CA054_HUMAN	reviewed	Uncharacterized protein C1orf54	C1orf54	Homo sapiens (Human)	131
Q9BUV0	CA063_HUMAN	reviewed	UPF0471 protein C1orf63	C1orf63 HT033 NPD014	Homo sapiens (Human)	290
Q8NEQ6	CA064_HUMAN	reviewed	Uncharacterized protein C1orf64	C1orf64	Homo sapiens (Human)	169
Q8N715	CA065_HUMAN	reviewed	Uncharacterized protein C1orf65	C1orf65	Homo sapiens (Human)	623
Q96LT6	CA074_HUMAN	reviewed	UPF0739 protein C1orf74	C1orf74	Homo sapiens (Human)	269
Q8N0U7	CA087_HUMAN	reviewed	Uncharacterized protein C1orf87	C1orf87	Homo sapiens (Human)	546
Q6P1W5	CA094_HUMAN	reviewed	Uncharacterized protein C1orf94	C1orf94	Homo sapiens (Human)	598
Q69YW2	CA095_HUMAN	reviewed	Uncharacterized membrane protein C1orf95	C1orf95	Homo sapiens (Human)	141
Q9BRT7	CA097_HUMAN	reviewed	Putative uncharacterized protein encoded by LINC00467	LINC00467 C1orf97	Homo sapiens (Human)	94
Q5SVJ3	CA100_HUMAN	reviewed	Uncharacterized protein C1orf100	C1orf100	Homo sapiens (Human)	147
Q5SY80	CA101_HUMAN	reviewed	Uncharacterized protein C1orf101	C1orf101	Homo sapiens (Human)	951
O95561	CA105_HUMAN	reviewed	Uncharacterized protein C1orf105	C1orf105	Homo sapiens (Human)	183
Q3KP66	CA106_HUMAN	reviewed	Uncharacterized protein C1orf106	C1orf106	Homo sapiens (Human)	663
Q9NX04	CA109_HUMAN	reviewed	Uncharacterized protein C1orf109	C1orf109	Homo sapiens (Human)	203
Q86UF4	CA110_HUMAN	reviewed	Coiled-coil domain-containing protein C1orf110	C1orf110	Homo sapiens (Human)	302
Q5T0L3	CA111_HUMAN	reviewed	Uncharacterized protein C1orf111	C1orf111 HSD20	Homo sapiens (Human)	261
Q9NSG2	CA112_HUMAN	reviewed	Uncharacterized protein C1orf112	C1orf112	Homo sapiens (Human)	853
Q5TID7	CA114_HUMAN	reviewed	Uncharacterized protein C1orf114	C1orf114	Homo sapiens (Human)	509
Q9H7X2	CA115_HUMAN	reviewed	Uncharacterized protein C1orf115	C1orf115	Homo sapiens (Human)	142
Q6ZSJ8	CA122_HUMAN	reviewed	Uncharacterized protein C1orf122 (Protein ALAESM)	C1orf122	Homo sapiens (Human)	110
Q9NWV4	CA123_HUMAN	reviewed	UPF0587 protein C1orf123	C1orf123	Homo sapiens (Human)	160
Q8N9H9	CA127_HUMAN	reviewed	Uncharacterized protein C1orf127	C1orf127	Homo sapiens (Human)	656
Q8NDD1	CA131_HUMAN	reviewed	Uncharacterized protein C1orf131	C1orf131	Homo sapiens (Human)	294
Q5TEV5	CA134_HUMAN	reviewed	Putative uncharacterized protein C1orf134	C1orf134	Homo sapiens (Human)	83
Q5JT78	CA137_HUMAN	reviewed	Putative uncharacterized protein C1orf137	C1orf137	Homo sapiens (Human)	98
Q5T5F5	CA138_HUMAN	reviewed	Uncharacterized protein C1orf138	C1orf138	Homo sapiens (Human)	129
Q5VVS0	CA140_HUMAN	reviewed	Putative uncharacterized protein C1orf140	C1orf140	Homo sapiens (Human)	124
Q5JVX7	CA141_HUMAN	reviewed	Uncharacterized protein C1orf141	C1orf141	Homo sapiens (Human)	400
Q96MR7	CA145_HUMAN	reviewed	Putative uncharacterized protein C1orf145	C1orf145	Homo sapiens (Human)	158
Q5VVC0	CA146_HUMAN	reviewed	Uncharacterized protein C1orf146	C1orf146	Homo sapiens (Human)	180
Q96MC9	CA147_HUMAN	reviewed	Uncharacterized protein C1orf147	C1orf147	Homo sapiens (Human)	270
B1ANH7	CA148_HUMAN	reviewed	Putative uncharacterized protein C1orf148	C1orf148	Homo sapiens (Human)	110
Q3SY05	CA157_HUMAN	reviewed	Putative uncharacterized protein encoded by LINC00303	LINC00303 C1orf157 NCRNA00303	Homo sapiens (Human)	128
Q8N1D5	CA158_HUMAN	reviewed	Uncharacterized protein C1orf158	C1orf158	Homo sapiens (Human)	194
Q96HA4	CA159_HUMAN	reviewed	Uncharacterized protein C1orf159	C1orf159 UNQ2998/PRO9739	Homo sapiens (Human)	380
Q8NEQ5	CA162_HUMAN	reviewed	Transmembrane protein C1orf162	C1orf162	Homo sapiens (Human)	155
Q5SNV9	CA167_HUMAN	reviewed	Uncharacterized protein C1orf167	C1orf167	Homo sapiens (Human)	1468
Q5VWT5	CA168_HUMAN	reviewed	Uncharacterized protein C1orf168	C1orf168	Homo sapiens (Human)	728
Q5SV97	CA170_HUMAN	reviewed	Uncharacterized protein C1orf170	C1orf170	Homo sapiens (Human)	696
Q8NAX2	CA172_HUMAN	reviewed	Uncharacterized protein C1orf172	C1orf172	Homo sapiens (Human)	398
Q5RHP9	CA173_HUMAN	reviewed	Uncharacterized protein C1orf173	C1orf173	Homo sapiens (Human)	1530
Q8IYL3	CA174_HUMAN	reviewed	UPF0688 protein C1orf174	C1orf174	Homo sapiens (Human)	243
Q3ZCV2	CA177_HUMAN	reviewed	Uncharacterized protein C1orf177	C1orf177	Homo sapiens (Human)	418
Q8NAE3	CA180_HUMAN	reviewed	Putative uncharacterized protein C1orf180	C1orf180	Homo sapiens (Human)	123
Q5T7R7	CA185_HUMAN	reviewed	Uncharacterized protein C1orf185	C1orf185	Homo sapiens (Human)	199
Q6ZWK4	CA186_HUMAN	reviewed	Uncharacterized protein C1orf186	C1orf186	Homo sapiens (Human)	172
Q5VU69	CA189_HUMAN	reviewed	Uncharacterized protein C1orf189	C1orf189	Homo sapiens (Human)	101
Q7Z2R9	CA191_HUMAN	reviewed	Putative uncharacterized protein C1orf191	C1orf191 MSTP128	Homo sapiens (Human)	100
Q5VTH2	CA192_HUMAN	reviewed	UPF0740 protein C1orf192	C1orf192	Homo sapiens (Human)	177
Q5T5A4	CA194_HUMAN	reviewed	Uncharacterized protein C1orf194	C1orf194	Homo sapiens (Human)	169
Q5TG92	CA195_HUMAN	reviewed	Putative uncharacterized protein C1orf195	C1orf195	Homo sapiens (Human)	126
B1AJZ1	CA196_HUMAN	reviewed	Putative uncharacterized protein C1orf196	C1orf196	Homo sapiens (Human)	125
Q9H425	CA198_HUMAN	reviewed	Uncharacterized protein C1orf198	C1orf198	Homo sapiens (Human)	327
Q5SR53	CA200_HUMAN	reviewed	Putative uncharacterized protein C1orf200	C1orf200	Homo sapiens (Human)	167
Q8IVY1	CA210_HUMAN	reviewed	Putative uncharacterized protein C1orf210	C1orf210	Homo sapiens (Human)	113
Q8N6G1	CA211_HUMAN	reviewed	Putative uncharacterized protein encoded by LINC00337	LINC00337 C1orf211 NCRNA00337	Homo sapiens (Human)	96
Q8NC38	CA213_HUMAN	reviewed	Putative uncharacterized protein C1orf213	C1orf213	Homo sapiens (Human)	126
Q8TAB5	CA216_HUMAN	reviewed	UPF0500 protein C1orf216	C1orf216	Homo sapiens (Human)	229
Q5T0J3	CA220_HUMAN	reviewed	Putative uncharacterized protein C1orf220	C1orf220	Homo sapiens (Human)	134
Q69YW0	CA222_HUMAN	reviewed	Uncharacterized protein C1orf222	C1orf222	Homo sapiens (Human)	305
A1L170	CA226_HUMAN	reviewed	Uncharacterized protein C1orf226	C1orf226	Homo sapiens (Human)	272
Q537H7	CA227_HUMAN	reviewed	UPF0732 protein C1orf227	C1orf227 HSD-44 HSD44	Homo sapiens (Human)	98
Q6PIY5	CA228_HUMAN	reviewed	Uncharacterized protein C1orf228 (p40)	C1orf228 NCRNA00082	Homo sapiens (Human)	440
Q6ZS94	CA229_HUMAN	reviewed	Putative uncharacterized protein C1orf229	C1orf229	Homo sapiens (Human)	237
F2Z333	CA233_HUMAN	reviewed	Fibronectin type-III domain-containing transmembrane protein C1orf233	C1orf233	Homo sapiens (Human)	226
P54289	CA2D1_HUMAN	reviewed	Voltage-dependent calcium channel subunit alpha-2/delta-1 (Voltage-gated calcium channel subunit alpha-2/delta-1) [Cleaved into: Voltage-dependent calcium channel subunit alpha-2-1; Voltage-dependent calcium channel subunit delta-1]	CACNA2D1 CACNL2A CCHL2A MHS3	Homo sapiens (Human)	1103
Q9NY47	CA2D2_HUMAN	reviewed	Voltage-dependent calcium channel subunit alpha-2/delta-2 (Voltage-gated calcium channel subunit alpha-2/delta-2) [Cleaved into: Voltage-dependent calcium channel subunit alpha-2-2; Voltage-dependent calcium channel subunit delta-2]	CACNA2D2 KIAA0558	Homo sapiens (Human)	1150
Q8IZS8	CA2D3_HUMAN	reviewed	Voltage-dependent calcium channel subunit alpha-2/delta-3 (Voltage-gated calcium channel subunit alpha-2/delta-3) [Cleaved into: Voltage-dependent calcium channel subunit alpha-2-3; Voltage-dependent calcium channel subunit delta-3]	CACNA2D3	Homo sapiens (Human)	1091
Q7Z3S7	CA2D4_HUMAN	reviewed	Voltage-dependent calcium channel subunit alpha-2/delta-4 (Voltage-gated calcium channel subunit alpha-2/delta-4) [Cleaved into: Voltage-dependent calcium channel subunit alpha-2-4; Voltage-dependent calcium channel subunit delta-4]	CACNA2D4	Homo sapiens (Human)	1137
Q8WTZ4	CA5BL_HUMAN	reviewed	Putative inactive carbonic anhydrase 5B-like protein (CA-VB-like protein)	CA5BP1 CA5B CA5BL	Homo sapiens (Human)	195
Q9H8G2	CAAP1_HUMAN	reviewed	Caspase activity and apoptosis inhibitor 1 (Conserved anti-apoptotic protein) (CAAP)	CAAP1 C9orf82 CAAP	Homo sapiens (Human)	361
Q8N1I8	CAAS1_HUMAN	reviewed	Putative uncharacterized protein encoded by CACTIN-AS1 (Cactin antisense RNA 1)	CACTIN-AS1 C19orf29-AS1 C19orf29OS	Homo sapiens (Human)	211
Q9Y376	CAB39_HUMAN	reviewed	Calcium-binding protein 39 (MO25alpha) (Protein Mo25)	CAB39 MO25 CGI-66	Homo sapiens (Human)	341
Q9BRK5	CAB45_HUMAN	reviewed	45 kDa calcium-binding protein (Cab45) (Stromal cell-derived factor 4) (SDF-4)	SDF4 CAB45 PSEC0034	Homo sapiens (Human)	362
Q9Y6J0	CABIN_HUMAN	reviewed	Calcineurin-binding protein cabin-1 (Calcineurin inhibitor) (CAIN)	CABIN1 KIAA0330	Homo sapiens (Human)	2220
Q8TDN4	CABL1_HUMAN	reviewed	CDK5 and ABL1 enzyme substrate 1 (Interactor with CDK3 1) (Ik3-1)	CABLES1 CABLES	Homo sapiens (Human)	633
Q9BTV7	CABL2_HUMAN	reviewed	CDK5 and ABL1 enzyme substrate 2 (Interactor with CDK3 2) (Ik3-2)	CABLES2 C20orf150	Homo sapiens (Human)	478
Q9NZU7	CABP1_HUMAN	reviewed	Calcium-binding protein 1 (CaBP1) (Calbrain) (Caldendrin)	CABP1	Homo sapiens (Human)	370
Q9NPB3	CABP2_HUMAN	reviewed	Calcium-binding protein 2 (CaBP2)	CABP2	Homo sapiens (Human)	220
P57796	CABP4_HUMAN	reviewed	Calcium-binding protein 4 (CaBP4)	CABP4	Homo sapiens (Human)	275
Q9NP86	CABP5_HUMAN	reviewed	Calcium-binding protein 5 (CaBP5)	CABP5 CABP3	Homo sapiens (Human)	173
Q86V35	CABP7_HUMAN	reviewed	Calcium-binding protein 7 (CaBP7) (Calneuron II) (Calneuron-2)	CABP7 CALN2	Homo sapiens (Human)	215
Q9BXU9	CABP8_HUMAN	reviewed	Calcium-binding protein 8 (CaBP8) (Calneuron I) (Calneuron-1)	CALN1 CABP8	Homo sapiens (Human)	219
Q96KC9	CABS1_HUMAN	reviewed	Calcium-binding and spermatid-specific protein 1 (Testis development protein NYD-SP26)	CABS1 C4orf35	Homo sapiens (Human)	395
O75952	CABYR_HUMAN	reviewed	Calcium-binding tyrosine phosphorylation-regulated protein (Calcium-binding protein 86) (Cancer/testis antigen 88) (CT88) (Fibrousheathin II) (Fibrousheathin-2) (FSP-2) (Testis-specific calcium-binding protein CBP86)	CABYR CBP86 FSP2	Homo sapiens (Human)	493
O00555	CAC1A_HUMAN	reviewed	Voltage-dependent P/Q-type calcium channel subunit alpha-1A (Brain calcium channel I) (BI) (Calcium channel, L type, alpha-1 polypeptide isoform 4) (Voltage-gated calcium channel subunit alpha Cav2.1)	CACNA1A CACH4 CACN3 CACNL1A4	Homo sapiens (Human)	2505
[truncated: 18,250 more rows]
