# Supplementary material for: Protein-Protein Interactions: Gene Acronym Redundancies and Current Limitations Precluding Automated Data Integration
Source: Proteomes. 2013 May 31;1(1):3–24. doi: 10.3390/proteomes1010003 (PMC5314489; doi:10.3390/proteomes1010003)
Supplement: Supplementary file 4 [file proteomes-01-00003-s004.xlsx]

## Sheet: PPIase gene symbol
GeneID	map_location	Symbol_from_nomenclature_authority	Synonyms (different synonyms separated by | symbols)	Full_name_from_nomenclature_authority (HUGO)	Other_designations
2280	20p13	FKBP1A	FKBP-12|FKBP-1A|FKBP1|FKBP12|PKC12|PKCI2|PPIASE	FK506 binding protein 1A, 12kDa	PPIase FKBP1A|12 kDa FK506-binding protein|12 kDa FKBP|FK506 binding protein12|FK506-binding protein 1|FK506-binding protein 12|FK506-binding protein 1A (12kD)|FK506-binding protein, T-cell, 12-kD|FKBP12-Exip3|calstabin-1|immunophilin FKBP12|peptidyl-prolyl cis-trans isomerase FKBP1A|protein kinase C inhibitor 2|rotamase
2281	2p23.3	FKBP1B	FKBP12.6|FKBP1L|OTK4|PKBP1L|PPIase	FK506 binding protein 1B, 12.6 kDa	PPIase FKBP1B|12.6 kDa FK506-binding protein|12.6 kDa FKBP|FK506-binding protein 12.6|FK506-binding protein 1B|FKBP-12.6|FKBP-1B|calstabin 2|h-FKBP-12|immunophilin FKBP12.6|peptidyl-prolyl cis-trans isomerase FKBP1B|rotamase
2286	11q13.1-q13.3	FKBP2	FKBP-13|PPIase	FK506 binding protein 2, 13kDa	PPIase FKBP2|13 kDa FK506-binding protein|13 kDa FKBP|FK506-binding protein 2 (13kD)|FKBP-2|immunophilin FKBP13|peptidyl-prolyl cis-trans isomerase FKBP2|proline isomerase|rapamycin-binding protein|rotamase
2287	14q21.2	FKBP3	FKBP-25|FKBP-3|FKBP25|PPIase	FK506 binding protein 3, 25kDa	PPIase FKBP3|25 kDa FK506-binding protein|25 kDa FKBP|FK506-binding protein 25, T-cell|FK506-binding protein 3 (25kD)|immunophilin FKBP25|peptidyl-prolyl cis-trans isomerase FKBP3|rapamycin binding protein|rapamycin-selective 25 kDa immunophilin|rotamase
2288	12p13.33	FKBP4	FKBP51|FKBP52|FKBP59|HBI|Hsp56|PPIase|p52	FK506 binding protein 4, 59kDa	51 kDa FK506-binding protein|FK506-binding protein 4 (59kD)|HSP binding immunophilin|T-cell FK506-binding protein, 59kD|peptidyl-prolyl cis-trans isomerase FKBP4|peptidylprolyl cis-trans isomerase|rotamase
2289	6p21.31	FKBP5	AIG6|FKBP51|FKBP54|P54|PPIase|Ptg-10	FK506 binding protein 5	PPIase FKBP5|51 kDa FK506-binding protein 5|51 kDa FKBP|54 kDa progesterone receptor-associated immunophilin|FF1 antigen|FKBP-5|FKBP-51|HSP90-binding immunophilin|T-cell FK506-binding protein|androgen-regulated protein 6|peptidyl-prolyl cis-trans isomerase FKBP5|peptidylprolyl cis-trans isomerase|rotamase
8468	7q11.23	FKBP6	FKBP36|PPIase	FK506 binding protein 6, 36kDa	PPIase FKBP6|36 kDa FK506-binding protein|36 kDa FKBP|FK506-binding protein 6|FKBP-36|immunophilin FKBP36|peptidyl-prolyl cis-trans isomerase FKBP6|rotamase
11328	7p11.1	FKBP9	FKBP60|FKBP63|PPIase	FK506 binding protein 9, 63 kDa	PPIase FKBP9|63 kDa FK506-binding protein|63 kDa FKBP|FK506-binding protein 9|FKBP-63|FKBP-9|peptidyl-prolyl cis-trans isomerase FKBP9|rotamase
51661	2q31.2	FKBP7	FKBP23|PPIase	FK506 binding protein 7	PPIase FKBP7|23 kDa FK506-binding protein|23 kDa FKBP|FK506-binding protein 23|FK506-binding protein 7|FKBP-23|FKBP-7|peptidyl-prolyl cis-trans isomerase FKBP7|rotamase
60681	17q21.2	FKBP10	FKBP65|OI11|OI6|PPIASE|hFKBP65	FK506 binding protein 10, 65 kDa	PPIase FKBP10|65 kDa FK506-binding protein|65 kDa FKBP|FK506-binding protein 10|FKBP-10|FKBP-65|immunophilin FKBP65|peptidyl-prolyl cis-trans isomerase FKBP10|rotamase
5300	19p13	PIN1	DOD|UBL5	peptidylprolyl cis/trans isomerase, NIMA-interacting 1	PPIase Pin1|peptidyl-prolyl cis-trans isomerase NIMA-interacting 1|protein (peptidyl-prolyl cis/trans isomerase) NIMA-interacting 1|rotamase Pin1
5303	Xq13	PIN4	EPVH|PAR14|PAR17	protein (peptidylprolyl cis/trans isomerase) NIMA-interacting, 4 (parvulin)	PPIase PIN4|eukaryotic parvulin homolog|hEPVH|hPar14|hPar17|parvulin-14|parvulin-17|peptidyl-prolyl cis-trans isomerase NIMA-interacting 4|peptidyl-prolyl cis-trans isomerase Pin4|peptidyl-prolyl cis/trans isomerase EPVH|rotamase PIN4
5478	7p13	PPIA	CYPA|CYPH	peptidylprolyl isomerase A (cyclophilin A)	PPIase A|T cell cyclophilin|cyclophilin|cyclosporin A-binding protein|peptidyl-prolyl cis-trans isomerase A|rotamase A
5479	15q21-q22	PPIB	CYP-S1|CYPB|OI9|SCYLP	peptidylprolyl isomerase B (cyclophilin B)	PPIase B|S-cyclophilin|cyclophilin-like protein|peptidyl-prolyl cis-trans isomerase B|rotamase B
5480	5q23.2	PPIC	CYPC	peptidylprolyl isomerase C (cyclophilin C)	PPIase C|cyclophilin C|parvulin|peptidyl-prolyl cis-trans isomerase C|rotamase C
5481	4q31.3	PPID	CYP-40|CYPD	peptidylprolyl isomerase D	PPIase D|40 kDa peptidyl-prolyl cis-trans isomerase D|cyclophilin 40|cyclophilin D|cyclophilin-40|cyclophilin-related protein|peptidyl-prolyl cis-trans isomerase D|rotamase D
9360	2q31.1	PPIG	CARS-Cyp|CYP|SCAF10|SRCyp	peptidylprolyl isomerase G (cyclophilin G)	PPIase G|CARS-cyclophilin|CASP10|Clk-associating RS-cyclophilin|SR-cyclophilin|SR-cyp|SR-related CTD-associated factor 10|cyclophilin G|peptidyl-prolyl cis-trans isomerase G|peptidyl-prolyl isomerase G (cyclophilin G)|rotamase G
10105	10q22-q23	PPIF	CYP3|Cyp-D	peptidylprolyl isomerase F	PPIase F|cyclophilin 3|cyclophilin D|cyclophilin F|peptidyl-prolyl cis-trans isomerase F, mitochondrial|peptidyl-prolyl cis-trans isomerase, mitochondrial|rotamase F
10283	5q12.3	CWC27	NY-CO-10|SDCCAG10	CWC27 spliceosome-associated protein homolog (S. cerevisiae)	PPIase CWC27|PPIase SDCCAG10|antigen NY-CO-10|peptidyl-prolyl cis-trans isomerase CWC27 homolog|peptidyl-prolyl cis-trans isomerase SDCCAG10|serologically defined colon cancer antigen 10
10450	1p32	PPIE	CYP-33|CYP33	peptidylprolyl isomerase E (cyclophilin E)	PPIase E|cyclophilin-33|peptidyl-prolyl cis-trans isomerase E|rotamase E
10465	1p34.1	PPIH	CYP-20|CYPH|SnuCyp-20|USA-CYP	peptidylprolyl isomerase H (cyclophilin H)	PPIase h|U-snRNP-associated cyclophilin SnuCyp-20|U-snRNP-associated cyclophilin SunCyp-20|USA-CyP SnuCyp-20|cyclophilin H|peptidyl-prolyl cis-trans isomerase H|rotamase H|small nuclear ribonucleoprotein particle-specific cyclophilin H
23759	22q11.21	PPIL2	CYC4|CYP60|Cyp-60|hCyP-60	peptidylprolyl isomerase (cyclophilin)-like 2	PPIase|cyclophilin, 60kDa|cyclophilin-60|cyclophilin-like protein CyP-60|peptidyl-prolyl cis-trans isomerase-like 2|peptidylprolyl cis-trans isomerase|rotamase PPIL2
23770	19p12	FKBP8	FKBP38|FKBPr38	FK506 binding protein 8, 38kDa	PPIase FKBP8|38 kDa FK506-binding protein|38 kDa FKBP|FK506-binding protein 8 (38kD)|FKBP-38|FKBP-8|hFKBP38|peptidyl-prolyl cis-trans isomerase FKBP8|rotamase
51303	12q13.12	FKBP11	FKBP19	FK506 binding protein 11, 19 kDa	PPIase FKBP11|19 kDa FK506-binding protein|19 kDa FKBP|FK506-binding protein 11|FKBP-11|FKBP-19|peptidyl-prolyl cis-trans isomerase FKBP11|rotamase
53938	2q33.1	PPIL3	CYPJ	peptidylprolyl isomerase (cyclophilin)-like 3	PPIase|PPIase-like protein 3|cyclophilin J|cyclophilin-like protein 3|cyclophilin-like protein PPIL3|peptidyl-prolyl cis-trans isomerase-like 3|peptidylprolyl cis-trans isomerase-like protein 3|rotamase PPIL3
55033	7p14.3	FKBP14	EDSKMH|FKBP22|IPBP12	FK506 binding protein 14, 22 kDa	PPIase FKBP14|22 kDa FK506-binding protein|22 kDa FKBP|FK506-binding protein 14|FKBP-22|peptidyl-prolyl cis-trans isomerase FKBP14|rotamase
85313	6q25.1	PPIL4	HDCME13P	peptidylprolyl isomerase (cyclophilin)-like 4	PPIase|cyclophilin-like protein PPIL4|cyclophilin-type peptidyl-prolyl cis-trans isomerase|peptidyl-prolyl cis-trans isomerase-like 4|rotamase PPIL4|serologically defined breast cancer antigen NY-BR-18
164022	1q21.2	PPIAL4A	COAS2|PPIAL4	peptidylprolyl isomerase A (cyclophilin A)-like 4A	PPIase A-like 4A|COAS-2|PPIase A-like 4B|PPIase A-like 4G|chromosome 1 amplified sequence 2|chromosome 1-amplified sequence 2|cyclophilin homolog overexpressed in liver cancer|cyclophilin-LC (COAS2)|peptidyl-prolyl cis-trans isomerase A-like 4A/B/C|peptidylprolyl cis-trans isomerase A-like 4|peptidylprolyl cis-trans isomerase A-like 4A|peptidylprolyl cis-trans isomerase A-like 4B|peptidylprolyl i…
285755	6q21	PPIL6	RSPH12|bA425D10.6|dJ919F19.1	peptidylprolyl isomerase (cyclophilin)-like 6	PPIase|cyclophilin-like protein PPIL6|peptidyl-prolyl cis-trans isomerase-like 6|peptidyl-prolyl cis-trans isomerase-like variant a|radial spoke 12 homolog|rotamase PPIL6
644591	1q21.1	PPIAL4G	BX284650.5	peptidylprolyl isomerase A (cyclophilin A)-like 4G	PPIase A-like 4A|COAS-2|PPIase A-like 4G|chromosome 1-amplified sequence 2|peptidyl-prolyl cis-trans isomerase A-like 4G|peptidylprolyl cis-trans isomerase A-like 4|peptidylprolyl cis-trans isomerase A-like 4A|peptidylprolyl cis-trans isomerase A-like 4G
653598	1q21.2	PPIAL4C	COAS-2	peptidylprolyl isomerase A (cyclophilin A)-like 4C	PPIase A-like 4A|chromosome 1-amplified sequence 2|cyclophilin homolog overexpressed in liver cancer|peptidyl-prolyl cis-trans isomerase A-like 4A/B/C|peptidylprolyl cis-trans isomerase A-like 4A/B/C
